# Supplementary material
Source: PubMed Central journal article supplement (PMC3174773)
Supplement: NIHMS312853-supplement-1_si_001.pdf [file NIHMS312853-supplement-1_si_001.pdf]

# Supporting Information

## Chemical Synthesis Enables Biochemical and Antibacterial Evaluation of Streptolydigin Antibiotics

*Sergey V. Pronin,<sup>1</sup> Anthony Martinez,<sup>1</sup> Konstantin Kuznedelov,<sup>2</sup> Konstantin Severinov,<sup>2,3</sup>*

*Howard A. Shuman<sup>4</sup> and Sergey A. Kozmin<sup>1\*</sup>*

<sup>1</sup>Department of Chemistry, University of Chicago, Chicago, Illinois 60607, United States;

<sup>2</sup>Department of Molecular Biology and Biochemistry, Rutgers University, Piscataway,

New Jersey 08854, United States; <sup>3</sup>Institutes of Gene Biology and Molecular Genetics,

Russian Academy of Sciences, Moscow, Russia; <sup>4</sup>Department of Microbiology,

University of Chicago, Chicago, Illinois 60607, United States

\*Corresponding Author: [skozmin@uchicago.edu](mailto:skozmin@uchicago.edu)

## Experimental Procedure

**General.** All reactions were carried out under positive pressure of nitrogen unless otherwise noted. Ethyl acetate (ACS grade and HPLC grade), hexanes (ACS grade and HPLC grade), diethyl ether (anhydrous grade), toluene (HPLC grade), methanol (HPLC grade), chloroform (HPLC grade), acetone (ACS grade), *N,N*-dimethylacetamide (Anhydrous grade), and *tert*-butanol (ACS grade) were purchased from FisherScientific and used without further purification. Tetrahydrofuran was distilled from sodium-benzophenone under positive pressure of nitrogen. Dichloromethane was distilled from calcium hydride under positive pressure of nitrogen. Commercially available reagents were used without further purification unless otherwise noted. Authentic sample of streptolydigin was purchased from ChemCon GmbH (<http://www.chemcon.com/>). Reactions were monitored by thin layer chromatography (TLC) using Whatman precoated silica gel plates. Flash column chromatography was performed over ultra pure silica gel (230-400 mesh) from Silicycle. Preparative TLC was performed using Whatman precoated silica gel plates. <sup>1</sup>H NMR and <sup>13</sup>C NMR spectra were recorded on Bruker DMX-500 and DRX-400 spectrometers using residual solvent peaks as an internal standard. Optical rotations were measured with JASCO DIP-1000 digital polarimeter, using the sodium D line. High-resolution mass spectra were recorded with Waters Q-Top Ultima tandem quadrupole/Time-of-Flight instrument. All cell lines and media were purchased from American Type Culture Collection (ATCC).

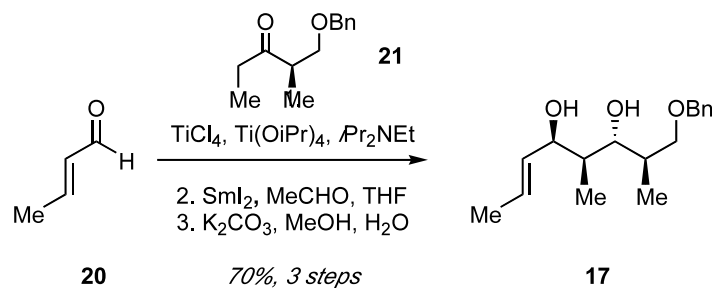

**Diol 17.**  $\text{Ti(Oi-Pr)}_4$  (distilled prior to use, 7.66 mL, 0.0259 mol) was added to a stirred solution of  $\text{TiCl}_4$  (distilled prior to use, 8.5 mL, 0.0776 mol) in dichloromethane (125 mL) at 0 °C. The resulting solution was stirred for 10 min, warmed to room temperature, diluted with dichloromethane (125 mL), and transferred into a stirred solution of (2*R*)-1-(benzyloxy)-2-methylpentan-3-one **21**<sup>1</sup> (19.4 g, 0.094 mol) in dichloromethane (200 mL) at -78 °C (rinsed flask with 30 mL of dichloromethane). Hunig's base (18 mL, 0.103 mol) was then added dropwise, and the resulting solution was stirred for 30 min at -78 °C. Crotonaldehyde (11.8 mL, 0.141 mol) was added dropwise, and stirring was continued for 1 h. The reaction mixture was quenched with saturated aqueous solution of  $\text{NH}_4\text{Cl}$  and warmed to room temperature. Phases were separated, and the aqueous phase was extracted with diethyl ether. The combined organic layers were washed with brine, dried over  $\text{MgSO}_4$  and concentrated *in vacuo* to afford a crude aldol product. A stirred solution of crude hydroxyketone and acetaldehyde (21 mL, 0.376 mol) in THF (240 mL) was treated with  $\text{SmI}_2$  (0.1 M solution in THF, 188 mL, 0.0188 mol) at -20 °C. The reaction mixture was stirred 3 h at -20 °C and quenched with saturated aqueous  $\text{NaHCO}_3$ . The resulting suspension was warmed to room temperature and extracted twice with diethyl ether. The combined organic extracts were washed with brine, dried over  $\text{MgSO}_4$  and concentrated *in vacuo*. The resulting crude acetate was treated with a suspension of

$K_2CO_3$  (26 g, 0.188 mol) in a mixture of methanol (370 mL) and water (30 mL). After 30 min at room temperature, the reaction mixture was concentrated *in vacuo*. The resulting residue was suspended in diethyl ether (500 mL) and washed with brine. The organic phase was dried over  $MgSO_4$  and concentrated *in vacuo*. Purification by flash chromatography on silica gel (elution with hexanes:ethyl acetate 4:1) afforded 18.3 g (70% yield over three steps) of diol **17**.  $[\alpha]_D^{24.1} = +0.6$  ( $c = 3.2$ ,  $CHCl_3$ );  $^1H$  NMR (500 MHz,  $CDCl_3$ )  $\delta$  0.93 (d, 3H,  $J = 7.0$  Hz), 0.97 (d, 3H,  $J = 7.0$  Hz), 1.71 (d, 3H,  $J = 6.5$  Hz), 1.81 (m, 1H), 2.11 (m, 1H), 3.50 (dd, 1H,  $J = 9.0, 7.0$  Hz), 3.57 (m, 1H), 3.69 (dd, 1H,  $J = 9.0, 4.0$  Hz), 3.88 (d, 1H,  $J = 3.0$  Hz), 4.28 (d, 1H,  $J = 4.0$  Hz), 4.40 (m, 1H), 4.53 (m, 2H), 5.54 (ddd, 1H,  $J = 15.5, 6.5, 1.5$  Hz), 5.69 (m, 1H), 7.29-7.37 (m, 5H);  $^{13}C$  NMR (125 MHz,  $CDCl_3$ )  $\delta$  11.8, 14.2, 17.8, 35.5, 39.6, 73.3, 73.7, 75.2, 81.3, 126.3, 127.7, 127.9, 128.6, 131.9, 137.4; HRMS (ESI) calculated for  $C_{17}H_{27}O_3$   $[M+H]^+$  279.1960, found 279.1966.

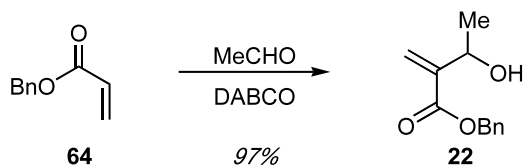

**Alcohol 22.** A mixture of benzyl acrylate (50 g, 0.308 mol), acetaldehyde (13.3 mL, 0.237 mol), and DABCO (6.92 g, 0.062 mol) was left at room temperature for 6 days. Purification by flash chromatography on silica gel (elution with hexanes:Et<sub>2</sub>O 1:1) afforded 47.6 g (97% yield) of known alcohol **22**.<sup>2</sup>  $^1H$  NMR (500 MHz,  $CDCl_3$ )  $\delta$  1.39 (d, 3H,  $J = 6.5$  Hz), 2.69 (d, 1H,  $J = 5.5$  Hz), 4.64 (m, 1H), 5.23 (s, 2H), 5.85 (s, 1H), 6.27 (s, 1H), 7.33-7.40 (m, 5H);  $^{13}C$  NMR (125 MHz,  $CDCl_3$ )  $\delta$  22.1, 66.6, 67.1, 124.5, 128.1,

128.4, 128.6, 135.7, 143.5, 166.4.

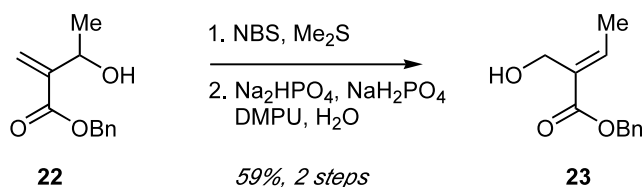

**Benzyl enoate 23.** Dimethyl sulfide (49 mL, 0.667 mol) was added dropwise to a stirred solution of NBS (59.4 g, 0.334 mol) in 1.1 L of dichloromethane at 0 °C. After 1 h at 0 °C, the solution of alcohol **22** (45.9 g, 0.222 mol, in 220 mL of dichloromethane) was transferred into the reaction mixture. The resulting solution was warmed to room temperature and stirred overnight. The reaction mixture was washed with saturated aqueous solution of NaHCO<sub>3</sub>, and the aqueous phase was extracted with Et<sub>2</sub>O. The combined organic solutions were washed with water, brine, dried over MgSO<sub>4</sub> and concentrated *in vacuo*. The resulting crude bromide was transferred into a flask containing Na<sub>2</sub>HPO<sub>4</sub> (63 g, 0.444 mol), NaH<sub>2</sub>PO<sub>4</sub> (53.3 g, 0.444 mol), water (150 mL), and DMPU (300 mL). The resulting mixture was heated to 100 °C for 8 h, cooled to room temperature, and poured into 2.5 L of water. The resulting solution was extracted three times with Et<sub>2</sub>O. The combined organic extracts were washed with water, brine, dried over MgSO<sub>4</sub> and concentrated *in vacuo*. Purification by flash chromatography on silica gel (elution with hexanes:Et<sub>2</sub>O 1:1) afforded 27 g (59% yield over two steps) of benzyl enoate **23**. <sup>1</sup>H NMR (500 MHz, CDCl<sub>3</sub>) δ 1.90 (d, 3H, *J* = 7.5 Hz), 2.56 (t, 1H, *J* = 6.0 Hz), 4.37 (d, 2H, *J* = 5.5 Hz), 5.22 (s, 2H), 7.03 (q, 1H, *J* = 7.5 Hz), 7.32-7.40 (m, 5H); <sup>13</sup>C NMR (125 MHz, CDCl<sub>3</sub>) δ 14.2, 56.9, 66.4, 128.1, 128.3, 128.6, 131.7, 135.8,

141.1, 167.2; HRMS (ESI) calculated for C<sub>12</sub>H<sub>15</sub>O<sub>3</sub> [M+H]<sup>+</sup> 207.1021, found 207.1027.

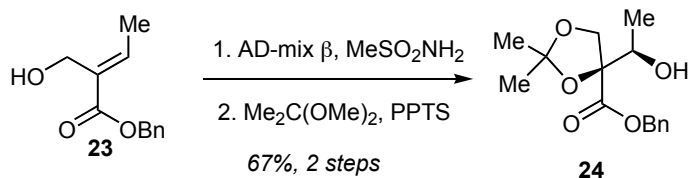

**Alcohol 24.** Benzyl enoate **23** (15 g, 0.131 mol) was added to a stirred solution of K<sub>2</sub>OsO<sub>2</sub>(OH)<sub>4</sub> (0.107 g, 0.00029 mol), (DHQD)<sub>2</sub>PHAL (0.567 g, 0.000727 mol), methanesulfonamide (6.92 g, 0.0727 mol), K<sub>2</sub>CO<sub>3</sub> (30.16 g, 0.218 mol), and K<sub>3</sub>[Fe(CN)<sub>6</sub>] (71.84 g, 0.218 mol) in a mixture of 2-methyl-2-propanol (360 mL) and water (360 mL) at 0 °C. The reaction mixture was stirred overnight at 0 °C, quenched with solid Na<sub>2</sub>SO<sub>3</sub> (100g), and stirred 40 min at room temperature. The resulting suspension was filtered, and solids were washed with ethyl acetate. Layers were separated, and the aqueous layer was extracted twice with ethyl acetate. The combined organic fractions were dried over MgSO<sub>4</sub> and concentrated *in vacuo*. The resulting crude triol was dissolved in acetone (360 mL) and treated with 2,2-dimethoxypropane (67 mL, 0.545 mol) and *p*-toluenesulfonic acid hydrate (1.38 g, 0.00727 mol) at room temperature. After 1 h, the reaction was quenched with triethylamine (5 mL, 0.0364 mol), and volatiles were removed *in vacuo*. The residue was dissolved in Et<sub>2</sub>O, washed with aqueous HCl (1 M solution) and saturated aqueous solution of NaHCO<sub>3</sub>, and concentrated *in vacuo*. Purification by flash chromatography on silica gel (elution with hexanes:ethyl acetate

4:1) afforded 10.6 g of alcohol **24**. Fractions containing undesired acetonides were combined, concentrated, and treated with *p*-toluenesulfonic acid hydrate (1.38 g, 0.00727 mol) in acetone (360 mL). After 1 h at room temperature, the reaction mixture was worked-up and purified as described above to yield additional 3 g of alcohol **24** (13.6 g overall, 67% yield over two steps, 92% *ee*, determined by chiral HPLC: Daicel Chiralcel OD, hexanes:2-propanol 99:1, 1 mL/min, major enantiomer  $t_R = 28.1$  min, minor enantiomer  $t_R = 25.3$  min).  $[\alpha]_D^{24.9} = -7.6$  ( $c = 2.4$ ,  $\text{CHCl}_3$ );  $^1\text{H NMR}$  (500 MHz,  $\text{CDCl}_3$ )  $\delta$  1.15 (d, 3H,  $J = 6.5$  Hz), 1.37 (s, 3H), 1.44 (s, 3H), 2.40 (d, 1H,  $J = 7.0$  Hz), 3.98 (m, 1H), 4.07 (d, 1H,  $J = 9.0$  Hz), 4.29 (d, 1H,  $J = 9.0$  Hz), 5.19 (d, 1H,  $J = 12.0$  Hz), 5.27 (d, 1H,  $J = 12.0$  Hz), 7.32-7.40 (m, 5H);  $^{13}\text{C NMR}$  (125 MHz,  $\text{CDCl}_3$ )  $\delta$  17.3, 25.5, 26.0, 67.3, 68.2, 69.6, 86.8, 111.7, 128.4, 128.5, 128.6, 135.1, 172.5; HRMS (ESI) calculated for  $\text{C}_{15}\text{H}_{21}\text{O}_5$   $[\text{M}+\text{H}]^+$  281.1389, found 281.1387.

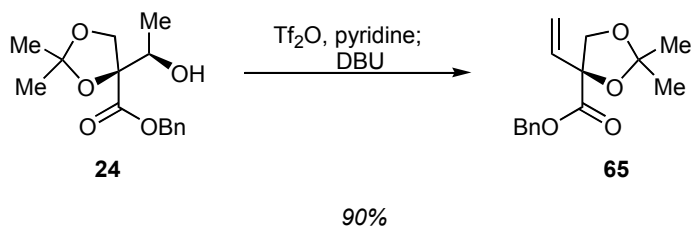

**Ester 65.** Trifluoromethanesulfonic anhydride (16.7 mL, 0.0991 mol) was added dropwise to a stirred solution of alcohol **24** (22.2 g, 0.0793 mol) and pyridine (16.2 mL, 0.198 mol) in dichloromethane (400 mL) at  $-78$  °C. The reaction mixture was stirred 10 min and then warmed to  $0$  °C. After 15 min, DBU (59.2 mL, 0.396 mol) was introduced, and the resulting solution was left at room temperature for 2 h before quenching with aqueous HCl (1 L of 1 M solution). Phases were separated, and the organic phase was

washed with aqueous HCl (1 M solution), water, and saturated aqueous solution of NaHCO<sub>3</sub>, then dried over MgSO<sub>4</sub> and concentrated *in vacuo*. Purification by flash chromatography on silica gel (elution with dichloromethane) afforded 18.7 g (90% yield) of ester **65**.  $[\alpha]_D^{24.9} = -68.6$  ( $c = 1.5$ , CHCl<sub>3</sub>); <sup>1</sup>H NMR (500 MHz, CDCl<sub>3</sub>) δ 1.44 (s, 3H), 1.47 (s, 3H), 3.87 (d, 1H,  $J = 9.0$  Hz), 4.47 (d, 1H,  $J = 9.0$  Hz), 5.17 (d, 1H,  $J = 12.5$  Hz), 5.25 (d, 1H,  $J = 12.5$  Hz), 5.26 (d, 1H,  $J = 10.5$  Hz), 5.51 (d, 1H,  $J = 17.5$  Hz), 6.03 (dd, 1H,  $J = 17.0, 11.0$  Hz), 7.30-7.39 (m, 5H); <sup>13</sup>C NMR (125 MHz, CDCl<sub>3</sub>) δ 25.9, 26.0, 67.3, 72.8, 84.3, 111.8, 116.6, 128.2, 128.4, 128.5, 134.8, 135.3, 171.7; HRMS (ESI) calculated for C<sub>15</sub>H<sub>18</sub>O<sub>4</sub>Na [M+Na]<sup>+</sup> 285.1103, found 285.1095.

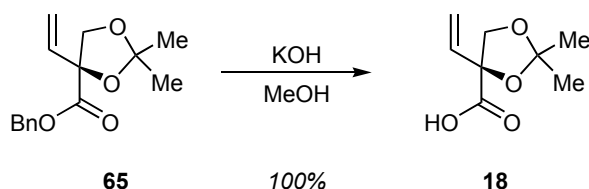

**Acid 18.** Ester **65** (6.86 g, 0.0262 mol) was treated with a solution of KOH (7.35 g, 0.13 mol) in methanol (130 mL) at room temperature. After 40 min, the reaction mixture was concentrated *in vacuo*. The residue was dissolved in water (250 mL) and washed twice with diethyl ether. The aqueous solution was cooled to 0 °C and acidified with concentrated aqueous solution of HCl (final pH ~ 5). The resulting solution was saturated with NaCl and extracted twice with ethyl acetate. The combined organic layers were washed twice with brine, dried over MgSO<sub>4</sub> and concentrated *in vacuo* to afford 4.5 g (100% yield) of acid **18**.  $[\alpha]_D^{25.0} = -81.0$  ( $c = 3.0$ , CHCl<sub>3</sub>); <sup>1</sup>H NMR (500 MHz, CDCl<sub>3</sub>) δ 1.44 (s, 3H), 1.54 (s, 3H), 3.90 (d, 1H,  $J = 9.0$  Hz), 4.50 (d, 1H,  $J = 9.0$  Hz), 5.30 (d, 1H,  $J = 10.5$  Hz), 5.57 (d, 1H,  $J = 17.0$  Hz), 6.04 (dd, 1H,  $J = 17.0, 11.0$  Hz); <sup>13</sup>C NMR



(125 MHz, CDCl<sub>3</sub>)  $\delta$  25.5, 26.1, 72.9, 84.2, 112.3, 117.1, 134.0, 175.9; HRMS (ESI) calculated for C<sub>3</sub>H<sub>12</sub>O<sub>4</sub>Na [M+Na]<sup>+</sup> 195.0633, found 195.0642.

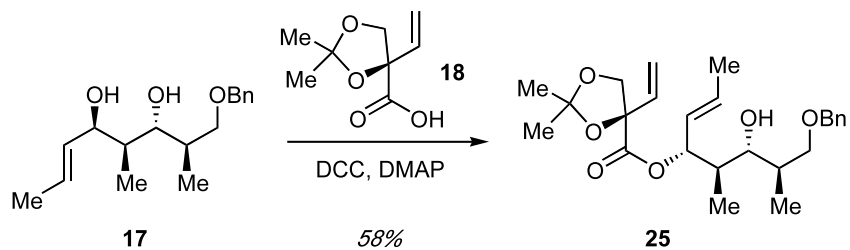

**Ester 25.** A solution of acid **18** (5.5 g, 0.032 mol), diol **17** (17.4 g, 0.063 mol) and DMAP (0.78 g, 0.0064 mol) in dichloromethane (160 mL) was treated with DCC (7.92 g, 0.0384 mol) at room temperature. After 1 h, the reaction mixture was filtered, solids were washed with dichloromethane, and the resulting solution was concentrated *in vacuo*. Purification by flash chromatography on silica gel (elution with hexanes:ethyl acetate 9:1) afforded 8 g (58% yield) of ester **25** (excess diol can be recovered upon elution with hexanes:ethyl acetate 1:1).  $[\alpha]_D^{24.4} = -23.8$  ( $c = 1.7$ , CHCl<sub>3</sub>); <sup>1</sup>H NMR (500 MHz, CDCl<sub>3</sub>)  $\delta$  0.92 (d, 3H,  $J = 7.0$  Hz), 1.05 (d, 3H,  $J = 7.0$  Hz), 1.44 (s, 3H), 1.47 (s, 3H), 1.69 (d, 3H,  $J = 6.0$  Hz), 1.84 (m, 1H), 2.00 (m, 1H), 3.16 (d, 1H,  $J = 6.5$  Hz), 3.23 (m, 1H), 3.53 (dd, 1H,  $J = 5.0, 1.0$  Hz), 3.84 (d, 1H,  $J = 8.5$  Hz), 4.48 (m, 3H), 5.24 (d, 2H,  $J = 11.0$  Hz), 5.47 (m, 1H), 5.52 (d, 1H,  $J = 17.0$ ), 5.71 (m, 2H), 6.02 (dd, 1H,  $J = 17.0, 10.5$  Hz), 7.27-7.35 (m, 5H); <sup>13</sup>C NMR (125 MHz, CDCl<sub>3</sub>)  $\delta$  10.9, 15.9, 17.8, 26.00, 26.02, 34.8, 41.4, 72.6, 72.7, 73.4, 75.8, 76.8, 84.5, 111.7, 116.4, 127.57, 127.65, 128.0, 128.4, 128.9, 135.2, 138.1, 171.5; HRMS (ESI) calculated for C<sub>25</sub>H<sub>36</sub>O<sub>6</sub>Na [M+Na]<sup>+</sup> 455.2410, found 455.2408.

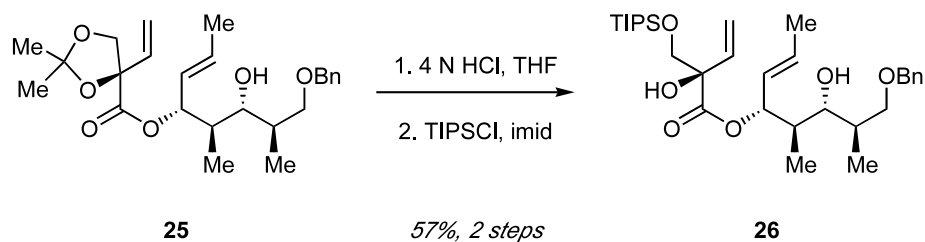

**Silyl ether 26.** Ester **25** (7.1 g, 0.0164 mol) was treated with a mixture of aqueous HCl (4 M solution, 165 mL) and THF (165 mL). The reaction mixture was stirred 6 h at room temperature and quenched by portionwise addition of solid NaHCO<sub>3</sub> (until neutralized). The resulting solution was extracted twice with ethyl acetate. The combined organic layers were washed with saturated aqueous solution of NaHCO<sub>3</sub>, dried over MgSO<sub>4</sub>, and concentrated *in vacuo*. The resulting crude triol, imidazole (2.9 g, 0.0427 mol) and DMAP (0.2 g, 0.00164 mol) were dissolved in dichloromethane (17 mL) and treated dropwise with TIPSCl (4.5 mL, 0.0214 mol) at 0 °C. The reaction mixture was stirred for 2 days at room temperature, diluted with diethyl ether, washed with brine, dried over MgSO<sub>4</sub> and concentrated *in vacuo*. Purification by flash chromatography on silica gel (elution with hexanes:ethyl acetate 9:1) afforded 5.2 g (58% yield over two steps) of silyl ether **26**.  $[\alpha]_{\text{D}}^{23.2} = -10.2$  ( $c = 2.0$ , CHCl<sub>3</sub>); <sup>1</sup>H NMR (500 MHz, CDCl<sub>3</sub>)  $\delta$  0.93 (d, 3H,  $J = 7.0$  Hz), 1.06 (m, 24H), 1.69 (d, 3H,  $J = 6.5$  Hz), 1.86 (m, 1H), 1.98 (m, 1H), 3.04 (d, 1H,  $J = 6.5$  Hz), 3.27 (m, 1H), 3.49 (dd, 1H,  $J = 9.0, 6.0$  Hz), 3.52 (s, 1H), 3.56 (dd, 1H,  $J = 9.0, 5.0$  Hz), 3.61 (d, 1H,  $J = 10.0$  Hz), 4.07 (d, 1H,  $J = 9.5$  Hz), 4.46 (d, 1H,  $J = 12.0$  Hz), 4.49 (d, 1H,  $J = 12.0$  Hz), 5.26 (d, 1H,  $J = 10.5$  Hz), 5.48 (ddd, 1H,  $J = 16.0, 6.0, 1.0$  Hz), 5.60 (d, 1H,  $J = 17.0$  Hz), 5.66 (m, 1H), 5.70 (m, 1H), 5.92 (dd, 1H,  $J = 17.0, 11.0$  Hz), 7.26-7.36 (m, 5H); <sup>13</sup>C NMR (125 MHz, CDCl<sub>3</sub>)  $\delta$  10.8, 12.0, 16.0, 17.8, 17.89, 17.94, 35.0, 41.6, 69.5, 72.2, 73.4, 76.1, 76.7, 79.2, 117.1, 127.5, 127.6, 128.0, 128.4,

128.9, 134.7, 138.3, 172.9; HRMS (ESI) calculated for  $C_{31}H_{52}O_6NaSi$   $[M+Na]^+$  571.3431, found 571.3427.

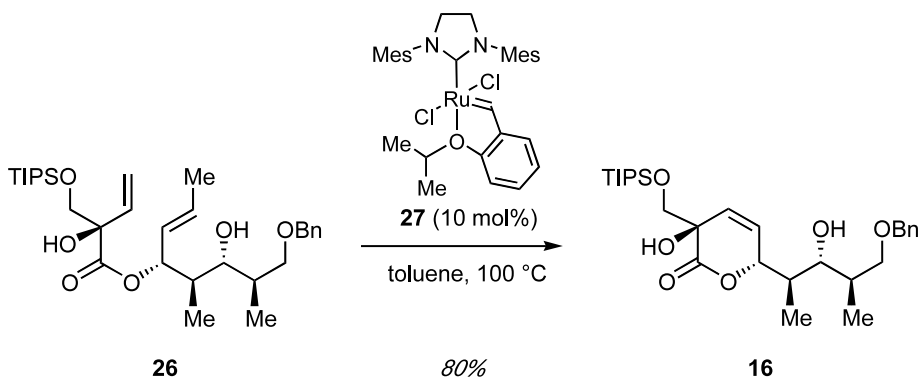

**Lactone 16.** Silyl ether **26** (5.1 g, 0.0093 mol) and Hoveyda-Grubbs catalyst **27** (0.6 g, 0.00094 mol) were dissolved in toluene (100 mL) and heated at 100 °C for 2 h. Purification by flash chromatography on silica gel (elution with hexanes:ethyl acetate 1:1) afforded 3.8 g (80% yield) of lactone **16**.  $[\alpha]_D^{24.7} = -19.3$  ( $c = 0.7$ ,  $CHCl_3$ );  $^1H$  NMR (500 MHz,  $CDCl_3$ )  $\delta$  0.82 (d, 3H,  $J = 7.0$  Hz), 1.04 (d, 18H,  $J = 6.0$  Hz), 1.07 (m, 3H), 1.15 (d, 3H,  $J = 7.0$  Hz), 1.80 (m, 1H), 1.95 (m, 1H), 2.93 (d, 1H,  $J = 7.5$  Hz), 3.39 (s, 1H), 3.53 (dd, 1H,  $J = 9.5, 4.0$  Hz), 3.61 (m, 2H), 3.82 (d, 1H,  $J = 9.5$  Hz), 3.84 (d, 1H,  $J = 9.5$  Hz), 4.47 (d, 1H,  $J = 12.0$  Hz), 4.51 (d, 1H,  $J = 12.0$  Hz), 5.60 (m, 1H), 5.85 (q, 1H,  $J = 11.0$  Hz), 7.28-7.38 (m, 5H);  $^{13}C$  NMR (125 MHz,  $CDCl_3$ )  $\delta$  10.5, 11.9, 16.1, 17.9, 30.3, 34.5, 42.0, 69.2, 69.4, 71.9, 73.6, 75.5, 80.8, 126.1, 127.7, 127.8, 128.5, 130.1, 137.8, 171.2; HRMS (ESI) calculated for  $C_{28}H_{47}O_6Si$   $[M+H]^+$  507.3142, found 507.3120.

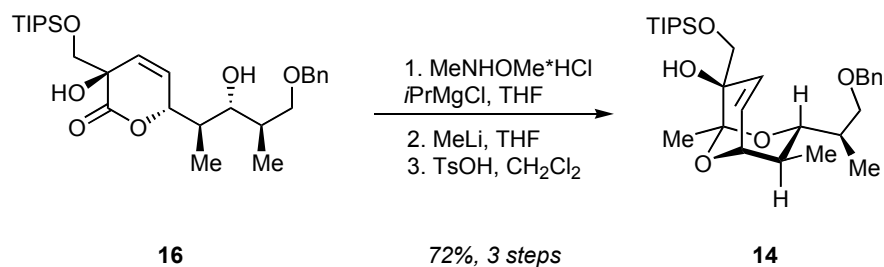

**Bicyclic acetal 14.** A stirred mixture of lactone **16** (3.6 g, 0.0071 mol) and *N,O*-dimethylhydroxylamine hydrochloride (2.77 g, 0.0284 mol) in THF (15 mL) was treated dropwise with isopropylmagnesium chloride (28.5 mL of 2 M solution in THF, 0.057 mol) at -15 °C. After 15 min, the resulting solution was warmed to room temperature, stirred for 1.5 h and quenched with saturated aqueous solution of NH<sub>4</sub>Cl. Phases were separated, and the aqueous phase was extracted with diethyl ether. The combined organic layers were washed with brine, dried over MgSO<sub>4</sub>, and concentrated *in vacuo*. The resulting crude amide was dissolved in THF (4 mL) and treated dropwise with MeLi (21.5 mL of 1.5 M solution in diethyl ether, 0.032 mol) at -78 °C. After 10 min, the reaction mixture was warmed to 0 °C, stirred for 15 min, and then quenched with saturated aqueous solution of NH<sub>4</sub>Cl. Phases were separated, and the aqueous phase was extracted with diethyl ether. The combined organic layers were washed with brine, dried over MgSO<sub>4</sub>, and concentrated *in vacuo*. The resulting crude hemiketal was dissolved in dichloromethane (70 mL) and treated with *p*-toluenesulfonic acid hydrate (0.095 g, 0.0005 mol) at room temperature. After 2 h, the reaction was quenched with triethylamine (0.35 mL) and concentrated *in vacuo*. Purification by flash chromatography on silica gel (elution with hexanes:ethyl acetate 4:1) afforded 2.6 g (72% yield over three steps) of bicyclic acetal **14**.  $[\alpha]_{\text{D}}^{25.0} = +73.9$  ( $c = 0.7$ , CHCl<sub>3</sub>); <sup>1</sup>H NMR (500 MHz, CDCl<sub>3</sub>)  $\delta$  0.74 (d, 3H,  $J = 7.0$  Hz), 1.01 (d, 3H,  $J = 7.0$  Hz), 1.08 (d, 18H,  $J =$

6.0 Hz), 1.12 (m, 3H), 1.41 (s, 3H), 2.00 (m, 1H), 2.24 (m, 1H), 3.11 (s, 1H), 3.27 (dd, 1H,  $J = 9.5, 7.0$  Hz), 3.51 (dd, 1H,  $J = 11.5, 1.5$  Hz), 3.57 (d, 1H,  $J = 10.0$  Hz), 3.71 (dd, 1H,  $J = 9.5, 6.0$  Hz), 3.78 (d, 1H,  $J = 10.0$  Hz), 4.26 (t, 1H,  $J = 4.5$  Hz), 4.47 (d, 1H,  $J = 12.0$  Hz), 4.50 (d, 1H,  $J = 12.0$  Hz), 5.99 (dd, 1H,  $J = 10.0, 4.0$  Hz), 6.17 (d, 1H,  $J = 10.0$  Hz), 7.27 (m, 1H), 7.33 (m, 4H);  $^{13}\text{C}$  NMR (125 MHz,  $\text{CDCl}_3$ )  $\delta$  11.9, 12.8, 15.9, 18.0, 24.1, 33.1, 34.2, 65.1, 69.2, 71.3, 71.6, 73.1, 76.8, 99.9, 126.6, 127.4, 128.3, 131.3, 138.7; HRMS (ESI) calculated for  $\text{C}_{29}\text{H}_{49}\text{O}_5\text{Si}$   $[\text{M}+\text{H}]^+$  505.3349, found 505.3350.

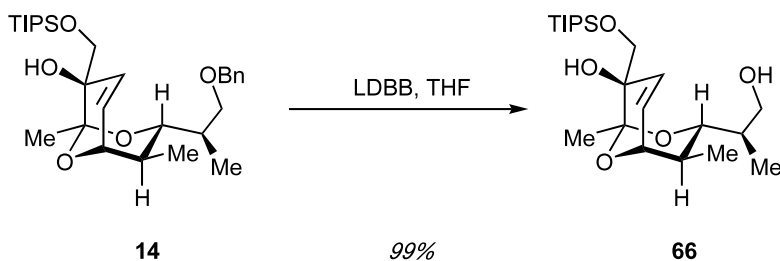

**Alcohol 66.** Lithium wire (0.03 g, 4.4 mmol) and 4,4'-di-*tert*-butylbiphenyl (1.17 g, 4.4 mmol) were sonicated in THF (22 mL) for 2 h at room temperature under positive pressure of argon. The resulting dark green solution was cooled to  $-78$  °C and cannulated to a cold ( $-78$  °C) solution of bicyclic acetal **14** (0.222 g, 0.44 mmol). The resulting mixture was stirred for 30 min, quenched with saturated aqueous solution of  $\text{NH}_4\text{Cl}$ , and warmed up to room temperature. Phases were separated, and the aqueous phase was extracted with diethyl ether. The combined organic layers were washed with brine, dried over  $\text{MgSO}_4$  and concentrated *in vacuo*. Purification by flash chromatography on silica gel (elution with hexanes:diethyl ether 1:1) afforded 0.18 g (99% yield) of alcohol **66**.  $[\alpha]_D^{25.2} = +93.8$  ( $c = 0.5$ ,  $\text{CHCl}_3$ );  $^1\text{H}$  NMR (500 MHz,  $\text{CDCl}_3$ )  $\delta$  0.72 (d, 3H,  $J = 7.0$  Hz), 1.10 (d, 18H,  $J = 6.0$  Hz), 1.12 (d, 3H,  $J = 7.5$  Hz), 1.13 (m, 3H), 1.45 (s, 3H), 1.76 (m, 1H), 2.26 (m, 1H), 2.56 (s, 1H), 3.14 (s, 1H), 3.55 (d, 1H,  $J = 10.0$  Hz), 3.58 (d, 1H,  $J =$

10.0 Hz), 3.63 (d, 1H,  $J = 10.5$  Hz), 3.79 (d, 1H,  $J = 10.0$  Hz), 3.94 (dd, 1H,  $J = 11.0, 3.0$  Hz), 4.31 (t, 1H,  $J = 4.5$  Hz), 6.00 (dd, 1H,  $J = 10.0, 4.0$  Hz), 6.18 (d, 1H,  $J = 10.0$  Hz);  $^{13}\text{C}$  NMR (125 MHz,  $\text{CDCl}_3$ )  $\delta$  11.8, 12.7, 15.2, 18.0, 24.4, 33.6, 34.3, 63.8, 65.0, 69.0, 71.4, 79.4, 100.4, 126.5, 131.3; HRMS (ESI) calculated for  $\text{C}_{22}\text{H}_{43}\text{O}_5\text{Si}$   $[\text{M}+\text{Na}]^+$  415.2880, found 415.2891.

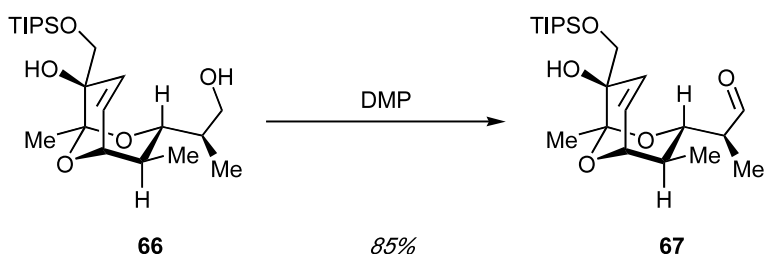

**Aldehyde 67.** A solution of alcohol **66** (0.67 g, 1.62 mmol) in dichloromethane (10 mL) was treated with Dess-Martin periodinane (0.89 g, 2.1 mmol) at room temperature. After 1 h, the reaction was quenched with saturated aqueous solution of  $\text{Na}_2\text{S}_2\text{O}_3$  and saturated aqueous solution of  $\text{NaHCO}_3$  and stirred for 15 min. Phases were separated, and the aqueous phase was extracted with diethyl ether. The combined organic layers were dried over  $\text{MgSO}_4$  and concentrated *in vacuo*. Purification by flash chromatography on silica gel (elution with hexanes:ethyl acetate 4:1) afforded 0.57 g (85% yield) of aldehyde **67**.  $[\alpha]_D^{25.4} = +100.6$  ( $c = 0.7$ ,  $\text{CHCl}_3$ );  $^1\text{H}$  NMR (500 MHz,  $\text{CDCl}_3$ )  $\delta$  0.77 (d, 3H,  $J = 7.0$  Hz), 1.08 (d, 18H,  $J = 5.5$  Hz), 1.13 (m, 3H), 1.17 (d, 3H,  $J = 7.0$  Hz), 1.41 (s, 3H), 2.24 (m, 1H), 2.40 (m, 1H), 3.11 (s, 1H), 3.58 (d, 1H,  $J = 10.0$  Hz), 3.73 (dd, 1H,  $J = 11.0, 1.5$  Hz), 3.81 (d, 1H,  $J = 10.0$  Hz), 4.31 (t, 1H,  $J = 4.5$  Hz), 6.00 (dd, 1H,  $J = 10.5, 4.0$  Hz), 6.19 (d, 1H,  $J = 10.5$  Hz), 9.78 (d, 1H,  $J = 2.0$  Hz);  $^{13}\text{C}$  NMR (125 MHz,  $\text{CDCl}_3$ )  $\delta$  11.6, 11.8, 12.6, 18.0, 24.0, 33.7, 46.7, 65.1, 69.0, 71.1, 76.5, 100.3, 126.1, 131.6, 204.2; HRMS (ESI) calculated for  $\text{C}_{22}\text{H}_{41}\text{O}_5\text{Si}$   $[\text{M}+\text{H}]^+$  413.2723, found 413.2718.

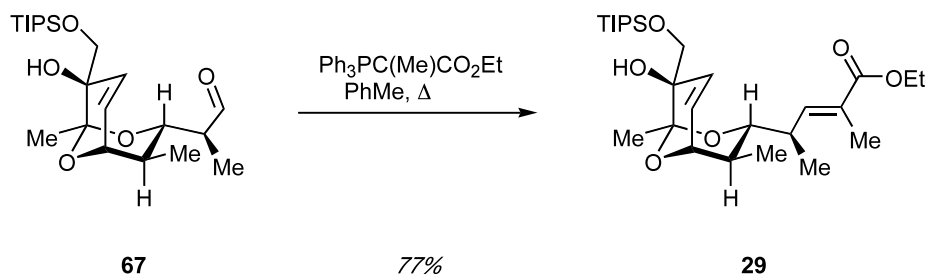

**Ester 29.** A solution of aldehyde **67** (0.175 g, 0.423 mmol) and (carbethoxyethylidene)triphenylphosphorane (0.766 g, 2.12 mmol) in toluene (4.5 mL) was heated at 110 °C for 5 h. Purification by flash chromatography on silica gel (elution with hexanes:ethyl acetate 9:1) afforded 0.162 g (77% yield) of ester **29**.  $[\alpha]_D^{25.7} = +60.4$  ( $c = 0.4$ ,  $\text{CHCl}_3$ );  $^1\text{H NMR}$  (500 MHz,  $\text{CDCl}_3$ )  $\delta$  0.68 (d, 3H,  $J = 7.0$  Hz), 1.05 (d, 3H,  $J = 7.0$  Hz), 1.09 (d, 18H,  $J = 5.5$  Hz), 1.14 (m, 3H), 1.30 (t, 3H,  $J = 7.0$  Hz), 1.48 (s, 3H), 1.83 (d, 3H,  $J = 1.5$  Hz), 1.86 (m, 1H), 2.65 (m, 1H), 3.12 (s, 1H), 3.51 (d, 1H,  $J = 10.5$  Hz), 3.59 (d, 1H,  $J = 10.0$  Hz), 3.82 (d, 1H,  $J = 10.0$  Hz), 4.20 (m, 2H), 4.23 (t, 1H,  $J = 4.0$  Hz), 6.00 (dd, 1H,  $J = 10.5, 4.0$  Hz), 6.17 (d, 1H,  $J = 10.0$  Hz), 6.89 (d, 1H,  $J = 10.0$  Hz);  $^{13}\text{C NMR}$  (125 MHz,  $\text{CDCl}_3$ )  $\delta$  11.9, 12.5, 12.7, 14.3, 16.6, 18.0, 24.0, 34.1, 34.2, 60.5, 65.2, 69.2, 71.2, 76.9, 100.0, 126.6, 127.7, 131.3, 142.0, 168.1; HRMS (ESI) calculated for  $\text{C}_{27}\text{H}_{48}\text{O}_6\text{NaSi}$   $[\text{M}+\text{Na}]^+$  519.3118, found 519.3121.

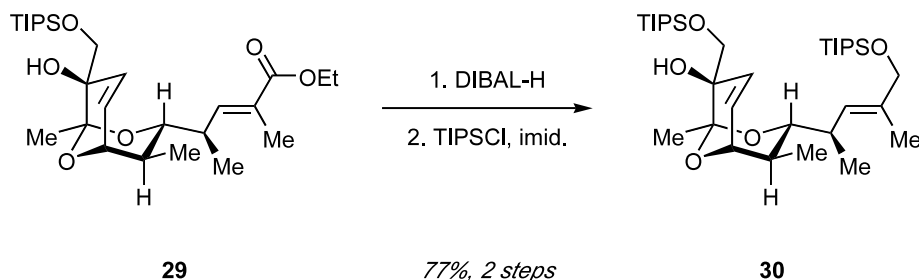

**Silyl ether 30.** A stirred solution of ester **29** (0.42 g, 0.847 mmol) in dichloromethane (8.5 mL) was treated with DIBAL-H (3.4 mL of 1 M solution in toluene, 3.4 mmol) at -

78 °C. After 1 h, the reaction was quenched with brine (1 mL). The resulting mixture was warmed to room temperature, stirred for 1 h, diluted with diethyl ether and treated with Na<sub>2</sub>SO<sub>4</sub>. The solution was decanted, and the solids were rinsed with diethyl ether. The combined solutions were dried over MgSO<sub>4</sub> and concentrated *in vacuo*. A solution of the resulting crude alcohol, imidazole (0.2 g, 3 mmol) and DMAP (0.018 g, 0.15 mmol) in dichloromethane (1.5 mL) was treated dropwise with TIPSCl (0.32 mL, 1.5 mmol). The reaction mixture was stirred overnight at room temperature, diluted with diethyl ether, washed with brine, dried over MgSO<sub>4</sub> and concentrated *in vacuo*. Purification by flash chromatography on silica gel (elution with hexanes:ethyl acetate 20:1) afforded 0.39 g (75% yield over two steps) of silyl ether **30**.  $[\alpha]^{25.9}_D = +59.1$  ( $c = 0.7$ , CHCl<sub>3</sub>); <sup>1</sup>H NMR (500 MHz, CDCl<sub>3</sub>) δ 0.66 (d, 3H,  $J = 7.0$  Hz), 0.98 (d, 3H,  $J = 7.0$  Hz), 1.08 (m, 42H), 1.43 (s, 3H), 1.59 (s, 3H), 1.92 (m, 1H), 2.55 (m, 1H), 3.09 (s, 1H), 3.44 (dd, 1H,  $J = 10.5, 2.0$  Hz), 3.59 (d, 1H,  $J = 10.0$  Hz), 3.81 (d, 1H,  $J = 10.0$  Hz), 4.09 (s, 2H), 4.19 (t, 1H,  $J = 4.5$  Hz), 5.58 (d, 1H,  $J = 10.0$  Hz), 5.99 (dd, 1H,  $J = 10.5, 4.5$  Hz), 6.15 (d, 1H,  $J = 10.5$  Hz); <sup>13</sup>C NMR (125 MHz, CDCl<sub>3</sub>) δ 11.8, 12.0, 12.7, 13.4, 17.7, 18.0, 18.1, 23.9, 32.9, 33.7, 65.2, 68.5, 69.3, 71.3, 77.4, 99.8, 124.2, 127.1, 131.0, 134.3; HRMS (ESI) calculated for C<sub>34</sub>H<sub>67</sub>O<sub>5</sub>Si<sub>2</sub> [M+H]<sup>+</sup> 611.4527, found 611.4528.

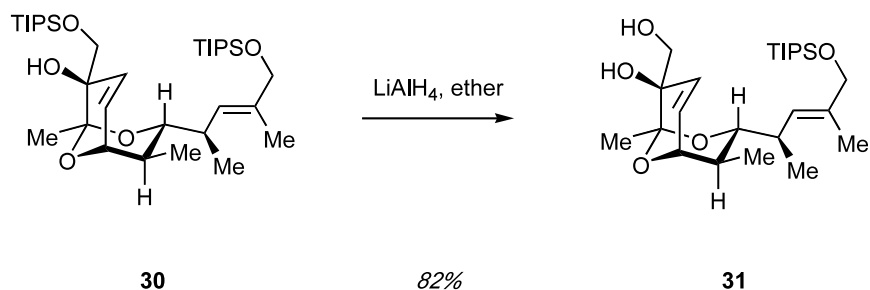



**Diol 31.** A stirred solution of silyl ether **30** (0.247 g, 0.404 mmol) in THF (3 mL) was treated dropwise with LiAlH<sub>4</sub> (0.6 mL of 1 M solution in THF, 0.6 mmol) at 0 °C. After 2 h at room temperature, the reaction was quenched with brine (0.22 mL), stirred 20 min, diluted with diethyl ether and treated with Na<sub>2</sub>SO<sub>4</sub>. The solution was decanted and solids were rinsed with diethyl ether. The combined solutions were dried over MgSO<sub>4</sub> and concentrated *in vacuo*. Purification by flash chromatography on silica gel (elution with hexanes:ethyl acetate 1:1) afforded 0.15 g (82% yield) of diol **31**. [α]<sup>23.7</sup><sub>D</sub> = +70.7 (*c* = 1.2, CHCl<sub>3</sub>); <sup>1</sup>H NMR (500 MHz, CDCl<sub>3</sub>) δ 0.67 (d, 3H, *J* = 7.0 Hz), 0.98 (d, 3H, *J* = 7.0 Hz), 1.07 (d, 18H, *J* = 6.0 Hz), 1.10 (m, 3H), 1.42 (s, 3H), 1.59 (s, 3H), 1.94 (m, 1H), 2.21 (s, 1H), 2.23 (m, 1H), 2.55 (m, 1H), 3.52 (m, 2H), 3.72 (dd, 1H, *J* = 12.0, 4.5 Hz), 4.09 (s, 2H), 4.16 (t, 1H, *J* = 4.5 Hz), 5.58 (d, 1H, *J* = 10.0 Hz), 6.01 (dd, 1H, *J* = 10.5, 4.0 Hz), 6.28 (d, 1H, *J* = 10.5 Hz); <sup>13</sup>C NMR (125 MHz, CDCl<sub>3</sub>) δ 12.0, 12.7, 13.5, 17.6, 18.1, 23.9, 32.8, 33.8, 64.4, 68.3, 69.6, 71.6, 77.6, 100.3, 123.8, 128.2, 130.8, 134.5; HRMS (ESI) calculated for C<sub>25</sub>H<sub>47</sub>O<sub>5</sub>Si [M+H]<sup>+</sup> 455.3193, found 455.3188.

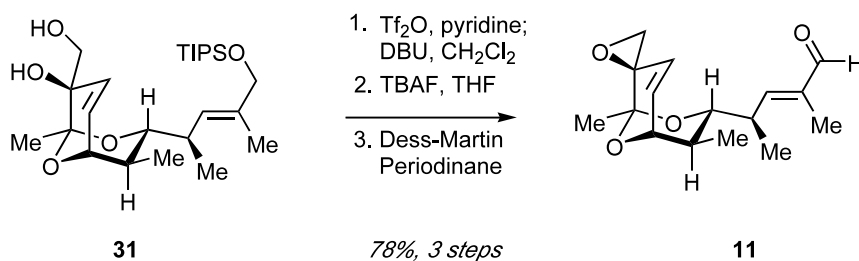

**Streptal (11).** Trifluoromethanesulfonic anhydride (0.067 mL, 0.4 mmol) was added dropwise to a stirred solution of diol **31** (0.14 g, 0.308 mmol) and pyridine (0.065 mL, 0.8 mmol) in dichloromethane (3 mL) at -78 °C. The mixture was warmed up to 0 °C,

stirred for 15 min, and treated with DBU (0.24 mL, 1.6 mmol). The resulting solution was stirred for 1 h, diluted with diethyl ether, and washed with aqueous HCl (1 M solution), water, and saturated aqueous solution of NaHCO<sub>3</sub>. The organic phase was dried over MgSO<sub>4</sub> and concentrated *in vacuo*. A solution of the resulting crude epoxide in THF (2 mL) was treated with TBAF (0.6 mL of 1 M solution in THF, 0.6 mmol) at 0°C. After 2 h, the reaction mixture was quenched with saturated aqueous solution of NH<sub>4</sub>Cl and extracted twice with diethyl ether. The combined organic extracts were washed with brine, dried over MgSO<sub>4</sub> and concentrated *in vacuo*. The resulting crude alcohol was dissolved in dichloromethane (3 mL) and treated with solid NaHCO<sub>3</sub> (0.144 g, 1.72 mmol). The resulting suspension was treated with Dess-Martin periodinane (0.182 g, 0.43 mmol), stirred for 1 h at room temperature, and quenched with saturated aqueous solution of Na<sub>2</sub>S<sub>2</sub>O<sub>3</sub> and saturated aqueous solution of NaHCO<sub>3</sub>. After 15 min, the reaction mixture was extracted twice with diethyl ether. The combined organic extracts were washed with brine, dried over MgSO<sub>4</sub> and concentrated *in vacuo*. Purification by flash chromatography on silica gel (elution with hexanes:ethyl acetate 5:1) afforded 0.067 g (78% yield over three steps) of streptal (**11**).  $[\alpha]_{\text{D}}^{24.3} = +196.1$  ( $c = 0.8$ , CHCl<sub>3</sub>); <sup>1</sup>H NMR (500 MHz, CDCl<sub>3</sub>) δ 0.70 (d, 3H,  $J = 7.0$  Hz), 1.09 (d, 3H,  $J = 7.0$  Hz), 1.23 (s, 3H), 1.74 (s, 3H), 1.90 (m, 1H), 2.82 (d, 1H,  $J = 5.0$  Hz), 2.88 (m, 1H), 2.98 (d, 1H,  $J = 5.0$  Hz), 3.68 (dd, 1H,  $J = 10.5, 2$  Hz), 4.36 (t, 1H,  $J = 4.5$  Hz), 5.63 (d, 1H,  $J = 10.0$  Hz), 6.34 (dd, 1H,  $J = 10.5, 4.5$  Hz), 6.66 (d, 1H,  $J = 10.0$  Hz), 9.43 (s, 1H); <sup>13</sup>C NMR (125 MHz, CDCl<sub>3</sub>) δ 9.2, 12.5, 16.6, 22.2, 33.9, 35.2, 50.5, 54.9, 71.3, 75.8, 98.9, 130.6, 133.6, 139.1, 154.1, 195.4; HRMS (ESI) calculated for C<sub>16</sub>H<sub>23</sub>O<sub>4</sub> [M+H]<sup>+</sup> 279.1596, found 279.1602.

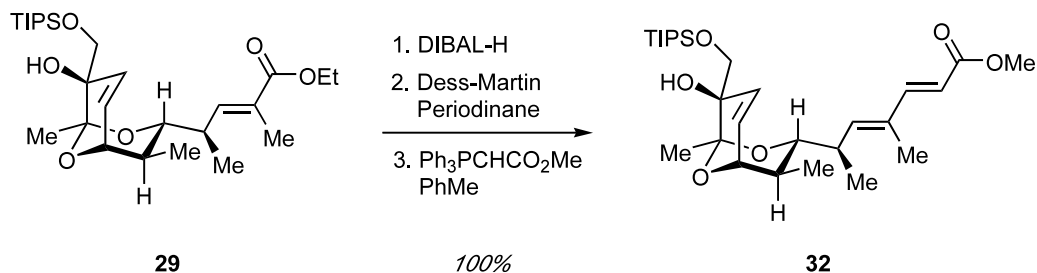

**Ester 32.** A stirred solution of ester **29** (0.063 g, 0.127 mmol) in dichloromethane (2 mL) was treated with DIBAL-H (0.6 mL of 1 M solution in toluene, 0.6 mmol) at  $-78^\circ\text{C}$ . After 1 hr reaction was quenched with ethyl acetate (0.2 mL) followed by brine (0.15 mL). The resulting mixture was warmed up to room temperature, stirred 30 min and diluted with diethyl ether. Solution was decanted, and solids were rinsed with diethyl ether. Combined solutions were dried over  $\text{MgSO}_4$ , concentrated *in vacuo* and azeotroped with toluene. A stirred mixture of the resulting alcohol and solid  $\text{NaHCO}_3$  (0.027 g, 0.32 mmol) in dichloromethane (1.5 mL) was treated with Dess-Martin periodinane (0.068 g, 0.16 mmol). After 30 min at room temperature (carboxymethylidene)triphenylphosphorane (0.2 g, 0.605 mmol) was added, and reaction mixture was left overnight and concentrated *in vacuo*. Purification by flash chromatography on silica gel (elution with hexanes:ethyl acetate 4:1) afforded 0.065 g (100% over two steps) of ester **32**.  $[\alpha]^{24.1}_{\text{D}} = +40.6$  ( $c = 0.45$ ,  $\text{CHCl}_3$ );  $^1\text{H NMR}$  (500 MHz,  $\text{CDCl}_3$ ) d 0.66 (d, 3H,  $J = 7.0$  Hz), 1.03 (d, 3H,  $J = 7.0$  Hz), 1.09 (d, 18H,  $J = 6.0$  Hz), 1.14 (m, 3H), 1.46 (s, 3H), 1.76 (s, 3H), 1.83 (m, 1H), 2.68 (m, 1H), 3.10 (s, 1H), 3.50 (d, 1H,  $J = 10.0$  Hz), 3.58 (d, 1H,  $J = 10.0$  Hz), 3.75 (s, 3H), 3.81 (d, 1H,  $J = 10.0$  Hz), 4.20 (t, 1H,  $J = 4.5$  Hz), 5.78 (d, 1H,  $J = 15.5$  Hz), 5.98 (dd, 1H,  $J = 10.5$ , 4.5 Hz), 6.06 (d, 1H,  $J = 10.0$  Hz), 6.15 (d, 1H,  $J = 10.5$  Hz), 7.33 (d, 1H,  $J = 15.5$  Hz);  $^{13}\text{C NMR}$  (125

MHz, CDCl<sub>3</sub>) δ 11.9, 12.3, 12.7, 17.2, 18.0, 24.1, 34.06, 34.08, 51.5, 65.2, 69.2, 71.1, 77.1, 100.0, 115.5, 126.7, 131.2, 132.4, 142.3, 149.9, 167.8; HRMS (ESI) calculated for C<sub>28</sub>H<sub>49</sub>O<sub>6</sub>Si [M+H]<sup>+</sup> 509.3298, found 509.3310.

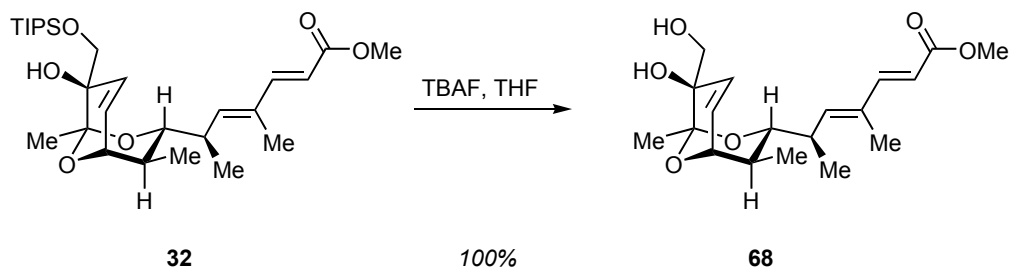

**Diol 68.** A stirred solution of ester **32** (0.065 g, 0.128 mmol) in THF (1.5 mL) was treated with TBAF (0.14 mL of 1 M solution in THF, 0.14 mmol) at 0 °C. After 15 min reaction was quenched with saturated aqueous NH<sub>4</sub>Cl and extracted with ethyl acetate. Organic layer was washed with brine, dried over MgSO<sub>4</sub> and concentrated *in vacuo*. Purification by flash chromatography on silica gel (elution with hexanes:ethyl acetate 1:1) afforded 0.045 g (100% yield) of diol **68**.  $[\alpha]_D^{23.8} = +61.9$  ( $c = 0.6$ , CHCl<sub>3</sub>); <sup>1</sup>H NMR (500 MHz, CDCl<sub>3</sub>) δ 0.67 (d, 3H,  $J = 7.0$  Hz), 1.03 (d, 3H,  $J = 6.5$  Hz), 1.45 (s, 3H), 1.76 (s, 3H), 1.83 (m, 1H), 2.30 (s, 1H), 2.47 (s, 1H), 2.68 (m, 1H), 3.48 (d, 1H,  $J = 12.0$  Hz), 3.55 (dd, 1H,  $J = 10.5, 1.5$  Hz), 3.61 (dd, 1H,  $J = 10.5, 1.5$  Hz), 3.75 (s, 3H), 4.17 (t, 1H,  $J = 4.5$  Hz), 5.79 (d, 1H,  $J = 16.0$  Hz), 6.00-6.06 (m, 2H), 6.30 (d, 1H,  $J = 10.5$  Hz), 7.34 (d, 1H,  $J = 15.5$  Hz); <sup>13</sup>C NMR (125 MHz, CDCl<sub>3</sub>) δ 12.3, 12.7, 17.0, 24.0, 34.0, 34.2, 51.5, 64.2, 69.6, 71.4, 77.2, 100.5, 115.6, 127.7, 130.9, 132.5, 142.1, 149.9, 167.9; HRMS (ESI) calculated for C<sub>19</sub>H<sub>29</sub>O<sub>6</sub> [M+H]<sup>+</sup> 353.1964, found 353.1960.

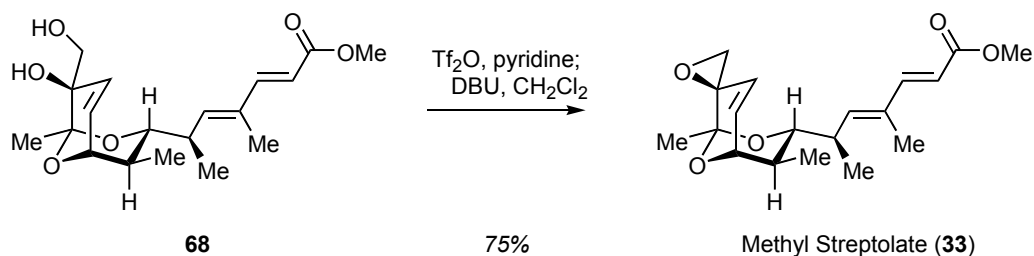

**Methyl streptolate 33.** Trifluoromethanesulfonic anhydride (0.017 mL, 0.102 mmol) was added dropwise to a stirred solution of diol **68** (0.03 g, 0.085 mmol) and pyridine (0.017 mL, 0.204 mmol) in dichloromethane (1 mL) at -78 °C. Reaction mixture was stirred 10 min and then warmed up to 0 °C. After 15 min DBU (0.06 mL, 0.408 mmol) was introduced, the resulting solution was left at room temperature for 1 hour and diluted with diethyl ether. The solution was washed with aqueous HCl (1 N solution), water and saturated aqueous NaHCO<sub>3</sub>, then dried over MgSO<sub>4</sub> and concentrated *in vacuo*. Purification by preparative TLC (development with hexanes:ethyl acetate 4:1) afforded 0.021 g (75% yield) of methyl streptolate **33**.  $[\alpha]_D^{26.0} = +130.9$  ( $c = 0.5$ , CHCl<sub>3</sub>); <sup>1</sup>H NMR (500 MHz, CDCl<sub>3</sub>) δ 0.68 (d, 3H,  $J = 7.0$  Hz), 1.02 (d, 3H,  $J = 7.0$  Hz), 1.22 (s, 3H), 1.77 (s, 3H), 1.93 (m, 1H), 2.72 (m, 1H), 2.80 (d, 1H,  $J = 5.0$  Hz), 2.97 (d, 1H,  $J = 5.0$  Hz), 3.61 (dd, 1H,  $J = 10.5, 2$  Hz), 3.75 (s, 3H), 4.34 (t, 1H,  $J = 4.5$  Hz), 5.61 (d, 1H,  $J = 10.5$  Hz), 5.79 (d, 1H,  $J = 15.5$  Hz), 6.06 (d, 1H,  $J = 10.0$  Hz), 6.34 (dd, 1H,  $J = 10.0, 5.0$  Hz), 7.35 (d, 1H,  $J = 15.5$  Hz); <sup>13</sup>C NMR (125 MHz, CDCl<sub>3</sub>) δ 12.2, 12.5, 17.2, 22.2, 33.7, 35.0, 50.6, 51.5, 55.0, 71.4, 76.2, 98.8, 115.6, 130.5, 132.5, 133.9, 142.1, 149.9, 167.9; HRMS (ESI) calculated for C<sub>19</sub>H<sub>27</sub>O<sub>5</sub> [M+H]<sup>+</sup> 335.1858, found 335.1861.

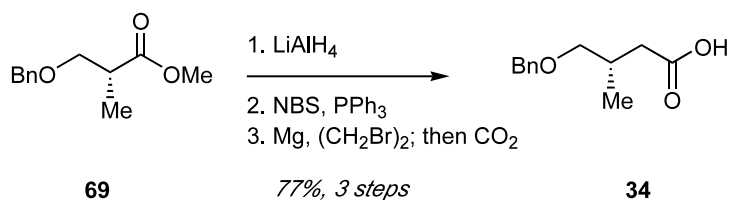

**Acid 34.** A stirred solution of known ester **69**<sup>3</sup> (5.1 g, 0.0245 mol) in diethyl ether (36 mL) was treated dropwise with LiAlH<sub>4</sub> (12 mL of 2 M solution in THF, 0.024 mol) at 0 °C. After 30 min at room temperature, the reaction was quenched with brine (9 mL) and treated with anhydrous Na<sub>2</sub>SO<sub>4</sub>. The resulting mixture was diluted with diethyl ether, the solution was decanted, and the solids were washed with diethyl ether. The combined solutions were dried over MgSO<sub>4</sub> and concentrated *in vacuo*. A mixture of the resulting crude alcohol and triphenylphosphine (8.39 g, 0.032 mol) was dissolved in dichloromethane (50 mL) and treated with NBS (5.7 g, 0.032 mol) at 0 °C. The reaction mixture was stirred overnight at room temperature, quenched with saturated aqueous NaHCO<sub>3</sub>, and extracted twice with hexanes. The combined organic extracts were dried over MgSO<sub>4</sub> and concentrated *in vacuo*. The residue was suspended in hexanes, filtered, and the solids were rinsed with additional portion of hexanes. The combined solutions were concentrated *in vacuo* to afford crude bromide. A solution of the product and 1,2-dibromoethane (0.1 mL) in THF (25 mL) was added slowly to a stirred suspension of magnesium powder (1.2 g, 0.05 mol) in THF (5 mL). The resulting suspension was refluxed for 30 min, cooled to room temperature, and poured into a slurry of dry ice in diethyl ether (~100 mL). The resulting suspension was warmed up to room temperature and diluted with hexanes. The solution was decanted, the solids were treated with

aqueous HCl (200 mL of 1 M solution), and the resulting solution was extracted twice with ethyl acetate. The combined organic extracts were washed with brine, dried over MgSO<sub>4</sub> and concentrated *in vacuo* to afford 3.93 g (77% yield over three steps) of known acid **34**.<sup>9</sup> [ $\alpha$ ]<sub>D</sub><sup>25.2</sup> = -4.4 (*c* = 0.6, CHCl<sub>3</sub>); <sup>1</sup>H NMR (500 MHz, CDCl<sub>3</sub>)  $\delta$  1.02 (d, 3H, *J* = 7.0 Hz), 2.22 (dd, 1H, *J* = 15.0, 7.5 Hz), 2.34 (m, 1H), 2.57 (dd, 1H, *J* = 15.0, 6.0 Hz), 3.32 (dd, 1H, *J* = 9.0, 7.0 Hz), 3.42 (dd, 1H, *J* = 9.0, 5.0 Hz), 4.51 (d, 1H, *J* = 12.0 Hz), 4.54 (d, 1H, *J* = 12.0 Hz), 7.27-7.37 (m, 5H); <sup>13</sup>C NMR (125 MHz, CDCl<sub>3</sub>)  $\delta$  16.8, 30.6, 38.5, 72.9, 74.6, 127.5, 128.3, 138.3, 179.2.

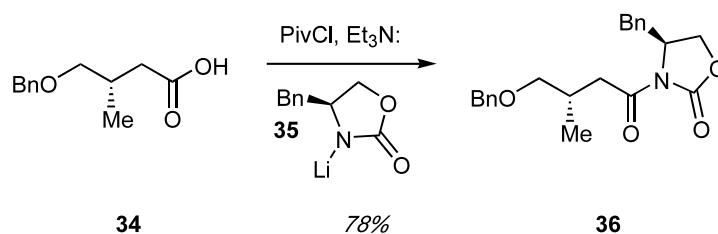

**Imide 36.** A stirred solution of acid **34** (3.85 g, 0.0185 mol) in THF (150 mL) was treated with triethylamine (3.35 mL, 0.024 mol) and pivaloyl chloride (2.5 mL, 0.0203 mol) at -78 °C. After 15 min, the reaction was warmed to 0 °C, stirred for 45 min, and the resulting solution of mixed anhydride was cooled to -78 °C. In a separate flask, a stirred solution of (4*S*)-4-benzyl-1,3-oxazolidin-2-one (5.9 g, 0.0333 mol) in THF (70 mL) was treated with butyllithium (13 mL of 2.56 M solution in hexanes, 0.0333 mol) at -78 °C, and the resulting mixture was cannulated to the solution of mixed anhydride. After 15 min, the reaction was warmed up to room temperature over 1.5 h and quenched with aqueous NaHSO<sub>4</sub> (150 mL of 1 M solution). Phases were separated, and the aqueous phase was extracted with diethyl ether. The combined organic layers were

washed with brine, saturated aqueous solution of NaHCO<sub>3</sub>, brine, then dried over MgSO<sub>4</sub>, and concentrated *in vacuo*. Purification by flash chromatography on silica gel (elution with hexanes:ethyl acetate 4:1) afforded 5.3 g (78% yield) of imide **36**. [ $\alpha$ ]<sup>26.1</sup><sub>D</sub> = +42.4 (*c* = 0.7, CHCl<sub>3</sub>); <sup>1</sup>H NMR (500 MHz, CDCl<sub>3</sub>)  $\delta$  1.05 (d, 3H, *J* = 7.0 Hz), 2.51 (m, 1H), 2.70 (dd, 1H, *J* = 13.0, 10.0 Hz), 2.76 (dd, 1H, *J* = 16.0, 6.5 Hz), 3.21 (dd, 1H, *J* = 16.0, 7.0 Hz), 3.26 (dd, 1H, *J* = 13.5, 3.0 Hz), 3.38 (dd, 1H, *J* = 9.0, 8.0 Hz), 3.45 (dd, 1H, *J* = 9.0, 5.5 Hz), 3.91 (t, 1H, *J* = 8.0 Hz), 4.04 (dd, 1H, *J* = 9.0, 3.0 Hz), 4.47 (d, H, *J* = 12.0 Hz), 4.50 (d, 1H, *J* = 12.0 Hz), 4.54 (m, 1H), 7.18 (d, 2H, *J* = 7.0 Hz), 7.23-7.34 (m, 8H); <sup>13</sup>C NMR (125 MHz, CDCl<sub>3</sub>)  $\delta$  17.2, 30.6, 37.9, 39.4, 55.0, 65.9, 72.9, 75.1, 127.2, 127.4, 127.5, 128.2, 128.8, 129.3, 135.3, 138.5, 153.5, 172.6; HRMS (ESI) calculated for C<sub>22</sub>H<sub>26</sub>NO<sub>4</sub> [M+H]<sup>+</sup> 368.1862, found 368.1865.

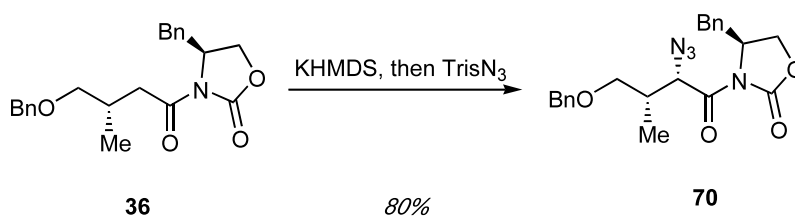

**Imide 70.** A cold (-78 °C) solution of imide **36** (5 g, 0.0137 mol) was cannulated to a stirred mixture of KHMDS (29 mL of 0.54 M solution in toluene, 0.0151 mol) and THF (50 mL) at -78 °C. After 30 min, the resulting enolate solution was treated with a cold (-78 °C) solution of trisyl azide<sup>i</sup> (5.3 g, 0.0172 mol) in THF (50 mL). After 5 min, acetic acid (3.6 mL, 0.063 mol) was introduced, and the reaction was left overnight at room temperature. The resulting suspension was washed with saturated aqueous solution of NaHCO<sub>3</sub>, brine, dried over MgSO<sub>4</sub>, and concentrated *in vacuo*. Purification by flash



chromatography on silica gel (elution with hexanes:ethyl acetate 4:1) afforded 4.48 g (80% yield) of imide **70**.  $[\alpha]^{26.1}_D = +129.2$  ( $c = 0.9$ ,  $\text{CHCl}_3$ );  $^1\text{H NMR}$  (500 MHz,  $\text{CDCl}_3$ )  $\delta$  1.00 (d, 3H,  $J = 7.0$  Hz), 2.67 (m, 1H), 2.72 (dd, 1H,  $J = 14.0, 10.0$  Hz), 3.21 (dd, 1H,  $J = 14.0, 4.0$  Hz), 3.40 (t, 1H,  $J = 9.0$  Hz), 3.50 (t, 1H,  $J = 10.0$  Hz), 3.55 (dd, 1H,  $J = 10.0, 5.0$  Hz), 3.87 (dd, 1H,  $J = 9.0, 4.0$  Hz), 4.21 (m, 1H), 4.34 (d, 1H,  $J = 11.0$  Hz), 4.48 (d, 1H,  $J = 11.0$  Hz), 5.08 (d, 1H,  $J = 9.0$  Hz), 7.11 (d, 2H,  $J = 7.0$  Hz), 7.21-7.35 (m, 8H);  $^{13}\text{C NMR}$  (125 MHz,  $\text{CDCl}_3$ )  $\delta$  13.3, 35.7, 37.7, 54.8, 62.1, 66.0, 72.9, 73.2, 127.2, 127.5, 127.7, 128.2, 128.8, 129.3, 134.9, 138.0, 153.3, 170.8; HRMS (ESI) calculated for  $\text{C}_{22}\text{H}_{25}\text{N}_4\text{O}_4$   $[\text{M}+\text{H}]^+$  409.1876, found 409.1865.

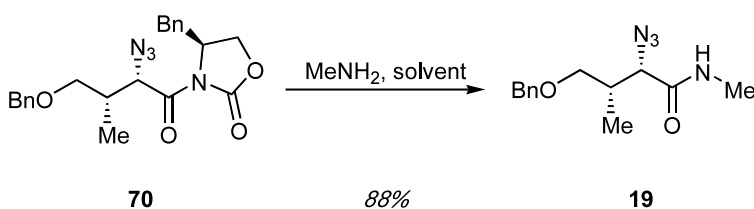

**Amide 19.** Imide **70** (4.44 g, 0.0109 mol) was dissolved in a cold (0 °C) solution of methylamine (54 mL of 2 M solution in THF, 0.108 mol), left for 1 h, and concentrated *in vacuo*. Purification by flash chromatography on silica gel (elution with hexanes:ethyl acetate 2:1) afforded 2.5 g (88% yield) of amide **19**.  $[\alpha]^{26.1}_D = -8.2$  ( $c = 0.8$ ,  $\text{CHCl}_3$ );  $^1\text{H NMR}$  (500 MHz,  $\text{CDCl}_3$ )  $\delta$  0.78 (d, 3H,  $J = 7.0$  Hz), 2.65 (m, 1H), 2.82 (d, 3H,  $J = 5.0$  Hz), 3.37 (t, 1H,  $J = 9.5$  Hz), 3.48 (dd, 1H,  $J = 9.5, 5.0$  Hz), 4.76 (d, 1H,  $J = 3.5$  Hz), 4.53 (m, 2H), 6.50 (m, 1H), 7.27-7.36 (m, 5H);  $^{13}\text{C NMR}$  (125 MHz,  $\text{CDCl}_3$ )  $\delta$  10.7, 26.1, 36.4, 65.7, 71.6, 73.0, 127.7, 127.8, 128.4, 138.0, 169.8; HRMS (ESI) calculated for  $\text{C}_{13}\text{H}_{19}\text{N}_4\text{O}_2$   $[\text{M}+\text{H}]^+$  263.1508, found 263.1516.

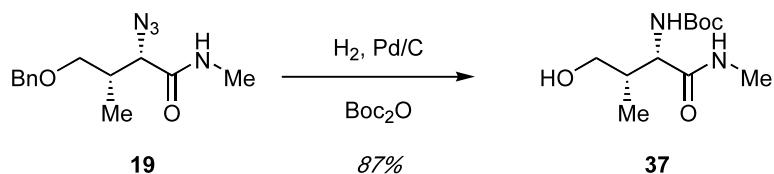

**Alcohol 37.** A mixture of amide **19** (2.45 g, 9.34 mmol), Boc anhydride (2.45 g, 11.2 mmol), and palladium on carbon (2.5 g, 10% w/w) in THF (45 mL) was vigorously stirred under hydrogen atmosphere for 2 days at room temperature. The reaction was sparged with nitrogen, filtered through Celite, and concentrated *in vacuo*. The residue was washed with hexanes and dried *in vacuo* to afford 2 g (87%) of alcohol **37**.  $[\alpha]_D^{26.1} = +53.9$  ( $c = 0.6$ ,  $\text{CHCl}_3$ );  $^1\text{H NMR}$  (500 MHz,  $\text{CDCl}_3$ )  $\delta$  0.69 (d, 3H,  $J = 5.5$  Hz), 1.43 (s, 9H), 2.09 (m, 1H), 2.81 (d, 3H,  $J = 3.0$  Hz), 3.27 (m, 1H), 3.46 (m, 1H), 4.46 (d, 1H,  $J = 4.0$  Hz), 4.70 (m, 1H), 5.78 (d, 1H,  $J = 4.0$  Hz), 7.10 (m, 1H);  $^{13}\text{C NMR}$  (125 MHz,  $\text{CDCl}_3$ )  $\delta$  10.1, 26.3, 28.2, 39.8, 53.4, 64.0, 80.3, 157.3, 171.7; HRMS (ESI) calculated for  $\text{C}_{11}\text{H}_{23}\text{N}_2\text{O}_4$   $[\text{M}+\text{H}]^+$  247.1658, found 247.1666.

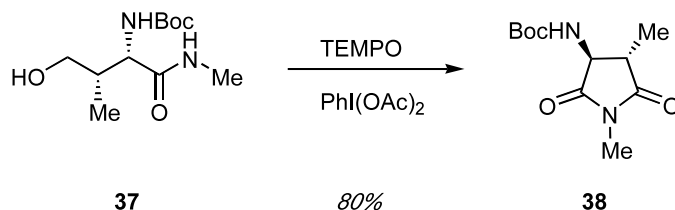

**Carbamate 38.** A solution of alcohol **37** (0.96 g, 3.9 mmol), iodobenzene diacetate (10 g, 31.2 mmol), and TEMPO (0.183 g, 1.17 mmol) in dichloromethane (40 mL) was left

for 3 days at room temperature. The reaction was quenched with saturated aqueous solution of NaHCO<sub>3</sub> (20 mL) followed by saturated aqueous solution of Na<sub>2</sub>S<sub>2</sub>O<sub>3</sub> (40 mL) and stirred for 1 h. The resulting mixture was extracted twice with ethyl acetate, and the combined organic extracts were dried over MgSO<sub>4</sub> and concentrated *in vacuo*. The bulk of iodobenzene was removed under vacuum (35 °C, 0.5 torr), and the residue was purified by flash chromatography on silica gel (elution with hexanes:ethyl acetate 1:1) to afford 0.75 g (80% yield) of carbamate **38**.  $[\alpha]_D^{26.3} = -73.0$  ( $c = 0.7$ , CHCl<sub>3</sub>); <sup>1</sup>H NMR (500 MHz, CDCl<sub>3</sub>) δ 1.40 (d, 3H,  $J = 7.5$  Hz), 1.42 (s, 9H), 2.91 (m, 1H), 3.00 (s, 3H), 3.85 (m, 1H), 5.30 (d, 1H,  $J = 6.0$  Hz); <sup>13</sup>C NMR (125 MHz, CDCl<sub>3</sub>) δ 13.9, 25.0, 28.2, 42.2, 57.9, 80.8, 155.3, 175.0, 177.4; HRMS (ESI) calculated for C<sub>11</sub>H<sub>18</sub>N<sub>2</sub>O<sub>4</sub>Na [M+Na]<sup>+</sup> 265.1164, found 265.1167.

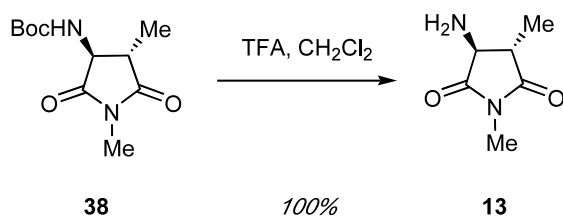

**Amine 13.** Carbamate **38** (0.96 g, 3.97 mmol) was dissolved in a mixture of TFA (10 mL) and dichloromethane (30 mL), left for 1.5 h at room temperature, and concentrated *in vacuo*. The residue was azeotroped three times with chloroform until crystallization occurred, dissolved in ethyl acetate, and passed through a plug of basic alumina to afford 0.56 g (quantitative yield) of amine **13**.  $[\alpha]_D^{26.6} = -152.7$  ( $c = 0.5$ , CHCl<sub>3</sub>); <sup>1</sup>H NMR (500 MHz, CDCl<sub>3</sub>) δ 1.40 (d, 3H,  $J = 7.0$  Hz), 1.68 (s, 2H), 2.52 (m, 1H), 2.99 (s, 3H), 3.45 (d,

1H,  $J = 6.0$  Hz);  $^{13}\text{C}$  NMR (125 MHz,  $\text{CDCl}_3$ )  $\delta$  13.9, 24.9, 44.6, 58.5, 177.8, 178.6;  
 HRMS (ESI) calculated for  $\text{C}_6\text{H}_{11}\text{N}_2\text{O}_2$   $[\text{M}+\text{H}]^+$  143.0821, found 143.0823.

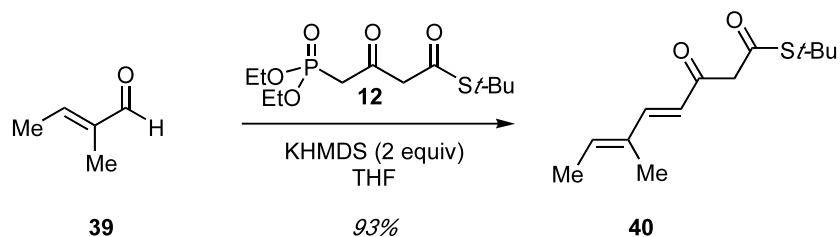

**Thioester 40.** A stirred solution of phosphonate **12** (0.2 g, 0.64 mmol) in THF (6 mL) was treated dropwise with KHMDS (2.4 mL of 0.54 M solution in toluene, 1.28 mmol) at  $-78$  °C. The reaction mixture was stirred 15 min and treated with tiglic aldehyde **39** (0.06 mL, 0.6 mmol). After 45 min, reaction was warmed up to room temperature, stirred 30 min, and quenched with saturated aqueous  $\text{NH}_4\text{Cl}$ . The resulting solution was extracted twice with diethyl ether. The combined organic extracts were washed with brine, dried over  $\text{MgSO}_4$  and concentrated *in vacuo*. Purification by flash chromatography on silica gel (elution with hexanes:ethyl acetate 9:1) afforded 0.134 g (93% yield) of thioester **40**.  $^1\text{H}$  NMR (ketone and enol forms, 500 MHz,  $\text{CDCl}_3$ )  $\delta$  1.46 (s, 4.5H), 1.51 (s, 9H), 1.75 (s, 3H), 1.77 (s, 1.5H), 1.78 (d, 3H,  $J = 7.0$  Hz), 1.82 (d, 1.5H,  $J = 7.0$  Hz), 3.72 (s, 1H), 5.38 (s, 1H), 5.65 (d, 1H,  $J = 15.5$  Hz), 5.90 (q, 1H,  $J = 7.0$  Hz), 6.09 (q, 0.5H,  $J = 7.0$  Hz), 6.13 (d, 0.5H,  $J = 16.0$  Hz), 7.10 (d, 1H,  $J = 15.5$  Hz), 7.22 (d, 0.5H,  $J = 15.5$  Hz);  $^{13}\text{C}$  NMR (ketone and enol forms, 125 MHz,  $\text{CDCl}_3$ )  $\delta$  11.69, 11.74, 14.5, 14.8, 29.6, 30.1, 48.2, 48.9, 56.6, 101.0, 118.6, 122.9, 134.13, 134.15, 134.6, 139.1, 143.1, 150.0, 167.5, 191.9, 192.8, 195.9; HRMS (ESI) calculated for  $\text{C}_{13}\text{H}_{20}\text{O}_2\text{NaS}$   $[\text{M}+\text{Na}]^+$  263.1082, found 263.1082.

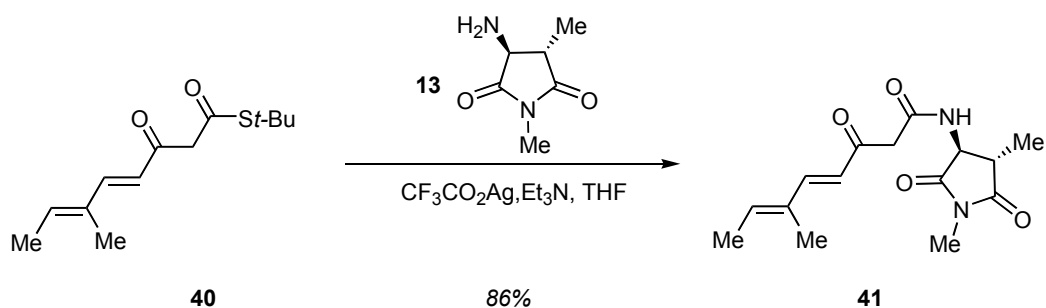

**Ketoamide 41.** A stirred solution of thioester **40** (26.0 mg, 0.108 mmol) and amine **51** (23.0 mg, 0.162 mmol) in THF (1.6 mL) was treated with triethylamine (0.06 mL, 0.432 mmol) at 0 °C, followed by addition of silver (I) trifluoroacetate (48.0 mg, 0.216 mmol) in one portion. After 1 h, the reaction mixture was concentrated *in vacuo*. Purification by preparative TLC on silica gel (developed in AcOEt) afforded 27.0 mg (86% yield) of ketoamide **41**.  $[\alpha]^{23.2}_D = -64.9$  ( $c = 2.7$ ,  $\text{CHCl}_3$ );  $^1\text{H NMR}$  (ketone form, 500 MHz,  $\text{CDCl}_3$ )  $\delta$  1.38 (d, 3H,  $J = 7.0$  Hz), 1.77 (s, 3H), 1.84 (d, 3H,  $J = 7.0$  Hz), 2.92 (m, 1H), 3.00 (s, 3H), 3.61 (s, 2H), 4.09 (t, 1H,  $J = 7.0$  Hz), 6.07 (d, 1H,  $J = 15.5$  Hz), 6.13 (q, 1H,  $J = 7.0$  Hz) 7.26 (d, 1H,  $J = 16.0$  Hz), 8.20 (d, 1H,  $J = 7.0$  Hz);  $^{13}\text{C NMR}$  (ketone form, 125 MHz,  $\text{CDCl}_3$ )  $\delta$  11.7, 14.0, 14.9, 25.0, 41.8, 45.7, 56.9, 123.0, 134.0, 140.6, 150.8, 167.0, 174.3, 177.3, 195.6; HRMS (ESI) calculated for  $\text{C}_{15}\text{H}_{20}\text{N}_2\text{O}_4\text{Na}$   $[\text{M}+\text{Na}]^+$  315.1321, found 315.1322.

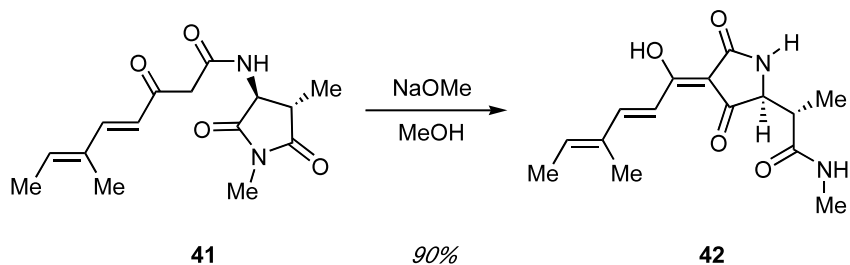

**Truncated aglycone 42.** A stirred solution of ketoamide **41** (0.053 g, 0.182 mmol) in methanol (1.1 mL) was treated with sodium methoxide (1.1 mL of 0.5 M solution in methanol, 0.55 mmol) at 0 °C. Reaction mixture was stirred overnight at room temperature and concentrated *in vacuo*. The residue was treated with aqueous HCl (0.7 mL of 1 N solution) and extracted twice with ethyl acetate. The combined organic extracts were washed with brine, dried over MgSO<sub>4</sub>, and concentrated *in vacuo* to afford 0.048 g (90% yield) of truncated aglycone **42**.  $[\alpha]^{24.3}_D = -2.9$  (*c* = 2.4, CHCl<sub>3</sub>); <sup>1</sup>H NMR (ketone forms, 500 MHz, CDCl<sub>3</sub>) δ 1.02 (d, 3H, *J* = 7.0 Hz), 1.86 (m, 6H), 2.80 (d, 3H, *J* = 2.5 Hz), 2.90 (m, 1H), 4.10 (s, 1H), 6.17 (m, 2H), 6.84 (s, 1H), 7.04 (d, 1H, *J* = 15.5 Hz), 7.51 (d, 1H, *J* = 15.5 Hz); <sup>13</sup>C NMR (ketone form, 125 MHz, CDCl<sub>3</sub>) δ 11.26, 11.72, 15.1, 26.3, 40.8, 63.0, 100.1, 115.5, 135.1, 140.8, 150.3, 175.0, 175.76, 175.84, 194.3; HRMS (ESI) calculated for C<sub>15</sub>H<sub>20</sub>N<sub>2</sub>O<sub>4</sub>Na [M+Na]<sup>+</sup> 315.1321, found 315.1319.

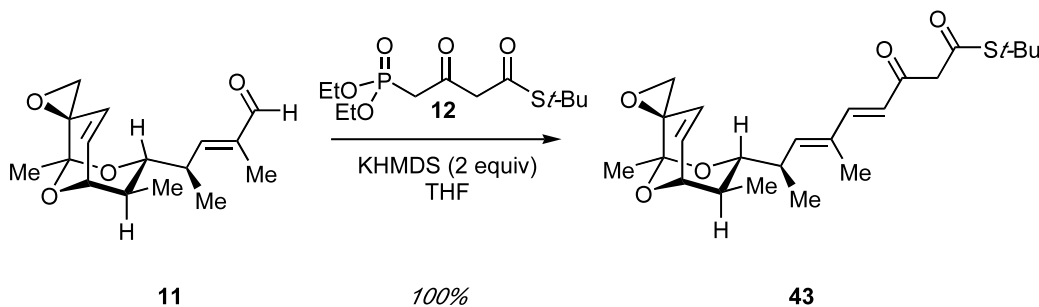

**Thioester 43.** A stirred solution of phosphonate **12** (0.045 g, 0.144 mmol) in THF (1.2 mL) was treated dropwise with KHMDS (0.53 mL of 0.54 M solution in toluene, 0.288 mmol) at -78 °C. After 15 min reaction mixture was transferred *via* cannula into the cold (-78 °C) solution of streptal (**11**) (0.022 g, 0.079 mmol) in THF (0.4 mL). After 45 min

reaction was warmed up to room temperature, stirred 30 min and quenched with saturated aqueous  $\text{NH}_4\text{Cl}$ . The resulting solution was extracted twice with diethyl ether. The combined organic extracts were washed with brine, dried over  $\text{MgSO}_4$  and concentrated *in vacuo*. Purification by flash chromatography on silica gel (elution with hexanes:ethyl acetate 9:1) afforded 0.035 g (100% yield) of thioester **43**.  $[\alpha]^{23.7}_{\text{D}} = +89.4$  ( $c = 0.7$ ,  $\text{CHCl}_3$ );  $^1\text{H}$  NMR (ketone and enol forms, 500 MHz,  $\text{CDCl}_3$ )  $\delta$  0.67 (m, 3H), 1.02 (m, 3H), 1.21 (m, 3H), 1.47 (s, 3H), 1.51 (s, 6H), 1.77 (m, 3H), 1.93 (m, 1H), 2.70 (m, 1H), 2.80 (m, 1H), 2.97 (m, 1H), 3.62 (m, 1H), 3.74 (d, 0.6H,  $J = 2.0$  Hz), 4.33 (m, 1H), 5.39 (s, 0.6H), 5.61 (m, 1H), 5.68 (d, 0.75H,  $J = 15.5$  Hz), 5.99 (d, 0.7H,  $J = 10.5$  Hz), 6.15 (d, 0.5H,  $J = 15.5$  Hz), 6.33 (dd, 1H,  $J = 10.0, 5.0$  Hz), 7.15 (d, 0.7H,  $J = 15.5$  Hz), 7.26 (d, 0.4H,  $J = 15.5$  Hz);  $^{13}\text{C}$  NMR (data for ketone form only, 125 MHz,  $\text{CDCl}_3$ )  $\delta$  12.2, 12.48, 12.49, 17.1, 17.2, 22.2, 29.6, 30.2, 33.7, 33.9, 35.0, 35.1, 48.2, 49.0, 50.50, 50.51, 54.97, 55.02, 56.2, 71.38, 71.43, 76.1, 76.2, 98.77, 98.83, 101.1, 119.3, 123.8, 130.48, 130.53, 132.91, 132.95, 133.8, 133.9, 140.3, 143.3, 144.5, 150.1, 167.3, 192.0, 192.9, 195.9; HRMS (ESI) calculated for  $\text{C}_{24}\text{H}_{35}\text{O}_5\text{S}$   $[\text{M}+\text{H}]^+$  435.2205, found 435.2203.

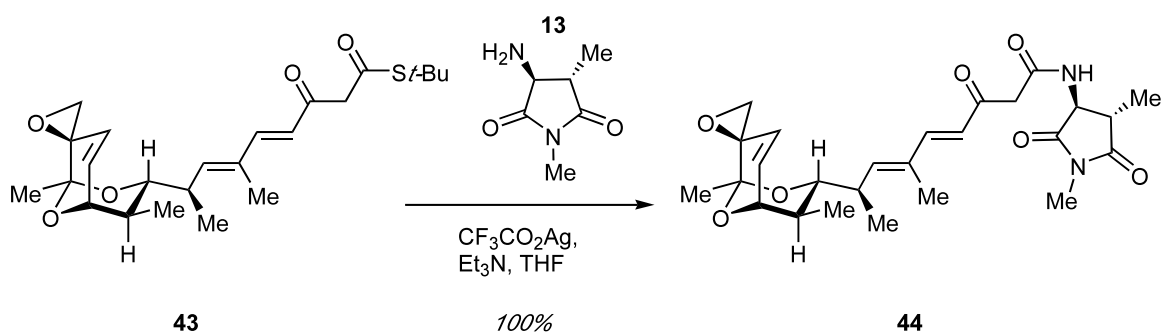

**Ketoamide 44.** A stirred solution of thioester **43** (16.0 mg, 0.036 mmol) and amine **13** (8.0 mg, 0.054 mmol) in THF (0.5 mL) was treated with triethylamine (0.02 mL, 0.144 mmol) at 0 °C, followed by addition of silver (I) trifluoroacetate (16.0 mg, 0.072 mmol) in one portion. After 15 min reaction mixture was concentrated *in vacuo*. Purification by flash chromatography on silica gel (elution with hexanes:ethyl acetate 1:3) afforded 17.0 mg (100% yield) of ketoamide **44**.  $[\alpha]_D^{24.3} = +30.3$  ( $c = 1.7$ ,  $\text{CHCl}_3$ );  $^1\text{H NMR}$  (ketone form, 500 MHz,  $\text{CDCl}_3$ )  $\delta$  0.69 (d, 3H,  $J = 7.0$  Hz), 1.04 (d, 3H,  $J = 7.0$  Hz), 1.40 (d, 3H,  $J = 7.5$  Hz), 1.80 (s, 3H), 1.92 (m, 1H), 2.75 (m, 1H), 2.81 (d, 1H,  $J = 5.5$  Hz), 2.94 (m, 1H), 2.97 (d, 1H,  $J = 5.5$  Hz), 3.02 (s, 3H), 3.63 (m, 3H), 4.09 (m, 1H), 4.34 (t, 1H,  $J = 4.5$  Hz), 5.62 (d, 1H,  $J = 10.0$  Hz), 6.12 (d, 1H,  $J = 15.5$  Hz), 6.22 (d, 1H,  $J = 10.0$  Hz), 6.33 (dd, 1H,  $J = 10.0, 4.5$  Hz), 7.31 (d, 1H,  $J = 16.0$  Hz), 8.16 (d, 1H,  $J = 7.0$  Hz);  $^{13}\text{C NMR}$  (ketone form, 125 MHz,  $\text{CDCl}_3$ )  $\delta$  12.2, 12.5, 14.0, 17.0, 22.2, 25.1, 34.0, 35.1, 41.8, 45.6, 50.5, 54.9, 57.0, 71.3, 76.0, 98.8, 123.7, 130.5, 132.8, 133.7, 145.9, 150.9, 166.8, 174.3, 177.3, 195.5; HRMS (ESI) calculated for  $\text{C}_{26}\text{H}_{35}\text{N}_2\text{O}_7$   $[\text{M}+\text{H}]^+$  487.2444, found 487.2438.

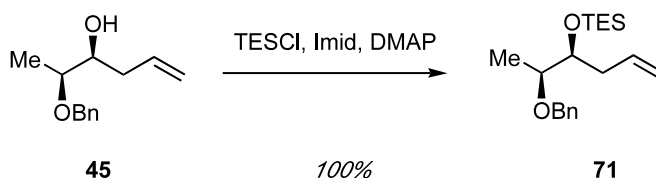

**Silyl ether 71.** A stirred solution of known (2*S*,3*S*)-2-(benzyloxy)hex-5-en-3-ol **45**<sup>4</sup> (4 g, 0.0194 mol), imidazole (3 g, 0.044 mol), and DMAP (0.244 g, 0.002 mol) in dichloromethane (20 mL) was treated with chlorotriethylsilane (4.9 mL, 0.029 mol). The reaction was left overnight at room temperature then diluted with hexanes, washed with



brine, dried over  $\text{MgSO}_4$ , and concentrated *in vacuo*. The residue was heated at  $60\text{ }^\circ\text{C}$  under vacuum (0.5 torr) for 1 h to yield silyl ether **71**.  $[\alpha]_{\text{D}}^{27.9} = -0.2$  ( $c = 2.0$ ,  $\text{CHCl}_3$ );  $^1\text{H}$  NMR (500 MHz,  $\text{CDCl}_3$ )  $\delta$  0.56 (q, 6H,  $J = 7.5$  Hz), 0.94 (t, 9H,  $J = 7.5$  Hz), 1.15 (d, 3H,  $J = 6.5$  Hz), 2.17 (m, 1H), 2.40 (m, 1H), 3.50 (m, 1H), 3.75 (m, 1H), 4.51 (d, 1H,  $J = 12.0$  Hz), 4.61 (d, 1H,  $J = 12.0$  Hz), 5.00-5.10 (m, 2H), 5.83 (m, 1H), 7.28 (m, 1H), 7.35 (m, 4H);  $^{13}\text{C}$  NMR (125 MHz,  $\text{CDCl}_3$ )  $\delta$  5.0, 6.9, 14.1, 36.5, 71.0, 74.0, 77.2, 116.5, 127.4, 127.6, 128.2, 136.9, 139.0; HRMS (ESI) calculated for  $\text{C}_{19}\text{H}_{33}\text{O}_2\text{Si}$   $[\text{M}+\text{H}]^+$  321.2250, found 321.2253.

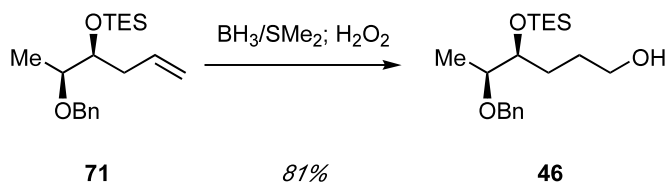

**Alcohol 46.** A stirred solution of the silyl ether **71** in THF (19 mL) was treated dropwise with borane-dimethylsulfide complex (37.7 mL of 2 M solution in THF, 0.0755 mol) at  $0\text{ }^\circ\text{C}$ . The reaction was left overnight at room temperature then cooled to  $0\text{ }^\circ\text{C}$  and treated dropwise with aqueous NaOH (110 mL of 3 M solution) followed by aqueous  $\text{H}_2\text{O}_2$  (50 mL of 30% w/w solution). After 2 h at room temperature, the mixture was extracted twice with diethyl ether. The combined organic extracts were washed with saturated aqueous solution of  $\text{Na}_2\text{S}_2\text{O}_3$  and brine, dried over  $\text{MgSO}_4$ , and concentrated *in vacuo*. Purification by flash chromatography on silica gel (elution with hexanes:ethyl acetate 4:1) afforded 5.16 g (81% yield over two steps) of alcohol **46**.  $[\alpha]_{\text{D}}^{27.9} = -2.5$  ( $c = 1.8$ ,  $\text{CHCl}_3$ );  $^1\text{H}$  NMR (500 MHz,  $\text{CDCl}_3$ )  $\delta$  0.58 (q, 6H,  $J = 8.0$  Hz), 0.93 (t, 9H,  $J = 8.0$  Hz),

1.13 (d, 3H,  $J = 6.5$  Hz), 1.41-1.59 (m, 2H), 1.68 (m, 2H), 1.90 (m, 1H), 3.51 (m, 1H), 3.62 (m, 1H), 3.73 (m, 1H), 4.49 (d, 1H,  $J = 12.0$  Hz), 4.61 (d, 1H,  $J = 12.0$  Hz), 7.28 (m, 1H), 7.33 (m, 4H);  $^{13}\text{C}$  NMR (125 MHz,  $\text{CDCl}_3$ )  $\delta$  5.0, 6.9, 13.8, 27.9, 29.1, 63.1, 71.0, 74.0, 77.2, 127.4, 127.6, 128.2, 138.8; HRMS (ESI) calculated for  $\text{C}_{19}\text{H}_{35}\text{O}_3\text{Si}$   $[\text{M}+\text{H}]^+$  339.2355, found 339.2361.

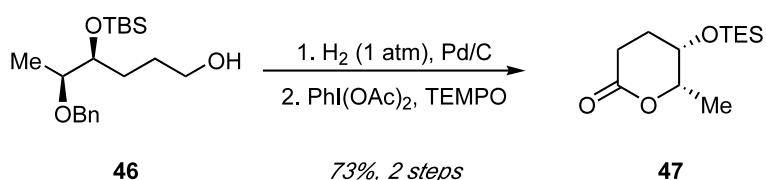

**Lactone 47.** A mixture of alcohol **46** (0.76 g, 2.25 mmol) and palladium on carbon (0.38 g, 10% w/w) in THF (11 mL) was vigorously stirred under hydrogen atmosphere for 2 days at room temperature. The reaction was sparged with nitrogen, filtered through Celite, and concentrated *in vacuo*. The residue was dissolved in dichloromethane (30 mL), and iodobenzene diacetate (3.62 g, 11.25 mmol) and TEMPO (0.07 g, 0.45 mmol) were added. The reaction was left overnight at room temperature, quenched with saturated aqueous solution of  $\text{Na}_2\text{S}_2\text{O}_3$ , and stirred for 1 h. Phases were separated, and the organic phase was washed with saturated aqueous solution of  $\text{NaHCO}_3$ , dried over  $\text{MgSO}_4$ , and concentrated *in vacuo*. Purification by flash chromatography on silica gel (elution with hexanes:ethyl acetate 1:1) afforded 0.4 g (73% yield over two steps) of lactone **47**.  $[\alpha]_D^{27.9} = -9.9$  ( $c = 0.9$ ,  $\text{CHCl}_3$ );  $^1\text{H}$  NMR (500 MHz,  $\text{CDCl}_3$ )  $\delta$  0.61 (q, 6H,  $J = 8.0$  Hz), 0.95 (t, 9H,  $J = 8.0$  Hz), 1.32 (d, 3H,  $J = 6.5$  Hz), 1.94 (m, 2H), 2.47 (m, 1H), 2.69 (m, 1H), 3.89 (m, 1H), 4.38 (q, 1H,  $J = 6.5$  Hz);  $^{13}\text{C}$  NMR (125 MHz,  $\text{CDCl}_3$ )  $\delta$  4.7,

6.7, 17.5, 24.9, 27.8, 65.7, 79.5, 170.8; HRMS (ESI) calculated for  $C_{12}H_{25}O_3Si$   $[M+H]^+$  245.1573, found 245.1582.

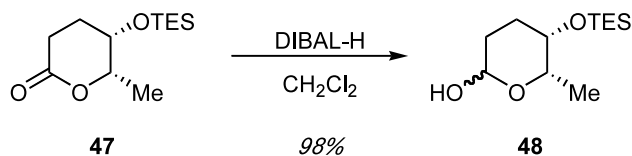

**Rhodinose 48.** A stirred solution of lactone **47** (0.37 g, 1.51 mmol) in dichloromethane (14 mL) was treated dropwise with DIBAL-H (1.8 mL of 1 M solution in toluene, 1.8 mmol) at  $-78\text{ }^\circ\text{C}$ . After 1 h, the reaction was quenched with brine (0.5 mL) and warmed to room temperature. Sodium sulfate was added, and the resulting suspension was stirred overnight. The liquids were decanted and the solids were rinsed with diethyl ether. The combined solutions were dried over  $\text{MgSO}_4$  and concentrated *in vacuo* to afford 0.366 g (98% yield) of known rhodinose **48**.<sup>5</sup>  $[\alpha]_{\text{D}}^{28.0} = -22.5$  ( $c = 1.6$ ,  $\text{CHCl}_3$ );  $^1\text{H}$  NMR ( $\alpha$ -pyranose and  $\beta$ -pyranose forms, 500 MHz,  $\text{CDCl}_3$ )  $\delta$  0.63 (m, 6H), 0.96 (m, 9H), 1.13 (d, 1.8H,  $J = 6.5$  Hz), 1.20 (d, 1.3H,  $J = 6.5$  Hz), 1.46-2.13 (m, 4H), 3.23 (s, 0.6H), 3.50 (s, 0.4H), 3.58 (q, 0.4H,  $J = 6.5$  Hz), 3.61 (s, 0.6H), 3.75 (d, 0.4H,  $J = 8.0$  Hz), 4.11 (q, 0.6H,  $J = 6.5$  Hz), 4.70 (t, 0.4H,  $J = 7.5$  Hz), 5.31 (s, 0.6H);  $^{13}\text{C}$  NMR ( $\alpha$ -pyranose and  $\beta$ -pyranose forms, 125 MHz,  $\text{CDCl}_3$ )  $\delta$  4.9, 6.9, 17.3, 17.6, 23.8, 25.7, 27.5, 30.5, 66.7, 67.1, 67.8, 74.6, 91.6, 96.3.

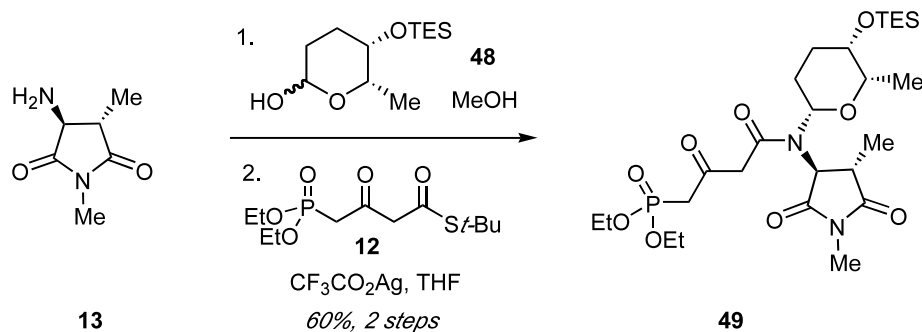

**Phosphonate 49.** Protected rhodinoside **48** (0.2 g, 0.812 mmol) and amine **13** (0.115 g, 0.812 mmol) were dissolved in methanol (3 mL). The solution was left overnight and concentrated *in vacuo* to afford crude *N*-glycosyl imide. Molecular sieves (5Å, 0.8 g, activated under vacuum) were added to the solution of crude *N*-glycosyl imide and thioate **12**<sup>6</sup> (0.31 g, 1 mmol) in THF (7 mL). The resulting slurry was treated with the solution of silver (I) trifluoroacetate (0.29 g, 1.3 mmol) in THF (3 mL), and the reaction was stirred for 1.5 h at room temperature. Diethyl ether was added and the resulting suspension was washed twice with saturated aqueous solution of  $\text{NaHCO}_3$ . The organic layers were dried over  $\text{MgSO}_4$ , filtered through Celite, and concentrated *in vacuo*. Purification by flash chromatography on silica gel (elution with ethyl acetate) afforded 0.29 g (60% yield over two steps) of phosphonate **49**.  $[\alpha]^{23.0}_{\text{D}} = -36.0$  ( $c = 3.0$ ,  $\text{CHCl}_3$ );  $^1\text{H}$  NMR (ketone and enol forms, 500 MHz,  $\text{CDCl}_3$ )  $\delta$  0.56 (m, 6H), 0.92 (m, 9H), 1.13 (m, 3H), 1.32 (m, 9H), 1.60 (m, 1H), 1.74 (s, 1H), 1.89 (m, 1H), 2.02 (m, 1H), 2.75 (d, 1H,  $J = 22.5$  Hz), 2.93 (m, 1H), 2.99 (m, 3H), 3.18 (d, 1H,  $J = 22.5$  Hz), 3.52 (s, 1H), 3.60 (q, 1H,  $J = 6.0$  Hz), 3.74 (dd, 2H,  $J = 20.0, 15.5$  Hz), 3.85 (d, 1H,  $J = 5.5$  Hz), 4.12 (m, 4H), 4.94 (dd, 0.7H,  $J = 11.0, 3.0$  Hz), 5.00 (dd, 0.2H,  $J = 11.0, 3.0$  Hz), 5.31 (d, 0.2H,  $J = 3.0$  Hz), 13.96 (s, 0.2H);  $^{13}\text{C}$  NMR (data for ketone form only, 125 MHz,  $\text{CDCl}_3$ )  $\delta$  4.8, 6.8,

13.9, 16.19, 16.24, 17.7, 23.2, 24.9, 30.5, 40.5, 41.5, 42.5, 49.7, 59.1, 62.7, 62.8, 65.9, 75.9, 84.6, 165.8, 174.2, 178.2, 195.1; HRMS (ESI) calculated for C<sub>26</sub>H<sub>48</sub>N<sub>2</sub>O<sub>9</sub>SiP [M+H]<sup>+</sup> 591.2867, found 591.2871.

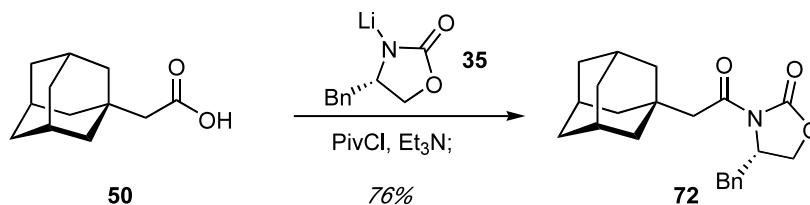

**Imide 72.** Triethyl amine (2.0 mL, 0.01435 mol) was added drop-wise to a stirred solution of 1-adamantane acetic acid (**50**) (2.2106 g, 0.01138 mol) in 80 mL of THF at -78 °C. To this solution, 1.5 mL of pivaloyl chloride was added drop-wise, and stirred at -78 °C for 15 minutes. The solution was subsequently warmed to 0 °C for 45 minutes and returned to -78 °C. A separate flask was charged with 3.2219 g of (4S)-4-benzyl-1,3-oxazolidin-2-one (**35**) (0.01818 mol) and equipped with a stir bar. Lithium Oxazolidinone **35** was dissolved in 40 mL of THF and cooled to -78 °C. This solution was treated drop wise with 9.0 mL of n-butyllithium (2.59M in hexanes) and stirred for 5 minutes. This solution was added to the reaction mixture via cannula, and stirred at -78 °C for 15 minutes. The solution was warmed to room temperature and stirred for 1 hour. The reaction was quenched with 82 mL of 1 M potassium bisulfate. The resulting solution was extracted three times with Et<sub>2</sub>O. The combined organic extracts were washed with saturated aqueous sodium bicarbonate and brine, and dried over Na<sub>2</sub>SO<sub>4</sub> and concentrated *in vacuo*. Purification by flash chromatography on silica gel (elution with 100% CH<sub>2</sub>Cl<sub>2</sub>)

afforded 3.0354 g (76% yield) of imide **72**.  $[\alpha]_D^{23.1} = -1.7$  (c = 0.53, acetone);  $^1\text{H NMR}$  (500 MHz,  $\text{CDCl}_3$ )  $\delta$  1.70 (s, 12H),  $\delta$  1.97 (s, 3H),  $\delta$  2.69 (t, 1H,  $J = 11.65$  Hz),  $\delta$  2.82 (q, 2H,  $J = 13.88$  Hz),  $\delta$  3.35 (d, 1H,  $J = 13.20$  Hz),  $\delta$  4.13 (s, 1H),  $\delta$  7.13 – 7.42 (m, 5H);  $^{13}\text{C NMR}$  (125 MHz,  $\text{CDCl}_3$ )  $\delta$  28.88, 34.14, 36.98, 38.34, 42.47, 47.09, 55.67, 65.96, 127.51, 129.16, 129.63, 135.71, 153.75, 171.53; HRMS (ESI) calculated for  $\text{C}_{22}\text{H}_{28}\text{NO}_3$   $[\text{M}+\text{H}]^+$  354.2069, found 354.2045.

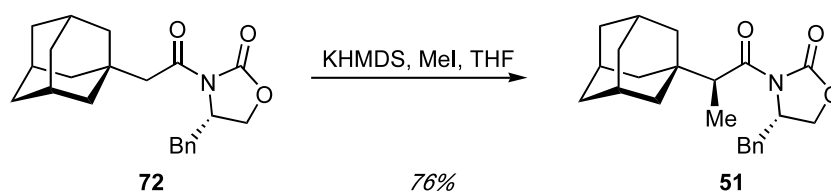

**Imide 51.** A round bottom flask was charged with 17.5 mL of NaHMDS solution (0.6M in toluene). The flask was equipped with a magnetic stir bar and 25.75 mL of THF was added. The resulting solution was cooled to  $-78^\circ\text{C}$ . A separate flask was charged with 3.0354 g of imide **72** (0.00859 mol). This flask was equipped with a stir bar and 57.25 mL of THF was added. The resulting solution was cooled to  $-78^\circ\text{C}$  and added to the NaHMDS solution via cannula. After 1 hour, 1.60 mL of iodomethane (0.02576 mol) was added drop-wise to the stirred reaction mixture. The solution was warmed to room temperature, and quenched with saturated aqueous solution of  $\text{NH}_4\text{Cl}$ . The pH of the aqueous layer was adjusted to 2 with 1 M HCl. The resulting mixture was extracted three times with ethyl acetate. The combined organic extracts were washed with saturated aqueous  $\text{NaHCO}_3$ , saturated aqueous  $\text{Na}_2\text{S}_2\text{O}_3$ , and brine, and dried over  $\text{MgSO}_4$ , and concentrated *in vacuo*. Purification by flash chromatography on silica gel (elution with

hexanes:ethyl acetate 9:1) afforded 2.3896 g of imide **51**.  $[\alpha]_D^{24.9} = +40.1$  ( $c = 5.0$ , acetone);  $^1\text{H NMR}$  (500 MHz,  $\text{CDCl}_3$ )  $\delta$  1.18 (d, 3H,  $J = 7.01$  Hz), 1.51 – 1.85 (m, 12H), 2.01 (s, 3H), 2.79 (dd, 1H,  $J = 9.70, 13.31$  Hz), 3.31 (dd, 1H,  $J = 3.12, 13.32$ ) 3.83 (q, 1H,  $J = 6.99$  Hz), 4.69 – 4.78 (m, 1H), 7.22 – 7.42 (m, 5H);  $^{13}\text{C NMR}$  (125 MHz,  $\text{CDCl}_3$ )  $\delta$  11.61, 28.93, 35.90, 37.28, 38.21, 39.67, 45.88, 55.89, 66.02, 127.63, 129.25, 129.81, 135.80, 153.81, 176.59. HRMS (ESI) calculated for  $\text{C}_{23}\text{H}_{30}\text{NO}_3$   $[\text{M}+\text{H}]^+$  368.2226, found 368.2202.

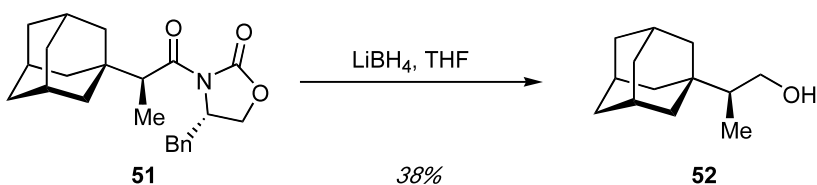

**Alcohol 52.** A stirred solution of imide **51** (1.1948 g, 0.00327 mol, in 30 mL of THF) was cooled to  $0^\circ\text{C}$ . To this solution, 0.20 mL of MeOH was added, followed by 3.50 mL of  $\text{LiBH}_4$  solution (2M in THF, 0.00700 mol). After stirring for 2 hours at  $0^\circ\text{C}$ , the solution was warmed to room temperature, and stirred for an additional 4 hours. The reaction mixture was washed with 20 mL of aqueous 2M NaOH, and stirred until both phases were clear. The organic phase was separated and the aqueous layer was extracted three times with  $\text{Et}_2\text{O}$ . The combined organic extracts were washed with  $\text{H}_2\text{O}$  and brine, dried over  $\text{Na}_2\text{SO}_4$ , and concentrated *in vacuo*. Purification by flash chromatography on silica gel (elution using 30%  $\text{Et}_2\text{O}$  in pentanes) afforded 0.2379 g (37.5% yield) of pure alcohol **52**.  $[\alpha]_D^{25.2} = +110.16$  ( $c = 0.64$ , acetone);  $^1\text{H NMR}$  (500 MHz,  $\text{CDCl}_3$ )  $\delta$  0.91 (d, 3H,  $J = 6.9$  Hz), 1.12-1.26 (m, 2H), 1.58 (ddt, 12H,  $J = 7.08, 7.08, 12.12, 32.82$  Hz), 1.95

(s, 3H), 3.36 (dd, 1H,  $J = 8.46, 10.38$  Hz), 3.84 (dd, 1H,  $J = 3.91, 10.42$  Hz);  $^{13}\text{C}$  NMR (125 MHz,  $\text{CDCl}_3$ )  $\delta$  11.03, 28.81, 34.24, 37.43, 40.01, 46.21, 64.56; HRMS (ESI) calculated for  $\text{C}_{13}\text{H}_{22}\text{O}$   $[\text{M}]^+$  194.16707, found 194.16516.

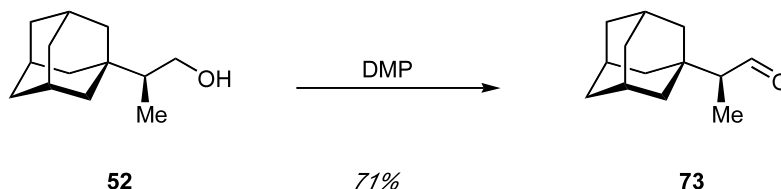

**Aldehyde 73.** A round bottom flask was charged with 0.0404 g of alcohol **52** (0.208 mmol), and equipped with a magnetic stir bar. Dichloromethane (1.0 mL) was added to the flask, and the resulting solution was cooled to  $0^\circ\text{C}$ . This solution was then treated with 0.1406 g of Dess-Martin periodinane (0.3315 mmol). After 5 hours, the reaction was quenched with saturated aqueous  $\text{NaHCO}_3$  solution, washed with saturated aqueous  $\text{Na}_2\text{S}_2\text{O}_3$ , and extracted three times with  $\text{Et}_2\text{O}$ . The combined organic extracts were dried over  $\text{MgSO}_4$  and concentrated *in vacuo*. Purification by flash chromatography (elution with hexanes:ethyl acetate 4:1) afforded 0.0282 g (70.5% yield) of pure aldehyde **73**.  $[\alpha]_D^{24.7} = +36.86$  ( $c = 0.64$ , acetone);  $^1\text{H}$  NMR (500 MHz,  $\text{CDCl}_3$ )  $\delta$  1.00 (d, 3H,  $J = 7.02$  Hz), 1.60 – 1.78 (m, 12H), 2.01 (s, 4H), 9.82 (dd, 1H,  $J = 0.93, 3.46$  Hz);  $^{13}\text{C}$  NMR (125 MHz,  $\text{CDCl}_3$ )  $\delta$  7.45, 28.40, 35.18, 36.84, 39.99, 56.21, 206.76; HRMS (ESI) calculated for  $\text{C}_{13}\text{H}_{20}\text{O}$   $[\text{M}]^+$  192.15142, found 192.15038.

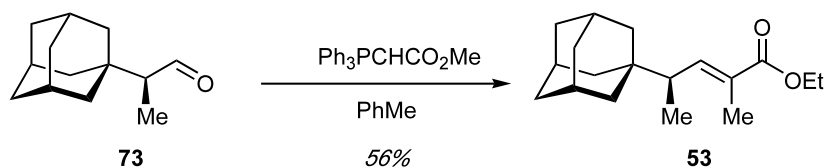



**Ester 53.** (Carbethoxyethylidene)triphenylphosphorane (0.2000 g, 0.5519 mmol) was added to a stirred solution of aldehyde **73** (0.0233 g, 0.121 mmol) in toluene (1.5 mL). The flask was equipped with a water condenser, and the mixture was stirred at reflux overnight. Ice-cold Et<sub>2</sub>O was added, and the mixture was filtered. The filtrate was collected and concentrated *in vacuo*. Purification by flash chromatography (elution with 5% ethyl acetate in hexanes) afforded 0.0187 g (55.9% yield) of pure ester **53**.  $[\alpha]_D^{24.9} = +23.47$  (c = 0.85, acetone); <sup>1</sup>H NMR (500 MHz, CDCl<sub>3</sub>) δ 0.89 (d, 3H, *J* = 6.88 Hz), 1.30 (t, 3H, *J* = 7.12 Hz), 1.45 – 1.72 (m, 12H), 1.82 (d, 3H, *J* = 1.43 Hz), 1.95 (s, 3H), 2.13 (dd, 1H, *J* = 6.87, 10.99 Hz), 4.19 (qd, 2H, *J* = 1.04, 7.11, 7.08, 7.08 Hz), 6.73 (dd, 1H, *J* = 1.44, 10.99 Hz); <sup>13</sup>C NMR (125 MHz, CDCl<sub>3</sub>) δ 12.81, 13.13, 14.47, 28.81, 35.70, 37.36, 39.84, 43.71, 60.52, 126.95, 145.44, 168.68; HRMS (ESI) calculated for C<sub>18</sub>H<sub>29</sub>O<sub>2</sub> [M+H]<sup>+</sup> 277.2168, found 277.2168.

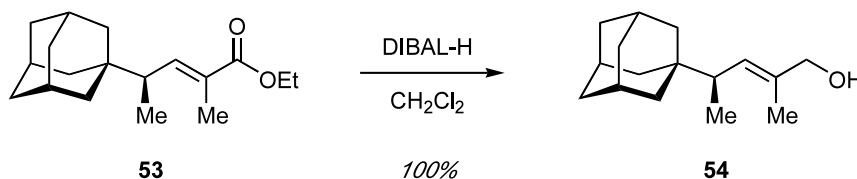

**Alcohol 54.** A stirred solution of ester **53** (0.0152 g, 0.0550 mmol) in CH<sub>2</sub>Cl<sub>2</sub> (0.55 mL) was cooled to -78°C and 0.165 mL of DIBAL solution (1 M in toluene, 0.165 mmol) was added drop wise. After stirring for 1 hour, the reaction was quenched with 0.10 mL of methanol, and stirred for 5 minutes. Then, 0.10 mL of brine solution was added, and the resulting mixture was warmed to room temperature. Sodium sulfate was added to the flask, and the solution was diluted with 3.0 mL of Et<sub>2</sub>O. The resulting solution was stirred

for 30 minutes, filtered, and washed with Et<sub>2</sub>O. The solution was dried over MgSO<sub>4</sub> and concentrated *in vacuo* to afford 0.0128 g (quantitative yield) of alcohol **54**.  $[\alpha]^{24.7}_{\text{D}} = +10.08$  (c = 1.82, acetone); <sup>1</sup>H NMR (500 MHz, CDCl<sub>3</sub>) δ 0.84 (d, 3H, *J* = 6.78 Hz), 1.29 (s, 1H), 1.43 – 1.54 (m, 6H), 1.55 – 1.71 (m, 9H), 1.94 (s, 3H), 2.01 (dq, 1H, *J* = 10.4, 6.9 Hz), 4.02 (s, 2H), 5.33 (dd, 1H, *J* = 1.25, 10.44 Hz); <sup>13</sup>C NMR (125 MHz, CDCl<sub>3</sub>) δ 14.02, 14.19, 28.88, 35.41, 37.49, 39.78, 42.35, 69.60, 129.56, 133.84; HRMS (ESI) calculated for C<sub>16</sub>H<sub>26</sub>O [M]<sup>+</sup> 234.19837, found 234.19706.

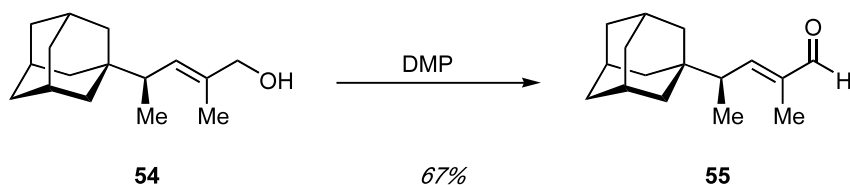

**Aldehyde 55.** A stirred solution of alcohol **55** (0.0170 g, 0.0730 mmol) in CH<sub>2</sub>Cl<sub>2</sub> (0.50 mL) was cooled to 0°C, and 0.0462 g of Dess-Martin periodinane (0.109 mmol) was added. After stirring for 5 hours, the reaction was quenched with the addition of saturated aqueous NaHCO<sub>3</sub> solution and washed with saturated aqueous Na<sub>2</sub>S<sub>2</sub>O<sub>3</sub> solution. The organic layer was separated, and the aqueous layer was extracted three times with Et<sub>2</sub>O. The combined organic extracts were dried over MgSO<sub>4</sub> and concentrated *in vacuo*. Purification by flash chromatography on silica gel (elution with 10% ethyl acetate in hexanes) afforded 0.0114 g (67.2% yield) of aldehyde **55**.  $[\alpha]^{25.6}_{\text{D}} = +6.17$  (c = 0.34, acetone); <sup>1</sup>H NMR (500 MHz, CDCl<sub>3</sub>) δ 0.96 (d, 1H, *J* = 6.9 Hz), 1.45 - 1.73 (m, 1H), 1.74 (d, 3H, *J* = 1.3 Hz), 1.98 (s, 3H), 2.34 (dq, 1H, *J* = 10.9, 6.9 Hz), 6.46 (dd, 1H, *J* = 10.8, 1.3 Hz), 9.41 (s, 1H); <sup>13</sup>C NMR (125 MHz, CDCl<sub>3</sub>) δ 9.73, 13.03, 28.75, 35.84,

37.28, 39.87, 44.01, 138.56, 158.40, 195.79; HRMS (ESI) calculated for  $C_{16}H_{24}ONa$   $[M+Na]^+$  255.1725, found 255.1725

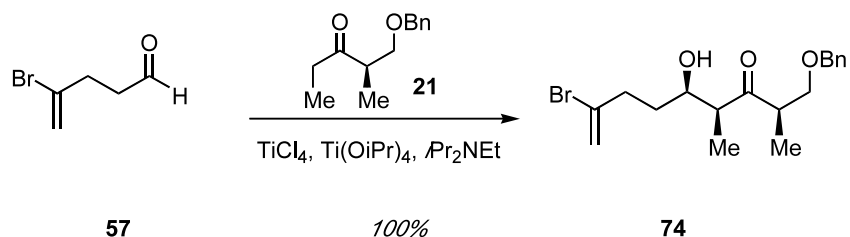

**Ketone 74.**  $Ti(OiPr)_4$  (distilled prior to use, 0.415 mL, 1.408 mmol) was added to a stirred solution of  $TiCl_4$  (distilled prior to use, 0.46 mL, 4.224 mmol) in dichloromethane (4 mL) at 0 °C. The resulting solution was stirred for 10 min, warmed to room temperature, diluted with dichloromethane (4 mL), and transferred into a stirred solution of (2*R*)-1-(benzyloxy)-2-methylpentan-3-one **21** (1.06 g, 5.12 mmol) in dichloromethane (8 mL) at -78 °C. Hunig's base (0.99 mL, 5.7 mmol) was then added dropwise, and the resulting solution was stirred for 30 min at -78 °C. A solution of aldehyde **57**<sup>8</sup> (1 mL, 6.14 mmol) in dichloromethane (3 mL) was added dropwise, and stirring was continued for 1 h. The reaction mixture was quenched with saturated aqueous solution of  $NH_4Cl$  and warmed to room temperature. Phases were separated, and the aqueous phase was extracted with diethyl ether. The combined organic layers were washed with brine, dried over  $MgSO_4$  and concentrated *in vacuo*. The residue was heated to 30 °C under vacuum (0.5 torr) for 1 hr to afford 1.89 g (quantitative yield) of ketone **74**.  $[\alpha]^{23.0}_D = -0.3$  ( $c = 1.0$ ,  $CHCl_3$ );  $^1H$  NMR (500 MHz,  $C_6D_6$ )  $\delta$  0.76 (d, 3H,  $J = 6.5$  Hz), 1.00 (d, 3H,  $J = 7.5$  Hz), 1.50-1.58 (m, 1H), 1.61-1.70 (m, 1H), 2.36-2.42 (m, 2H), 2.54-2.61 (m, 1H), 2.76-2.81 (m, 1H), 2.86 (dd, 1H,  $J = 4.5, 1.5$  Hz), 3.05 (dd, 1H,  $J = 8.5, 5.0$  Hz), 3.45 (t, 1H,  $J$

= 9.0 Hz), 3.97-4.01 (m, 1H), 4.07 (d, 1H,  $J = 12.0$  Hz), 4.12 (d, 1H,  $J = 12.0$  Hz) 5.29 (s, 2H), 7.07-7.20 (m, 5H);  $^{13}\text{C}$  NMR (125 MHz,  $\text{C}_6\text{D}_6$ ) d 9.2, 13.5, 32.6, 38.5, 44.7, 51.6, 69.2, 73.5, 117.0, 127.9, 128.3, 128.7, 134.9, 138.0, 216.5; HRMS (ESI) calculated for  $\text{C}_{18}\text{H}_{25}\text{O}_3\text{NaBr}$   $[\text{M}+\text{Na}]^+$  391.0885, found 391.0879.

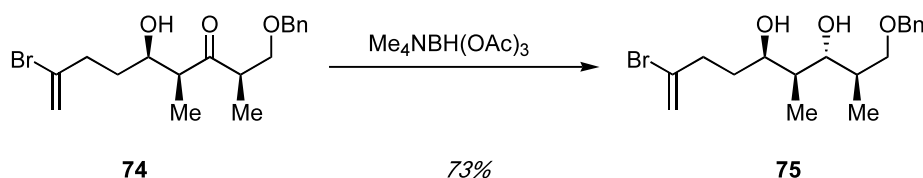

**Diol 75.** A solution of  $\text{Me}_4\text{NBH}(\text{OAc})_3$  (2.922 g, 11.12 mmol) in a mixture of MeCN (10 mL) and AcOH (10 mL) was stirred 30 min at room temperature, cooled to  $-40$  °C, and treated with a solution of ketone **74** (0.821 g, 2.224 mmol) in MeCN (7 mL). The resulting solution was stirred 22 hrs at  $-25$  °C, warmed up to room temperature, and stirred additional 1 hr. The reaction mixture was quenched with saturated aqueous potassium sodium tartrate and extracted twice with diethyl ether. The combined organic extracts were washed with saturated aqueous  $\text{NaHCO}_3$ , brine, dried over  $\text{MgSO}_4$ , and concentrated *in vacuo*. Purification by flash chromatography on silica gel (elution with hexanes:ethyl acetate 4:1) afforded 0.603 g (73% yield) of diol **75**.  $[\alpha]^{24.0}_{\text{D}} = +6.1$  ( $c = 1.4$ ,  $\text{CHCl}_3$ );  $^1\text{H}$  NMR (500 MHz,  $\text{CDCl}_3$ ) d 0.84 (d, 3H,  $J = 7.0$  Hz), 1.02 (d, 3H,  $J = 7.0$  Hz), 1.56-1.80 (m, 3H), 2.09-2.17 (m, 1H), 2.45-2.53 (m, 1H), 2.59-2.65 (m, 1H), 3.46 (t, 1H,  $J = 9.0$  Hz), 3.57 (m, 1H), 3.67 (dd, 1H,  $J = 9.0, 4.0$  Hz), 3.90 (s, 1H), 3.95 (m, 1H), 4.43 (d, 1H,  $J = 2.0$  Hz), 4.52 (s, 2H), 5.40 (s, 1H), 5.62 (s, 1H), 7.29-7.37 (m, 5H);  $^{13}\text{C}$  NMR (125 MHz,  $\text{CDCl}_3$ ) d 11.4, 13.7, 32.8, 35.5, 38.1, 38.3, 69.9, 73.6, 75.9, 82.4, 116.7, 127.7, 127.9, 128.5, 134.5, 137.1; HRMS (ESI) calculated for  $\text{C}_{18}\text{H}_{27}\text{O}_3\text{NaBr}$   $[\text{M}+\text{Na}]^+$  393.1041, found 393.1032.

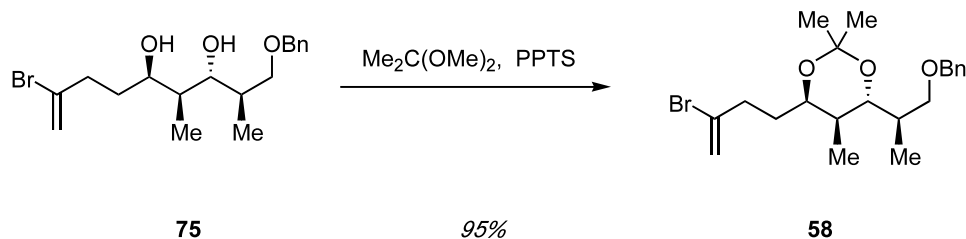

**Acetonide 58.** A solution of diol **75** (0.05 g, 0.1347 mmol) and 2,2-dimethoxypropane (0.08 mL, 0.674 mmol) in dichloromethane (1 mL) was treated with PPTS (several crystals). The reaction mixture was stirred 3 hrs at room temperature and concentrated *in vacuo*. Purification by flash chromatography on silica gel (elution with hexanes:ethyl acetate 9:1) afforded 0.052 g (95% yield) of acetonide **58**.  $[\alpha]^{24.0}_{\text{D}} = -6.0$  ( $c = 1.0$ ,  $\text{CHCl}_3$ );  $^1\text{H NMR}$  (500 MHz,  $\text{CDCl}_3$ )  $\delta$  0.87 (d, 3H,  $J = 6.5$  Hz), 1.03 (d, 3H,  $J = 7.0$  Hz), 1.28 (s, 3H), 1.31 (s, 3H), 1.60-1.66 (m, 2H), 1.85 (m, 1H), 1.96 (m, 1H), 2.41 (m, 1H), 2.55 (m, 1H), 3.25 (dd, 1H,  $J = 7.0, 5.5$  Hz), 3.35 (dd, 1H,  $J = 9.0, 7.0$  Hz), 3.58 (dd, 1H,  $J = 9.0, 5.0$  Hz), 3.74 (m, 1H), 4.47 (d, 1H,  $J = 12.0$  Hz), 4.51 (d, 1H,  $J = 12.0$  Hz), 5.42 (s, 1H), 5.60 (s, 1H), 7.25-7.39 (m, 5H);  $^{13}\text{C NMR}$  (125 MHz,  $\text{CDCl}_3$ )  $\delta$  12.6, 14.4, 23.5, 25.6, 29.1, 36.9, 37.7, 38.0, 68.0, 72.2, 73.1, 76.5, 100.4, 116.9, 127.4, 127.6, 128.3, 134.4, 138.8; ; HRMS (ESI) calculated for  $\text{C}_{21}\text{H}_{31}\text{O}_3\text{NaBr}$   $[\text{M}+\text{Na}]^+$  433.1354, found 433.1356.

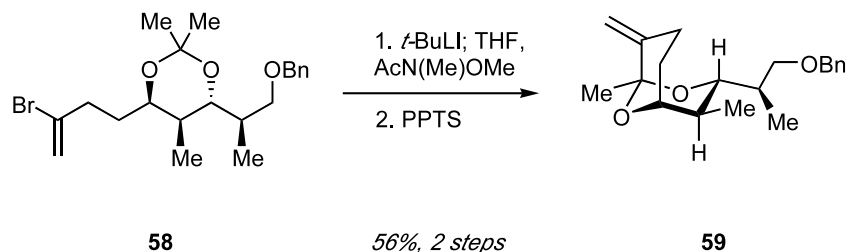

**Alkene 59.** A solution of acetonide **58** (0.023 g, 0.056 mmol) in THF (1 mL) was treated dropwise with a solution of *tert*-BuLi (0.065 mL, 0.112 mmol, 1.7 M in pentane) at -78

°C. The reaction mixture was stirred 5 min and treated with *N*-methoxy-*N*-methylacetamide (0.012 mL, 0.112 mmol). The resulting solution was stirred 10 min, quenched with aqueous HCl (1 N solution) and warmed up to room temperature. The resulting solution was extracted with Et<sub>2</sub>O, and the organic phase was dried over anhydrous MgSO<sub>4</sub> and concentrated *in vacuo*. The resulting ketone was dissolved in MeOH (1 mL) and treated with PPTS (several crystals). The reaction mixture was stirred overnight and evaporated. Purification by preparative TLC on silica gel (development with Hexanes:AcOEt 4:1) afforded 0.01 g (56% yield over two steps) of alkene **59**.  $[\alpha]^{24.0}_{\text{D}} = +10.8$  ( $c = 1.0$ , CHCl<sub>3</sub>); <sup>1</sup>H NMR (500 MHz, d) 0.71 (d, 3H,  $J = 7.0$  Hz), 1.02 (d, 3H,  $J = 7.0$  Hz), 1.38 (s, 3H), 1.54 (m, 1H), 1.93-2.05 (m, 2H), 2.15-2.24 (m, 2H), 2.26-2.34 (m, 1H), 3.30 (dd, 1H,  $J = 9.0, 7.5$  Hz), 3.56 (dd, 1H,  $J = 11.0, 2.0$  Hz), 3.73 (dd, 1H,  $J = 9.0, 5.5$  Hz), 4.06 (m, 1H), 4.48 (d, 1H,  $J = 11.5$  Hz), 4.52 (d, 1H,  $J = 11.5$  Hz), 4.93 (s, 1H), 5.01 (s, 1H), 7.26-7.35 (m, 5H); <sup>13</sup>C NMR (125 MHz, CDCl<sub>3</sub>) d 12.0, 15.6, 21.4, 27.3, 28.0, 34.1, 34.9, 70.7, 71.5, 73.1, 74.6, 98.6, 110.0, 127.3, 127.4, 128.3, 138.9, 150.6; HRMS (ESI) calculated for C<sub>20</sub>H<sub>28</sub>O<sub>3</sub>Na [M+Na]<sup>+</sup> 339.1936, found 339.1938.

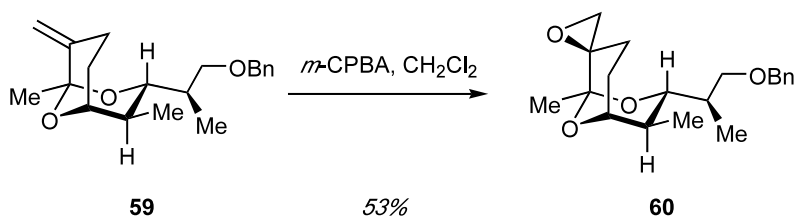

**Epoxide 60.** A solution of alkene **59** (0.127 g, 0.4 mmol) in dichloromethane (2 mL) was treated with *m*-CPBA (0.184 g, 0.8 mmol, 75% purity). The reaction mixture was stirred

overnight and diluted with Et<sub>2</sub>O. The resulting suspension was washed with aqueous NaOH (1 N solution), saturated aqueous Na<sub>2</sub>SO<sub>3</sub>, and brine. The organic phase was dried over anhydrous MgSO<sub>4</sub> and concentrated *in vacuo*. Purification by flash chromatography on silica gel (elution with hexanes:ethyl acetate 9:1) afforded 0.07 g (53% yield) of epoxide **60**.  $[\alpha]^{23.0}_{\text{D}} = +52.5$  ( $c = 0.6$ , CHCl<sub>3</sub>); <sup>1</sup>H NMR (500 MHz, d) 0.80 (d, 3H,  $J = 7.0$  Hz), 1.03 (d, 3H,  $J = 7.0$  Hz), 1.18 (s, 3H), 1.67-1.89 (m, 3H), 2.04-2.14 (m, 2H), 2.30 (m, 1H), 2.64 (d, 1H,  $J = 5.5$  Hz), 2.78 (d, 1H,  $J = 5.0$  Hz), 3.27 (dd, 1H,  $J = 9.0, 7.5$  Hz), 3.70 (dd, 1H,  $J = 9.0, 5.5$  Hz), 3.78 (d, 1H,  $J = 11.0$  Hz), 4.02 (m, 1H), 4.47 (d, 1H,  $J = 12.0$  Hz), 4.50 (d, 1H,  $J = 12.0$  Hz), 7.25-7.37 (m, 5H); <sup>13</sup>C NMR (125 MHz, CDCl<sub>3</sub>) d 12.8, 15.9, 20.7, 22.7, 27.1, 34.2, 35.0, 51.6, 58.9, 70.5, 71.3, 73.1, 76.4, 98.2, 127.42, 127.43, 128.3, 138.7; HRMS (ESI) calculated for C<sub>20</sub>H<sub>28</sub>O<sub>4</sub>Na [M+Na]<sup>+</sup> 355.1885, found 355.1882.

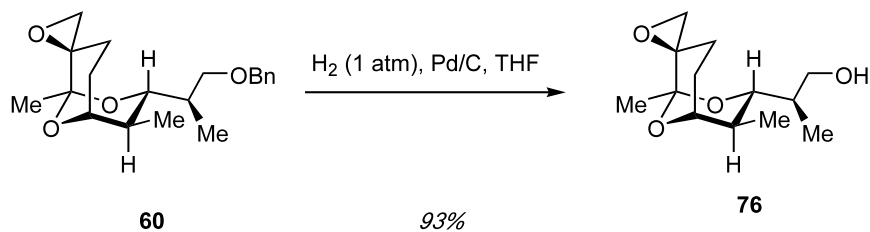

**Alcohol 76.** A mixture of epoxide **60** (0.06 g, 0.18 mmol) and palladium on carbon (0.05 g, 10% w/w) in THF (1.8 mL) was vigorously stirred under hydrogen atmosphere overnight. The resulting suspension was filtered through Celite and concentrated *in vacuo*. Purification by flash chromatography on silica gel (elution with hexanes:ethyl acetate 1:1) afforded 0.04 g (93% yield) of alcohol **74**.  $[\alpha]^{24.3}_{\text{D}} = +67.9$  ( $c = 2.0$ , CHCl<sub>3</sub>); <sup>1</sup>H NMR (500 MHz, d) 0.77 (d, 3H,  $J = 7.0$  Hz), 1.09 (d, 3H,  $J = 7.0$  Hz), 1.18 (s, 3H),

1.63-1.68 (m, 1H), 1.72-1.87 (m, 3H), 2.10 (m, 1H), 2.31 (m, 1H), 2.64 (d, 1H,  $J = 5.0$  Hz), 2.76 (d, 1H,  $J = 5.0$  Hz), 3.50 (dd, 1H,  $J = 11.5, 4.5$  Hz), 3.85-3.90 (m, 2H), 4.06 (m, 1H);  $^{13}\text{C}$  NMR (125 MHz,  $\text{CDCl}_3$ ) d 12.5, 15.2, 20.5, 22.8, 26.7, 34.6, 35.0, 51.4, 58.5, 63.3, 70.2, 78.6, 98.5; HRMS (ESI) calculated for  $\text{C}_{13}\text{H}_{22}\text{O}_4\text{Na}$   $[\text{M}+\text{Na}]^+$  265.1416, found 265.1418.

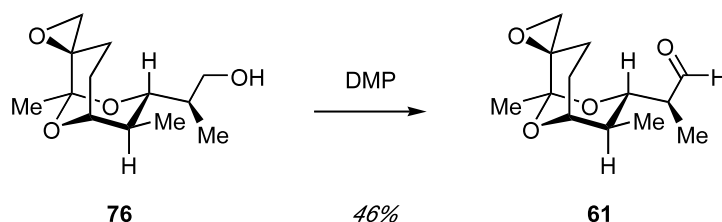

**Aldehyde 61.** A mixture of alcohol **76** (0.035 g, 0.157 mmol) and  $\text{NaHCO}_3$  (0.2 g, 2.4 mmol) in dichloromethane (1.5 mL) was treated with Dess-Martin periodinane (0.1 g, 0.24 mmol) at room temperature. After 2 hrs, the reaction was quenched with saturated aqueous solution of  $\text{Na}_2\text{S}_2\text{O}_3$  and saturated aqueous solution of  $\text{NaHCO}_3$  and stirred for 15 min. Phases were separated, and the aqueous phase was extracted with diethyl ether. The combined organic layers were dried over  $\text{MgSO}_4$  and concentrated *in vacuo*. Purification by flash chromatography on silica gel (elution with hexanes:ethyl acetate 4:1) afforded 0.016 g (46% yield) of aldehyde **61**.  $[\alpha]_{\text{D}}^{23.4} = +88.5$  ( $c = 1.5$ ,  $\text{CHCl}_3$ );  $^1\text{H}$  NMR (500 MHz, d) 0.82 (d, 3H,  $J = 7.0$  Hz), 1.18 (s, 3H), 1.20 (d, 3H,  $J = 7.0$  Hz), 1.75-1.85 (m, 1H), 2.15 (m, 1H), 2.23 (m, 1H), 2.45 (m, 1H), 2.64 (d, 1H,  $J = 5.0$  Hz), 2.80 (d, 1H,  $J = 5.0$  Hz), 4.06 (m, 2H), 9.77 (d, 1H,  $J = 2.5$  Hz);  $^{13}\text{C}$  NMR (125 MHz,  $\text{CDCl}_3$ ) d 11.4, 12.7, 20.8, 22.4, 27.4, 34.6, 47.9, 51.2, 58.1, 70.2, 76.3, 98.4, 204.3; HRMS (ESI) calculated for  $\text{C}_{13}\text{H}_{20}\text{O}_4\text{Na}$   $[\text{M}+\text{Na}]^+$  263.1259, found 263.1255.



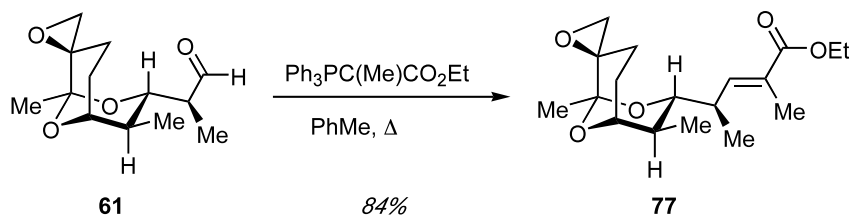

**Ester 77.** A solution of aldehyde **61** (0.015 g, 0.0625 mmol) and (carbethoxyethylidene)triphenylphosphorane (0.113 g, 0.313 mmol) in toluene (0.6 mL) was heated at 110 °C for 2 hrs. Purification by flash chromatography on silica gel (elution with hexanes:ethyl acetate 4:1) afforded 0.017 g (84% yield) of ester **77**.  $[\alpha]^{24.1}_{\text{D}} = +41.2$  ( $c = 1.7$ ,  $\text{CHCl}_3$ );  $^1\text{H NMR}$  (500 MHz,  $\text{CDCl}_3$ )  $\delta$  0.74 (d, 3H,  $J = 7.0$  Hz), 1.05 (d, 3H,  $J = 7.0$  Hz), 1.20 (s, 3H), 1.28 (m, 3H), 1.71-1.97 (m, 7H), 2.09 (m, 1H), 2.63 (d, 1H,  $J = 5.0$  Hz), 2.71 (m, 1H), 2.80 (d, 1H,  $J = 5.0$  Hz), 3.80 (d, 1H,  $J = 11.0$  Hz), 3.98 (m, 1H), 4.19 (m, 2H), 6.85 (d, 1H,  $J = 10.0$  Hz);  $^{13}\text{C NMR}$  (125 MHz,  $\text{CDCl}_3$ )  $\delta$  12.5, 12.7, 14.2, 16.7, 20.9, 22.5, 27.4, 34.9, 35.0, 51.3, 58.5, 60.5, 70.3, 77.0, 98.1, 128.0, 141.9, 168.1; HRMS (ESI) calculated for  $\text{C}_{18}\text{H}_{28}\text{O}_5\text{Na}$   $[\text{M}+\text{Na}]^+$  347.1834, found 347.1835.

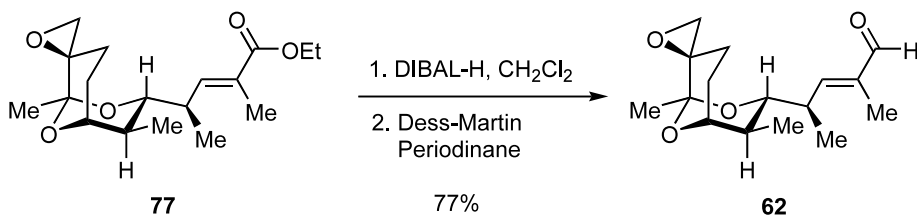

**Aldehyde 62.** A stirred solution of ester **77** (0.015 g, 0.046 mmol) in dichloromethane (0.5 mL) was treated with DIBAL-H (0.11 mL of 1 M solution in toluene, 0.11 mmol) at -78 °C. After 1 h, the reaction was quenched with MeOH (0.1 mL), then treated with brine (0.1 mL). The resulting mixture diluted with diethyl ether, dried over anhydrous  $\text{MgSO}_4$  and concentrated *in vacuo*. The resulting crude alcohol was dissolved in

dichloromethane (0.5 mL) and treated with solid NaHCO<sub>3</sub> (0.077 g, 0.91 mmol). The resulting suspension was treated with Dess-Martin periodinane (0.039 g, 0.092 mmol), stirred for 30 min at room temperature, and quenched with saturated aqueous solution of Na<sub>2</sub>S<sub>2</sub>O<sub>3</sub> and saturated aqueous solution of NaHCO<sub>3</sub>. After 15 min, the reaction mixture was extracted twice with diethyl ether. The combined organic extracts were washed with brine, dried over MgSO<sub>4</sub> and concentrated *in vacuo*. Purification by flash chromatography on silica gel (elution with hexanes:ethyl acetate 4:1) afforded 0.01 g (77% yield over two steps) of aldehyde **62**.  $[\alpha]_{\text{D}}^{22.8} = +39.8$  ( $c = 1.7$ , CHCl<sub>3</sub>); <sup>1</sup>H NMR (500 MHz, d) 0.77 (d, 3H,  $J = 7.0$  Hz), 1.12 (d, 3H,  $J = 7.0$  Hz), 1.24 (s, 3H), 1.71-1.85 (m, 6H), 1.89 (m, 1H), 2.14 (m, 1H), 2.65 (d, 1H,  $J = 5.0$  Hz), 2.82 (d, 1H,  $J = 5.0$  Hz), 2.93 (m, 1H), 3.87 (dd, 1H,  $J = 11.0, 2.0$  Hz), 4.00 (m, 1H), 6.66 (d, 1H,  $J = 10.0$  Hz), 9.43 (s, 1H); <sup>13</sup>C NMR (125 MHz, CDCl<sub>3</sub>) d 9.3, 12.6, 16.7, 21.0, 22.5, 27.2, 35.1, 35.2, 51.3, 58.4, 70.2, 77.0, 98.3, 139.4, 154.2, 195.4; HRMS (ESI) calculated for C<sub>16</sub>H<sub>24</sub>O<sub>4</sub>Na [M+Na]<sup>+</sup> 303.1572, found 303.1573.

## References

- <sup>1</sup> Paterson, I.; and Lister, M. A. *Tetrahedron Lett.* **1988**, 29, 585-588.
- <sup>2</sup> Yang, K. S.; Lee, W. D.; Pan J. F.; and Chen, K. *J. Org. Chem.* **2003**, 68, 915-919.
- <sup>3</sup> Widmer, U. *Synthesis* **1987**, 568-570.
- <sup>4</sup> Schlessinger, R. H.; and Graves, D. *Tetrahedron Lett.* **1987**, 28, 4381-4384.
- <sup>5</sup> Roush, W. R.; Bennett, C. E.; and Roberts, S. E. *J. Org. Chem.* **2001**, 66, 6389-6393.
- <sup>6</sup> Ley, S. V.; Woodward, P. R. *Tetrahedron Lett.* **1987**, 28, 345-346.
- <sup>7</sup> Elbe, T. E.; Large, C. M.; DeVries, W. H.; Crum, G. F.; and Shell, J. W. *Antibiot. Ann.* **1955- 1956**, 893-896.
- <sup>8</sup> Kozmin, S. A. *Org. Lett.* **2001**, 3, 755-758.
- <sup>9</sup> Schmid, R.; and Hansen, H. J. *Helv. Chim. Acta* **1990**, 73, 1258-1275.

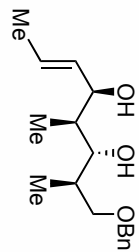

17

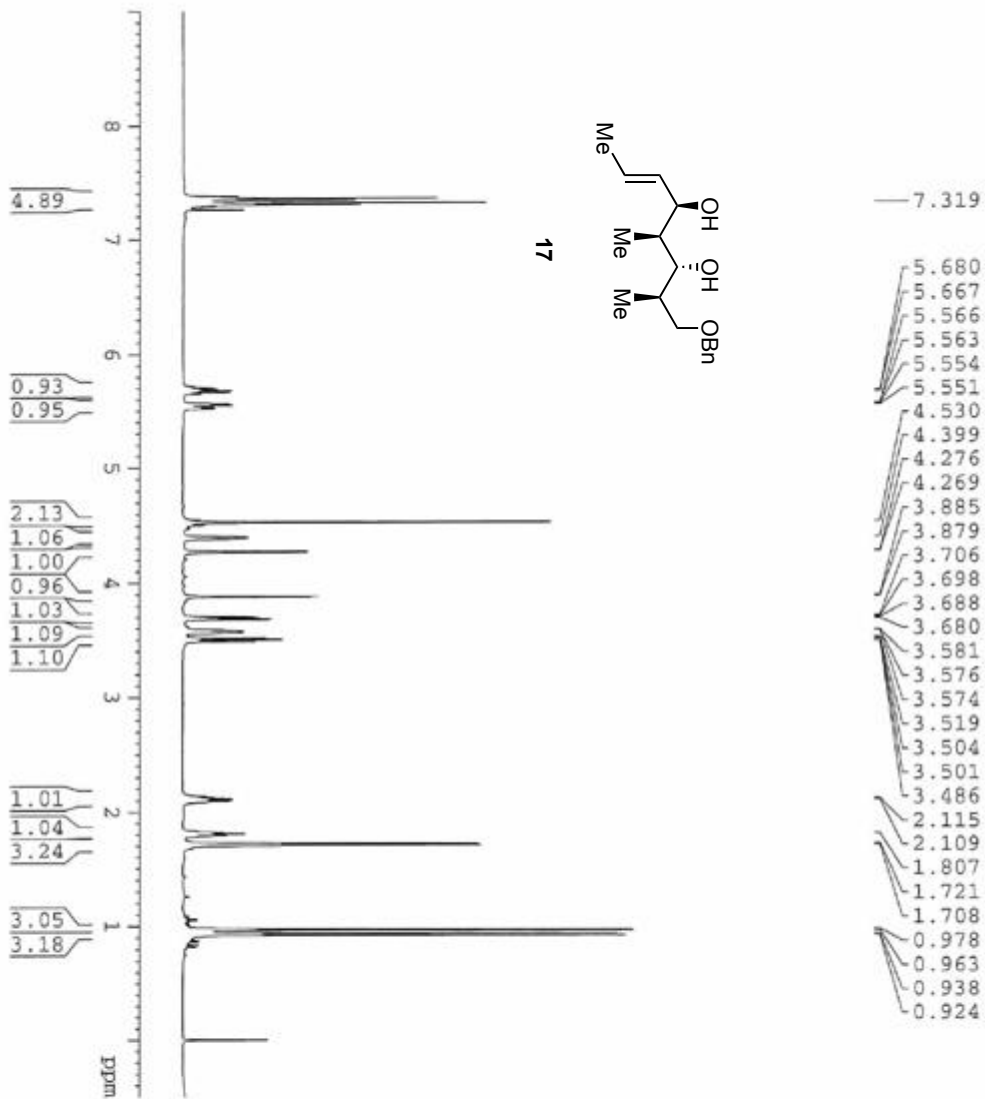

```

NAME          ac11051
EXPNO         2
PROCNO        1
Date_         20080422
Time         15.10
INSTRUM       spect
PROBHD        5 mm PBOHRP 1H/
PULPROG       zgpg30
TD            44998
SOLVENT       CDCl3
NS            8
DS            0
SWH           7500.000 Hz
FIDRES        0.16674 Hz
AQ            2.9999166 sec
RG            71.8
RG            71.8
DW            66.667 usec
DE            71.43 usec
TE            295.8 K
TR            2.00000000 sec
D1            1
TD0           1

***** CHANNEL f1 *****
NUC1          1H
P1            12.00 usec
PL1          0.00 dB
PULPROG       zgpg30
SFO1          500.135009 MHz
SI            16384
SF            500.130081 MHz
WDW           EM
SSB           0
LB            0.30 Hz
GB            0
PC            1.00
  
```

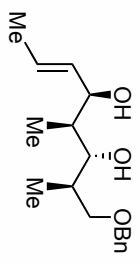

17

- 137.406
- 131.906
- 128.552
- 127.947
- 127.733
- 126.327
  
- 81.346
- 75.192
- 73.693
- 73.326
  
- 39.608
- 35.538
  
- 17.806
- 14.224
- 11.780

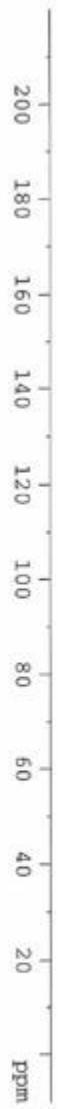

```

NAME          rt11051
EXPNO         3
PROCNO        1
Date_         20080422
Time         15.18
INSTRUM       spect
PROBHD        5 mm PABCP 1H/
PULPROG       zgpg
TD            65786
SOLVENT       CDCl3
NS            28
DS            4
SWH           32894.730 Hz
FIDRES        0.300026 Hz
AQ            0.9999972 sec
RG            2050
RG            2050
DW            15.200 usec
DE            6.00 usec
TE            296.2 K
D1            4.00000000 sec
D11           0.03000000 sec
TD0           1

===== CHANNEL f1 =====
NUC1          13C
P1            8.00 usec
PL1           1.00 dB
PL1W          72.42802429 W
SFO1          125.7728799 MHz

===== CHANNEL f2 =====
NAME         WAIT216
NUC2         1H
PCPD2        80.00 usec
PL2          0.00 dB
PL12         16.50 dB
PL13         17.00 dB
PL2W         24.54113007 W
PL12W        0.54940748 W
PL13W        0.48965994 W
SFO2         500.1325006 MHz
SI           131072
SF           125.7577890 MHz
WDW          EM
SSB          0
LB           0.30 Hz
GB           0
PC           1.40

```

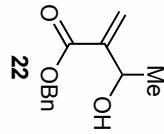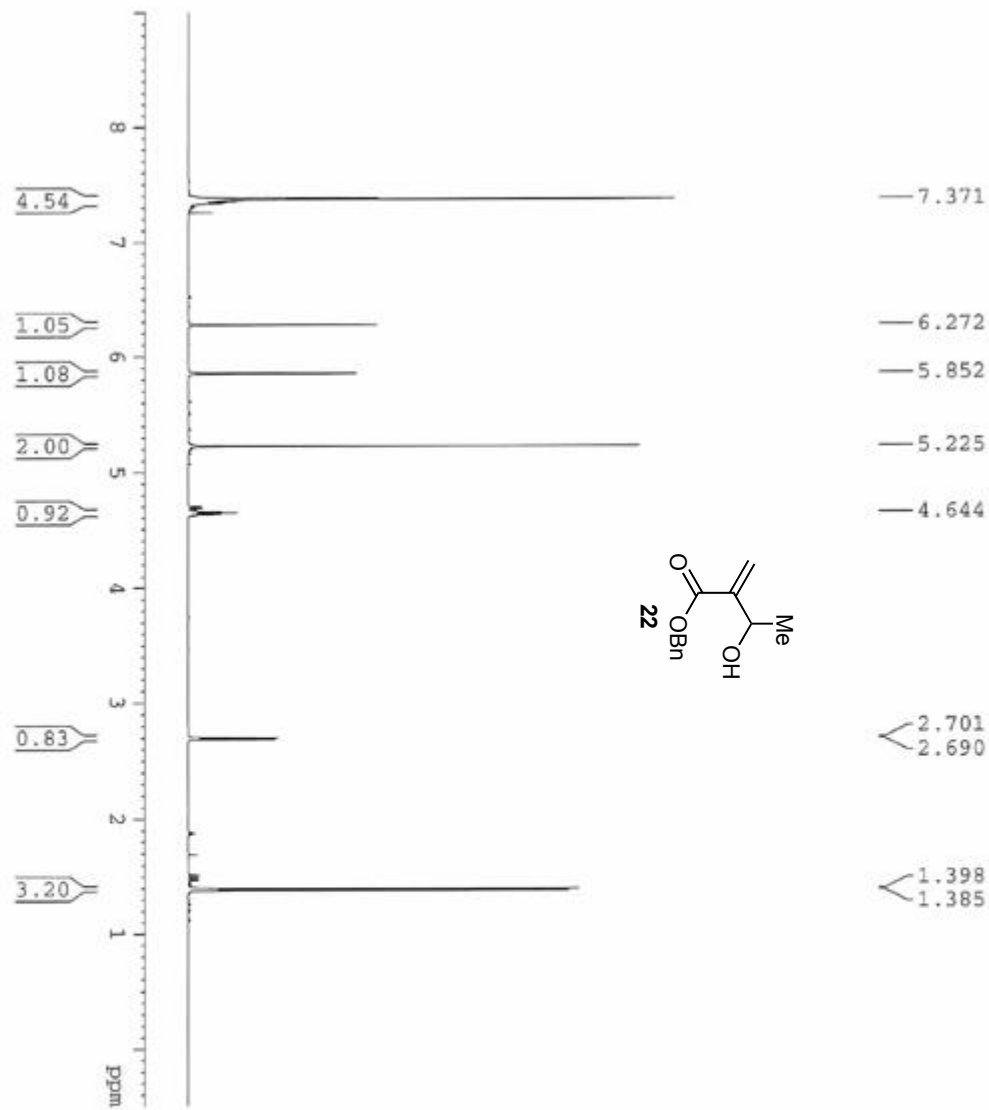

```

NAME          RL12009
EXPNO         2
PROCNO        1
Date_         20090224
Time          10.34
INSTRUM       5 mm PACTP 1H/
PROBHD        QNP 1H/
PULPROG       zgpg30
TD            44998
SOLVENT       CDCl3
NS            8
DS            0
SNR           7500.000 Hz
FIDRES        0.166674 Hz
AQ            2.9999166 sec
RG            71.8
RW           66.667 usec
DE           71.43 usec
TE           294.6 K
D1            1.000000000 sec
TD0           1

===== CHANNEL f1 =====
NUC1          1H
P1            12.00 usec
PL1           0.00 dB
PL1W         24.54113007 W
SFO1         500.1335009 MHz
SI           16384
SF           500.1300094 MHz
WDW          EM
SSB           0
LB           0.30 Hz
GB           0
PC           1.00
  
```

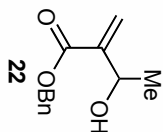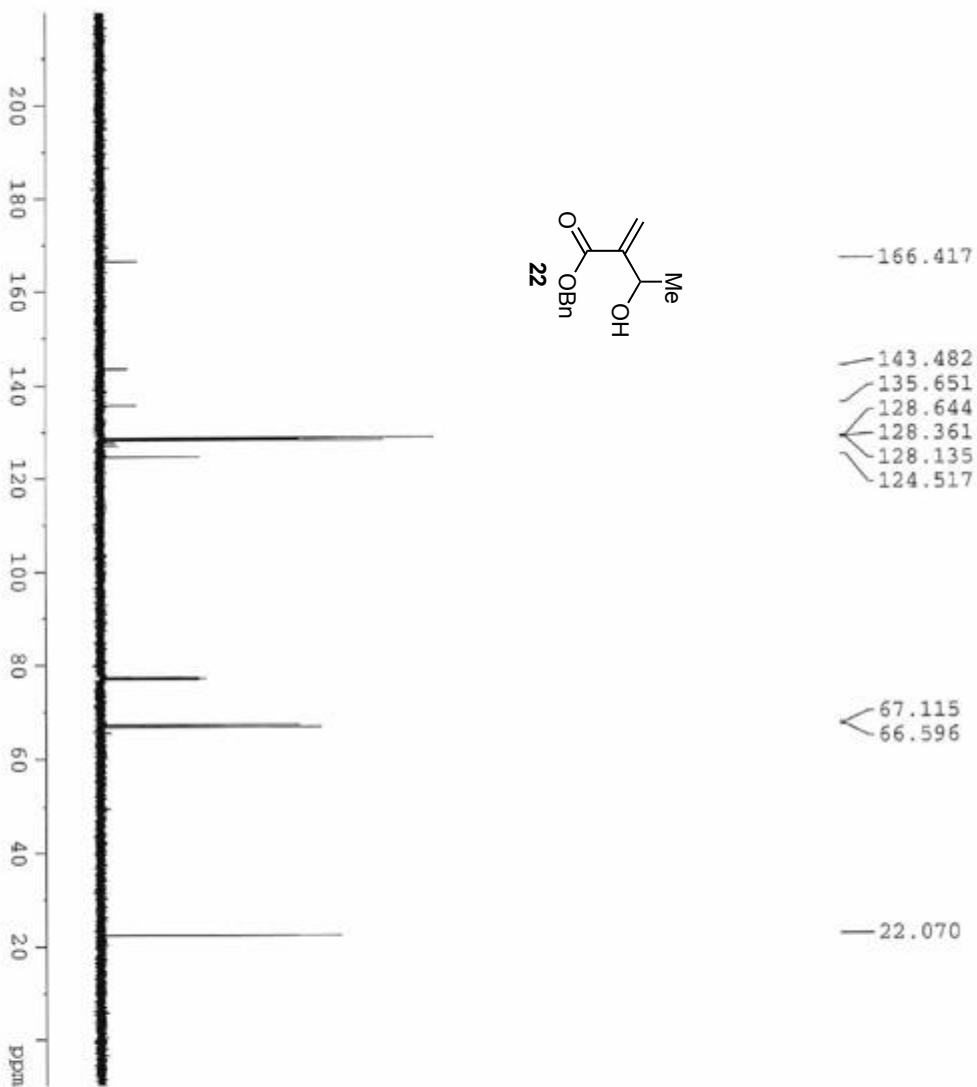

```

NAME          #12009
EXPNO         21
PROCNO        1
Date_         20090224
Time          11.01
INSTRUM       spect
PROBHD        5 mm PABNP 1H/
PULPROG       zgpg30
SD            65748
SOLVENT       CDCl3
NS            31
DS            4
SNH           32894.738 Hz
FIDRES        0.500026 Hz
AQ            0.999972 sec
RG            2050
RW            15.200 usec
DE            6.00 usec
TE            295.1 K
D1            4.00000000 sec
D11           0.01000000 sec
TD0           1

===== CHANNEL f1 =====
NUC1          13C
P1            8.00 usec
PL1           1.00 dB
SFO1         72.42802429 MHz
SFO2         125.7728799 MHz

===== CHANNEL f2 =====
CPDPRG2       waltz16
NUC2          1H
PCPD2         80.00 usec
PL2           0.00 dB
PL12         16.50 dB
PL13         17.00 dB
PL2W         24.54111007 W
PL12W        C.54940748 W
PL13W        C.48965994 W
SFO2         500.1325006 MHz
SI            131072
SF           125.7577890 MHz
WDM          RM
SSB           0
LB            0.30 Hz
GB            0
PC            1.40

```

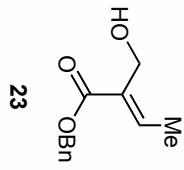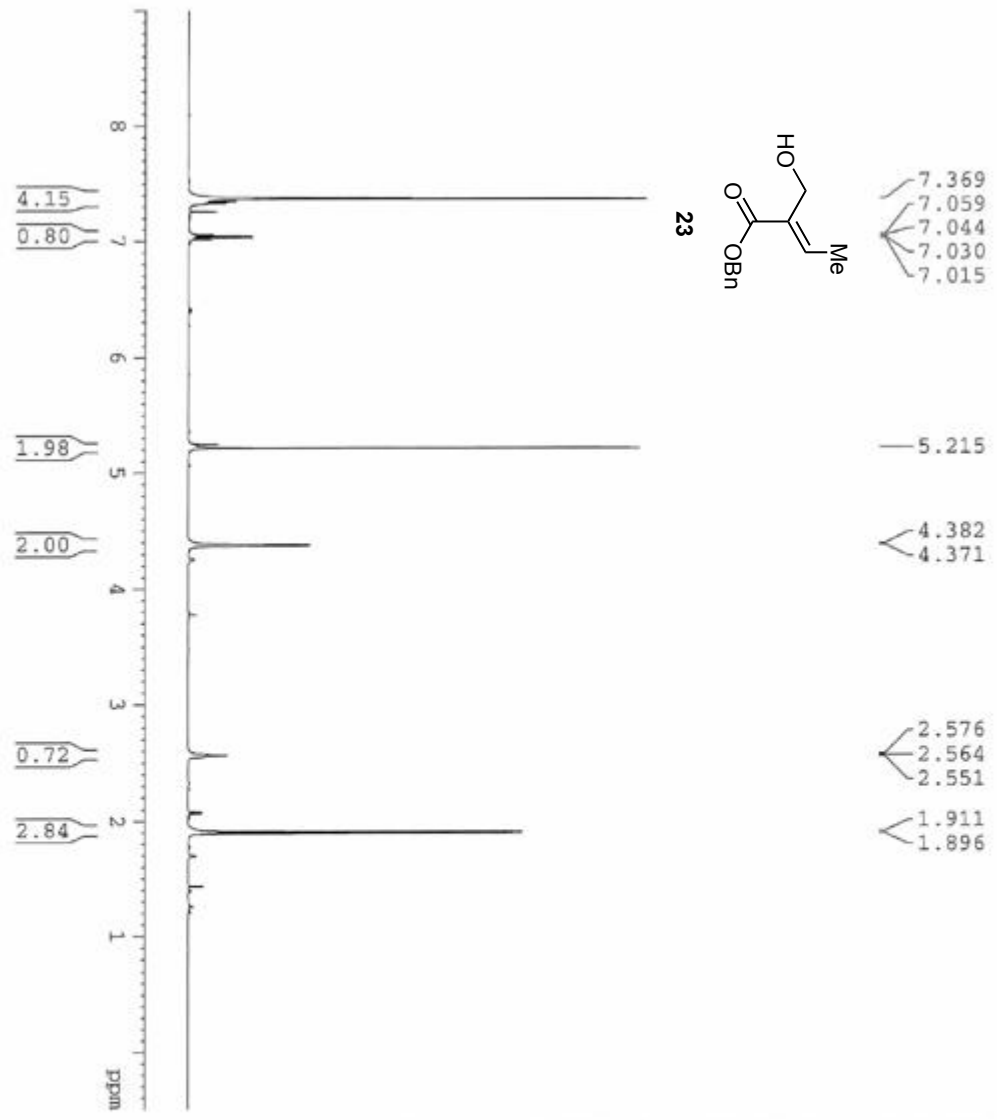

```

NAME          811288
EXPNO         1
PROCNO       1
Date_        20090218
Time         15:59
INSTRUM      spect
PROBHD       5 mm PNOUP IH/
PULPROG      zgpg
TD           44998
SOLVENT      CDCl3
NS           8
DS           0
SWH          7500.000 Hz
FIDRES      0.166674 Hz
AQ          2.9999166 sec
RG           144
TDW         66.667 usec
DE          71.43 usec
TE          294.6 K
D1          3.0000000 sec
TD0         1

***** CHANNEL f1 *****
NUC1         1H
P1          12.00 usec
PL1         0.00 dB
PL1W        24.54113007 W
SFO1        500.135099 MHz
SI          16384
SF          500.130081 MHz
WDW         KM
SSB         0
GB          0.30 Hz
PC          1.00
  
```



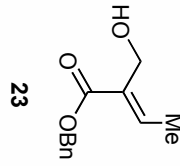

167.208  
 141.070  
 135.819  
 131.730  
 128.583  
 128.255  
 128.078  
 66.445  
 56.935  
 14.199

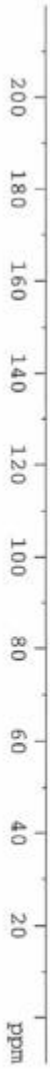

```

NAME          9t11286
EXTNO         11
PROCNO        1
DATE_         20090216
TIME         16.04
INSTRUM       5 mm PNOUP 1H/
PROBHD        zgpg3
PULPROG       zgpg3
TD            65786
SOLVENT       CDCl3
NS            47
DS            4
SWH           32894.738 MHz
FIDRES        0.500026 Hz
AQ            0.9999972 sec
RG            2050
DF            15.200 usec
DE            6.00 usec
TE            295.2 K
D1            4.00000000 sec
D11           0.03000000 sec
TD0           1

===== CHANNEL f1 =====
NUC1          13C
P1            8.00 usec
PL1           1.00 dB
PL1W          72.42802429 W
SFO1          125.7728799 MHz

===== CHANNEL f2 =====
CPDPRG2      waltz16
NUC2          1H
PCPD2        80.00 usec
PL2           0.00 dB
PL2W         16.50 dB
PL3          17.00 dB
PL3W         24.54113007 W
PL2W         0.54940748 W
PL1W         0.48965994 W
SFO2          500.1325006 MHz
SI            111072
SF            125.7577951 MHz
WDW           EM
SSB           0
LB            0.30 Hz
GB            0
PC            1.40
  
```

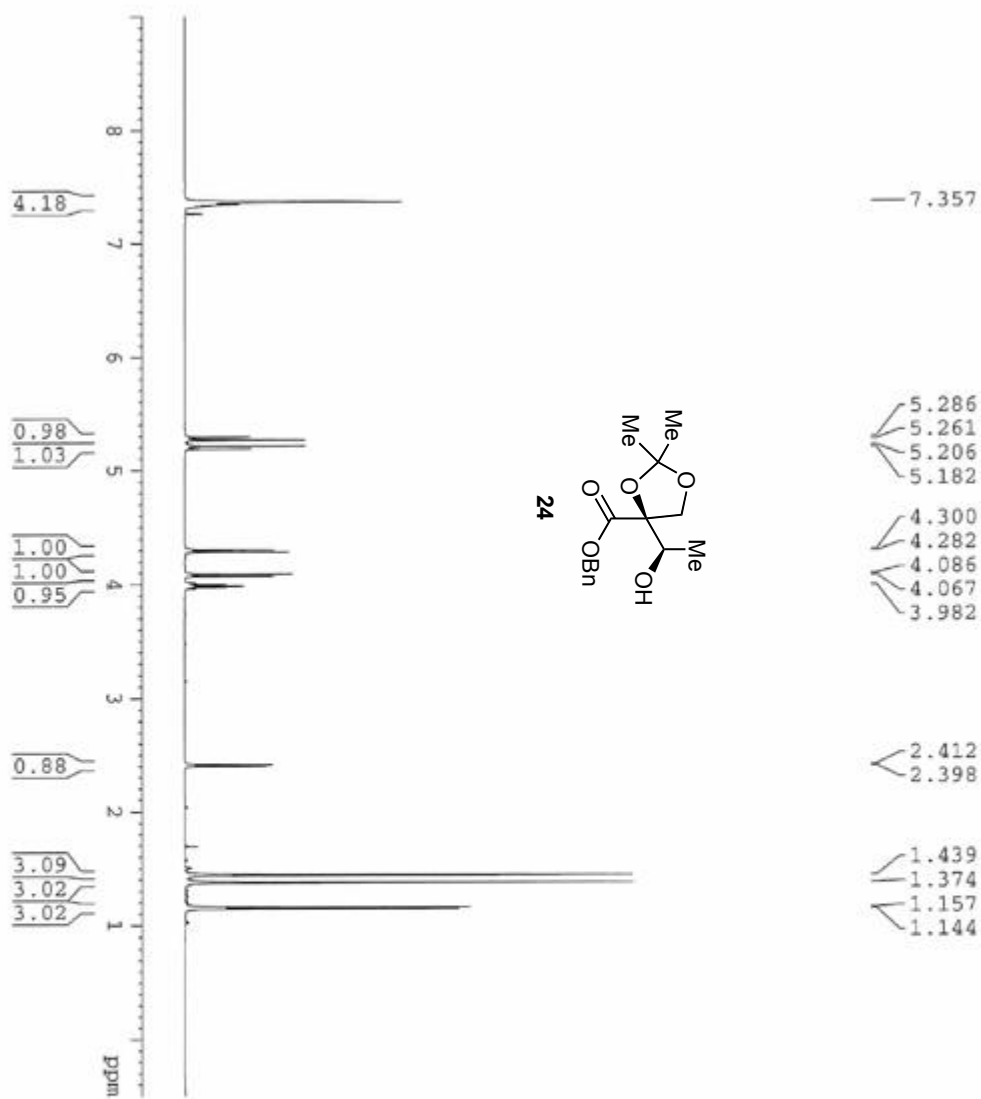

```

NAME          RL12013
EXPNO         1
PROCNO        1
DATE_         20090213
TIME          15.53
INSTRUM       spect
PROBHD        5 mm PACTNP 1H/
PULPROG       zgpg30
TD            44998
SOLVENT       CDCl3
NS            8
DS            0
SWH           7500.000 Hz
FIDRES        0.16674 Hz
AQ            2.9999166 sec
RG            64
TM            66.667 usec
DE            71.43 usec
TE            294.6 K
IR           3.00000000 sec
DI            1
TD0           1

===== CHANNEL f1 =====
NUC1          1H
P1            12.00 usec
PL1           0.00 dB
PL1W          24.54113007 W
SFO1          500.133009 MHz
SI            16384
SF            500.1300086 MHz
MPCW          EM
SSB           0
LB            0.30 Hz
GB            0
PC            1.00

```



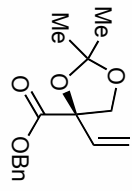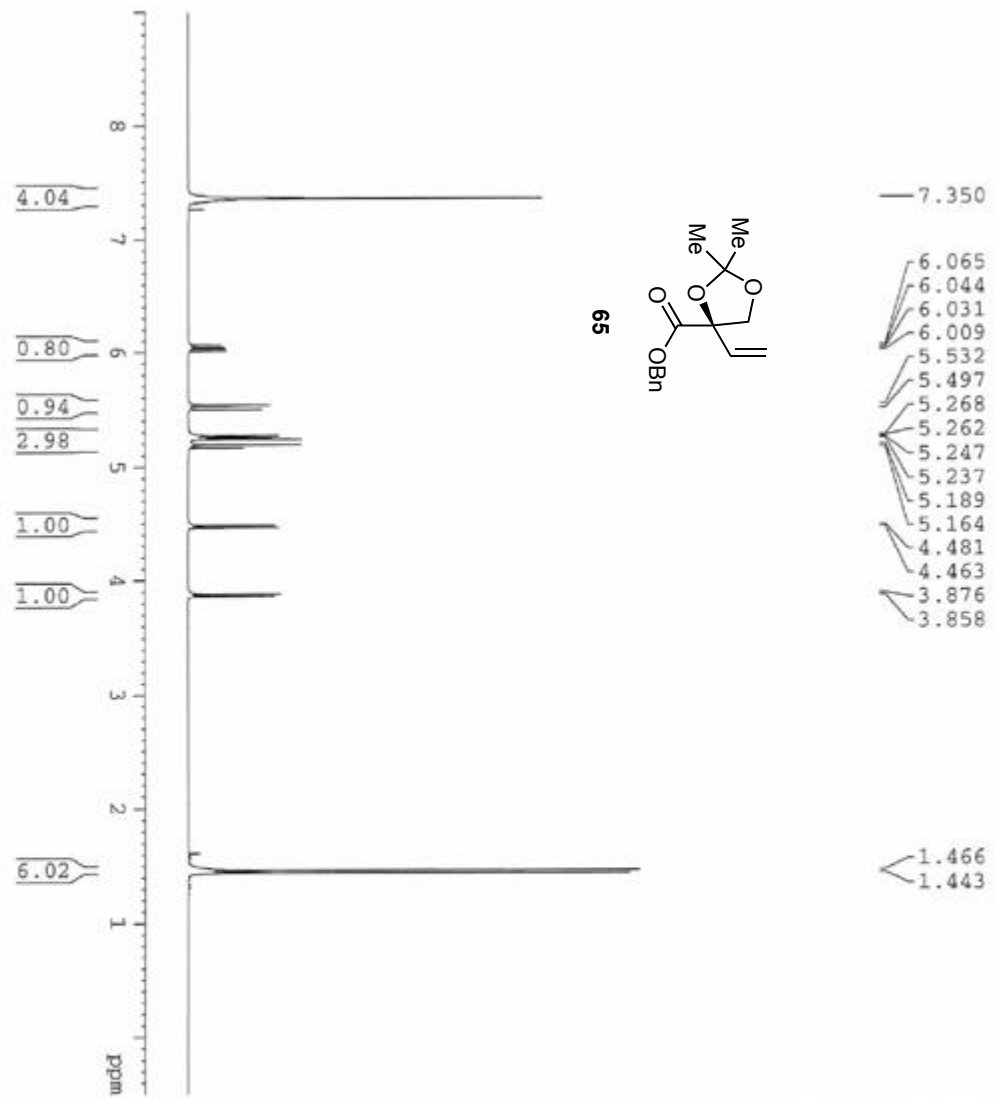

```

NAME          et12018
EXPNO         2
PROCNO        1
DATE_         20090118
TIME         12.10
INSTRUM       spect
PROBHD        5 mm P/QNP 1H/
PULPROG       zgpg30
TD            65536
SOLVENT       CDCl3
NS            8
DS            0
SWH           7500.000 Hz
FIDRES        0.166674 Hz
AQ           2.9999166 sec
RG            71.8
RG            71.8
AQ           66.667 usec
SFO1          500.135009 MHz
SF           500.1300075 MHz
WDW           EM
SSB           0
LB            0.30 Hz
GB            0
PC            1.00
  
```

```

***** CHANNEL f1 *****
NUC1          1H
P1           12.00 usec
PL1          0.00 dB
PULP1        24.54113007 u
SFO1          500.135009 MHz
SI           16384
SF           500.1300075 MHz
WDW           EM
SSB           0
LB            0.30 Hz
GB            0
PC            1.00
  
```

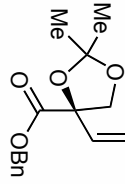

65

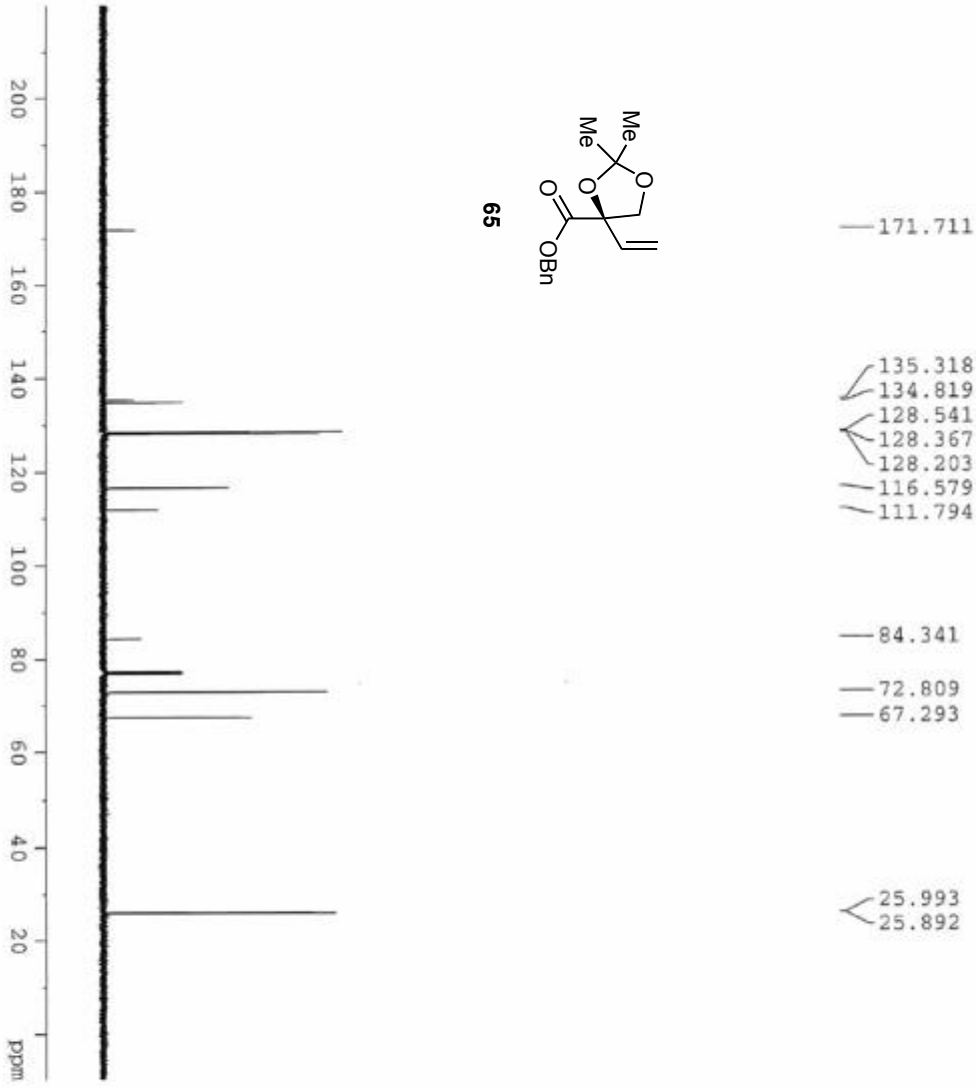

```

NAME          act12018
EXPNO         21
PROCNO       1
Date_         20090318
Time         12.17
INSTRUM      spect
PROBHD       5 mm ZBOREX 1H/
PULPROG      zgpg30
TD            65786
SOLVENT      CDCl3
NS            47
DS            4
SWH           32894.738 Hz
FIDRES       0.500026 Hz
AQ           0.9999972 sec
RG           2050
AQ           15.200 usec
DE           6.00 usec
TE           295.2 K
D1           4.00000000 sec
D11          0.030000000 sec
TD0          1

===== CHANNEL f1 =====
NUC1          13C
P1            8.00 usec
PL1          1.00 dB
PL1W         72.42802429 W
SFO1         125.7728799 MHz

===== CHANNEL f2 =====
CPDPRG2      waltz16
NUC2          1H
PCPD2        80.00 usec
PL2          0.00 dB
PL12         16.50 dB
PL13         17.00 dB
PL2W         24.54113007 W
PL12W        0.54940748 W
SFO2         500.1325006 MHz
SI           111072
SF           125.7577943 MHz
WDW          EM
SSB          0
LB           0.30 Hz
GB           0
PC           1.40
  
```

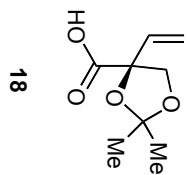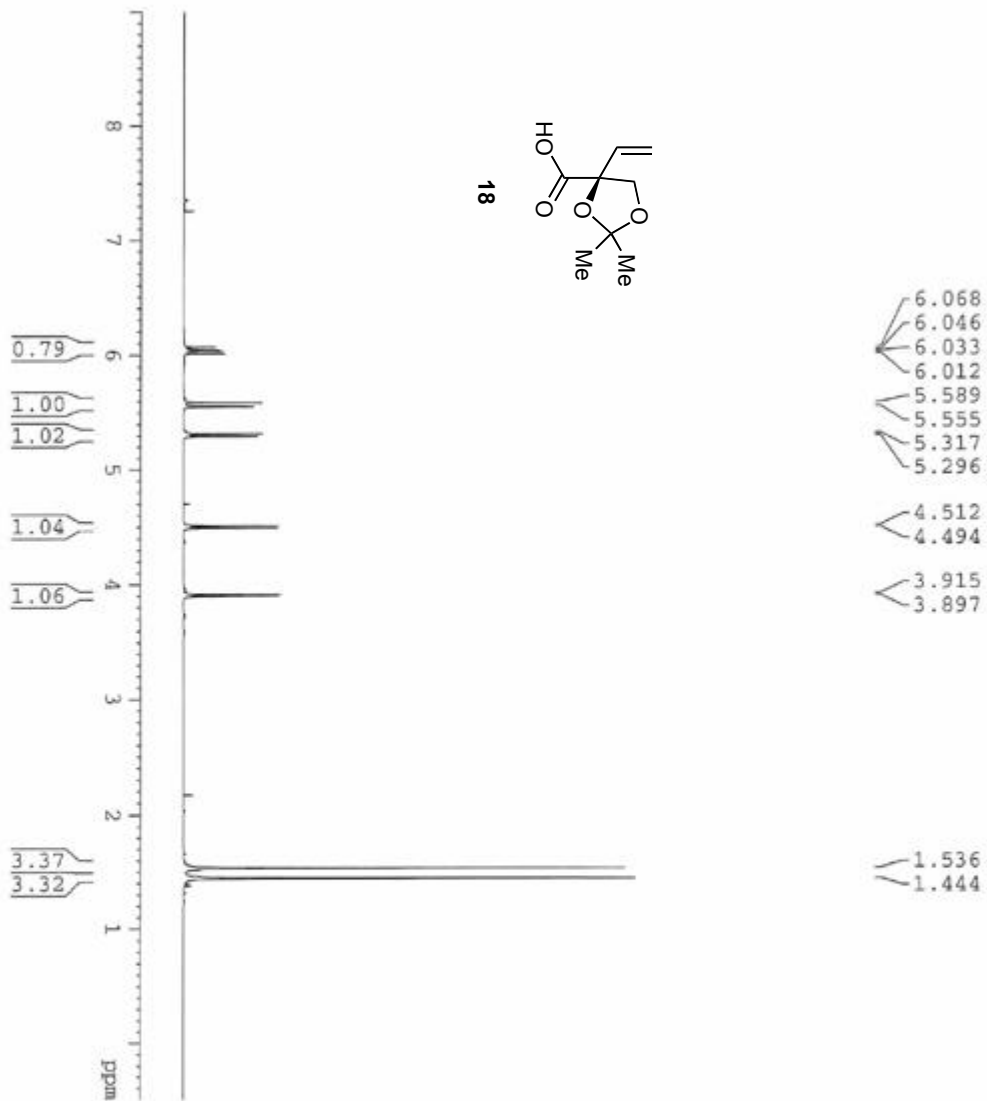

```

NAME          all2108
EXPNO         1
PROCNO       20090520
Date_        10.35
Time         10.35
INSTRUM      spect
PROBHD       5 mm PNUNP 1H/
PULPROG      zgpg30
TD           44898
SOLVENT      CDCl3
NS           8
DS           0
SWH          7500.000 Hz
FIDRES       0.166674 Hz
AQ           2.9999166 sec
RG           71.8
DW           66.667 usec
DE           71.43 usec
TE           295.0 K
D1           3.00000000 sec
D11          1
D10          1

***** CHANNEL f1 *****
NUC1          13C
P1           12.00 usec
PL1          0.00 dB
PL12         24.54113007 W
SFO1         500.1315009 MHz
SI           16384
SF           500.1300090 MHz
WDW          EM
SSB          0
LB           0.30 Hz
GB           0
PC           1.00
  
```

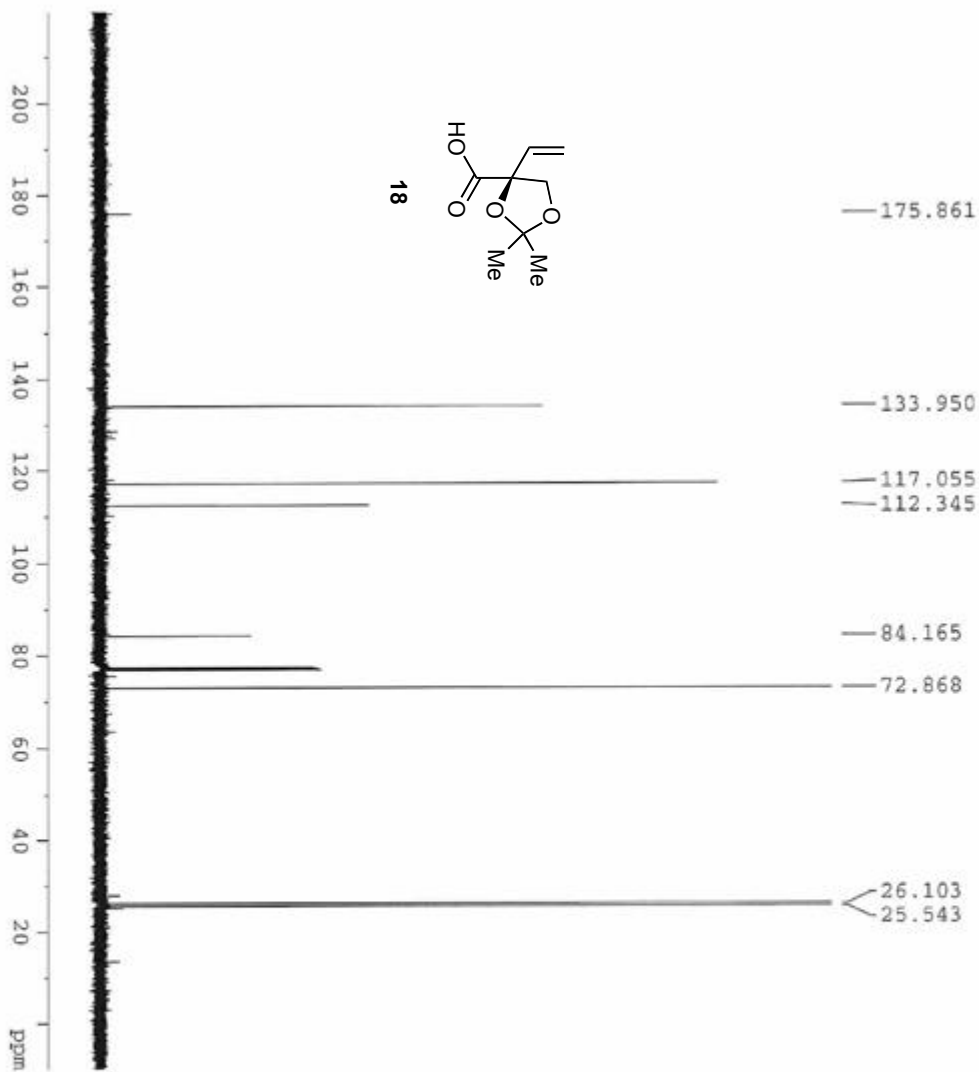

```

NAME          ac12108
EXPNO         2
PROCNO        1
Date_         20090520
Time          11.01
INSTRUM       5 mm PNOUP 1H/
PROBHD        spect
PULPROG       zgpg
TD             65786
SOLVENT       CDCl3
NS            111
DS            4
SWH           32894.738 Hz
FIDRES        0.500026 Hz
AQ            0.9999972 sec
RG            2050
DM            15.200 usec
DE            6.00 usec
TE            295.6 K
D1            4.00000000 sec
D11           0.03000000 sec
TD0           1

***** CHANNEL f1 *****
NUC1          13C
P1            8.00 usec
PL1           1.00 dB
PL1W          72.42802829 W
SFO1          125.7728799 MHz

***** CHANNEL f2 *****
CPDPRG2       waltz16
NUC2          1H
PCPD2         80.00 usec
PL2           0.00 dB
PL12          16.50 dB
PL13          17.00 dB
PL1W          24.54113007 W
PL12W         0.54940748 W
PL13W         0.48965994 W
SFO2          500.1325005 MHz
SI            111072
SP            125.7577914 MHz
KMW           EX
SSB           0
LB            0.30 Hz
GB            0
PC            1.40

```

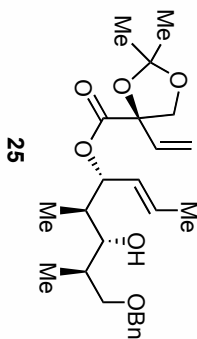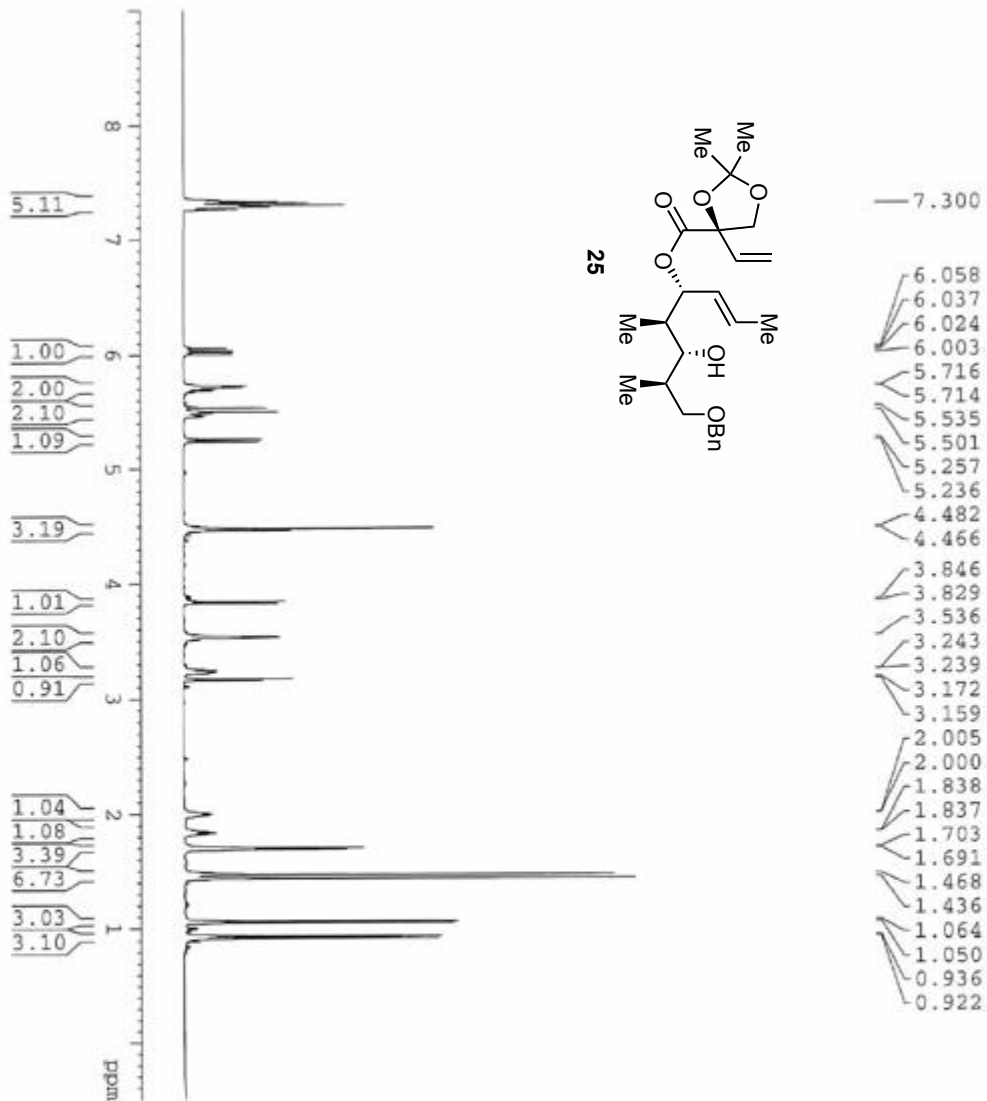

```

NAME          #L12040
EXPNO         1
PROCNO        1
Date_         20090319
Time          14.41
INSTRUM       spect
PROBHD        5 mm PAQNP 1H/
PULPROG       zgpg30
TD            44998
FIDRES        0.166674 Hz
AQ            2.9999166 sec
RG            64
DW            66.667 usec
DE            71.43 usec
TE            295.0 K
D1            3.00000000 sec
TD0           1

===== CHANNEL f1 =====
NUC1          1H
P1            12.00 usec
PL1           0.00 dB
PL12          24.54113007 W
SFO1          500.1332009 MHz
SI            16384
SF            500.1330086 MHz
WDW           EM
SSB           0
LB            0.30 Hz
GB            0
PC            1.00
  
```



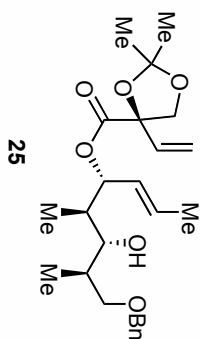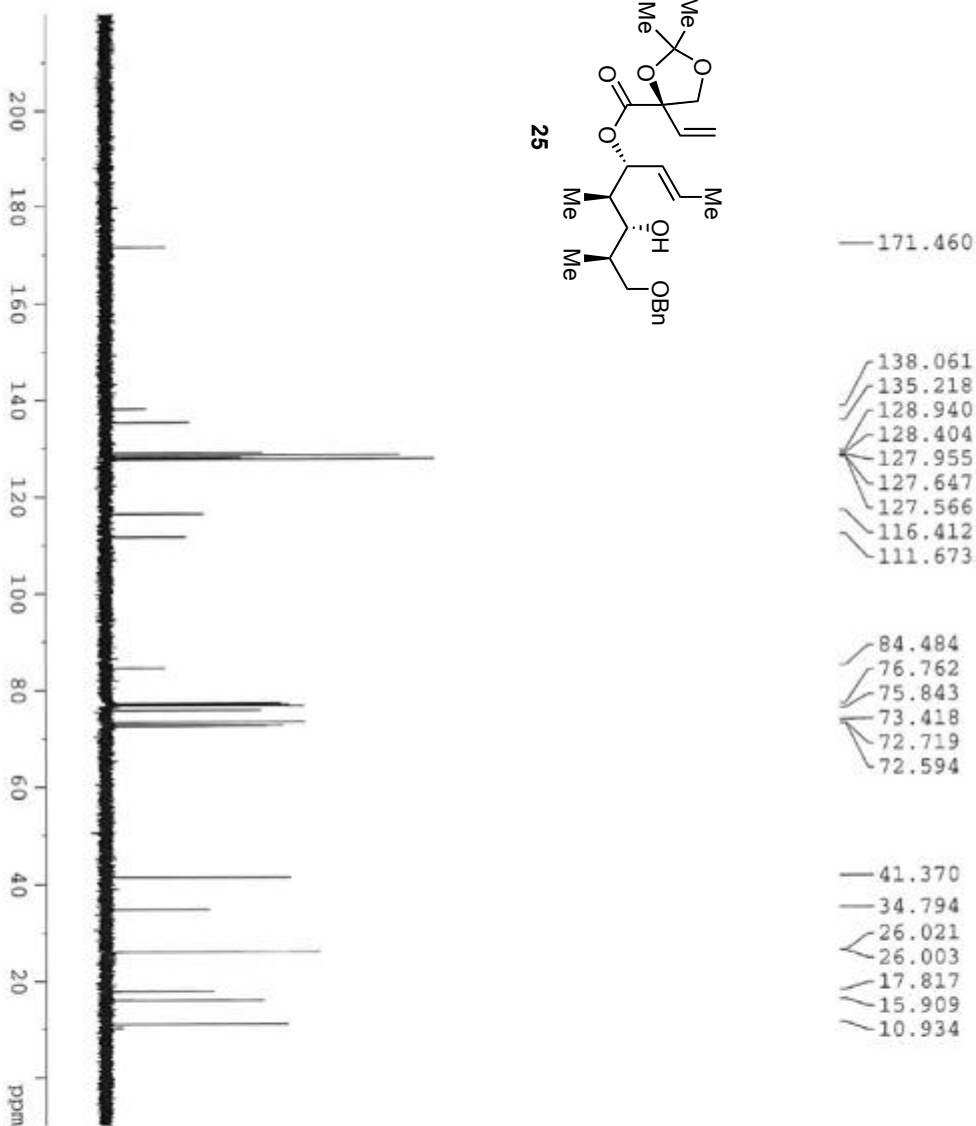

- 171.460
- 138.061
- 135.218
- 128.940
- 128.404
- 127.955
- 127.647
- 127.566
- 116.412
- 111.673
- 84.484
- 76.762
- 75.843
- 73.418
- 72.719
- 72.594
- 41.370
- 34.794
- 26.021
- 26.003
- 17.817
- 15.909
- 10.934

```

NUMR      ac12040
EXPNO      2
PROCNO      1
Date_      20090319
Time       14:49
INSTRUM      spect
PROBHD      5 mm BBOHR 1H/
PULPROG      zgpg
TD          65786
SOLVENT      CDCl3
NS          39
DS          4
SWH         32894.738 Hz
F2IDNMS      0.500026 Hz
AQ          0.9999972 sec
RG          2050
INW         15.200 use
DEC         5.00 use
TE          295.6 K
D1          4.00000000 sec
D11         0.03000000 sec
TD0         1

===== CHANNEL f1 =====
NUC1      13C
P1         8.00 use
PL1         1.00 dB
PL1W       72.42802429 W
SFO1      125.7728399 MHz

===== CHANNEL f2 =====
CEPRPG2      waltz16
NUC2         1H
PCPD2       80.00 use
PL2          0.00 dB
PL12       16.50 dB
PL2W       17.00 dB
PL3W       24.54113007 W
PL4W       0.54940748 W
PL13W      0.48965994 W
SFO2       500.1325006 MHz
SI          131072
SF         125.7577890 MHz
WDW         EM
SSB         0
LB          0.30 Hz
GB          0
PC          1.40

```

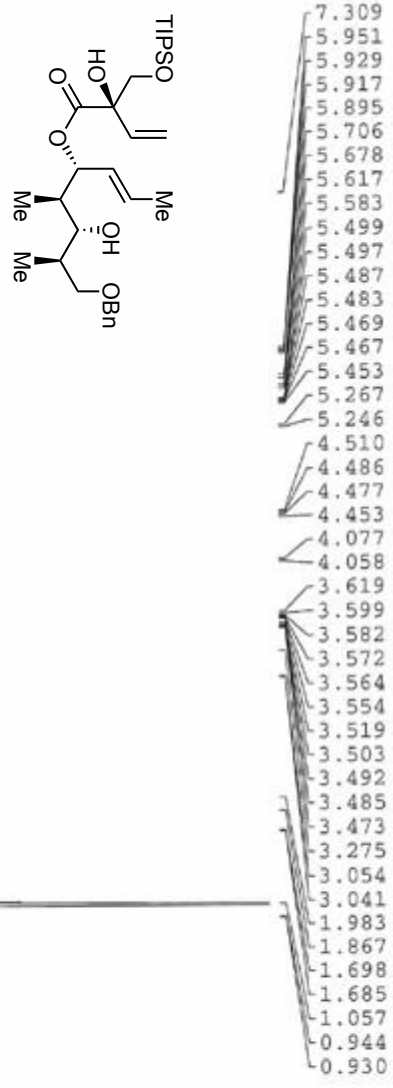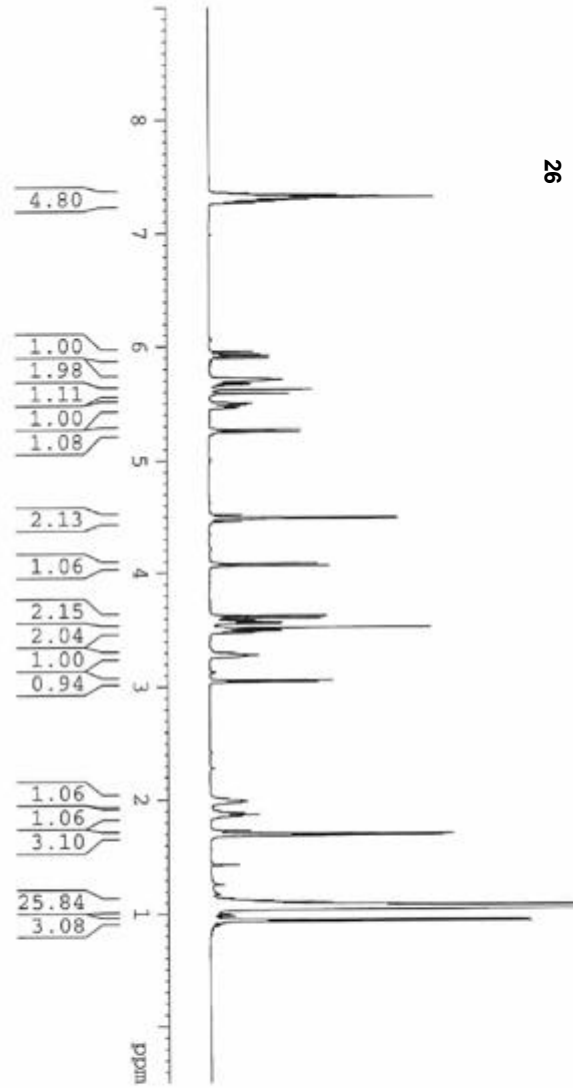

```

NAME          et11298
EXPNO         1
PROCNO        1
Date_         20090205
Time         13.24
INSTRUM       spect
PROBHD        5 mm BBOCP 1H/
PULPROG       zgpg30
TD            65536
SOLVENT       CDCl3
NS            8
DS            0
SWH           7500.000 Hz
F1FINDS       0.16674 Hz
AQ           2.9999166 sec
RG           32
DW           66.667 usec
DE           71.43 usec
TE           295.5 K
D1           3.00000000 sec
TDO          1

***** CHANNEL f1 *****
NUC1          1H
P1           12.00 usec
PL1          0.00 dB
PC1          24.5411007 W
SFO1         500.1335009 MHz
SI           16384
SF           500.1300083 MHz
WDW          EM
SSB          0
LB           0.30 Hz
GB           0
PC           1.00
  
```

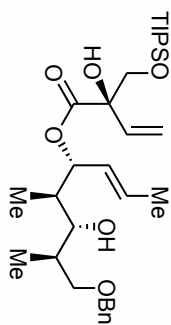

26

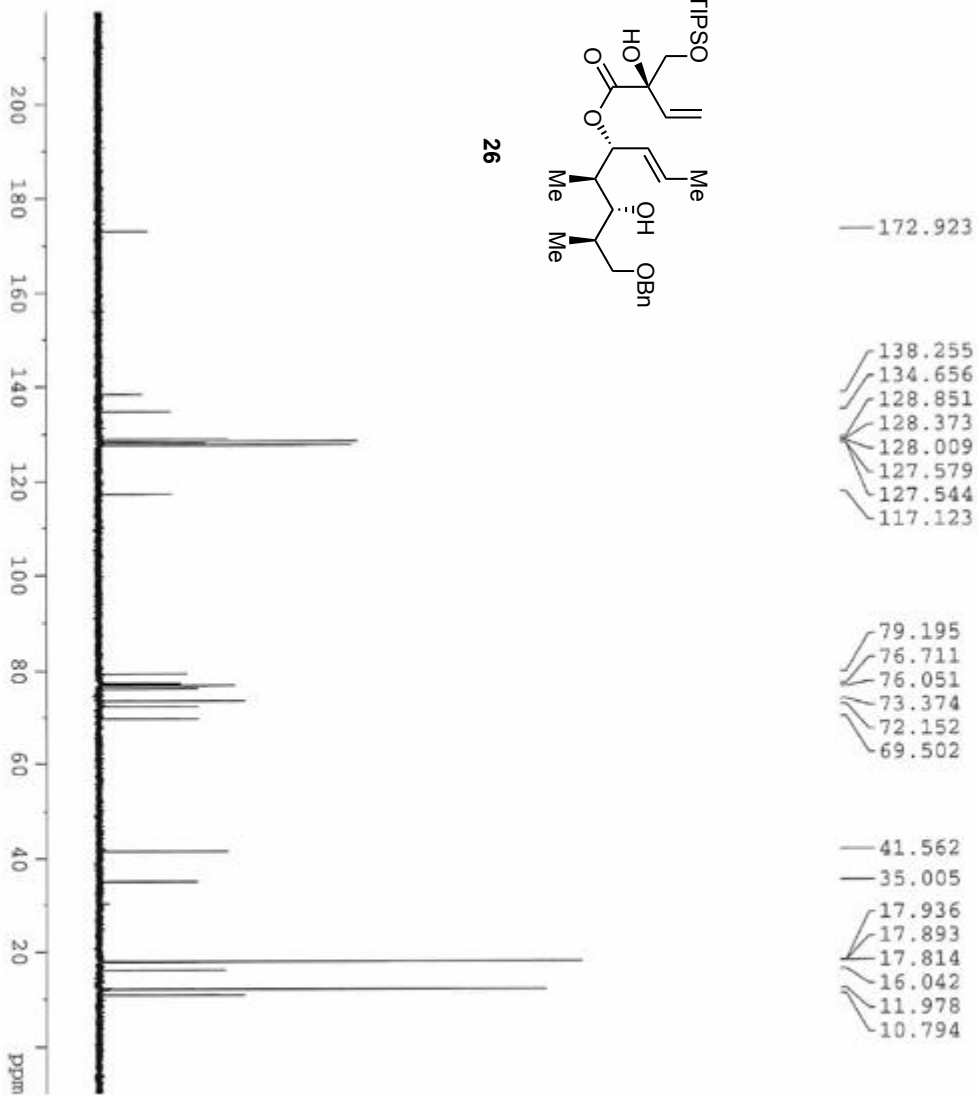

```

NAME          ac11298
EXPNO         2
PROCNO        1
Date_         20090205
Time         13.12
INSTRUM       spect
PROBHD        5 mm PAQNP 1H/
PULPROG       zgpg
TD            65786
SOLVENT       CDCl3
NS           31
DS           4
SWH          32894.738 Hz
FIDRES       0.500026 Hz
AQ          0.9999972 sec
RG          2050
DW          15.200 usec
DE          6.00 usec
TE          296.1 K
D1          4.00000000 sec
D11         0.03000000 sec
TDO         1

===== CHANNEL f1 =====
SFO1        13C
P1          8.00 usec
PL1         1.00 dB
F1LW       72.42802429 W
SFO2        125.7703648 MHz

===== CHANNEL f2 =====
CPDPRG2     waltz16
NUC2        1H
PCPD2       80.00 usec
PL2         0.00 dB
PL12        16.50 dB
PL13        17.00 dB
PL2W        24.54113007 W
PL12W       0.54940748 W
PL13W       0.48965994 W
SFO3        500.1375006 MHz
SI          111072
SF          125.7577890 MHz
MTW         EM
SSB         0
LB          0.30 Hz
GB          0
PC          1.40
  
```

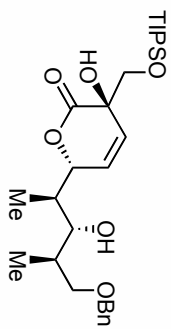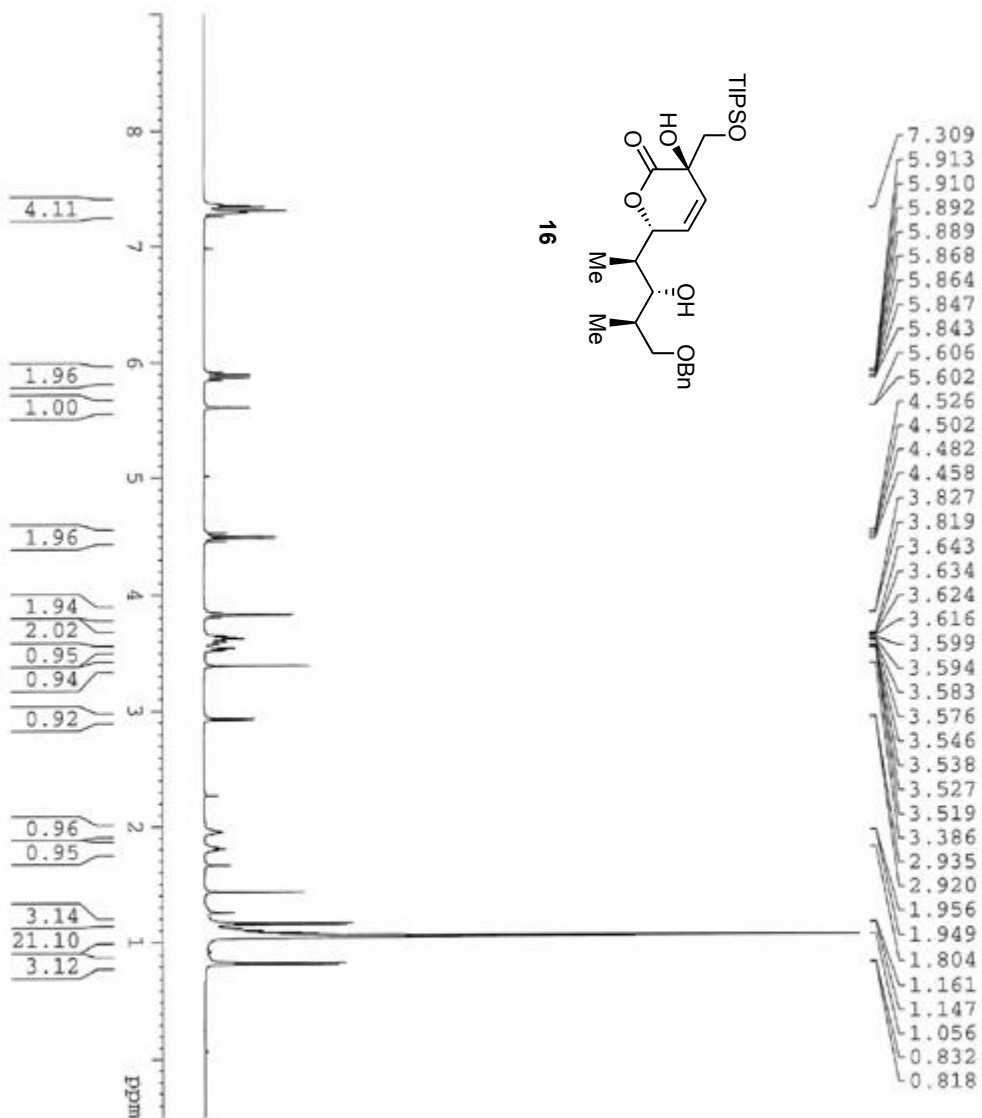

```

NAME          all1299
EXPNO         2
PROCNO        1
Date_         20090205
Time          18.12
INSTRUM       5 mm PNUK1P 1H/
PROBHD        EULPROG
PULPROG       zgpg30
SOLVENT       CDCl3
NS            8
DS            0
SMH           7500.000 Hz
FIDRES        0.166674 Hz
AQ            2.9999166 sec
RG            64
PC            66.667 usec
DE            71.43 usec
TE            295.6 K
D1            3.00000000 sec
TD            1

===== CHANNEL f1 =====
NUC1          1H
P1            12.00 usec
PL1           0.00 dB
PL12         24.54113007 dB
SFO1          500.1315009 MHz
SI            16384
SF            500.130082 MHz
WDW           EM
SSB           0
LB            0.30 Hz
GB            0
PC            1.00
  
```

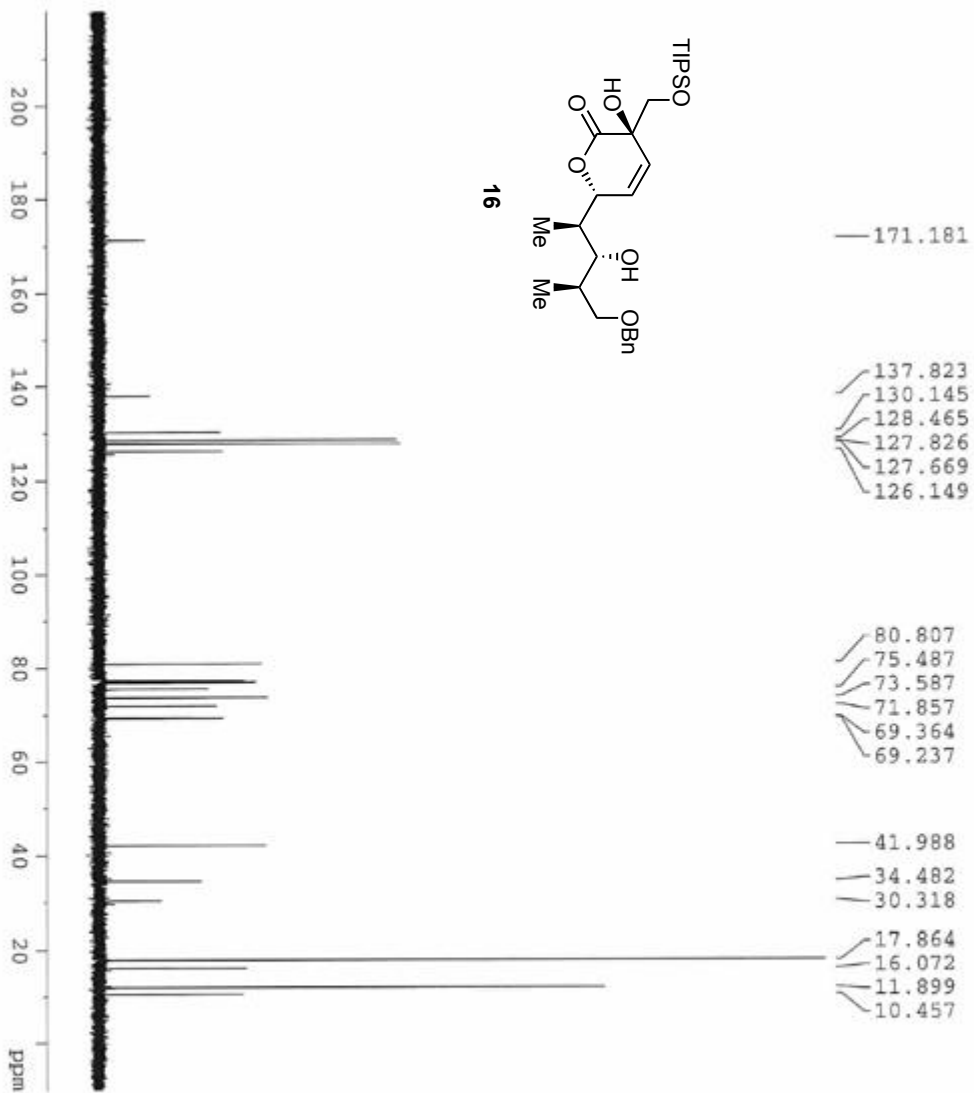

16

```

NAME          u11299
EXPNO         21
PROCNO        1
Date_         20090205
Time         18.23
INSTRUM      spect
PROBHD       5 mm PABNP 1H/
PULPROG      zgpg30
F2          499.9
TD           65786
SOLVENT      CDCl3
NS           71
DS           4
SN1          32894.738 Hz
FIDRES       0.500026 Hz
AQ           0.9999972 sec
RG           2050
DM           15.200 usec
DE           6.00 usec
TE           296.2 K
D1           4.00000000 sec
D11          0.01000000 sec
TD0          1

===== CHANNEL f1 =====
NUC1          13C
P1           8.00 usec
PL1          1.00 dB
PL1W         72.42802429 W
SFO1         125.7728799 MHz

===== CHANNEL f2 =====
CPDPRG2      waltz16
NUC2          1H
PCPD2        80.00 usec
PL2          0.00 dB
PL12         16.50 dB
PL13         17.00 dB
PL2W         24.54113007 W
PL3W         0.54940748 W
PL1W         0.48965994 W
SFO2         500.1325005 MHz
SI           131072
SF           125.7577890 MHz
KRFW         DM
SSB          0
LB           0.30 Hz
GB           0
PC           1.40

```

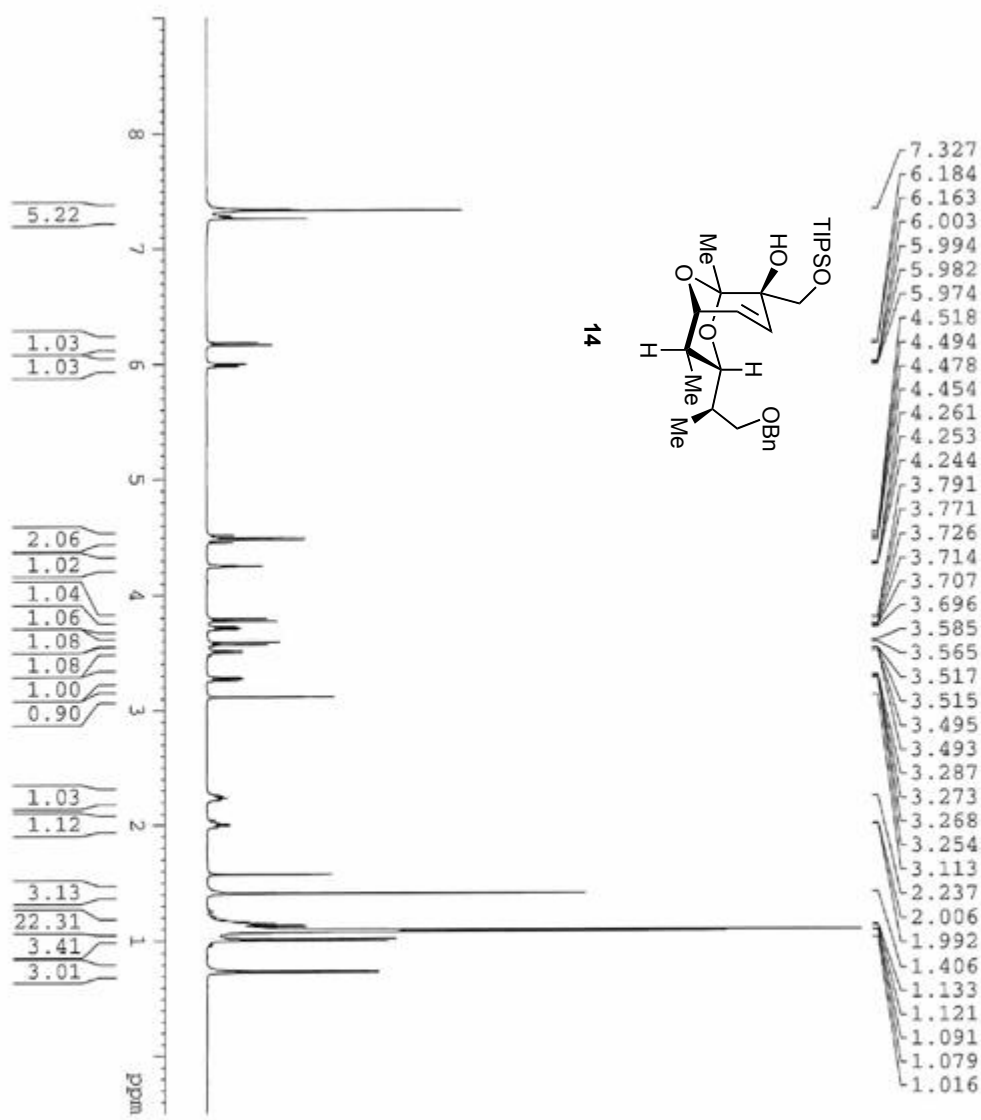

```

NAME          #E11307
EXPNO         1
PROCNO        1
Date_         20090210
Time          12.22
INSTRUM       spect
PROBHD        5 mm PAQNP 1H/
PULPROG       zgpg30
TD            44998
SOLVENT       CDCl3
NS            8
DS            0
SWH           7500.000 Hz
FIDRES       0.16674 Hz
AQ           2.9999166 sec
RG           181
INRG         66.667 use
DR           71.43 use
TE           294.9 K
D1           3.00000000 sec
TD0          1

***** CHANNEL f1 *****
NUC1          1H
P1           12.00 use
PL1          0.00 dB
F1A1         24.54113007 MHz
SFO1         500.133009 MHz
SI           16384
SF           500.130093 MHz
WDW          EM
SSB          0
LB           0.30 Hz
GB           0
PC           1.00

```

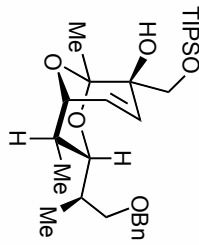

14

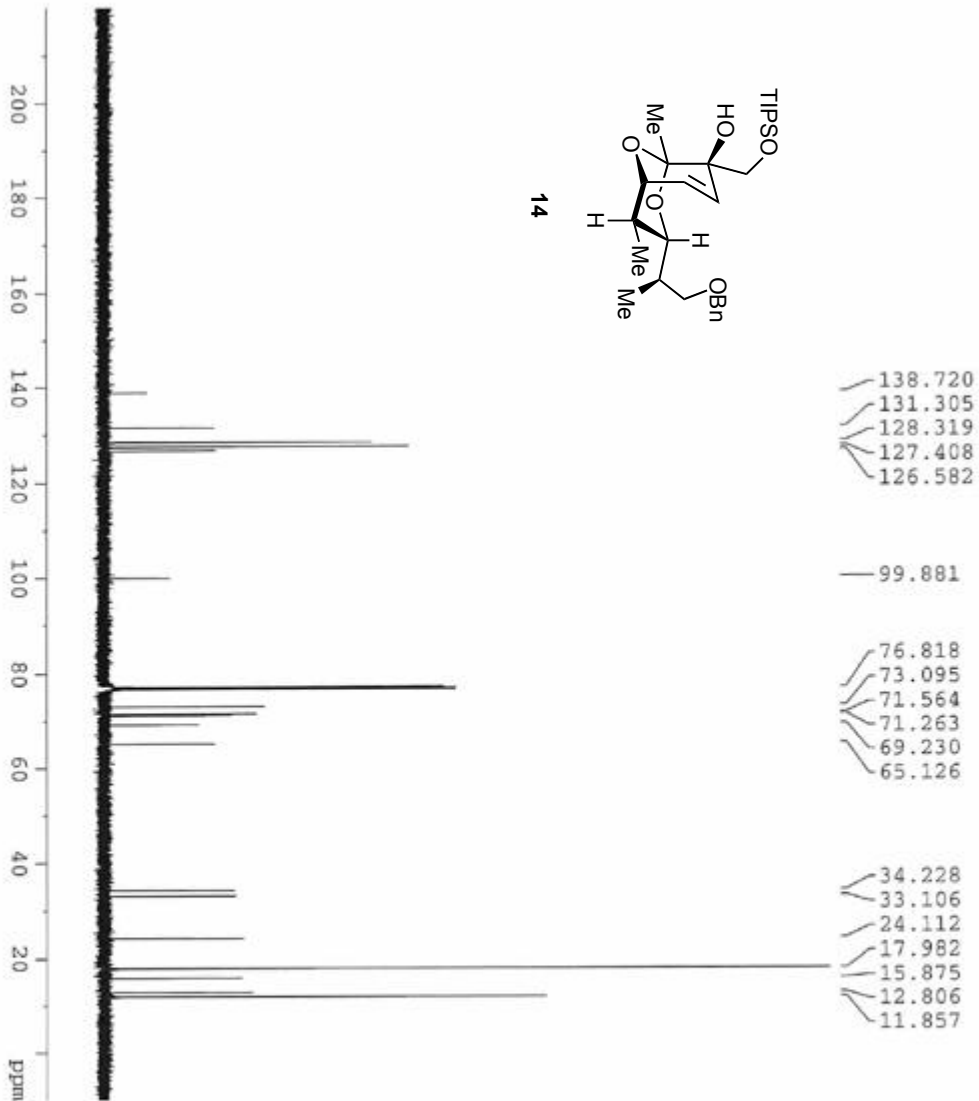

```

NAME          #11107
EXPNO         2
PROCNO        1
Date_         20090210
Time          13.26
INSTRUM       spect
PROBHD        5 mm PAQNP 1H/
PULPROG       zgpg
TD             65786
SOLVENT       CDCl3
NS            279
DS            4
SMH           32894.738 Hz
FIDRES        0.500026 Hz
AQ            0.999972 sec
RG            2050
PC            15.200 usec
DE            6.00 usec
TE            295.4 K
D1            4.00000000 sec
D11           0.03000000 sec
TD0           1

***** CHANNEL #1 *****
NUC1          13C
P1            8.00 usec
PL1           1.00 dB
PL1W          72.42802429 W
SFO1          125.7728799 MHz

***** CHANNEL #2 *****
CPDPRG2       waltz16
NUC2          1H
PCPD2         80.00 usec
PL2           0.00 dB
PL12          16.50 dB
PL13          17.00 dB
PL2W          24.54113007 W
PL3W          0.54940748 W
SPO2          500.1325006 MHz
SI            131072
SP            125.7577890 MHz
MFW           2M
SSB           0
LH            0.30 Hz
GB            0
PC            1.40
  
```

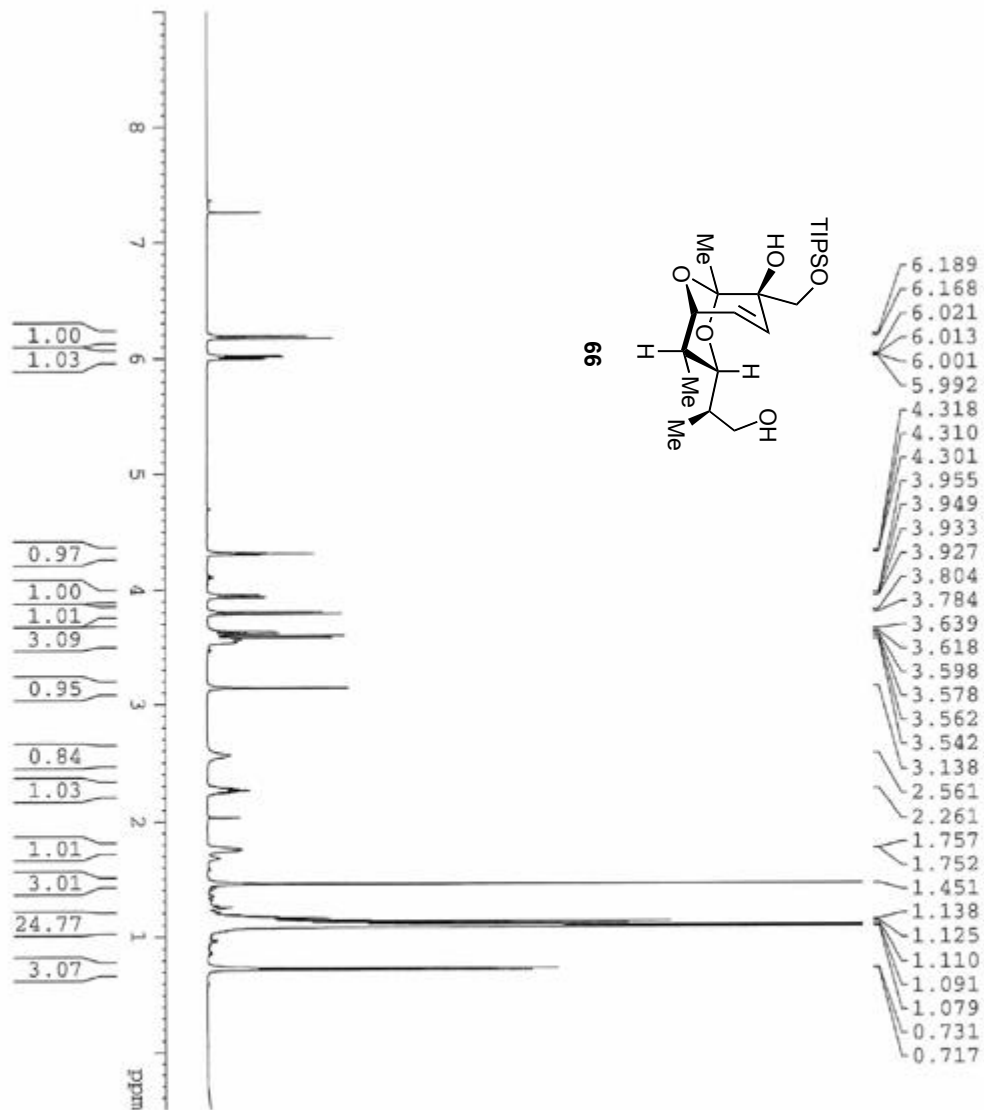

```

NAME          #L12003
EXPNO         1
PROCNO       20090213
Date_       14.11
Time        14:11
INSTRUM     spect
PROBHD      5 mm PACTP 1H/
PULPROG     zgpg30
TD          449916
SOLVENT     CDCl3
NS          8
DS          0
SNH         7500.000 Hz
FIDRES      0.166674 Hz
AQ          2.9999166 sec
RG          57
DM          66.667 us
DE          71.43 us
TE          294.5 K
D1          3.00000000 sec
TDO         1

===== CHANNEL f1 =====
NUC1         1H
P1          12.00 us
PL1         0.00 dB
FL1         24.54112007 V
SFO1        300.135009 MHz
SI          16384
SF          500.130092 MHz
WDW         EM
SSB         0
LB          0.10 Hz
GB          0
PC          1.00

```



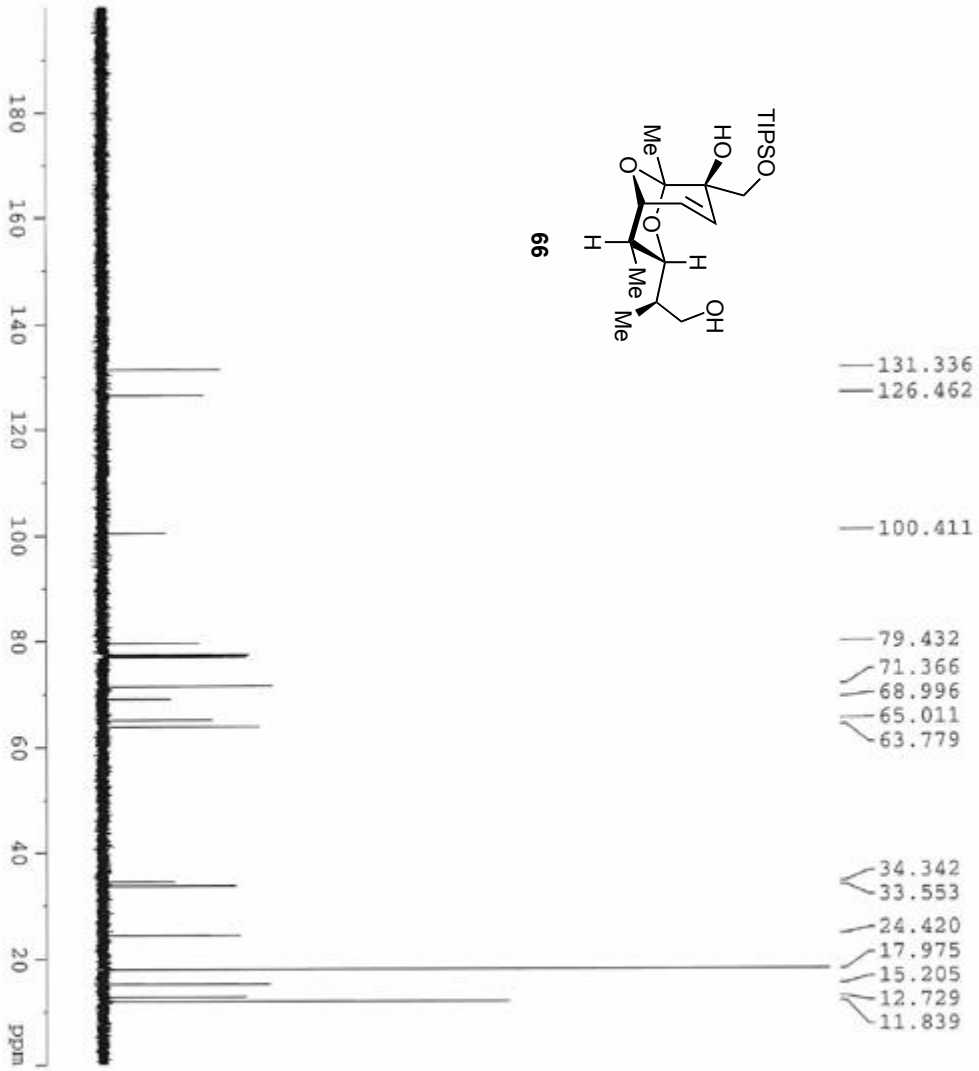

```

NAME          #L12003
EXPNO        2
PROCNO       1
Date_         20090213
Time         14.18
INSTRUM      spect
PROBHD       5 mm PAQNP 1H/
PULPROG      zgpg2
TD           65532
SOLVENT      CDCl3
NS           39
DS           4
SWH          25252.525 Hz
FIDRES      0.500010 Hz
AQ          0.9999896 sec
RG          2050
INW         19.800 usec
DE          6.00 usec
TR          295.1 K
D1          4.00000000 sec
D11         0.01000000 sec
TD0         1

===== CHANNEL f1 =====
NUC1         13C
P1          8.00 usec
PL1         1.00 dB
FLLW       72.42802429 W
SFO1       125.7703848 MHz

===== CHANNEL f2 =====
CPDPRG2     waltz16
NUC2         1H
PCPD2       80.00 usec
PL2         0.00 dB
PL12       16.50 dB
PL13       17.00 dB
PL2W       24.54111007 W
PL3W       0.54940748 W
PL1W       0.48965894 W
SFO2       500.1325006 MHz
SI         131072
SF         125.7577890 MHz
WPROG       em
SOLB        D
LAMBDA      0.30 MHz
GB          0
IC          1.40

```

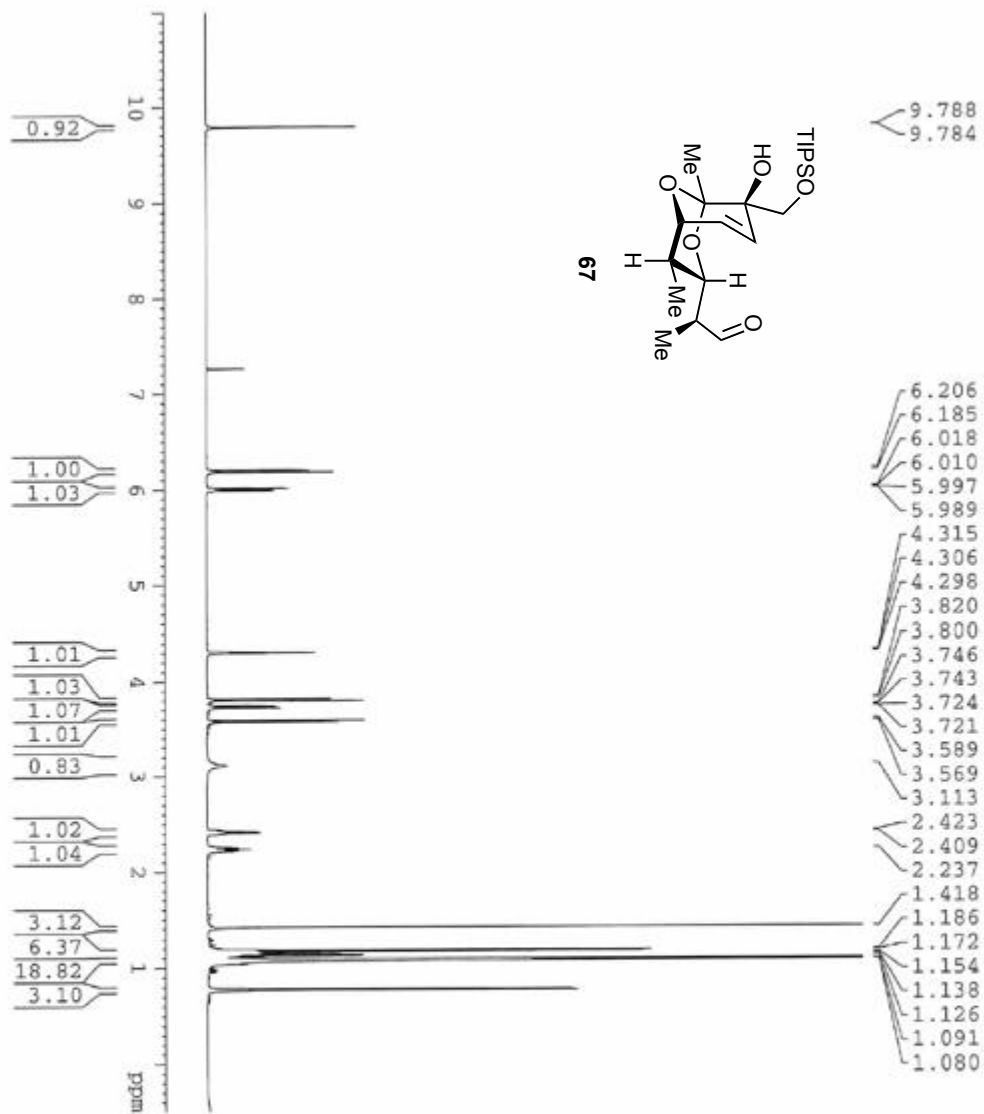

```

NAME          ac12081
EXPNO         1
PROCNO       1
Date_        20090504
Time         12.41
INSTRUM      spect
PROBHD       5 mm PABNP 1H/
PULPROG      zg
TD           44998
SOLVENT      CDCl3
NS           8
DS           0
SFO1         7500.000 Hz
F2RES        0.166674 Hz
AQ           2.999166 sec
RG           400.3
SWH           66.667 um
WDW           71.43 um
SSB           295.2 K
GB           0
PC           3.00000000 sec
TD0          1

===== CHANNEL f1 =====
NUC1          1H
P1           12.00 um
PL1          0.00 dB
PL1W         24.54113007 W
SFO1         500.1325009 MHz
SI           16384
SF           500.1300073 MHz
WDW          EM
SSB          0
GB           0
PC           0.30 Hz
PC           1.00
  
```

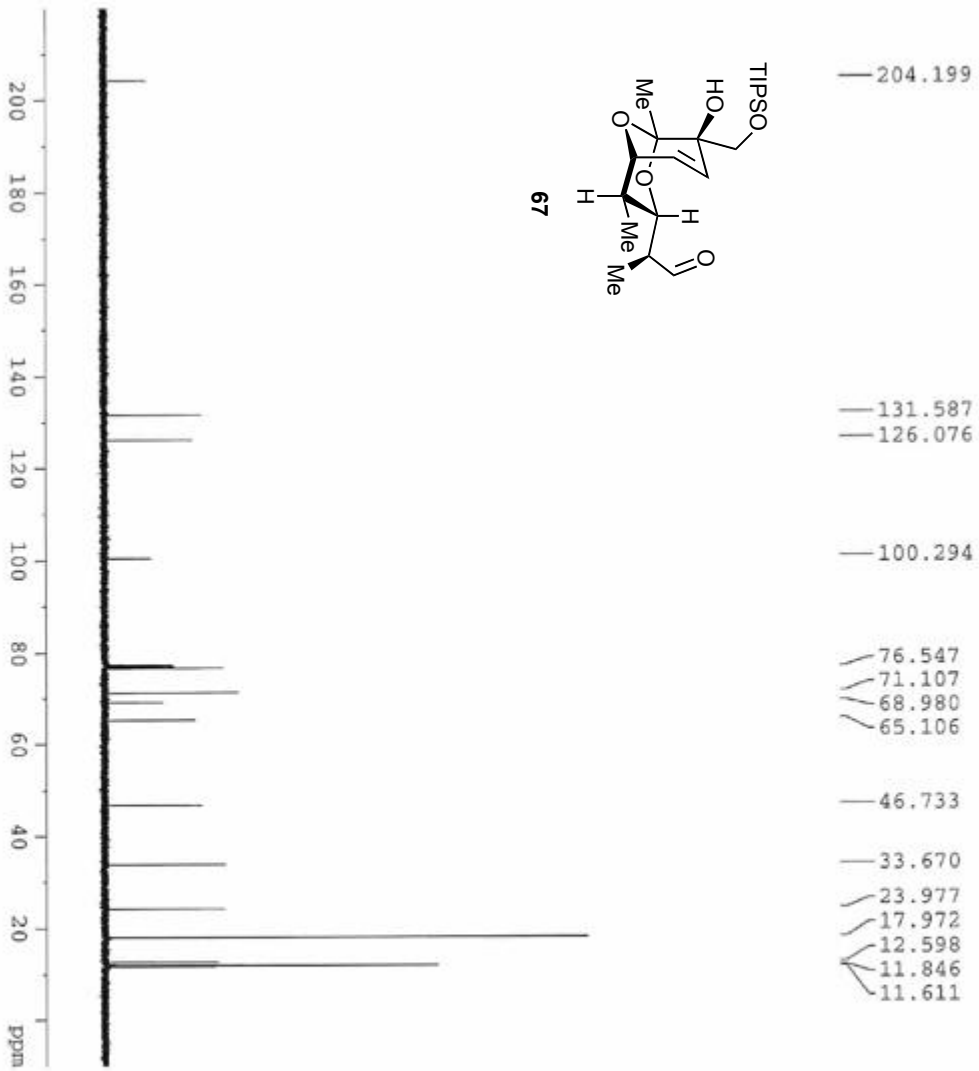

```

NAME          #12081
EXPNO         2
PROCNO        1
PROCCH        20090504
DATE_         12.47
Time          12.47
INSTRUM       spect
PROBRD        5 mm PAQNP 1H/
PULPROG       zgpg
TD            65766
SOLVENT      CDCl3
NS            23
DS            4
SWH           32884.738 Hz
FIDRES       0.500026 Hz
AQ           0.999972 sec
RG           2050
KW           15.200 us
DE           6.00 us
TE           295.7 K
D1           4.00000000 sec
D11          0.03000000 sec
TD0          1

===== CHANNEL f1 =====
NUC1          13C
P1            8.00 us
PL1          1.00 dB
PC1W         72.42802428 W
SFO1         125.7728799 MHz

===== CHANNEL f2 =====
NAME         waltz16
NUC2         1H
PC2W         80.00 us
PL2          0.00 dB
PL12         16.50 dB
PL13         17.00 dB
PL2W         24.54113007 W
PL12W        0.54940748 W
PL13W        0.48965994 W
SFO2         500.1325006 MHz
SI           131072
SF           125.7577890 MHz
WDW          EM
SSB          0
GB           0
PC           1.40
  
```

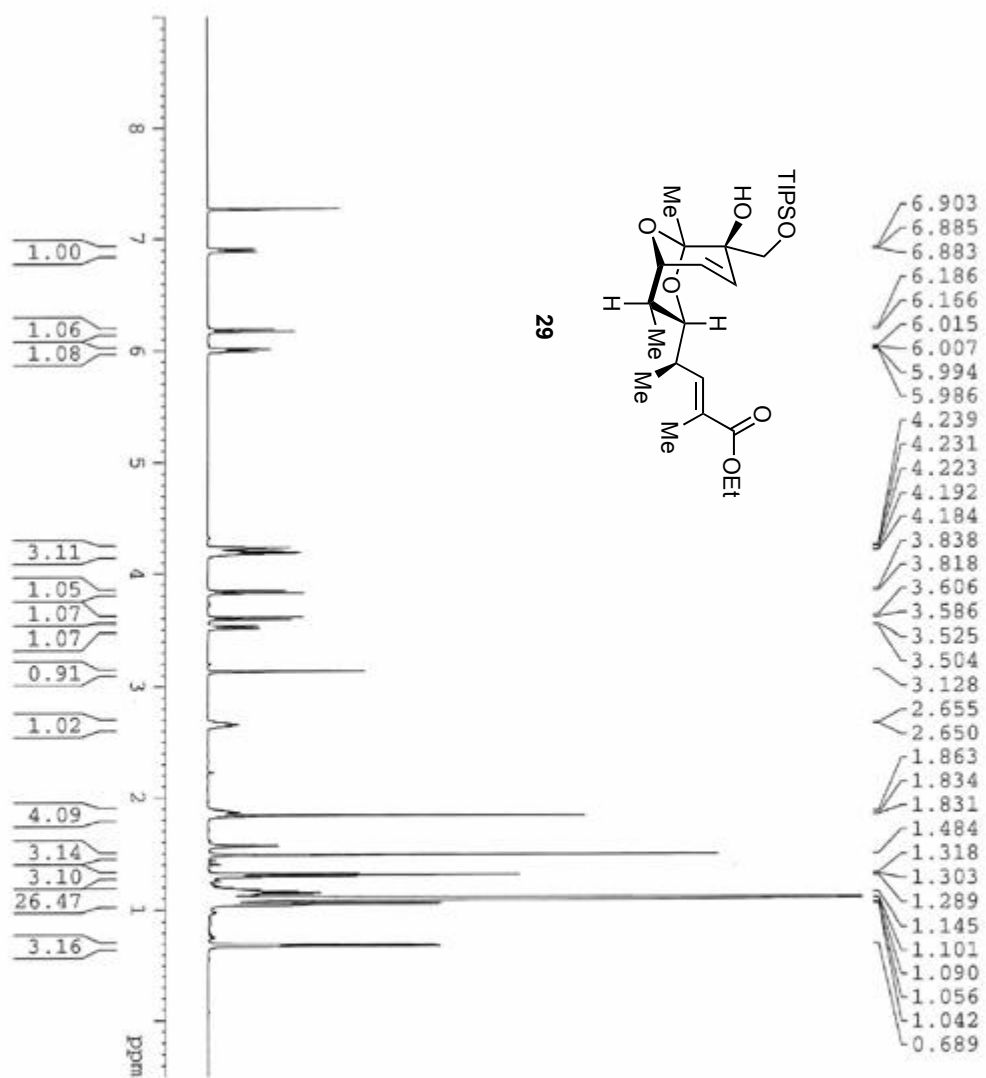

```

NAME          #112006
EXPNO         3
PROCNO        1
Date_         20090218
Time          17.36
INSTRUM       spect
PROBHD        5 mm PAQNP 1H/
PULPROG       zgpg30
TD            44928
SOLVENT       CDCl3
NS            8
DS            0
SWH           7500.000 Hz
FIDRES        0.166674 Hz
AQ            2.9999180 sec
RG            287
WDW            66.667 us
DE            71.43 us
TE            295.2 K
D1            3.00000000 sec
T100          1

----- CHANNEL f1 -----
NUC1          1H
P1            12.00 usec
PL1           0.00 dB
PULP1        24.5411007 usec
SFO1         500.1350009 MHz
SI           16384
SF           500.1300086 MHz
WDW          EM
SSB           0
LFR           0.30 MHz
GB           0
PC            1.00

```

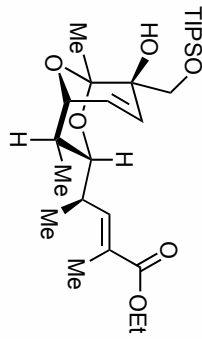

29

- 168.139
- 141.955
- 131.279
- 127.708
- 126.644
- 100.031
- 76.936
- 71.213
- 69.184
- 65.170
- 60.505
- 34.208
- 34.059
- 24.009
- 17.982
- 16.644
- 14.254
- 12.681
- 12.509
- 11.874

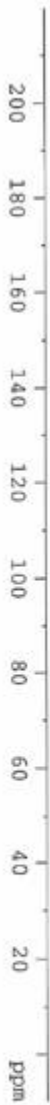

```

NAME          at12006
EXPNO         31
PROCNO        1
Date_         20090219
Time         14.18
INSTRUM       spect
PROBHD        5 mm QNP 1H/
PULPROG       zgpg
TD            65766
SOLVENT       CDCl3
NS           327
DS            4
SFO1         32894.738 Hz
P1RES        0.500026 Hz
AQ           0.999972 sec
RG           2050
SWH           15.200 use
F2          6.00 use
PC           298.0 K
D11          4.00000000 sec
D1           0.03000000 sec
TD0          1

===== CHANNEL f1 =====
NUC1          13C
P1            8.00 use
PL1           1.00 dB
PL1W         72.42802429 W
SFO1         125.7728799 MHz

===== CHANNEL f2 =====
CPDPRG2      waltz16
NUC2          1H
PCYPR2       90.00 use
RGYPR2       0.00 dB
PL2          18.50 dB
PL2W         1.00 dB
PL12W        24.54113007 W
PL12W        0.54940748 W
PL13W        0.48965994 W
SFO2         500.1325006 MHz
SI           131072
SF           125.7577892 MHz
WDM          EM
SSB          0
SSB          0.30 Hz
LB           0
GB           0
PC           1.40
  
```

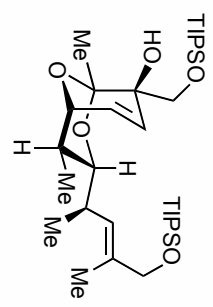

30

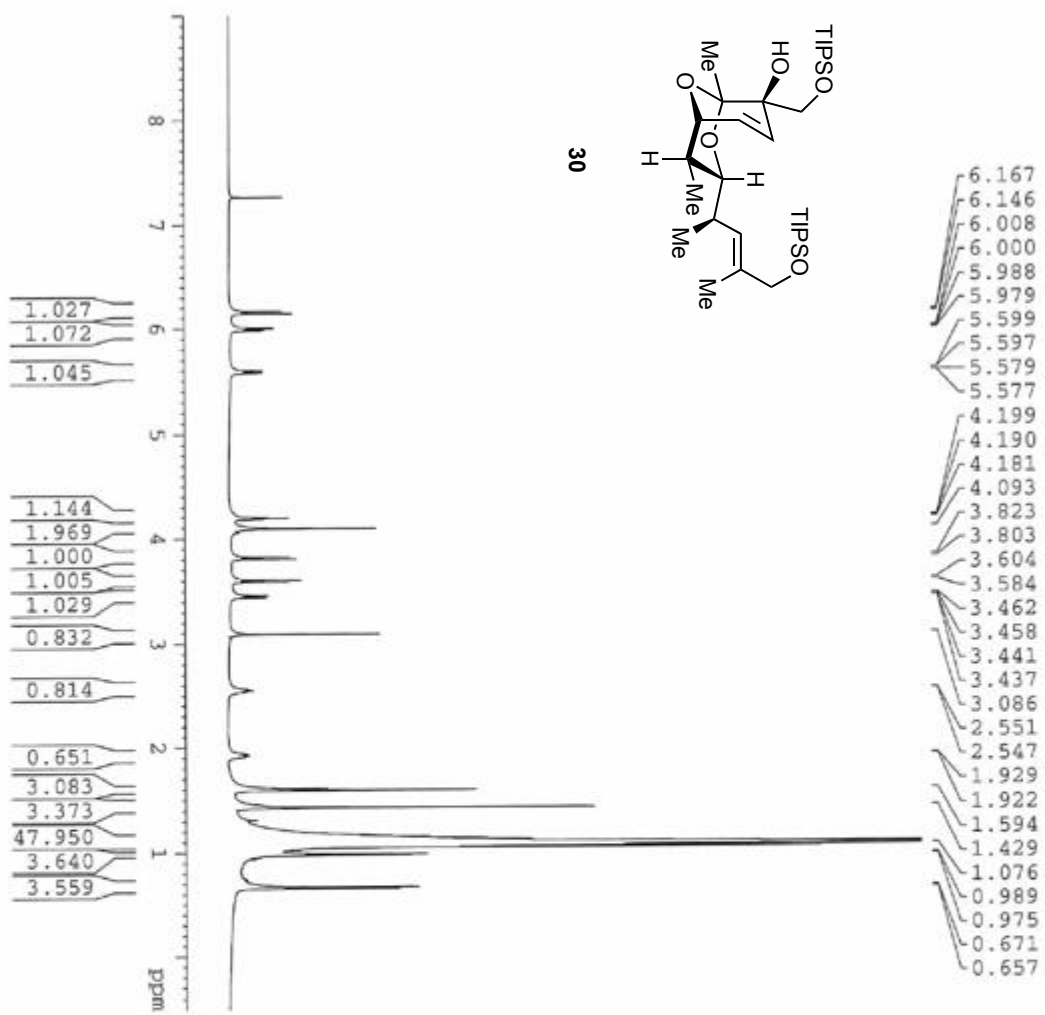

1.027  
1.072  
1.045  
1.144  
1.969  
1.000  
1.005  
1.029  
0.832  
0.814  
0.651  
3.083  
3.373  
47.950  
3.640  
3.559

6.167  
6.146  
6.008  
6.000  
5.988  
5.979  
5.599  
5.597  
5.579  
5.577  
4.199  
4.190  
4.181  
4.093  
3.823  
3.803  
3.604  
3.584  
3.462  
3.458  
3.441  
3.437  
3.086  
2.551  
2.547  
1.929  
1.922  
1.594  
1.429  
1.076  
0.989  
0.975  
0.671  
0.657

```

NAME          RL11041
EXPNO         5
PROCNO        1
Date_         20100603
Time         17.55
INSTRUM       spect
PROBHD        5 mm QNP 1H
PULPROG       zgpg30
TD            45044
SOLVENT       CHCl3
NS            8
DS            0
SWH           7507.507 Hz
FIDRES        0.166671 Hz
AQ           2.999804 sec
RG            32
DE           66.600 usec
TE           300.2 K
D1           3.0000000 sec
***** CHANNEL f1 *****
NUC1          13C
P1           9.00 usec
PL1          0.00 dB
SFO1         500.135009 MHz
SI           65536
SF           500.1300129 MHz
WDW          EM
SSB           0
LB           0.30 Hz
GB           0
PC           1.00
  
```

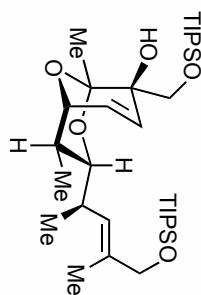

30

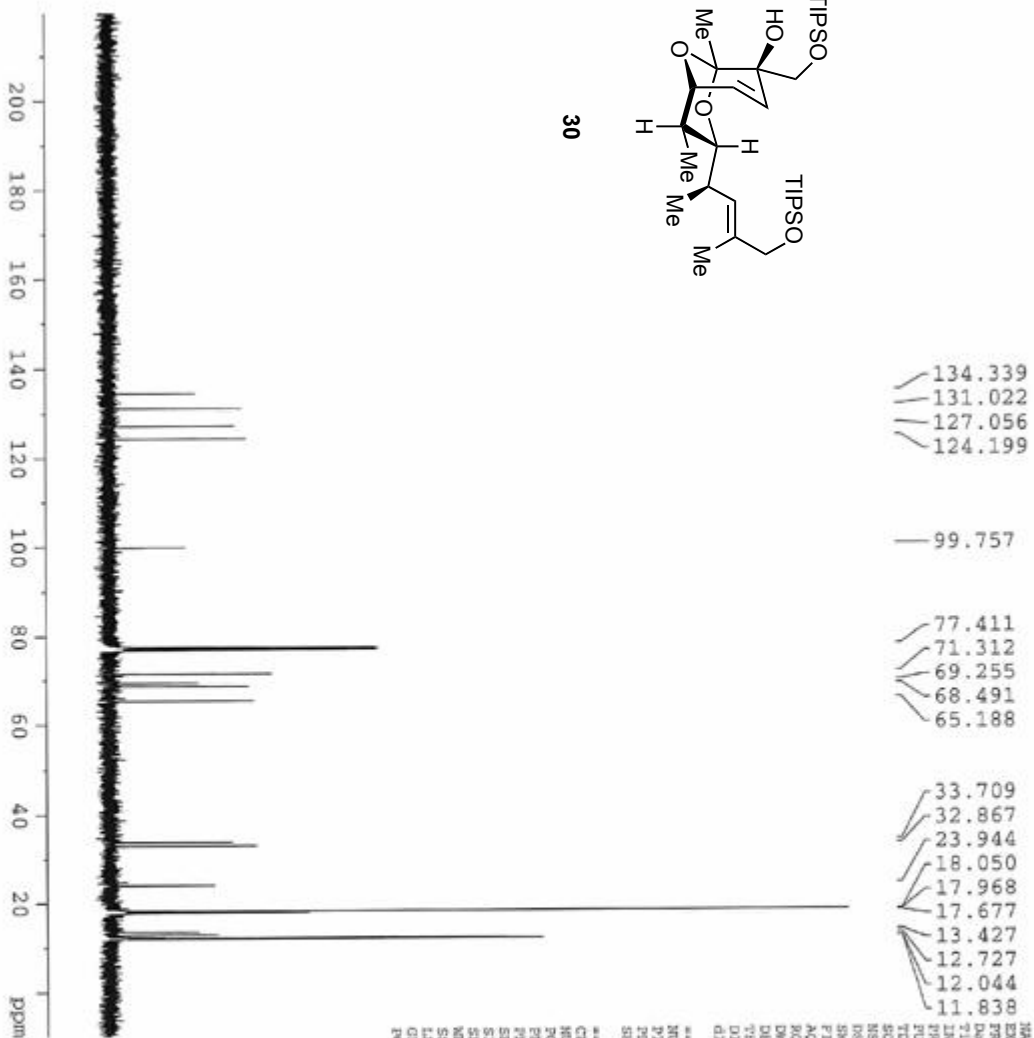

134.339  
131.022  
127.056  
124.199

99.757

77.411  
71.312  
69.255  
68.491  
65.188

33.709  
32.867  
23.944  
18.050  
17.968  
17.677  
13.427  
12.727  
12.044  
11.838

```

NAME          4:13041
EXPNO         51
PROCNO        1
Date_         20100603
Time          17.46
INSTRUM       spect
PROBHD        5 mm QNP 1H
PULPROG       zgpg
TD             60602
SOLVENT       CDCl3
NS            104
DS            4
SNH           10101.031 Hz
FIDRES        0.500813 Hz
AQ            0.9998830 sec
RG            4.6284
WDW           16.500 usec
DE           1.500 usec
TE            300.0 K
DETE          3.00000000 sec
D1            0.03000000 sec
d11           0.03000000 sec

----- CHANNEL f1 -----
NUC1          13C
P1            8.00 usec
PL1           1.00 dB
SFO1         125.7715724 MHz

----- CHANNEL f2 -----
CPDPRG2      waltz16
NUC2          1H
PCPD2        90.00 usec
PL2          120.00 dB
PL12         20.00 dB
SFO2         500.1318000 MHz
SI           32768
SF           125.7577932 MHz
WDW          RM
SSB          0
LB           1.00 Hz
GB           0
PC           1.40
  
```

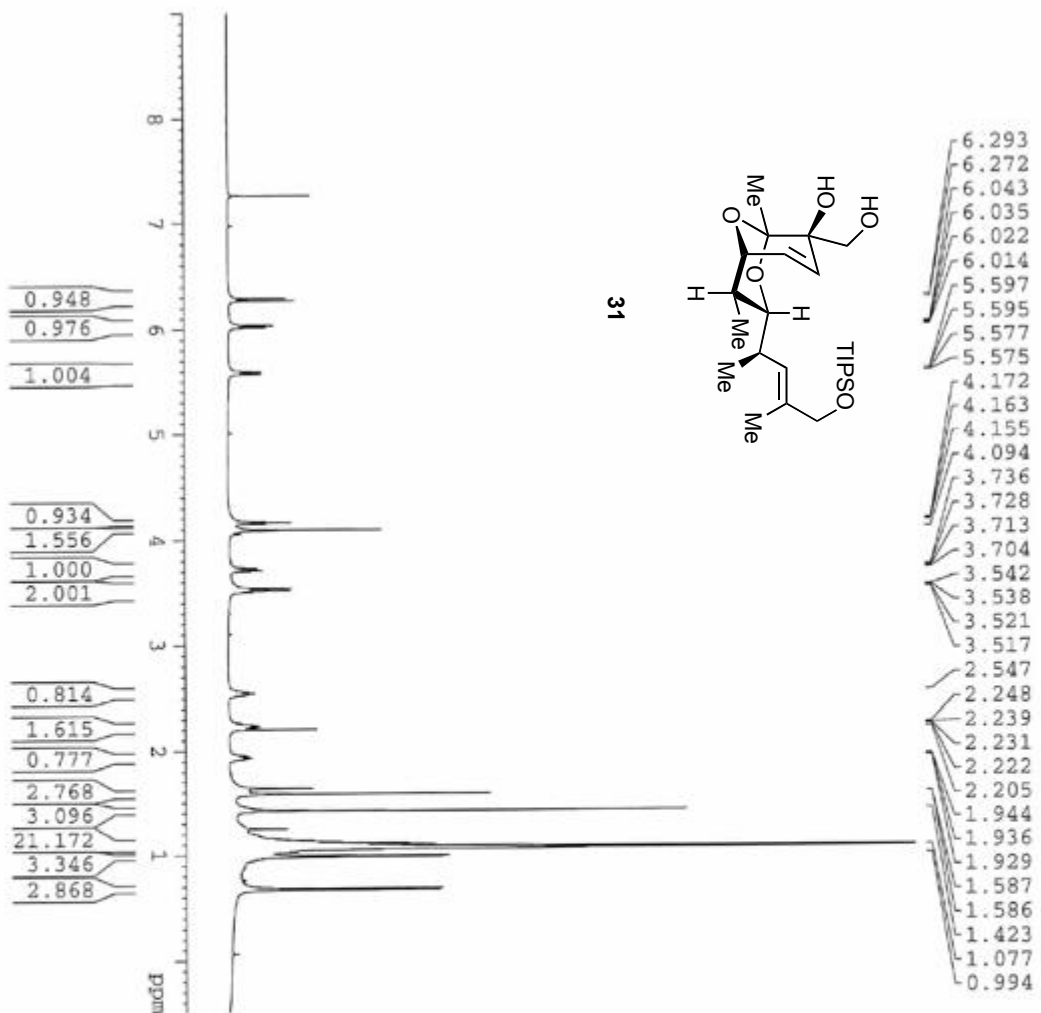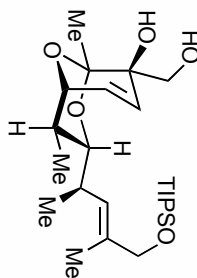

```

NAME          SL13192
EXPNO         1
PROCNO        1
Date_         20100614
Time          11.15
INSTRUM       spect
PROBHD        5 mm QNP 1H
PULPROG       zgpg30
TD            45044
SOLVENT       CDCl3
NS            8
DS            0
SSM           7507.537 Hz
FT2DRHS       0.166871 Hz
AQ            2.7999804 sec
RG            64
RG2           64
RG3           64
RG4           64
RG5           64
RG6           64
RG7           64
RG8           64
RG9           64
RG10          64
RG11          64
RG12          64
RG13          64
RG14          64
RG15          64
RG16          64
RG17          64
RG18          64
RG19          64
RG20          64
RG21          64
RG22          64
RG23          64
RG24          64
RG25          64
RG26          64
RG27          64
RG28          64
RG29          64
RG30          64
RG31          64
RG32          64
RG33          64
RG34          64
RG35          64
RG36          64
RG37          64
RG38          64
RG39          64
RG40          64
RG41          64
RG42          64
RG43          64
RG44          64
RG45          64
RG46          64
RG47          64
RG48          64
RG49          64
RG50          64
RG51          64
RG52          64
RG53          64
RG54          64
RG55          64
RG56          64
RG57          64
RG58          64
RG59          64
RG60          64
RG61          64
RG62          64
RG63          64
RG64          64
RG65          64
RG66          64
RG67          64
RG68          64
RG69          64
RG70          64
RG71          64
RG72          64
RG73          64
RG74          64
RG75          64
RG76          64
RG77          64
RG78          64
RG79          64
RG80          64
RG81          64
RG82          64
RG83          64
RG84          64
RG85          64
RG86          64
RG87          64
RG88          64
RG89          64
RG90          64
RG91          64
RG92          64
RG93          64
RG94          64
RG95          64
RG96          64
RG97          64
RG98          64
RG99          64
RG100         64
PC            1.00
===== CHANNEL f1 =====
NUC1          1H
P1            9.00 usec
PL1           0.00 dB
SFO1         500.135009 MHz
SI           65536
SF           500.1350133 MHz
WDW          EM
SSB          0
LB           0.30 Hz
GB           0
PC            1.00
  
```



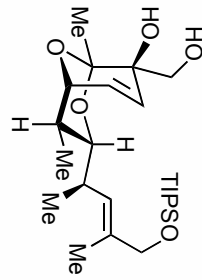

31

- 134.468
- 130.795
- 128.230
- 123.786
- 100.316
- 77.599
- 71.576
- 69.583
- 68.346
- 64.437
- 33.830
- 32.809
- 23.888
- 18.053
- 17.552
- 13.454
- 12.734
- 12.043

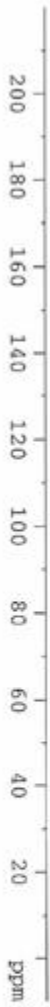

```

NAME: #C13192
EXPNO: 1
PROCNO: 1
DATE_: 20100614
TIME: 11.18
INSTRUM: spect
PROBHD: 5 mm QNP 1H
PULPROG: zgpg
TD: 65536
SOLVENT: CDCl3
NS: 200
DS: 4
SWH: 10303.011 Hz
F2DRS: 0.500013 Hz
AQ: 0.9999810 sec
RG: 16384
DW: 16.590 usec
DE: 7.50 usec
TE: 300.0 K
D1: 3.06000000 sec
d11: 0.03000000 sec

----- CHANNEL f1 -----
NUC1: 13C
P1: 8.00 usec
PL1: 3.00 dB
SFO1: 125.7715724 MHz

----- CHANNEL f2 -----
CPDPRG2: MALTSP6
NUC2: 1H
P2: 90.00 usec
PL2: 120.00 dB
SFO2: 500.1318000 MHz
SI: 32768
WDW: EM
SSB: 0
LB: 1.00 Hz
GB: 0
PC: 1.40
  
```

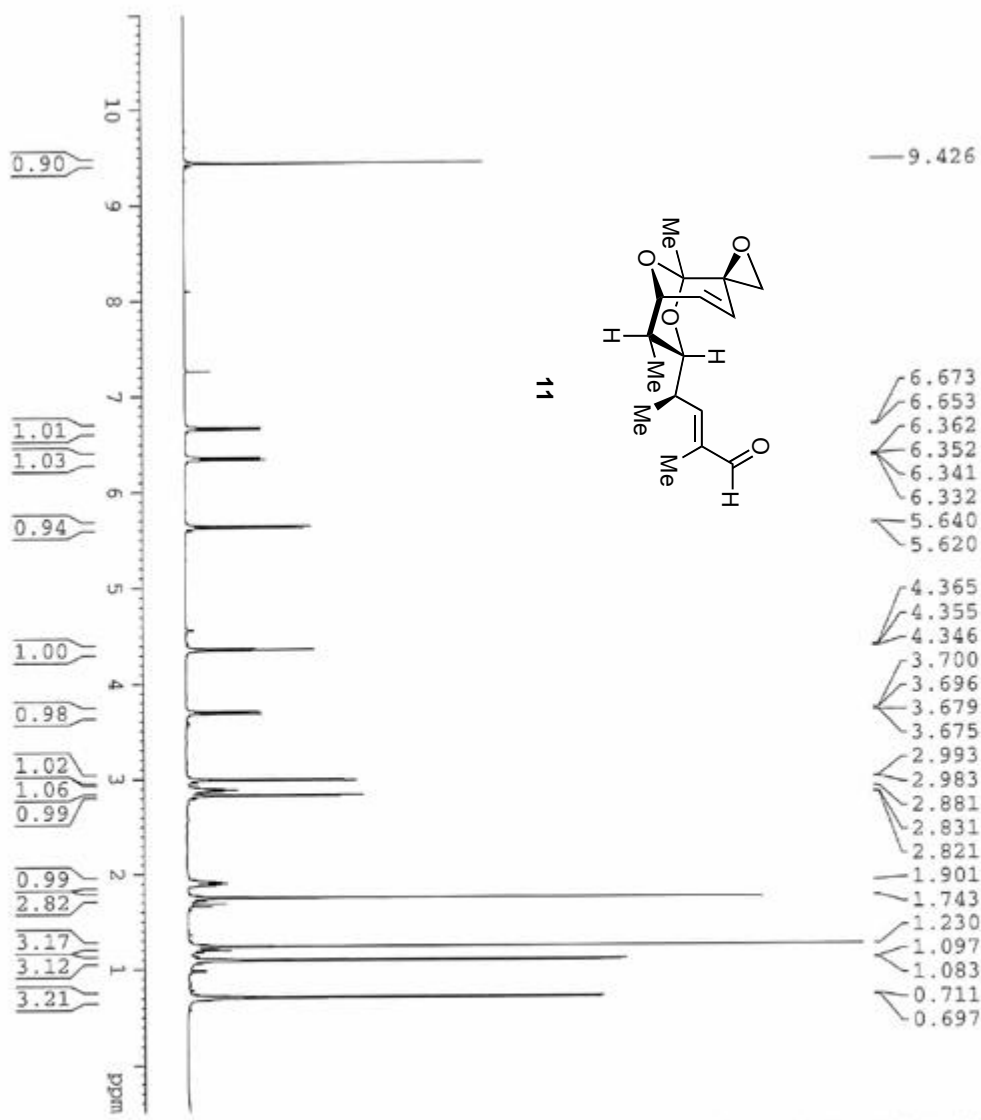

- 9.426
- 6.673
- 6.653
- 6.362
- 6.352
- 6.341
- 6.332
- 5.640
- 5.620
- 4.365
- 4.355
- 4.346
- 3.700
- 3.696
- 3.679
- 3.675
- 2.993
- 2.983
- 2.881
- 2.831
- 2.821
- 1.901
- 1.743
- 1.230
- 1.097
- 1.083
- 0.711
- 0.697

```

NAME          8112287
EXPNO         3
PROCNO        1
Date_         20091026
Time          18.05
INSTRUM       spect
PROBHD        5 mm PAQNP 1H/
PULPROG       zgpg30
TD            64998
SOLVENT       CDCl3
NS            8
DS            0
SWH           7500.000 Hz
FIDRES       0.166674 Hz
AQ           2.9999166 sec
RG           64
DM           56.667 um
DE           71.43 um
TE           295.1 K
D1           3.00000000 sec
TD0          1

===== CHANNEL f1 =====
NUC1          1H
P1           12.00 usec
PL1          0.00 dB
PR1W        24.54113007 W
SFO1         500.1335009 MHz
SI           16384
SF           500.1300078 MHz
WDW          EM
SSB          0
LB           0.30 Hz
GB           0
PC           1.00
  
```

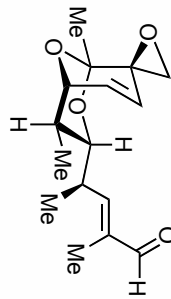

11

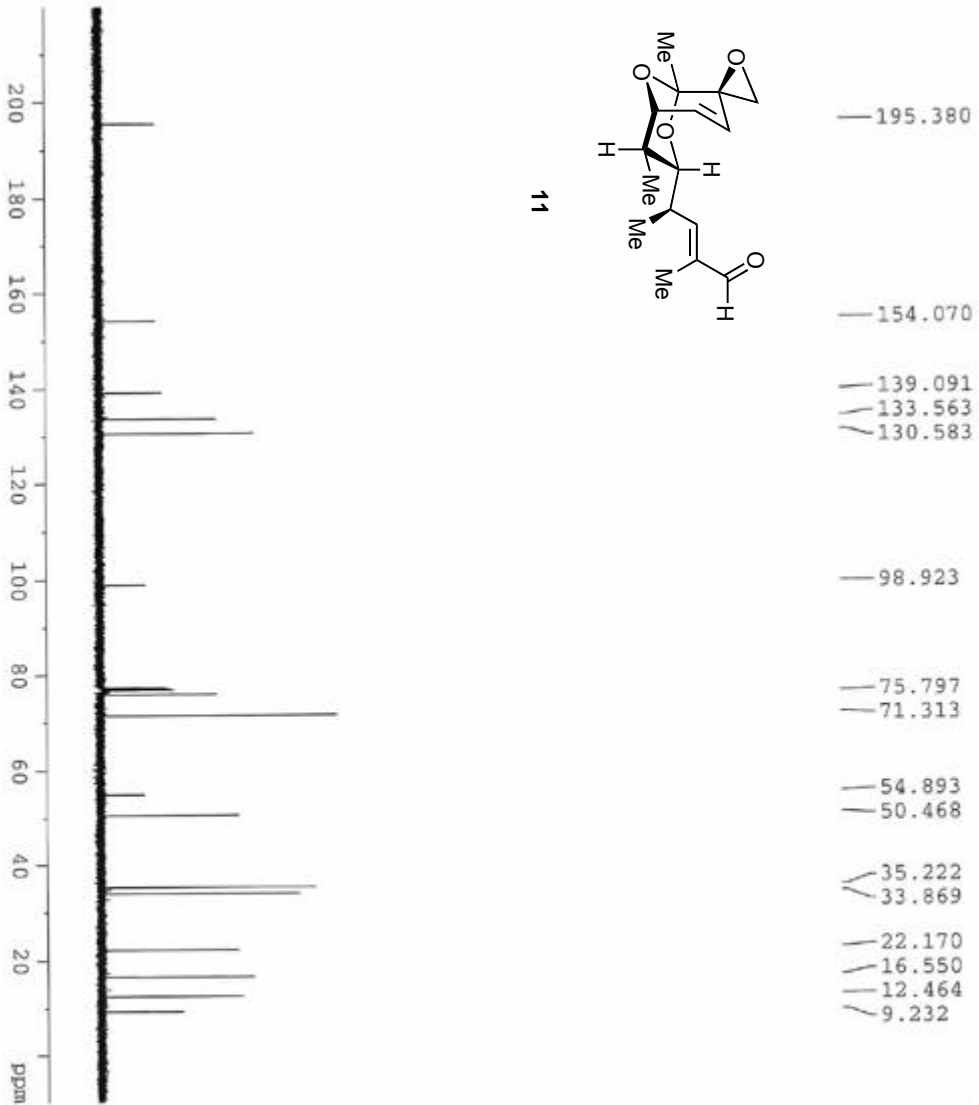

```

NAME          al12287
EXPNO         11
PROCNO        1
Date_         20091026
Time          18.12
INSTRUM       spect
PROBHD        5 mm PQAQNP 1H/
PULPROG       zgpg
TD            65786
SOLVENT       CDCl3
NS            12
DS            4
SWH           32884.718 Hz
FIDRES        0.500026 Hz
AQ            0.9999975 sec
RG            2050
DM            15.200 usec
DE            6.00 usec
TE            295.2 K
D1            4.00000000 sec
D11           0.03000000 sec
TDO           1

***** CHANNEL F1 *****
NUC1          13C
P1            8.00 usec
PL1           1.00 dB
PL1W          72.42802429 W
SFO1          125.7728799 MHz

***** CHANNEL F2 *****
CEPDESGZ     waltz16
NUC2          1H
PCPD2        80.00 usec
PL2           0.00 dB
PL2W         16.50 dB
PL3          17.00 dB
PL3W         24.54113007 W
PL2W         0.54840748 W
PL1W         0.48865894 W
SFO2          500.1325006 MHz
SI            131072
SR            125.7577943 MHz
WDW           EM
SSB           0
LB            0.30 Hz
GB            0
PC            1.40
  
```

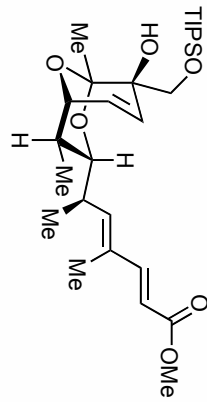

32

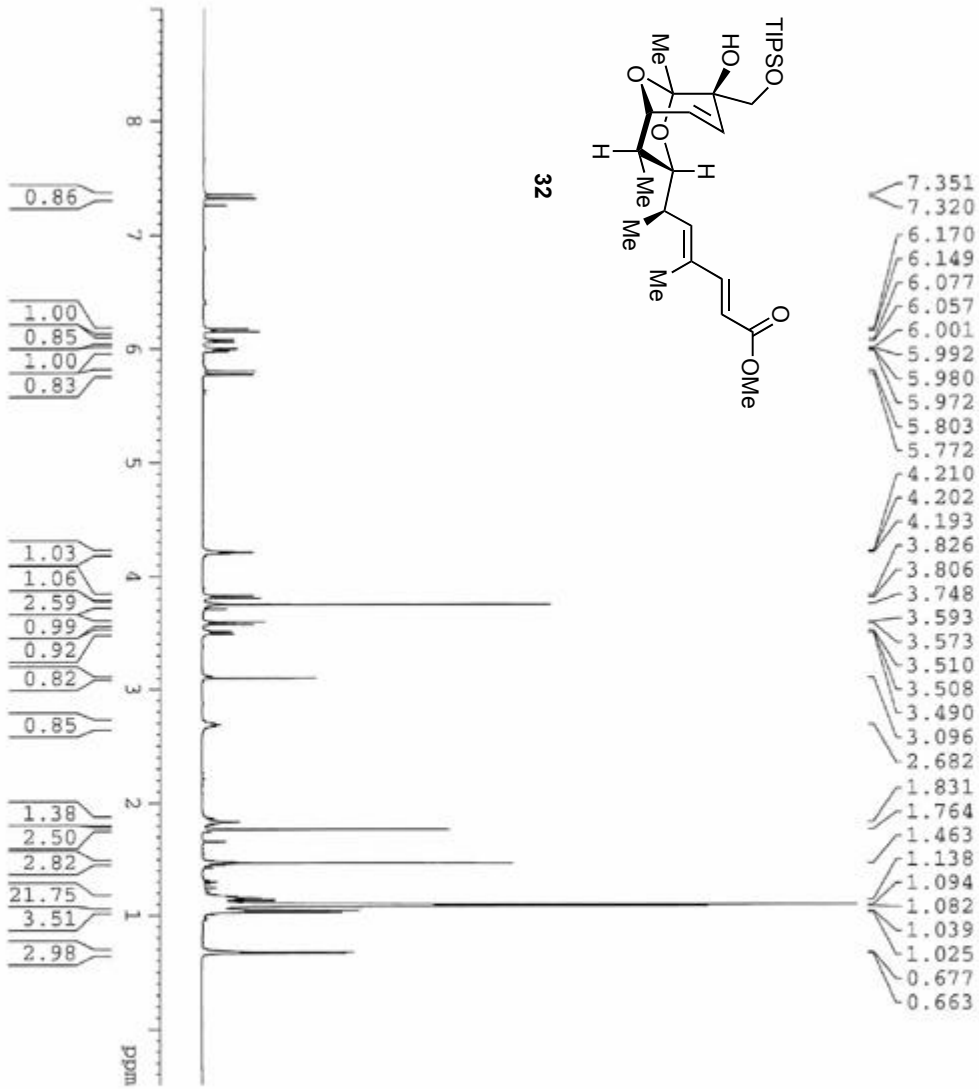

```

NAME          ac12053
EXPNO         1
PROCNO       20090407
Date_        11.22
Time         11.22
INSTRUM      spect
PROBHD       5 mm P4NP 1H/
PULPROG      zg
TD           44988
SOLVENT      CDCl3
NS           8
DS           0
SWH          7500.000 Hz
FIDRES      0.16674 Hz
AQ          2.999166 sec
RG           45.2
DM          66.667 usec
DE          71.43 usec
TE           295.0 K
D1           3.00000000 sec
TD0          1

===== CHANNEL f1 =====
NUC1         1H
P1          12.00 usec
PL1         0.00 dB
PALW       24.54113007 W
SFO1       500.1335009 MHz
SI         16384
SF         500.1300079 MHz
WDW         RM
SSB         0
GB          0.30 Hz
PC          1.00
  
```

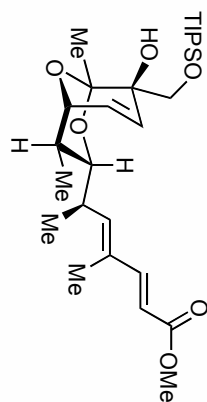

32

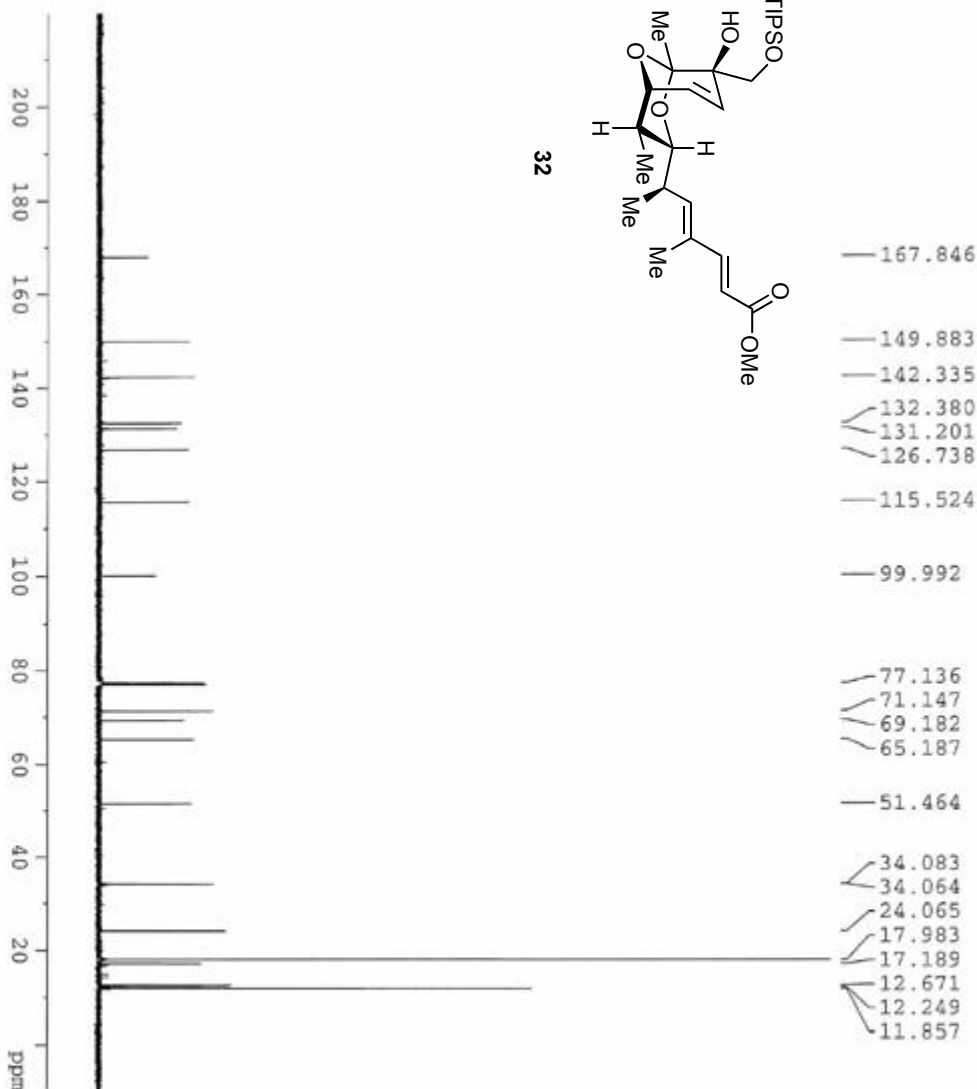

```

NAME          c112053
EXPNO         2
PROCNO       1
Date_         20090407
Time         11.31
INSTRUM      spect
PROBHD       5 mm BBOCP 1H/
PULPROG      zgpg
TD            65786
SOLVENT      CDCl3
NS            119
DS            4
SWH           32694.738 Hz
FIDRES       0.500026 Hz
AQ            0.999972 sec
RG            2050
DMW          15.200 usec
DE            6.00 usec
TE            295.4 K
D1            4.00000000 sec
D11           0.03000000 sec
SFO          125
===== CHANNEL f1 =====
NUC1          13C
P1            8.00 usec
PL1           1.00 dB
PL1W          72.42802429 W
SFO1          125.7728799 MHz
===== CHANNEL f2 =====
CPDPRG2      waltz16
NUC2          1H
PCPD2        80.00 usec
PL2           0.00 dB
PL2W          16.50 dB
PL13         17.00 dB
PL2W         24.56111007 W
PL17W        0.56940748 W
SFO2          500.1325008 MHz
SI            131.072
SF           125.7577890 MHz
WOW           0
SSB           0
LB            0.30 Hz
GB            0
PC            1.40

```

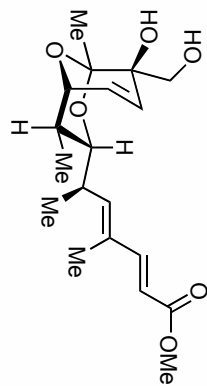

68

- 7.356
- 7.325
- 6.311
- 6.290
- 6.058
- 6.038
- 6.022
- 6.013
- 6.001
- 5.993
- 5.809
- 5.777
- 4.173
- 4.165
- 4.156
- 3.748
- 3.737
- 3.713
- 3.709
- 3.574
- 3.571
- 3.553
- 3.550
- 3.497
- 3.473
- 2.675
- 2.471
- 2.300
- 1.825
- 1.765
- 1.763
- 1.451
- 1.042
- 1.029
- 0.681
- 0.667

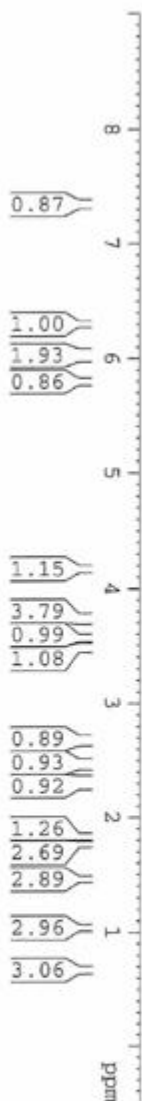

```

NAME          #E12056
EXPNO         1
PROCNO       1
DATE_        20090409
TIME         14.37
INSTRUM      spect
PROBHD       5 mm PAQNP 1H/
PULPROG      zg
TD           44998
SOLVENT      CDCl3
NS           8
DS           0
SWH          7500.000 Hz
FIDRES      0.166674 Hz
AQ          2.999166 sec
RG           64
DW          66.667 usec
DE          71.43 usec
TR          295.3 K
DL           3.00000000 sec
TD0          1

***** CHANNEL f1 *****
NUC1          1H
P1           12.00 usec
PL1          0.00 dB
PL1W        24.54113007 W
SFO1        500.1335009 MHz
SI           16384
SR          500.1300078 MHz
WDW          EM
SSB          0
LB          0.30 Hz
GB           0
PC           1.00
  
```

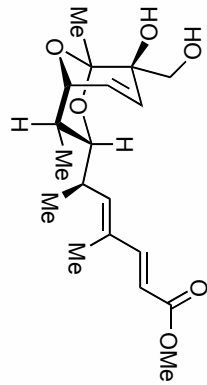

- 167.908
- 149.880
- 142.128
- 132.501
- 130.890
- 127.675
- 115.572
- 100.497
- 77.155
- 71.372
- 69.576
- 64.243
- 51.499
- 34.182
- 34.020
- 24.021
- 17.044
- 12.659
- 12.258

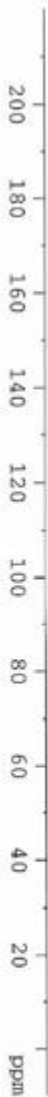

```

NAME          REL2055
EXPNO         2
PROCNO        1
Date_         20090409
Time         14.44
INSTRUM       spect
PROBHD        5 mm PAKMP 1H/
PULPROG       zgpg
TD            65364
SOLVENT       CDCl3
NS           175
DS           4
SWH          32894.738 Hz
FIDRES       0.500626 Hz
AQ          0.9999972 sec
RG           2050
DM          15.200 usec
DE          6.00 usec
TE          296.0 K
D1          4.00000000 sec
D11         0.03000000 sec
TDO         1

===== CHANNEL f1 =====
NUC1          13C
P1           8.00 usec
PL1          1.00 dB
PL1W         72.42802429 W
SFO1         125.7728799 MHz

===== CHANNEL f2 =====
CPDPRG2      waltz16
NUC2          1H
PCPD2        80.00 usec
PL2          0.00 dB
PL12         16.50 dB
PL13         17.00 dB
PL2W         24.54113007 W
PL1W         0.54940748 W
PC12W        0.48965994 W
SFO2         500.1325005 MHz
SI           131072
SF           125.7577890 MHz
WDW          EM
SSB          0
GB          0.30 Hz
PC           1.40
  
```

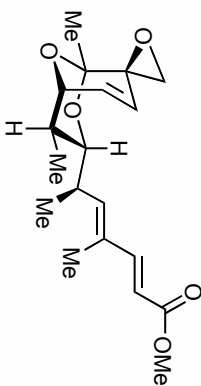

Methyl Streptolate (33)

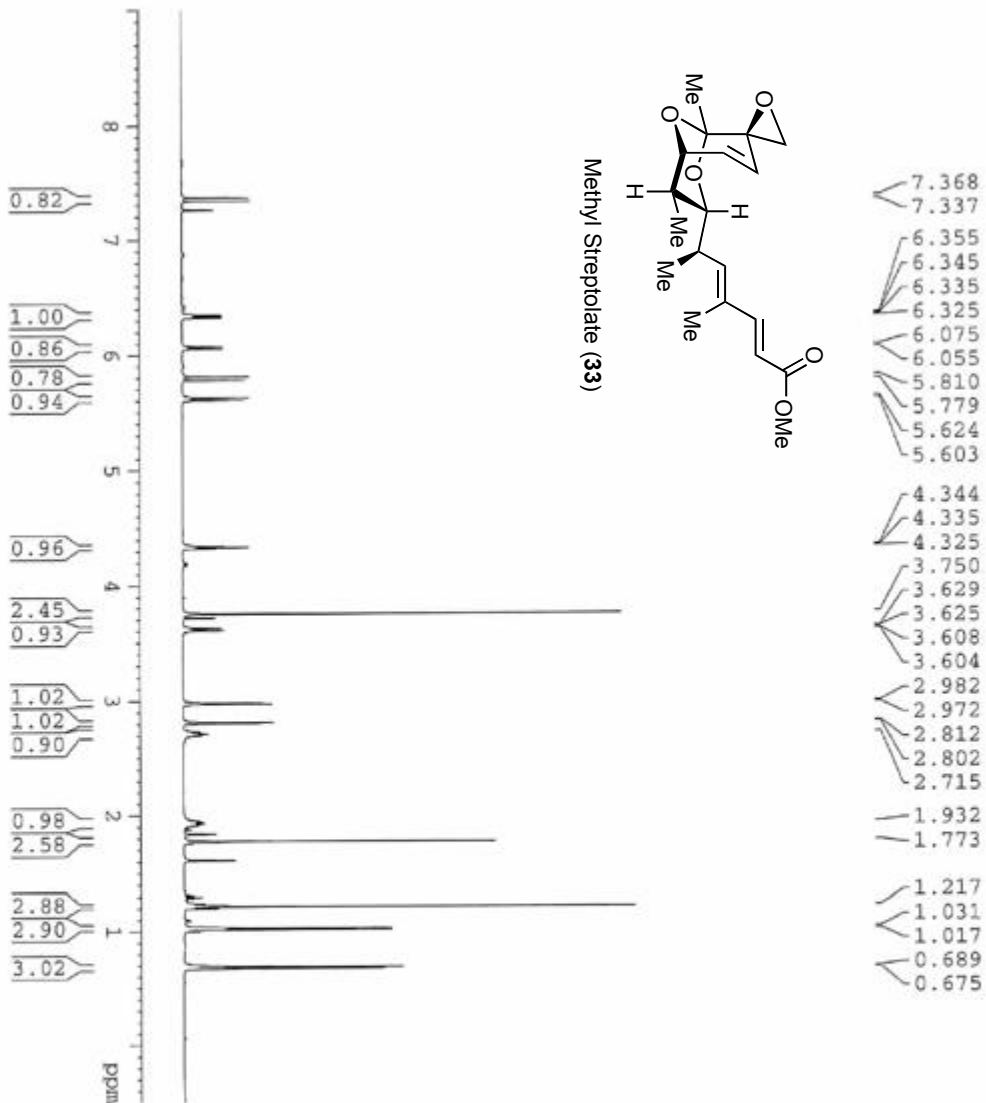

```

NAME          st12058
EXPNO         2
PROCNO        1
Date_         20090410
Time          12.22
INSTRUM       spect
PROBHD        5 mm PAQNP 1H/
PULPROG       zgpg30
TD            44998
SOLVENT       CDCl3
NS            8
DS            0
SWH           7500.000 Hz
FIDRES        0.166674 Hz
AQ            2.999166 sec
RG            144
WDW           66.667 use
DE            71.43 use
TE            294.5 K
D1            3.00000000 sec
TD0           1

***** CHANNEL f1 *****
NUC1          1H
P1            12.00 usec
PL1           0.00 dB
PL1W          24.54113007 W
SFO1          500.1315009 MHz
SI            16384
SF           500.1300086 MHz
WDW           EM
SSB           0
LB            0.30 Hz
GB            0
PC            1.00
  
```



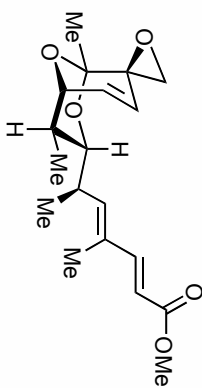

Methyl Streptolate (33)

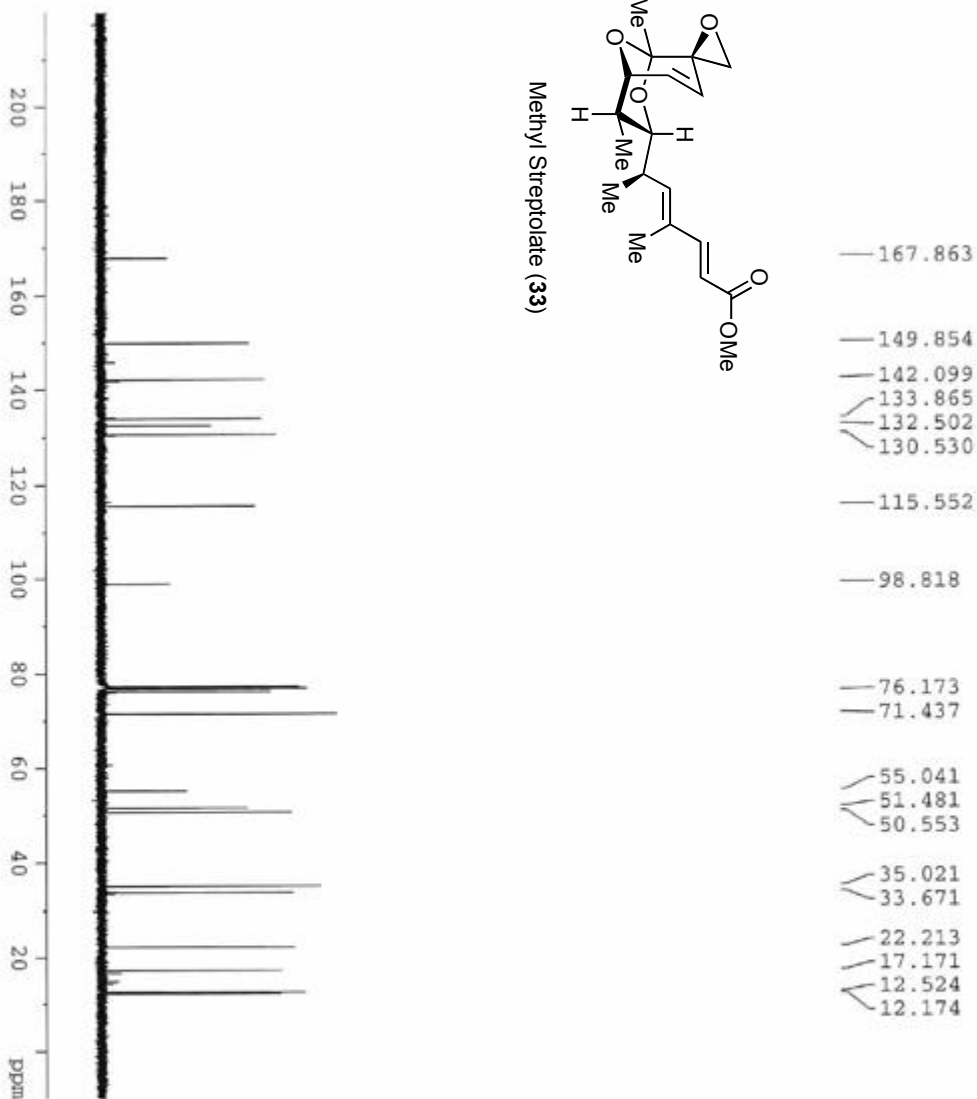

```

NAME          et12058
EXPNO         21
PROCNO        1
Date_         20090410
Time          13.04
INSTRUM       spect
PROBHD        5 mm PBOCP 1H/
PULPROG       zgpg
TD            65536
SOLVENT       CDCl3
NS            2074
DS            4
SWH           32894.738 Hz
FIDRES        0.500026 Hz
AQ            0.9999972 sec
RG            2050
DW            15.200 usec
DE            6.00 usec
TE            295.3 K
D1            4.00000000 sec
D11           0.03000000 sec
TD0           1

===== CHANNEL f1 =====
NUC1          13C
P1            8.00 usec
PL1           1.00 dB
PULPR1        72.42802429 M
SFO1          125.7728799 MHz

===== CHANNEL f2 =====
CPDPRG2       waltz16
NUC2          1H
PCPD2         80.00 usec
PL2           0.00 dB
PL12          16.50 dB
PL13          17.00 dB
PL12W         24.54113007 W
PL13W         0.54940748 W
SFO2          500.1325006 MHz
SI            131072
SF            125.7577890 MHz
NUC3          0
SSB           0
LB            0.30 Hz
GB            0
PC            1.40
  
```

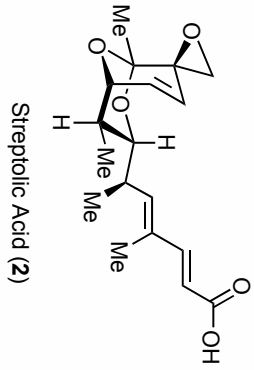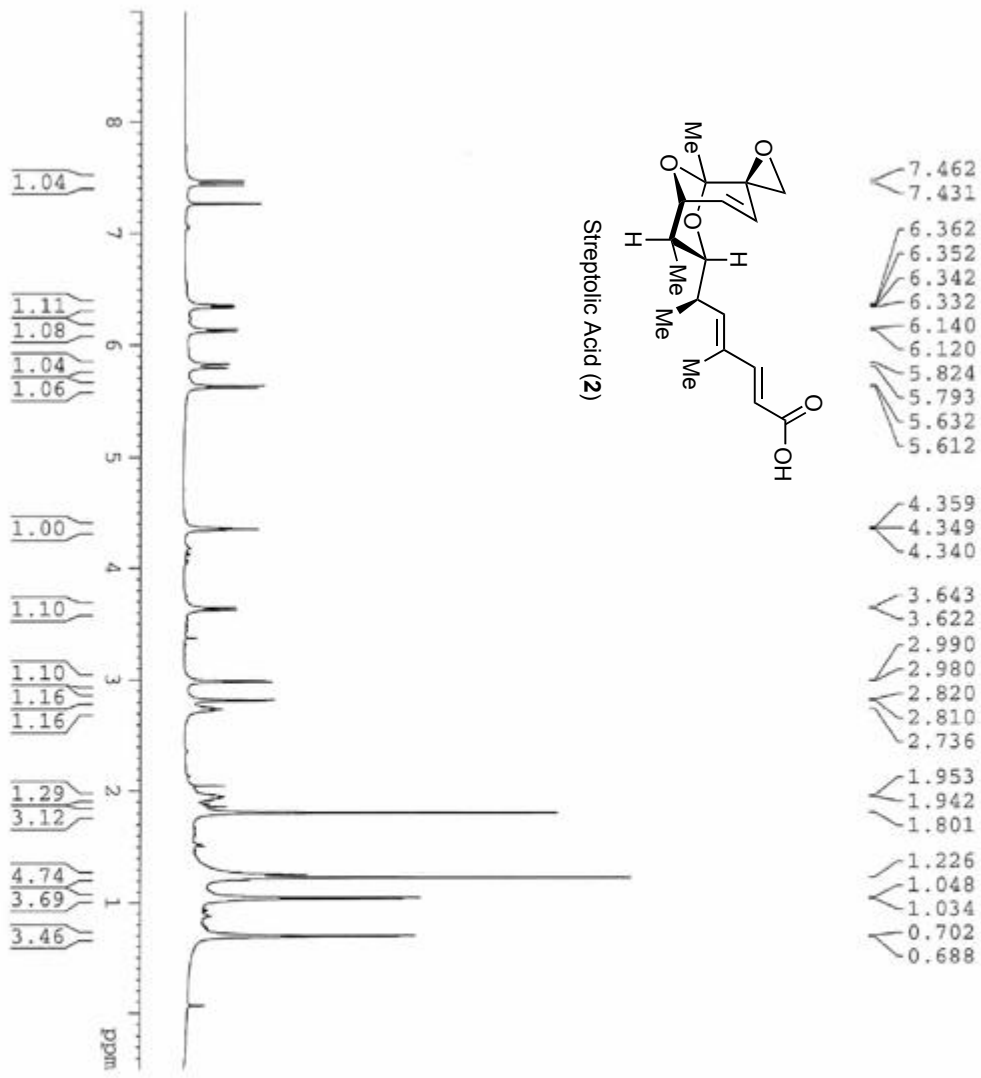

- 7.462
- 7.431
- 6.362
- 6.352
- 6.342
- 6.332
- 6.140
- 6.120
- 5.824
- 5.793
- 5.632
- 5.612
- 4.359
- 4.349
- 4.340
- 3.643
- 3.622
- 2.990
- 2.980
- 2.820
- 2.810
- 2.736
- 1.953
- 1.942
- 1.801
- 1.226
- 1.048
- 1.034
- 0.702
- 0.688

- 1.04
- 1.11
- 1.08
- 1.04
- 1.06
- 1.00
- 1.10
- 1.10
- 1.16
- 1.16
- 1.29
- 3.12
- 4.74
- 3.69
- 3.46

```

NAME          8E13036
EXPNO         5
PROCNO       20091214
Date_        10.46
Time         10.46
INSTRUM      spect
PROBHD       5 mm PABBI 1H/
PULPROG      zg
TD           45044
SOLVENT      CDCl3
NS           8
DS           0
SMF          7507.507 Hz
PTDRES       0.166671 Hz
AQ           2.9999804 sec
RG           45.3
DM           65.600 usec
DE           7.50 usec
TE           297.0 K
DE          1.00000000 sec
D1           1
TD0          1

***** CHANNEL f1 *****
NUC1          1H
P1           5.35 usec
PL1          0.00 dB
SFO1         499.8734991 MHz
SI           32768
SF           499.8700173 MHz
WDW          EM
SSB          0
LB           0.10 Hz
GB           0
PC           1.00
  
```

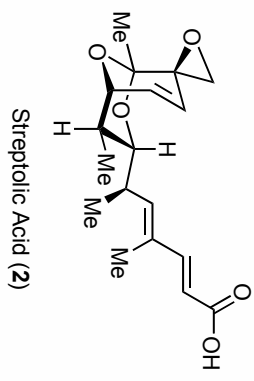

- 172.482
- 151.974
- 143.347
- 133.828
- 132.554
- 130.520
- 115.056
- 98.830
- 76.126
- 71.409
- 55.035
- 50.542
- 35.034
- 33.739
- 22.186
- 17.116
- 12.515
- 12.168

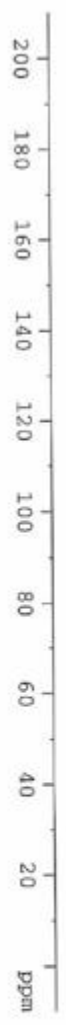

```

NAME: at13016
EXPNO: 51
PROCNO: 1
Date_ : 20091215
Time: 11.01
INSTRUM: spect
PROBHD: 5 mm QNP 1H
PULPROG: zgpg
TD: 55552
SOLVENT: CDCl3
NS: 641
DS: 4
SWH: 27777.777 Hz
FTHRES: 0.500022 Hz
AQ: 0.3939892 sec
RG: 18.000
WDW: EM
SSB: 0
LB: 100.0 K
GB: 0
TE: 7.50 uspc
T1: 4.00000000 sec
T1RHO: 0.01000000 sec
d11: 0.01000000 sec

===== CHANNEL f1 =====
NUC1: 13C
P1: 8.00 uspc
PL: 3.00 dB
SFO1: 125.7701148 MHz

===== CHANNEL f2 =====
CPDPRG2: waltz16
NUC2: 1H
PCPD2: 90.00 uspc
PL2: 120.00 dB
PL12: 20.00 dB
SFO2: 500.138000 MHz
SI: 32768
SF: 125.7577924 MHz
WDW: EM
SSB: 0
LB: 1.00 Hz
GB: 0
PC: 1.40

```

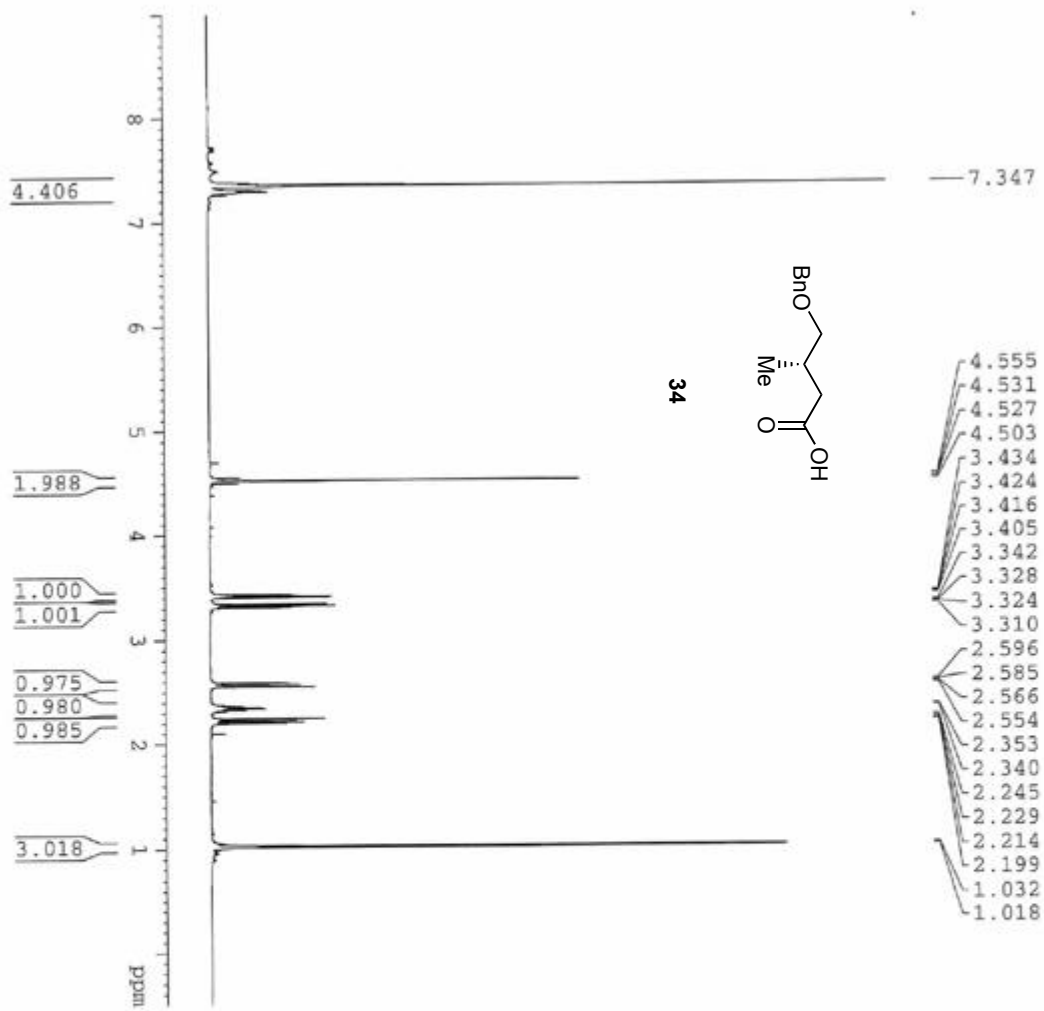

NAME ac12279  
 EXPTNO 5  
 PROCNO 1  
 Date\_ 20100602  
 Time 18:20  
 INSTRUM spect  
 PROBRD 5 mm vnp 1H  
 F2PROC4 45044  
 TD  
 SOLVENT Acetone  
 NS 8  
 DS 0  
 SMT 7507.507 Hz  
 FIDRES 0.16621 Hz  
 AQ 2.9399804 sec  
 SFO 16  
 AQ 66.600 usec  
 SFO 4.50 usec  
 DS 300.0 K  
 TE 300.0 K  
 DI 1.00000000 sec

\*\*\*\*\* CHANNEL f1 \*\*\*\*\*  
 NUC1 1H  
 P1 9.00 usec  
 PL 0.00 dB  
 SFO1 500.135009 MHz  
 SI 65536  
 SF 500.1300134 MHz  
 WDW EM  
 SSB 0  
 LB 0.30 Hz  
 GB 0  
 EC 1.00

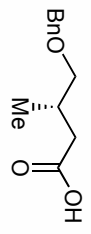

34

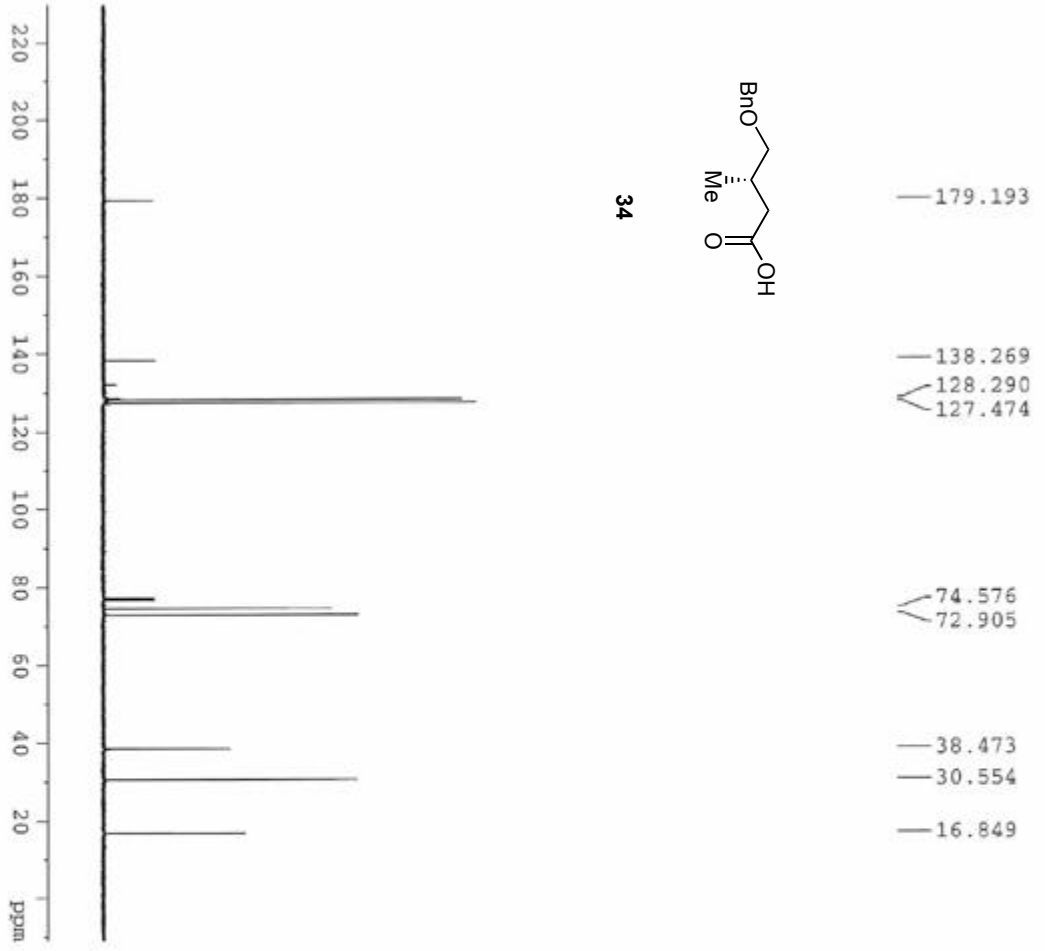

```

NAME          AC12270
EXPNO         31
PROCNO        20100602
Date_         18-24
Time         11:24
INSTRUM       spect
PROBHD        5 mm QNP
PULPROG       zgpg30
TD            65536
SOLVENT       CDCl3
NS           40
DS           4
SMH          30103.031 Hz
FIDRES       0.500033 Hz
AQ           0.9999810 sec
RG           8192
DE           16.560 usec
TE           7.50 usec
T1           300.0 K
D1           3.00000000 sec
D11          0.03000000 sec

===== CHANNEL f1 =====
NUC1          13C
P1           8.00 usec
PL1          -2.00 dB
SFO1         125.771274 MHz

===== CHANNEL f2 =====
CPDPRG2      waltz16
NUC2          1H
PCPD2        90.00 usec
PL2          120.00 dB
PL12         20.00 dB
SFO2         500.138000 MHz
SI           32768
SF           125.7578019 MHz
WDW          EM
SSB          0
LB           1.00 Hz
GB           0
PC           1.40
  
```

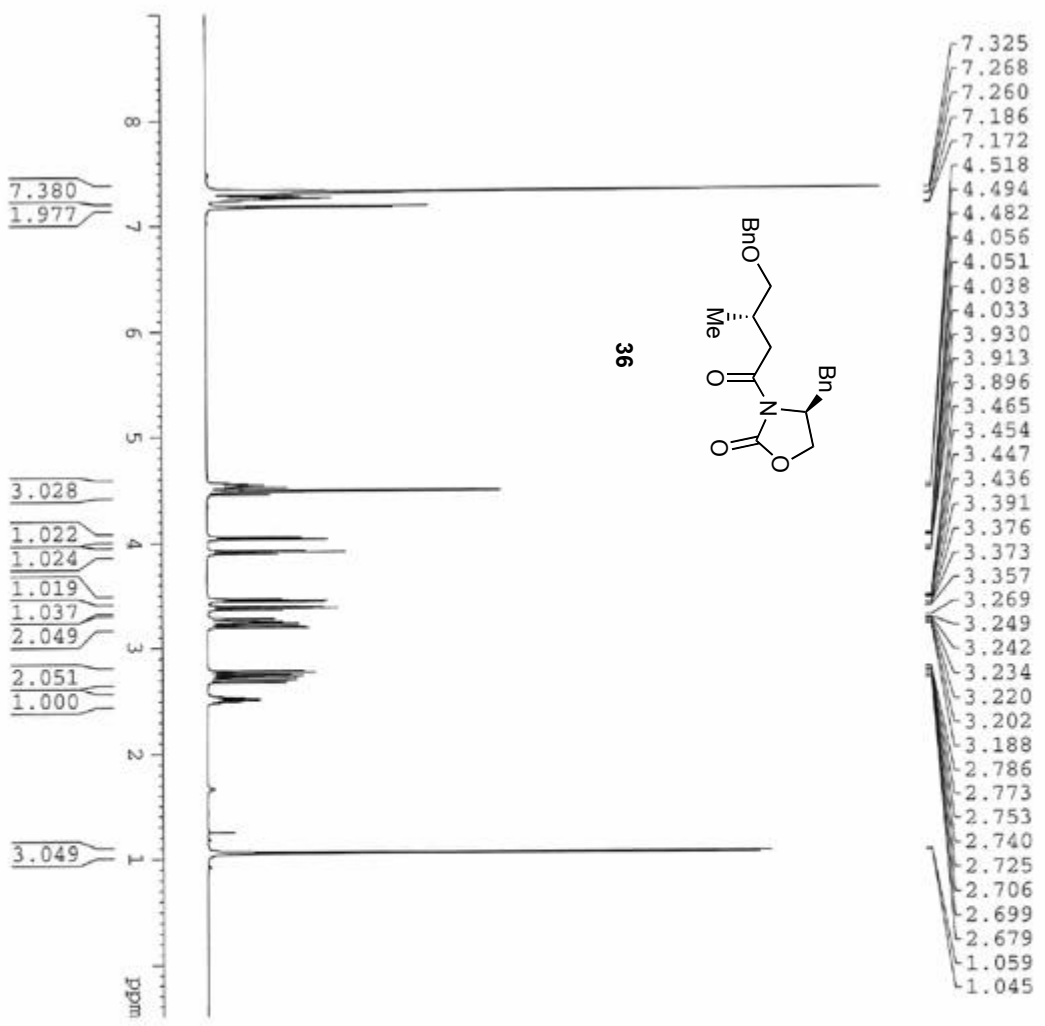

```

NAME          ac12289
EXPNO         5
PROCNO        1
Date_         20100602
Time          18.12
INSTRUM       spect
PROBHD        5 mm QNP 1H
PULPROG       zgpg30
TD             45044
SOLVENT       CDCl3
NS             8
DS             0
SFO1          750.1307 MHz
SFO2          0.1468671 MHz
FIDRES        2.7999893 sec
AQ            66.400 usec
RG            300.0 X
AQ            4.50 usec
DE            300.0 X
TE            300.2 K
D1            1.00000000 sec
----- CHANNEL f1 -----
NUC1           1H
P1            9.40 usec
PL1           0.00 dB
SFO1          500.133009 MHz
SI            65516
SF            500.1300136 MHz
WDW           EM
SSB           0
LB            0.10 Hz
GB            0
PC            1.00

```

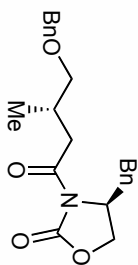

36

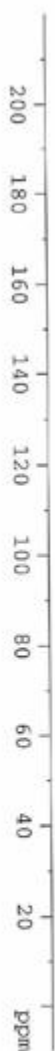

172.579  
153.473  
138.470  
135.344  
129.309  
128.814  
128.211  
127.476  
127.414  
127.176  
75.104  
72.861  
65.868  
55.020  
39.388  
37.888  
30.570  
17.204

```

NAME          AC12239
EXPNO         51
PROCNO        1
Date_         20100602
Time         18.40
INSTRUM       spect
PROBHD        5 mm QNP 1H
PULPROG       zgpg30
TD            60602
SOLVENT       CDCl3
NS           72
DS           4
SWH           30181.011 Hz
F2RES        0.500011 Hz
AQ           0.3999810 sec
RG           16384
TM           16.500 usec
DE           7.50 usec
TE           300.0 K
D1           1.00000000 sec
d11          0.03000000 sec

***** CHANNEL f1 *****
NUC1          13C
P1           8.00 usec
PAL          1.00 dB
SFO1         125.7715724 MHz

***** CHANNEL f2 *****
CPDPRG2       waltz16
NUC2          1H
PCPDZ        90.00 usec
PL2          120.00 dB
PL12         20.00 dB
SFO2         500.1318000 MHz
SI           32768
SF           125.7578019 MHz
WDW          EM
SSB          0
LBR          1.00 Hz
GB           0
PC           1.40
  
```

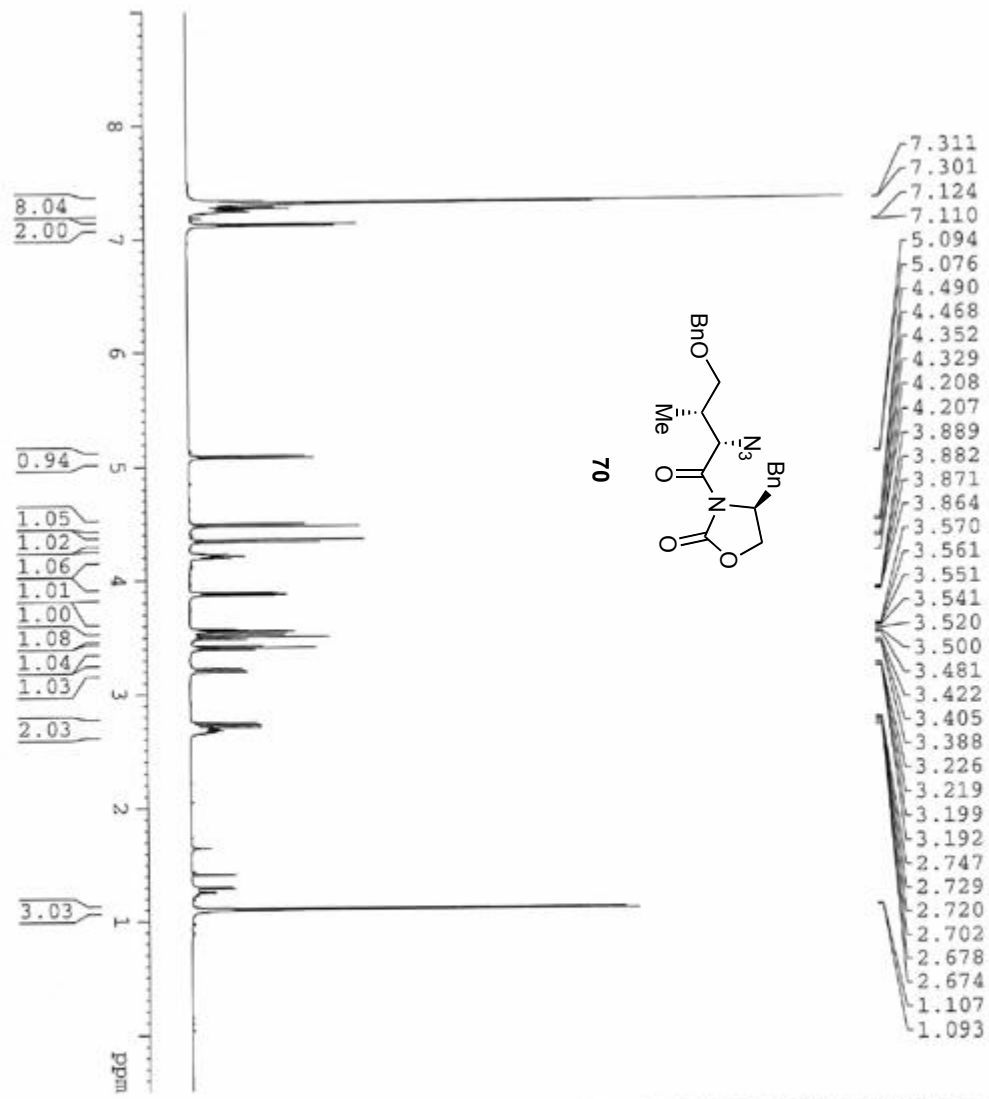

```

NAME          RL12230
EXPNO         1
PROCNO       1
Date_         20090909
Time         15.09
INSTRUM      spect
PROBHD       5 mm PaQNP 1H/
PULPROG      zgpg30
TD           44998
SOLVENT      CDCl3
NS           0
DS           0
SWH          7500.000 Hz
FIDRES      0.166674 Hz
AQ          2.999166 sec
RG           50.8
DW          66.667 usec
DE          71.43 usec
TE          294.1 K
DL          3.00000000 sec
TD0         1

===== CHANNEL f1 =====
NUC1         1H
P1          12.00 usec
PL          0.00 dB
FL1         24.54113007 M
SFO1        500.1321009 MHz
SI          16384
SF          500.1300099 MHz
WDW         EM
SSB         0
GB          0
PC          1.00
  
```



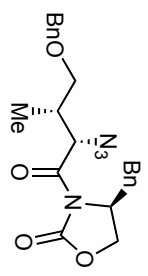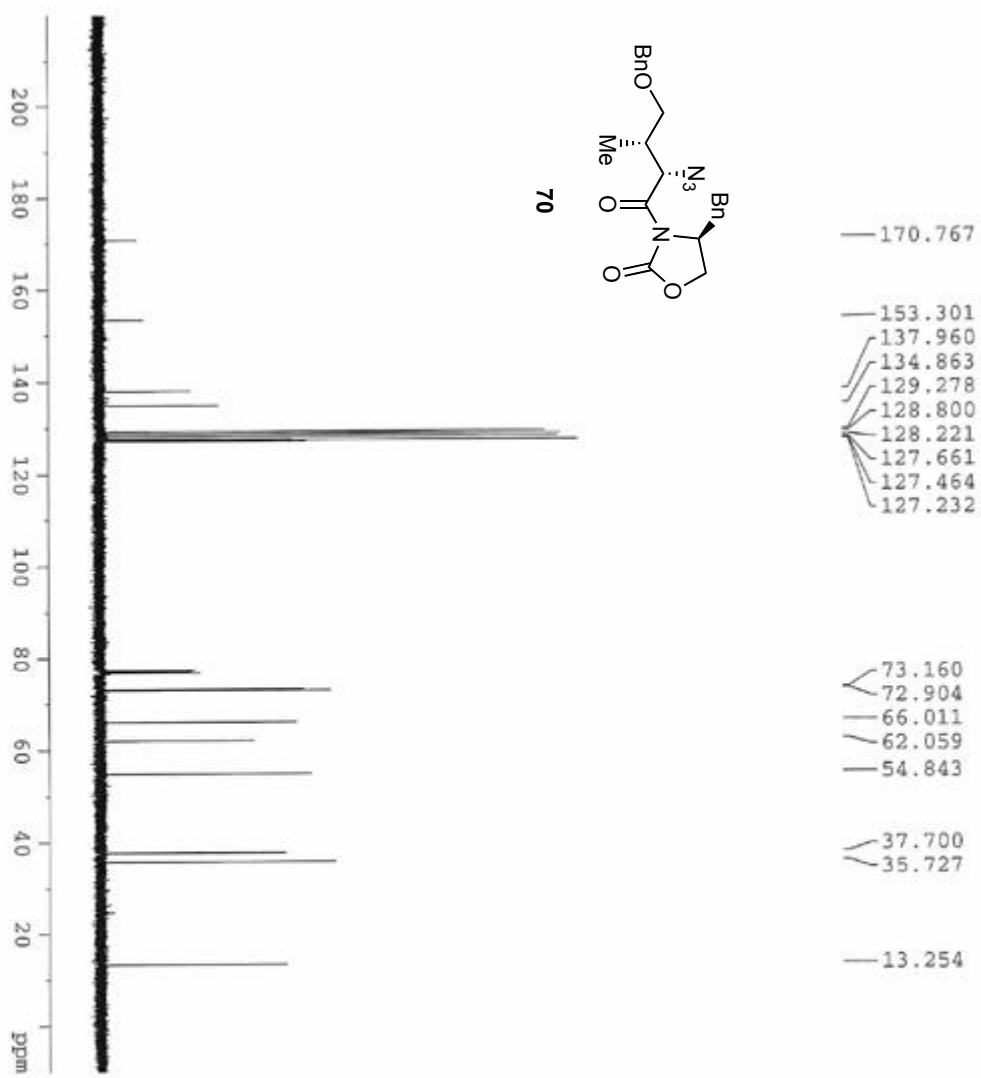

```

NAME          ac122310
EXPNO         2
PROCNO        1
DATE_         20090909
TIME         15.18
INSTRUM       spect
PROBHD        5 mm PACTAR 1H/
PULPROG       zgpg
TD             65786
SOLVENT       CDCl3
NS            16
DS            4
SWH           32894.738 Hz
FIDRES        0.500026 Hz
AQ            0.999972 sec
RG            2050
RG            15.200 usec
DE            6.00 usec
TE            294.5 K
D1            4.00000000 sec
D11           0.03000000 sec
TD0           1

***** CHANNEL f1 *****
NUC1          13C
P1            8.00 usec
PL1           1.00 dB
PL1W          72.42802429 K
SFO1          125.7728799 KHZ

***** CHANNEL f2 *****
CPDPRG02     WATER16
NUC2          1H
PCPD02       80.00 usec
PL2          0.00 dB
PL12         16.50 dB
PL13         17.00 dB
PL1W         24.54113007 W
PL1ZW        0.54940748 W
PL13W        0.48965994 W
SFO2         500.1325006 MHE
SI           131072
SF           125.7578005 MHE
WDW          RM
SSB          0
GB           0.30 Hz
CA           0
PC           1.40

```

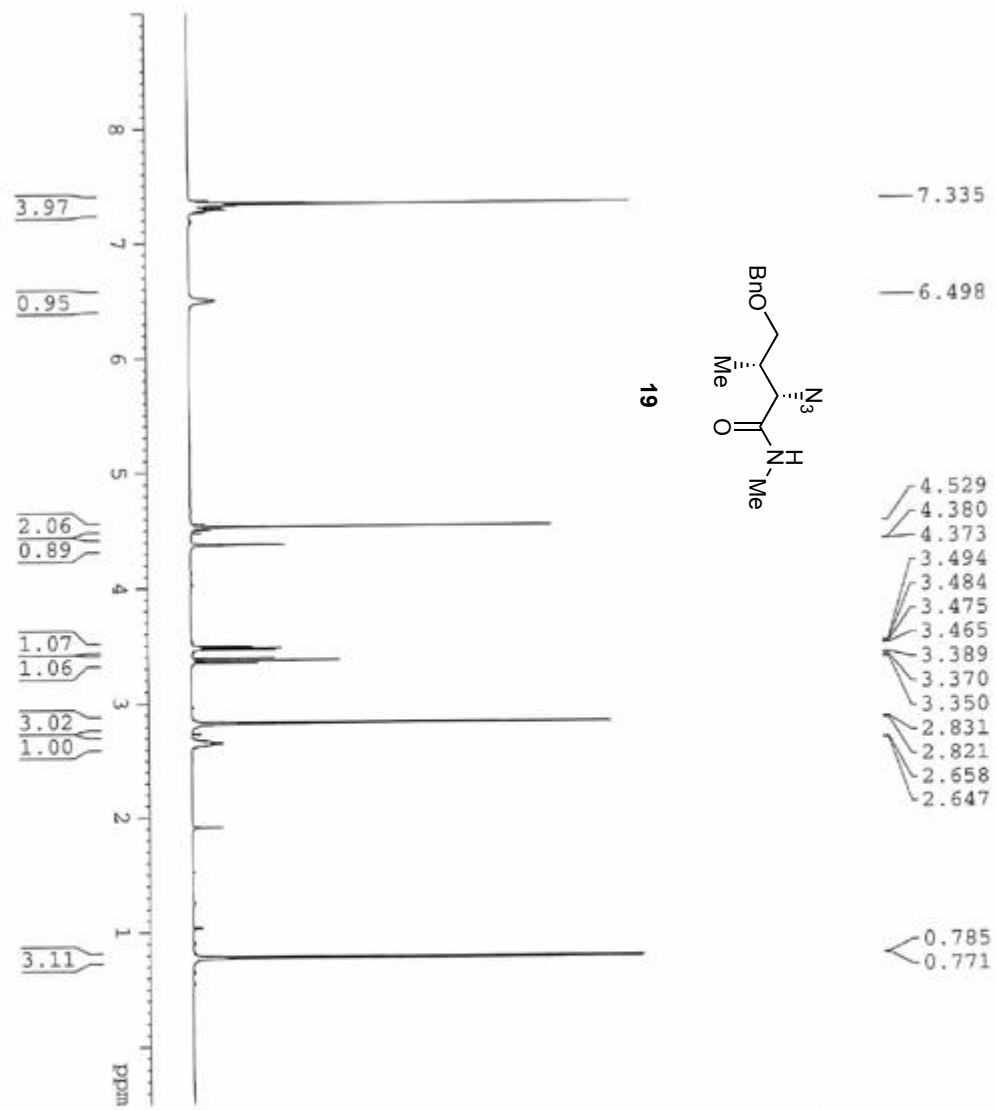

```

NAME          at12231
EXPNO         2
PROCNO        1
Date_         20090910
Time         10.08
INSTRUM       spect
PROBHD        5 mm QNP1H/
PULPROG       zg
TD            44998
SOLVENT       CDCl3
NS            8
DS            0
SWH           7500.000 Hz
FIDRES        0.166674 Hz
AQ            2.9999166 sec
RG            57
AQ            57
DE            66.667 usec
TE            294.3 K
D1            3.00000000 sec
TD0           1

===== CHANNEL f1 =====
NUC1          1H
P1            12.00 usec
PL1           0.00 dB
PC1           24.5411007 K
PULPRG        zgpg30
SFO1          500.133809 MHz
SI            16384
SF            500.130077 MHz
WDW           EM
SSB           0
LB            0.30 Hz
GB            0
PC            1.00
  
```

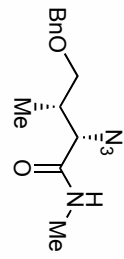

19

- 169.838
- 138.005
- 128.409
- 127.771
- 127.710
- 73.034
- 71.589
- 65.703
- 36.380
- 26.134
- 10.734

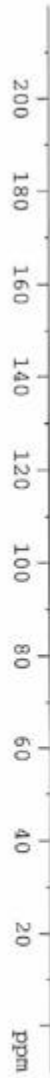

```

NAME          6512231
EXPNO         21
PROCNO        1
Date_         20090910
Time         10.14
INSTRUM       spect
PROBHD        5 mm BBOHNP 1H/
PULPROG       zgpg
TD            65786
SOLVENT       CDCl3
NS            16
DS            4
SWH           12894.738 Hz
FIDRES        0.500026 Hz
AQ            0.9929272 sec
RG            2050
IRY           15.200 usec
DE            6.00 usec
TE            294.6 K
D1            4.00000000 sec
D11           0.03000000 sec
TD0           1

===== CHANNEL f1 =====
NUC1          13C
P1            8.00 usec
PL1           1.00 dB
PL1W          72.42802429 W
SFO1          125.7728799 MHz

===== CHANNEL f2 =====
CPDPRG2       waltz16
NUC2          1H
PCPD2         80.00 usec
PL2           0.00 dB
PL12          16.50 dB
PL13          17.00 dB
PL2W          24.54113007 W
PL12W         0.54940748 W
PL13W         0.48965994 W
SFO2          500.1325006 MHz
SI            131072
SF            125.7577890 MHz
NDW           0
SSB           0
LB            0.30 Hz
GB            0
PC            1.40
  
```

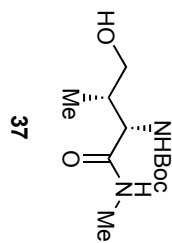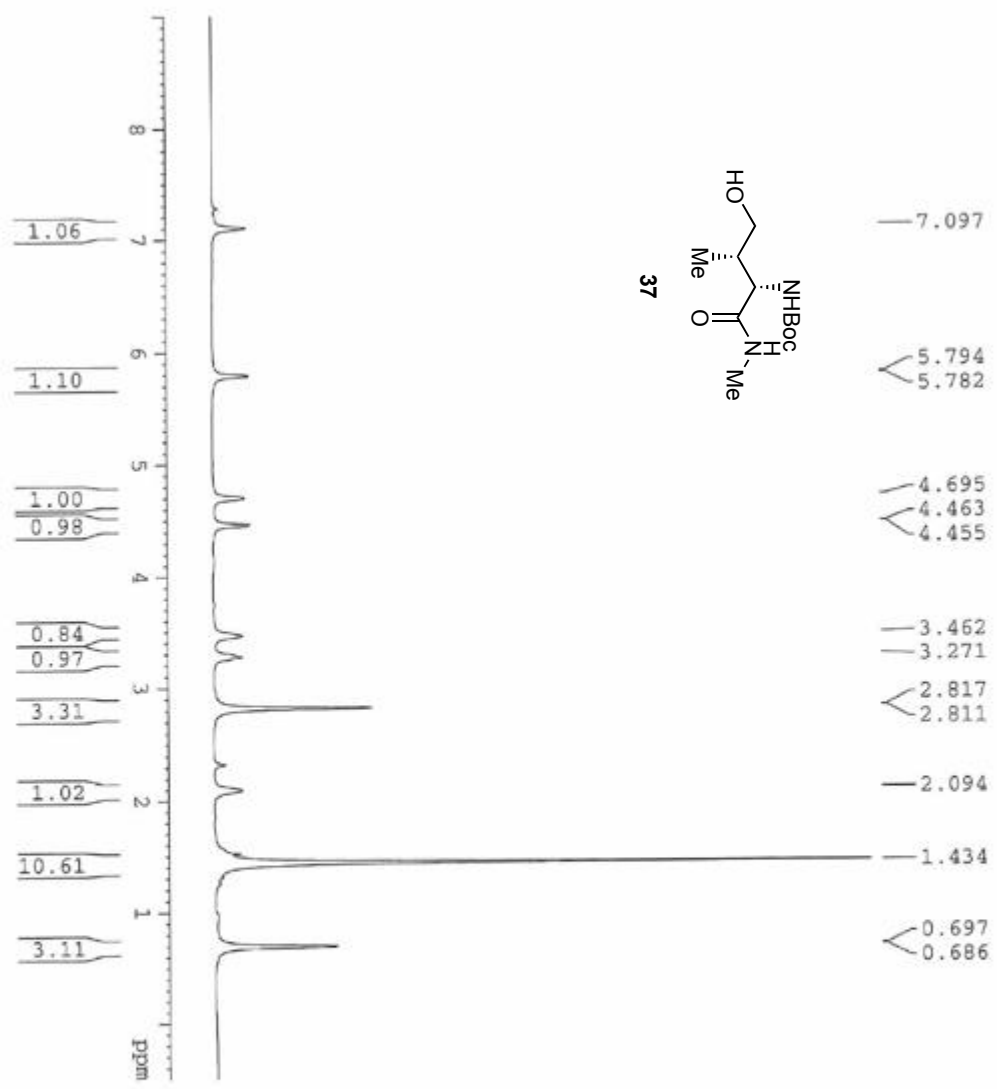

```

NAME          sl12232
EXPNO         2
PROCNO       1
DATE_        20090911
TIME         11.24
INSTRUM      spect
PROBHD       5 mm P/QNP 1H/
PULPROG      zg
TD           44998
SOLVENT      CDCl3
NS           8
DS           0
SFO          7500.000 Hz
FIDRES       0.166674 Hz
AQ           2.9999166 sec
RG           452
MS           66.667 usec
DE           1.43 usec
TE           294.2 K
D1           3.00000000 sec
TD0          1

----- CHANNEL f1 -----
NUC1          1H
P1           12.00 usec
PL1          0.00 dB
PL12         24.54113007 W
SFO1         500.1335009 MHz
SI           16384
SF           500.1300000 MHz
WDW          EM
SSB          0
LB           0.30 Hz
GB           0
PC           1.00
  
```

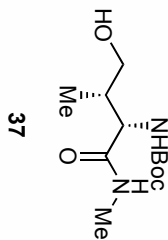

- 171.658
- 157.308
- 80.326
- 64.021
- 53.376
- 39.830
- 28.182
- 26.265
- 10.136

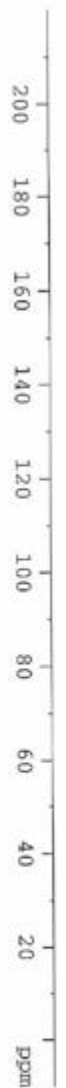

```

NAME          ST12232
EXPNO         21
PROCNO        1
Date_         20090911
Time         11.31
INSTRUM       spect
PROBHD        5 mm PAQNP 1H/
PULPROG       zgpg
TD            65786
SOLVENT       CDCl3
NS           48
DS           4
SWH          32894.738 Hz
FIDRES       0.500026 Hz
AQ          0.999972 sec
RG          2050
DF          15.200 usec
DE          6.00 usec
TE          294.6 K
D1          4.00000000 sec
D11         0.03000000 sec
TD0         1

===== CHANNEL f1 =====
NUC1         13C
P1          8.00 usec
PL1         1.00 dB
PL1W        72.42802429 W
SFO1        125.7728799 MHz

===== CHANNEL f2 =====
CPDPRG2     waltz16
NUC2         1H
PCPDZ       80.00 usec
PL2         0.00 dB
PL12        18.50 dB
PL13        17.00 dB
PL1W        24.54113007 W
PL1ZW       0.54840748 W
PL13W       0.48965994 W
SFO2        500.1325006 MHz
SI          131072
SF          125.7577950 MHz
WDW         EM
SSB         0
GB          0
PC          1.40
  
```

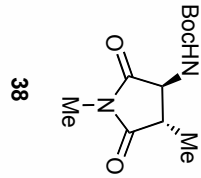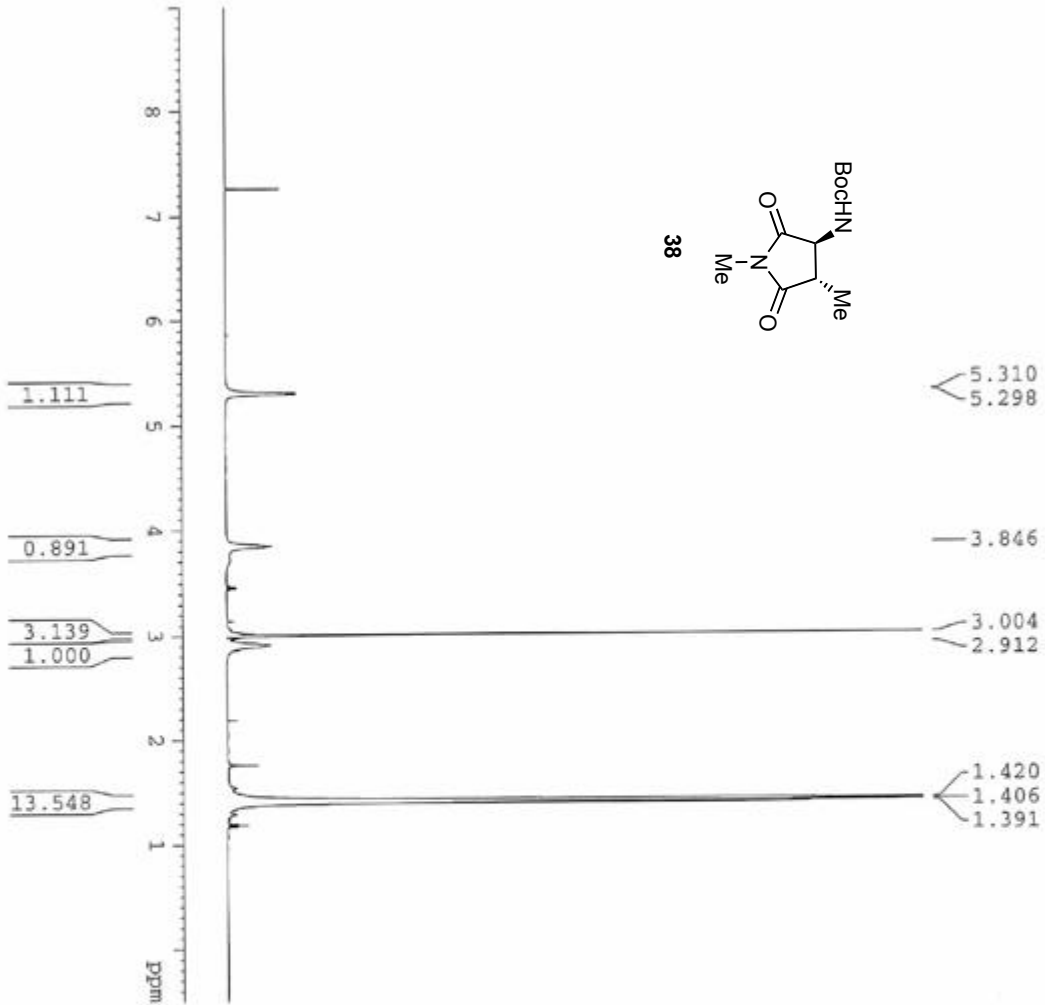

```

NAME          #13901
EXPNO         5
PROCNO        1
Date_         ' 20100602
Time         18.44
INSTRUM       spect
PROBHD        5 mm QNP 1H
PULPROG       zgpg30
TD            45044
SOLVENTF1    CDCl3
NS           8
DS           0
SWH          7507.507 Hz
FIDRES       0.146602 Hz
AQ           2.7979817 sec
RG           66.600
AQ           4.50 usec
DE           100.0 K
TE           300.2 K
D1           1.00000000 sec
DI

===== CHANNEL f1 =====
NUC1          1H
P1           9.00 usec
PL1          0.00 dB
SFO1         500.135009 MHz
SI           65536
SF           500.1300134 MHz
WDW          EM
SSB          0
LB           0.30 Hz
GB           0
PC           1.00
  
```

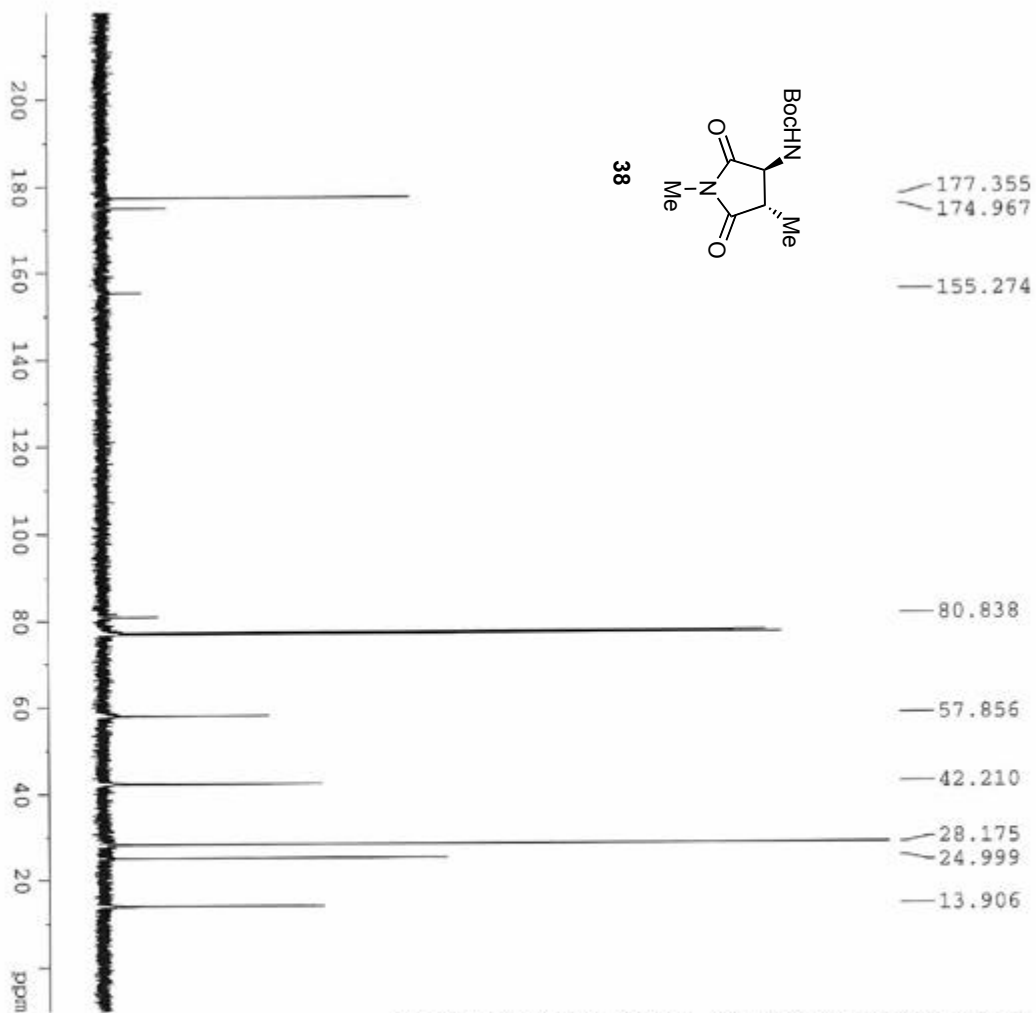

```

NAME          RL13001
EXPNO         51
PROCNO        1
Date_         20100602
Time         18.49
INSTRUM       spect
PROBHD        5 mm QNP 1H
PULPROG       zgpg
TD            65536
SOLVENT       CDCl3
NS           360
DS           4
SWH          30303.011 Hz
FIDRES       0.506013 Hz
AQ           0.999810 sec
RG           16388
WDW          EM
SSB          0
GB           0
PC           300.0 K
D1           3.00000000 sec
d11          0.03000000 sec

***** CHANNEL f1 *****
NUC1          13C
P1           8.00 usec
PL           3.00 dB
SFO1         125.7715724 MHz

***** CHANNEL f2 *****
CPDPRG2      waltz16
NUC2          1H
PCPD2        90.00 usec
PL2          120.00 dB
PL12         20.00 dB
SFO2         500.138000 MHz
SI           32768
SF           125.757954 MHz
WDW          EM
SSB          0
GB           0
PC           1.00 Hz
LB           0
GB           0
PC           1.40
  
```

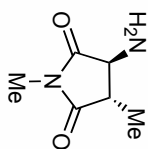

13

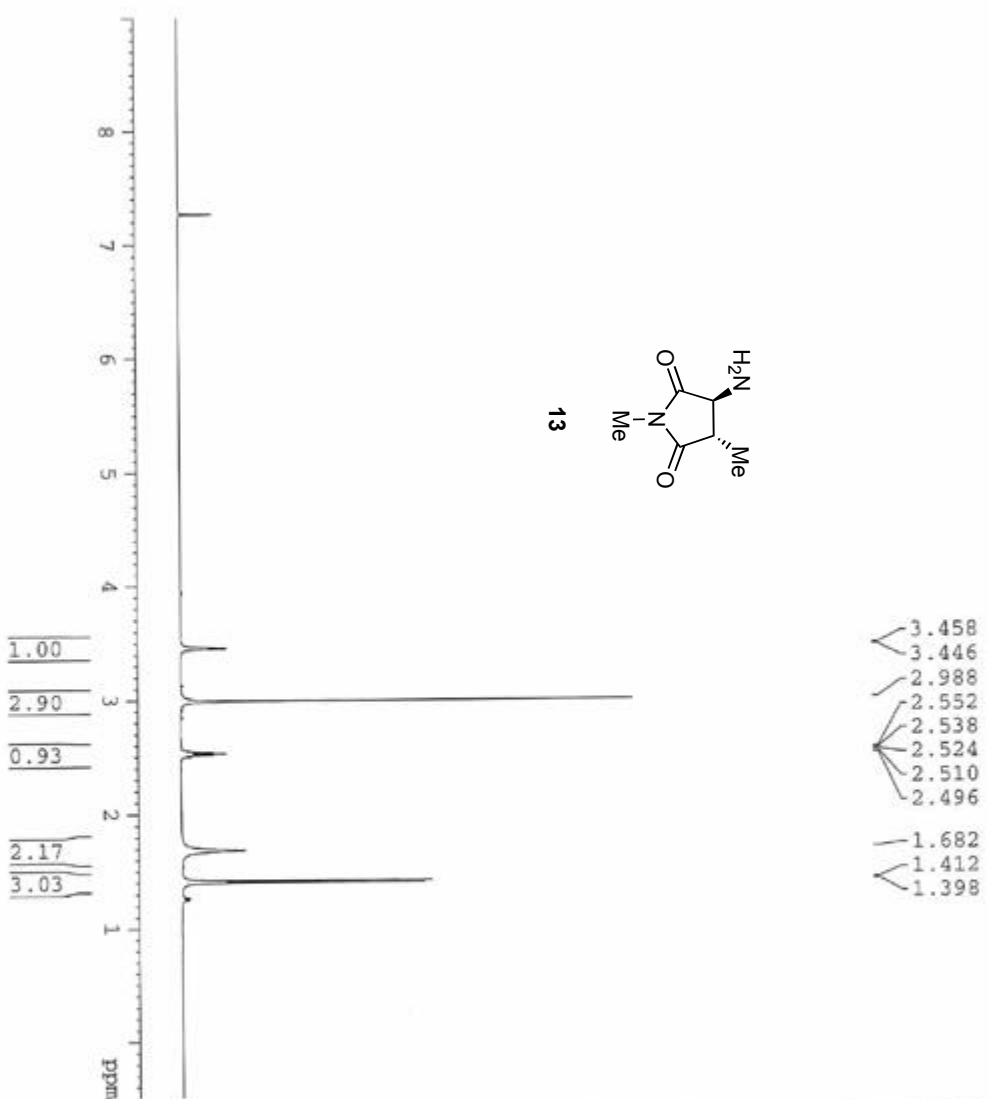

```

NAME          ul12247
EXPNO         1
PROCNO        1
Date_         20090920
Time         12.57
INSTRUM       5 mm BBOCP 1H/
PROBHD        spect
PULPROG       zg
TD            44998
SOLVENT       CDCl3
NS            8
DS            0
SWH           7500.000 Hz
FIDRES        0.166674 Hz
AQ            2.9999166 sec
RG            256
RO            66.667 usec
DE            71.41 usec
TE            294.1 K
T2           3.00000000 sec
T200          1

===== CHANNEL f1 =====
NUC1          1H
P1            12.00 usec
PL1           0.00 dB
PL1W          24.54113007 W
SFO1          500.1335009 MHz
SI            16384
SF           500.1300076 MHz
WDW           EM
SSB           0
LB            0.30 Hz
GB            0
PC            1.00
  
```



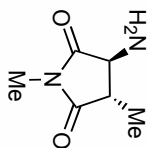

13

178.619  
177.827

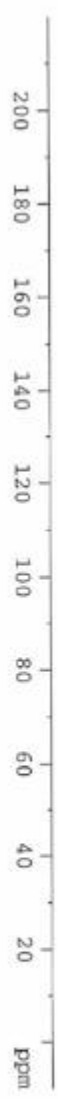

58.494  
44.559  
24.866  
13.869

```

NAME          RT12235
EXPNO         2
PROCNO        1
Date_         20090913
Time         13.30
INSTRUM       spect
PROBHD        5 mm BBOHD 1H/
PULPROG       zgpg30
TD            65536
SOLVENT       CDCl3
NS            180
DS            4
SWH           32894.738 Hz
FIDRES       0.500026 Hz
AQ           0.9999972 sec
RG           2050
DM           15.200 usec
DR           6.00 usec
TE           295.1 K
D1           4.00000000 sec
D11          0.03000000 sec
TD0          1
  
```

```

===== CHANNEL f1 =====
NUC1          13C
P1            8.00 usec
SFO1         125.7728799 MHz
===== CHANNEL f2 =====
CPDPRG2      waltz16
NUC2          1H
P2            0.00 usec
SFO2         500.1325006 MHz
===== CHANNEL f3 =====
CPDPRG3      waltz16
NUC3          13C
P3            0.00 usec
SFO3         125.7728799 MHz
===== CHANNEL f4 =====
CPDPRG4      waltz16
NUC4          1H
P4            0.00 usec
SFO4         500.1325006 MHz
===== CHANNEL f5 =====
CPDPRG5      waltz16
NUC5          13C
P5            0.00 usec
SFO5         125.7728799 MHz
===== CHANNEL f6 =====
CPDPRG6      waltz16
NUC6          1H
P6            0.00 usec
SFO6         500.1325006 MHz
===== CHANNEL f7 =====
CPDPRG7      waltz16
NUC7          13C
P7            0.00 usec
SFO7         125.7728799 MHz
===== CHANNEL f8 =====
CPDPRG8      waltz16
NUC8          1H
P8            0.00 usec
SFO8         500.1325006 MHz
===== CHANNEL f9 =====
CPDPRG9      waltz16
NUC9          13C
P9            0.00 usec
SFO9         125.7728799 MHz
===== CHANNEL f10 =====
CPDPRG10     waltz16
NUC10         1H
P10           0.00 usec
SFO10        500.1325006 MHz
===== CHANNEL f11 =====
CPDPRG11     waltz16
NUC11         13C
P11           0.00 usec
SFO11        125.7728799 MHz
===== CHANNEL f12 =====
CPDPRG12     waltz16
NUC12         1H
P12           0.00 usec
SFO12        500.1325006 MHz
===== CHANNEL f13 =====
CPDPRG13     waltz16
NUC13         13C
P13           0.00 usec
SFO13        125.7728799 MHz
===== CHANNEL f14 =====
CPDPRG14     waltz16
NUC14         1H
P14           0.00 usec
SFO14        500.1325006 MHz
===== CHANNEL f15 =====
CPDPRG15     waltz16
NUC15         13C
P15           0.00 usec
SFO15        125.7728799 MHz
===== CHANNEL f16 =====
CPDPRG16     waltz16
NUC16         1H
P16           0.00 usec
SFO16        500.1325006 MHz
===== CHANNEL f17 =====
CPDPRG17     waltz16
NUC17         13C
P17           0.00 usec
SFO17        125.7728799 MHz
===== CHANNEL f18 =====
CPDPRG18     waltz16
NUC18         1H
P18           0.00 usec
SFO18        500.1325006 MHz
===== CHANNEL f19 =====
CPDPRG19     waltz16
NUC19         13C
P19           0.00 usec
SFO19        125.7728799 MHz
===== CHANNEL f20 =====
CPDPRG20     waltz16
NUC20         1H
P20           0.00 usec
SFO20        500.1325006 MHz
===== CHANNEL f21 =====
CPDPRG21     waltz16
NUC21         13C
P21           0.00 usec
SFO21        125.7728799 MHz
===== CHANNEL f22 =====
CPDPRG22     waltz16
NUC22         1H
P22           0.00 usec
SFO22        500.1325006 MHz
===== CHANNEL f23 =====
CPDPRG23     waltz16
NUC23         13C
P23           0.00 usec
SFO23        125.7728799 MHz
===== CHANNEL f24 =====
CPDPRG24     waltz16
NUC24         1H
P24           0.00 usec
SFO24        500.1325006 MHz
===== CHANNEL f25 =====
CPDPRG25     waltz16
NUC25         13C
P25           0.00 usec
SFO25        125.7728799 MHz
===== CHANNEL f26 =====
CPDPRG26     waltz16
NUC26         1H
P26           0.00 usec
SFO26        500.1325006 MHz
===== CHANNEL f27 =====
CPDPRG27     waltz16
NUC27         13C
P27           0.00 usec
SFO27        125.7728799 MHz
===== CHANNEL f28 =====
CPDPRG28     waltz16
NUC28         1H
P28           0.00 usec
SFO28        500.1325006 MHz
===== CHANNEL f29 =====
CPDPRG29     waltz16
NUC29         13C
P29           0.00 usec
SFO29        125.7728799 MHz
===== CHANNEL f30 =====
CPDPRG30     waltz16
NUC30         1H
P30           0.00 usec
SFO30        500.1325006 MHz
===== CHANNEL f31 =====
CPDPRG31     waltz16
NUC31         13C
P31           0.00 usec
SFO31        125.7728799 MHz
===== CHANNEL f32 =====
CPDPRG32     waltz16
NUC32         1H
P32           0.00 usec
SFO32        500.1325006 MHz
===== CHANNEL f33 =====
CPDPRG33     waltz16
NUC33         13C
P33           0.00 usec
SFO33        125.7728799 MHz
===== CHANNEL f34 =====
CPDPRG34     waltz16
NUC34         1H
P34           0.00 usec
SFO34        500.1325006 MHz
===== CHANNEL f35 =====
CPDPRG35     waltz16
NUC35         13C
P35           0.00 usec
SFO35        125.7728799 MHz
===== CHANNEL f36 =====
CPDPRG36     waltz16
NUC36         1H
P36           0.00 usec
SFO36        500.1325006 MHz
===== CHANNEL f37 =====
CPDPRG37     waltz16
NUC37         13C
P37           0.00 usec
SFO37        125.7728799 MHz
===== CHANNEL f38 =====
CPDPRG38     waltz16
NUC38         1H
P38           0.00 usec
SFO38        500.1325006 MHz
===== CHANNEL f39 =====
CPDPRG39     waltz16
NUC39         13C
P39           0.00 usec
SFO39        125.7728799 MHz
===== CHANNEL f40 =====
CPDPRG40     waltz16
NUC40         1H
P40           0.00 usec
SFO40        500.1325006 MHz
===== CHANNEL f41 =====
CPDPRG41     waltz16
NUC41         13C
P41           0.00 usec
SFO41        125.7728799 MHz
===== CHANNEL f42 =====
CPDPRG42     waltz16
NUC42         1H
P42           0.00 usec
SFO42        500.1325006 MHz
===== CHANNEL f43 =====
CPDPRG43     waltz16
NUC43         13C
P43           0.00 usec
SFO43        125.7728799 MHz
===== CHANNEL f44 =====
CPDPRG44     waltz16
NUC44         1H
P44           0.00 usec
SFO44        500.1325006 MHz
===== CHANNEL f45 =====
CPDPRG45     waltz16
NUC45         13C
P45           0.00 usec
SFO45        125.7728799 MHz
===== CHANNEL f46 =====
CPDPRG46     waltz16
NUC46         1H
P46           0.00 usec
SFO46        500.1325006 MHz
===== CHANNEL f47 =====
CPDPRG47     waltz16
NUC47         13C
P47           0.00 usec
SFO47        125.7728799 MHz
===== CHANNEL f48 =====
CPDPRG48     waltz16
NUC48         1H
P48           0.00 usec
SFO48        500.1325006 MHz
===== CHANNEL f49 =====
CPDPRG49     waltz16
NUC49         13C
P49           0.00 usec
SFO49        125.7728799 MHz
===== CHANNEL f50 =====
CPDPRG50     waltz16
NUC50         1H
P50           0.00 usec
SFO50        500.1325006 MHz
  
```

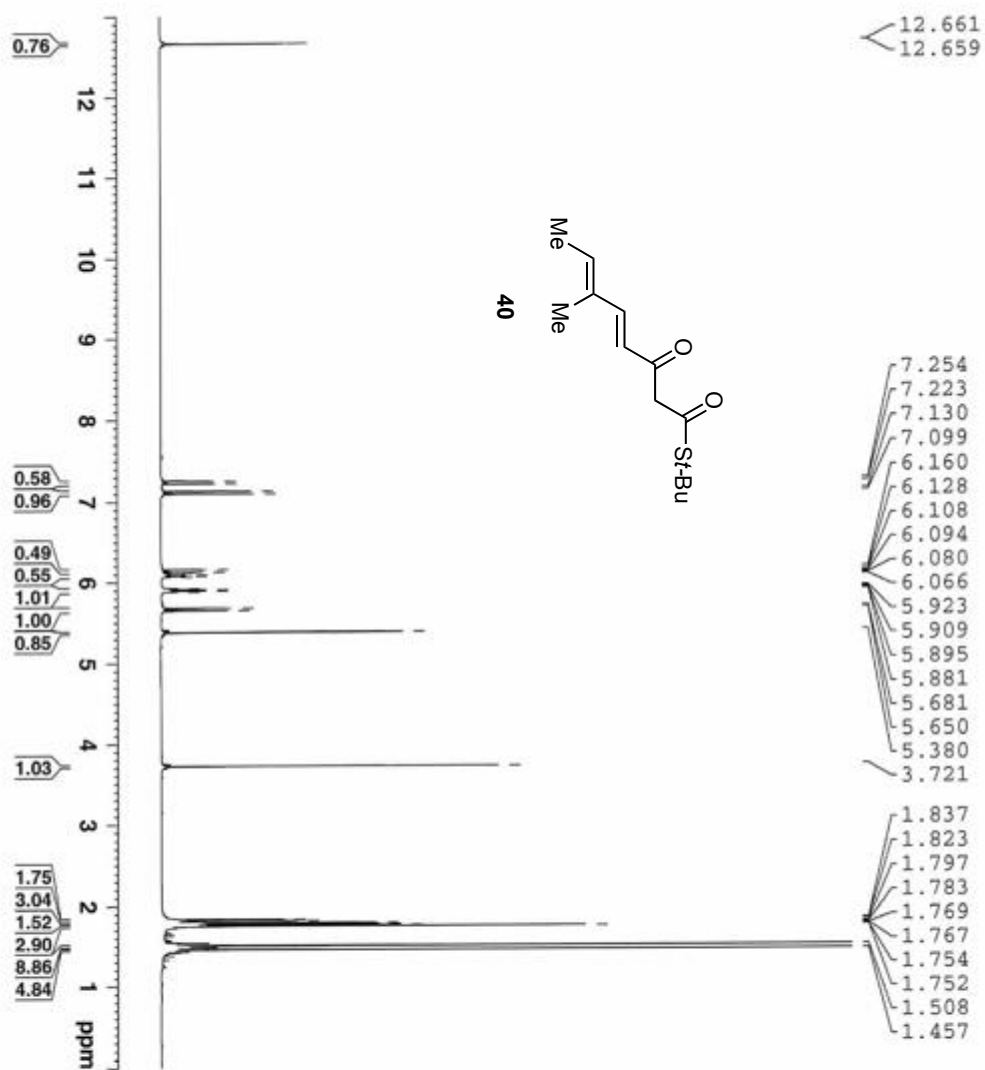

```

NAME          ac13010
EXPNO         1
PROCNO        1
Date_         20091124
Time         14.16
INSTRUM       spect
PROBHD        5 mm PABNP 1H/
PULPROG       zg
TD            44998
SOLVENT       CDCl3
NS            8
DS            0
SMB          7500.000 Hz
FIDRES       0.16674 Hz
AQ           2.999166 sec
RG           36
DM           66.667 usec
DE           71.43 usec
TE           294.7 K
D1           3.00000000 sec
TD0          1

***** CHANNEL f1 *****
NUC1          1H
P1           12.00 usec
PL           0.00 dB
PR1          24.54113007 V
SFO1         500.135009 MHz
SI           16384
SF           500.1300071 MHz
WDW          EM
SSB          0
LB           0.30 Hz
GB           0
PC           1.00
  
```

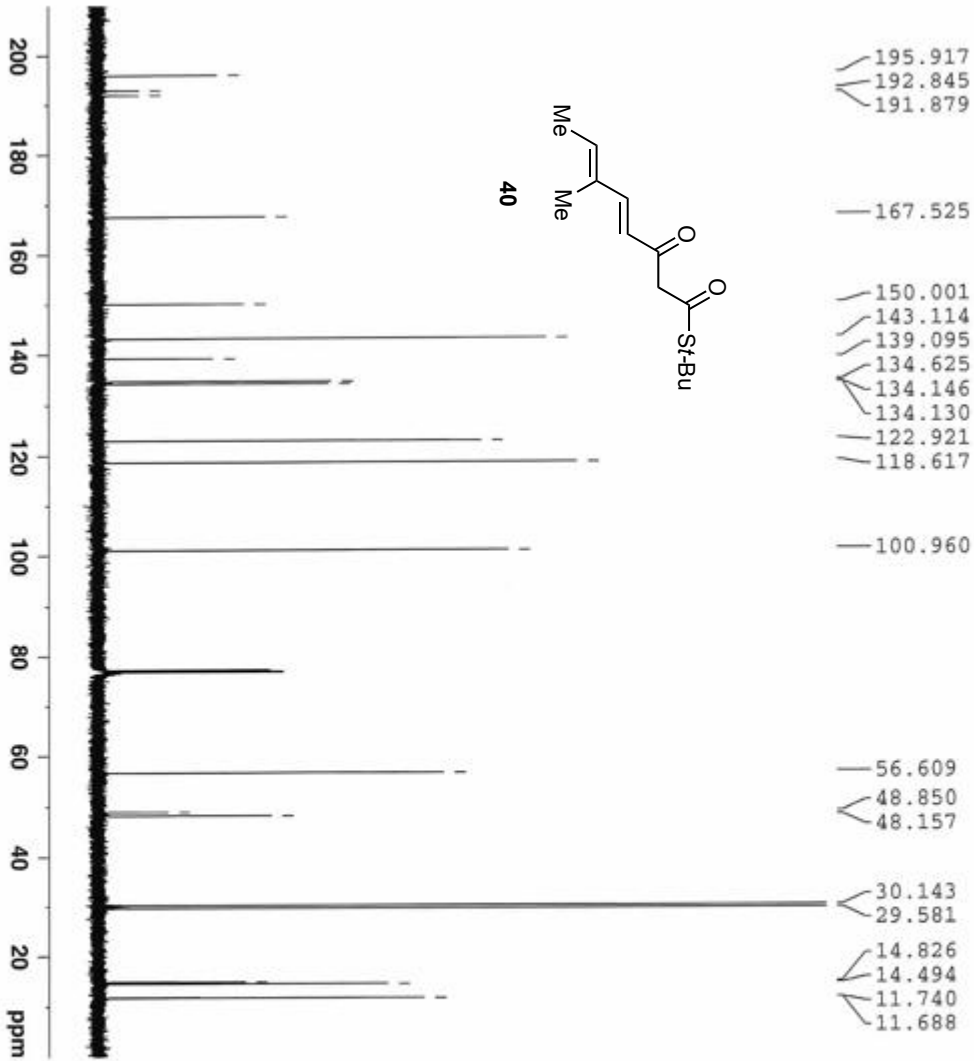

```

NAME          RL13010
EXPNO         2
PROCNO       1
DATE_        20091124
Time         14.23
INSTRUM      spect
PROBHD       5 mm PAQNP 1H/
PULPROG      zgpgp
TD           65786
SOLVENT      CDCl3
NS           64
DS           4
SMH          32894.738 Hz
FIDRES       0.500026 Hz
AQ           0.999972 sec
RG           2050
DM          15.200 usec
DE           6.00 usec
TE           295.2 K
D1           4.00000000 sec
D11          0.03000000 sec
TD0          1

===== CHANNEL f1 =====
NUC1         13C
P1           8.00 usec
PL1          1.00 dB
PL1W         72.42802429 W
SFO1         125.7728799 MHz

===== CHANNEL f2 =====
CPDPRG2     waltz16
NUC2         1H
PCPD2       80.00 usec
PL2          0.00 dB
PL3          15.50 dB
PL13         17.00 dB
PL2W         24.54113007 W
PL13W        0.54940748 W
SFO2         500.1325006 MHz
SI           131072
SF           125.7577943 MHz
WDW          EM
SSB          0
LB           0.30 Hz
GB           0
PC           1.40
  
```

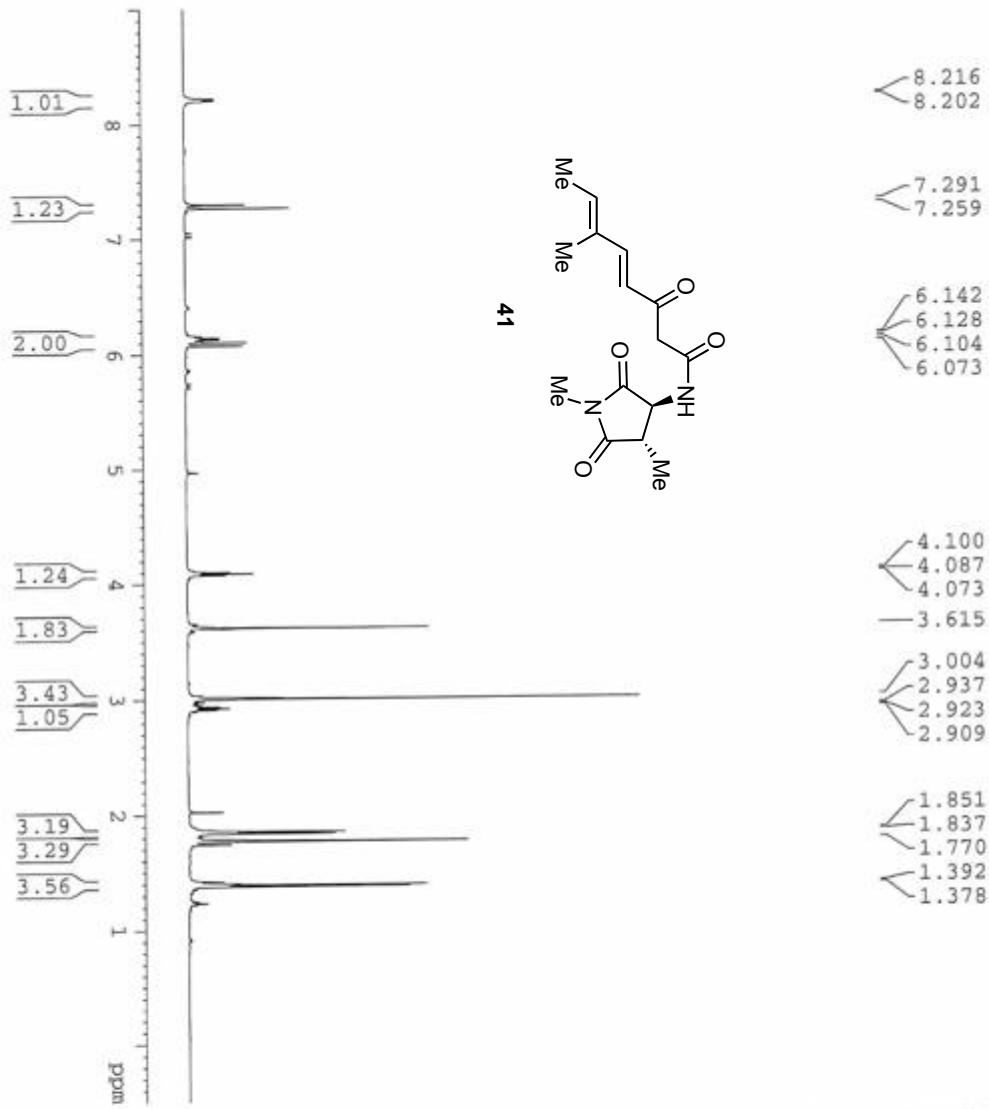

```

NAME          s-131027
EXPNO         1
PROCNO       1
Date_        20091203
Time         18.07
INSTRUM      spect
PROBHD       5 mm PAQNP 1H/
PULPROG      zgpg30
TD           44998
SOLVENT      CDCl3
NS           8
DS           0
SWH          7500.000 Hz
FIDRES       0.166674 Hz
AQ           2.9999166 sec
RG           71.8
IW          66.667 us
DE          71.43 us
TE           294.6 K
D1           1.00000000 sec
TD0          1

===== CHANNEL f1 =====
NUC1          1H
P1           13.00 us
PL1          0.00 dB
PL1W         24.54113007 W
SFO1         500.1315009 MHz
SI           16384
SF           500.1300086 MHz
WDW          EM
SSB          0
GB           0
PC           1.00
  
```

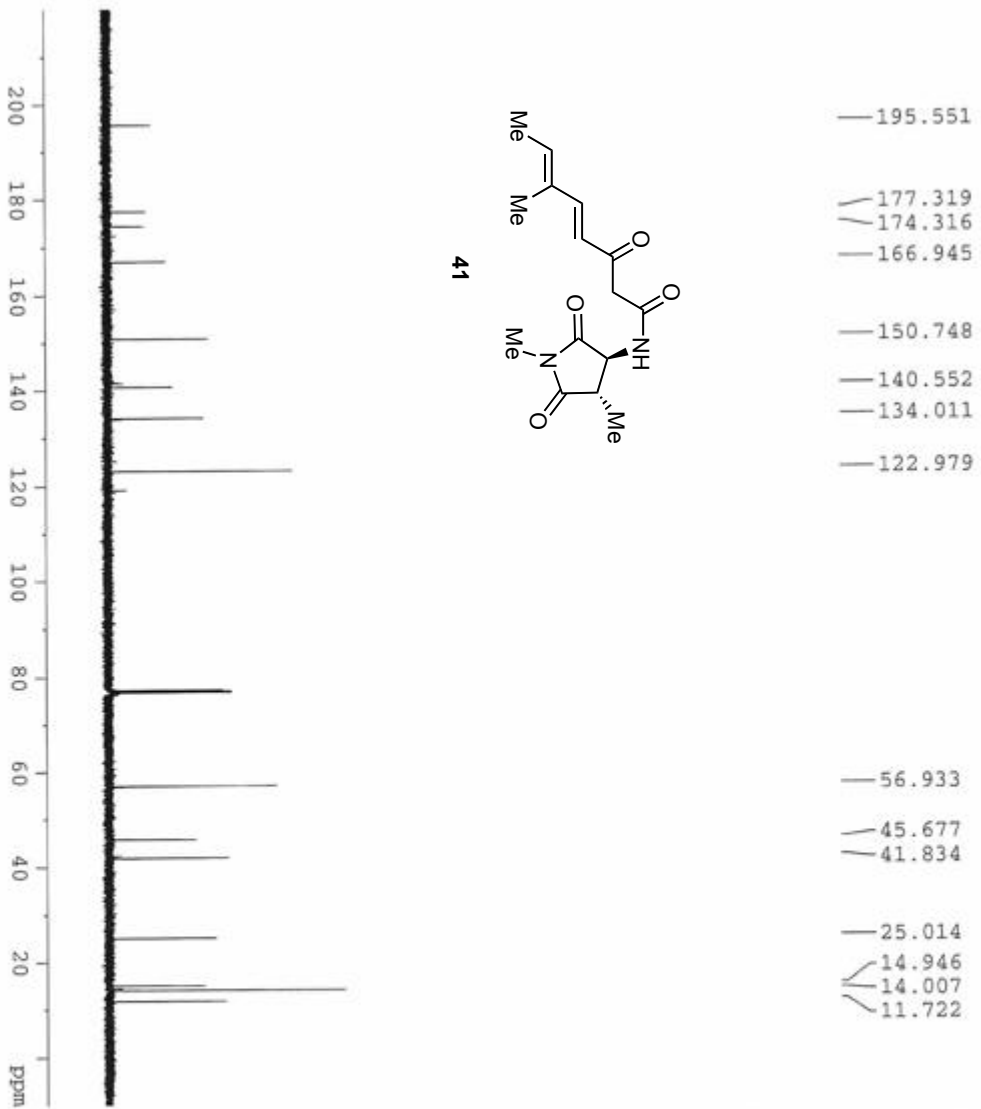

41

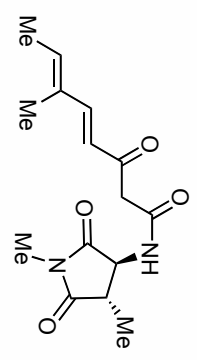

```

NAME          ac13027
EXPNO         2
PROCNO       1
Date_         20091203
Time         18.15
INSTRUM      spect
PROBHD       5 mm PQAQNP 1H/
PULPROG      zgpg
TD           65786
SOLVENT      CDCl3
NS           64
DS           4
SWH          32894.738 Hz
FIDRES      0.500026 Hz
AQ          0.9999972 sec
RG          2050
BW          15.200 us
DE          6.00 us
TE          295.1 K
D1          4.00000000 sec
D11         0.03000000 sec
TDO         1

===== CHANNEL f1 =====
NUC1         13C
P1           0.00 us
PL1         1.00 dB
ELW         72.42802829 W
SFO1        125.7728799 MHz

===== CHANNEL f2 =====
CPDPRG2     waltz16
NUC2         1H
PCPD2       80.00 us
PL2         0.00 dB
PL12        16.50 dB
PL13        17.00 dB
PL14        24.54113007 W
PL15W       0.54340748 W
PL16W       0.48965994 W
SFO2        500.1325006 MHz
SI          131072
SF          125.7577967 MHz
WDW          EM
SSB          0
LB          0.30 Hz
GB          0
PC          1.40

```

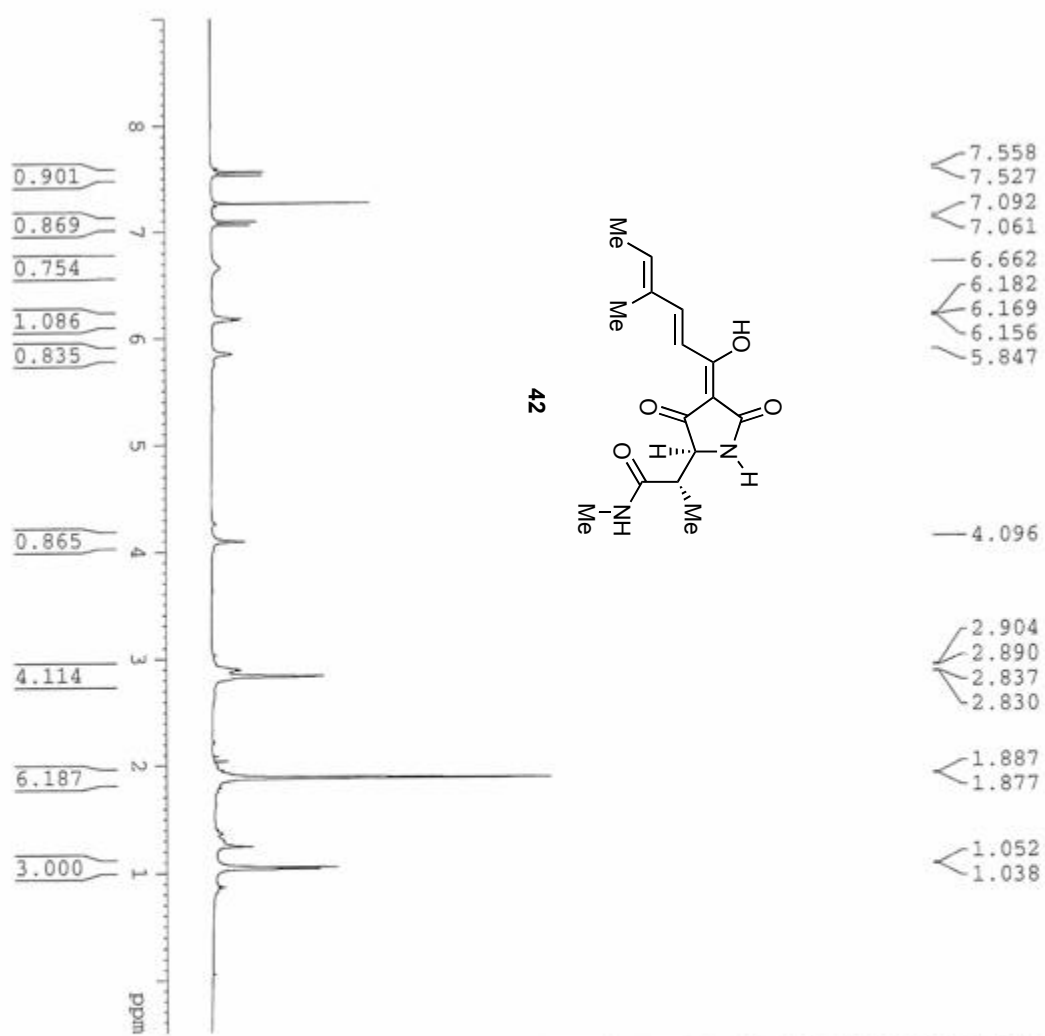

- 7.558
- 7.527
- 7.092
- 7.061
- 6.662
- 6.182
- 6.169
- 6.156
- 5.847
- 4.096
- 2.904
- 2.890
- 2.837
- 2.830
- 1.887
- 1.877
- 1.052
- 1.038

```

NAME          FT1228
EXPNO         1
PROCNO        1
Date_         20101125
Time          18.18.59
INSTRUM       spect
PROBHD        5 mm QNP 1H
PULPROG       zgpg30
TD            45044
SOLVENT       Acetone
NS            8
DS            0
SWH           7507.507 Hz
FIDRES       0.166671 Hz
AQ           2.9999804 sec
RG           128
DE           66.600 uS/ac
DS           4.50 uS/ac
TE           300.0 K
D1           3.00000000 sec

***** CHANNEL f1 *****
NUC1          1H
P1            9.00 uS/ac
PL1           0.00 dB
SFO1         500.132809 MHz
SI           32
SF           500.1300125 MHz
VNUF         0
SNUF         0
L3           0.30 Hz
GB           0
PC           1.00

```

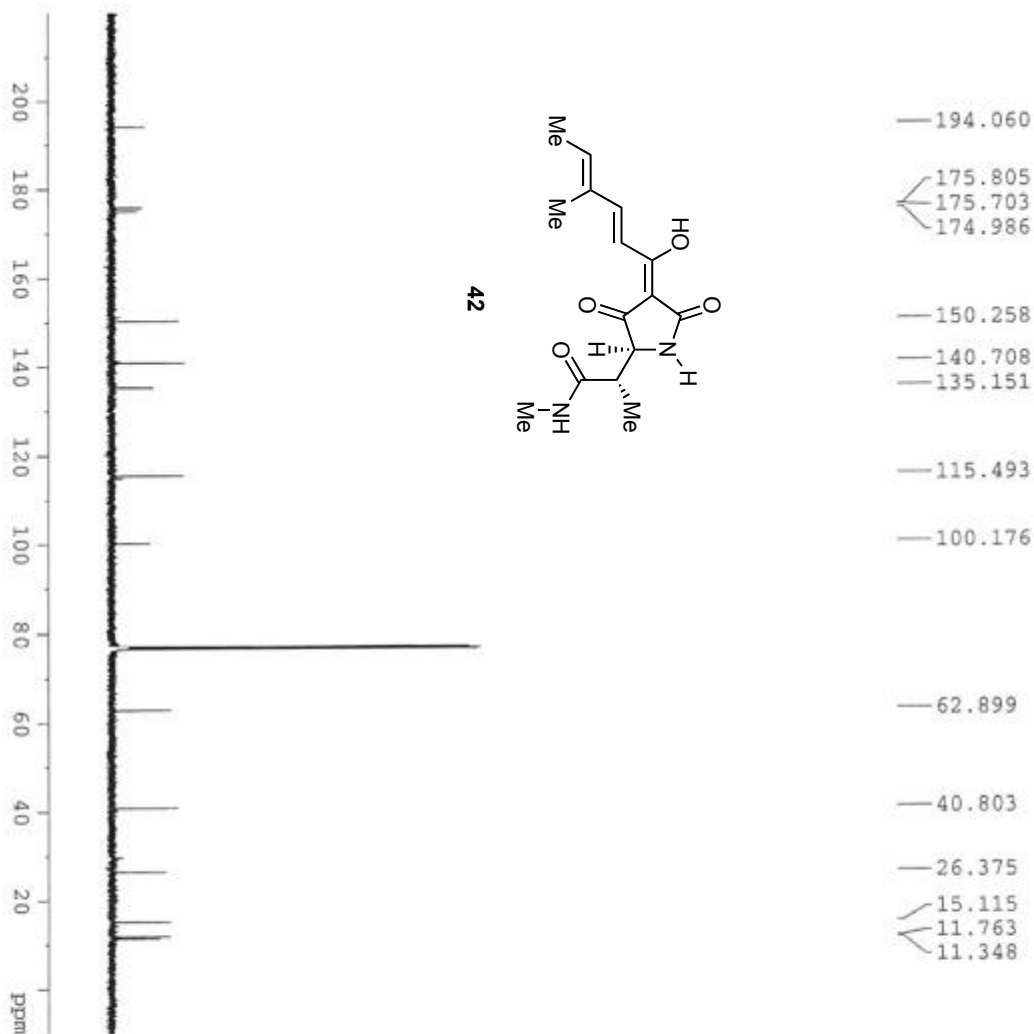

```

NAME          4113228
EXPNO         81
PROCNO       1
Date_         20101125
Time         19.16
INSTRUM      spect
PROBHD       5 mm QNP 1H
PULPROG      zgpg30
TD           65536
SOLVENT      CDCl3
NS           280
DS           4
SWH          30301.011 Hz
FIDRES      0.360013 Hz
AQ          0.9999810 sec
RG          16384
DM          16.900 usec
DE          7.500 usec
TE          300.2 K
D1          1.00000000 sec
d11         0.03000000 sec
----- CHANNEL f1 -----
NUC1         13C
P1          8.00 usec
PL1         1.00 dB
SFO1        125.7715724 MHz
----- CHANNEL f2 -----
CPDPRG2     waltz16
NUC2         1H
PCPD2       90.00 usec
PL2         120.00 dB
PL12        20.00 dB
SFO2        500.1318000 MHz
SI          12768
SF          125.7577912 MHz
WDM         EX
SSB         0
LB          1.00 Hz
GB          0
RC          1.40

```

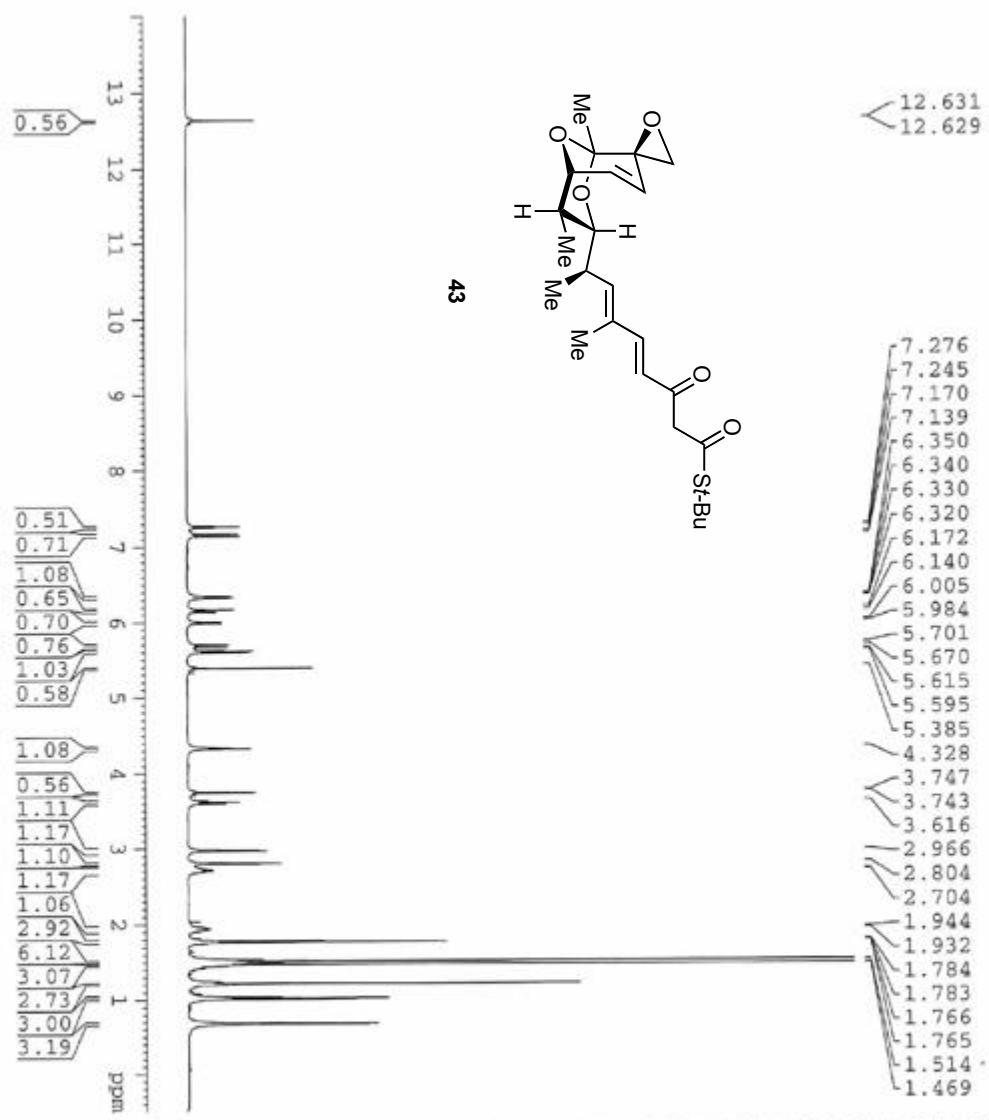

12.631  
12.629

7.276  
7.245  
7.170  
7.139  
6.350  
6.340  
6.330  
6.320  
6.172  
6.140  
6.005  
5.984  
5.701  
5.670  
5.615  
5.595  
5.385  
4.328  
3.747  
3.743  
3.616  
2.966  
2.804  
2.704  
1.944  
1.932  
1.784  
1.783  
1.766  
1.765  
1.514  
1.469

```

NAME          rt13008
EXPNO         1
PROCNO        1
Date_         20091122
Time          14.41
INSTRUM       spect
PROBHD        5 mm PABCP 1H/
PULPROG       zg
TD            44998
SOLVENT      CDCl3
NS           8
DS           0
SFO1         7500.000 Hz
FIDRES       0.166674 Hz
AQ           2.9999166 sec
RG           45.2
KW           66.061 usec
DE           71.43 usec
TE           294.6 K
DQ           3.000000000 sec
TD0          1

----- CHANNEL f1 -----
NUC1          1H
P1           12.00 usec
PL           0.00 dB
PC1W         24.54113007 W
SFO1         500.1335069 MHz
SI           16384
SF           500.1300076 MHz
WDW          EM
SSB          0
GB           0
PC           0.30 Hz
GB           0
PC           1.00
  
```



- 195.939
- 192.940
- 191.999
- 167.338
- 150.131
- 144.479
- 143.291
- 140.293
- 133.878
- 133.759
- 132.948
- 132.914
- 130.525
- 130.482
- 123.827
- 119.324
- 101.050
- 98.825
- 98.769
- 76.196
- 76.089
- 71.428
- 71.379
- 56.225
- 55.021
- 54.970
- 50.512
- 50.495
- 48.934
- 48.238
- 35.061
- 34.968
- 33.884
- 33.652
- 30.165
- 29.615
- 22.183
- 17.243
- 17.064

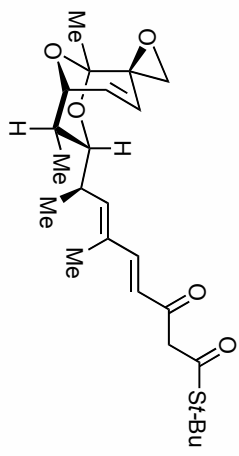

43

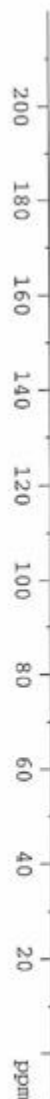

```

NAME          ac13008
EXPNO         2
PROCNO        1
Date_         20091122
Time         14.56
INSTRUM       spect
PROBHD        5 mm PACTAR 1H/
PULPROG       zgpg30
TD            65786
SOLVENT       CDCl3
NS            200
DS            4
SWH           32894.718 Hz
FIDRES        0.500026 Hz
AQ            0.9999872 sec
RG            2050
EW           15.200 usec
EK            6.00 usec
TE            295.4 K
D1            4.00000000 sec
D11           0.03000000 sec
TD0           1

===== CHANNEL f1 =====
NUC1          13C
P1            8.00 usec
PL1           1.00 dB
P1M1          72.4282429 Hz
SFO1          125.7728799 MHz

===== CHANNEL f2 =====
CPDPRG2       waltz16
NUC2          1H
PCPD2         80.00 usec
P2           0.00 dB
PL2           16.50 dB
P2M2          24.54113907 W
PL3           17.00 dB
P3M3          0.54940748 W
PL12W         0.48965994 W
SFO2          500.1325006 MHz
SI            131072
SF            125.7577933 MHz
RGW           0
SSB           0
LBR           0
GB            0
PC            1.40
  
```

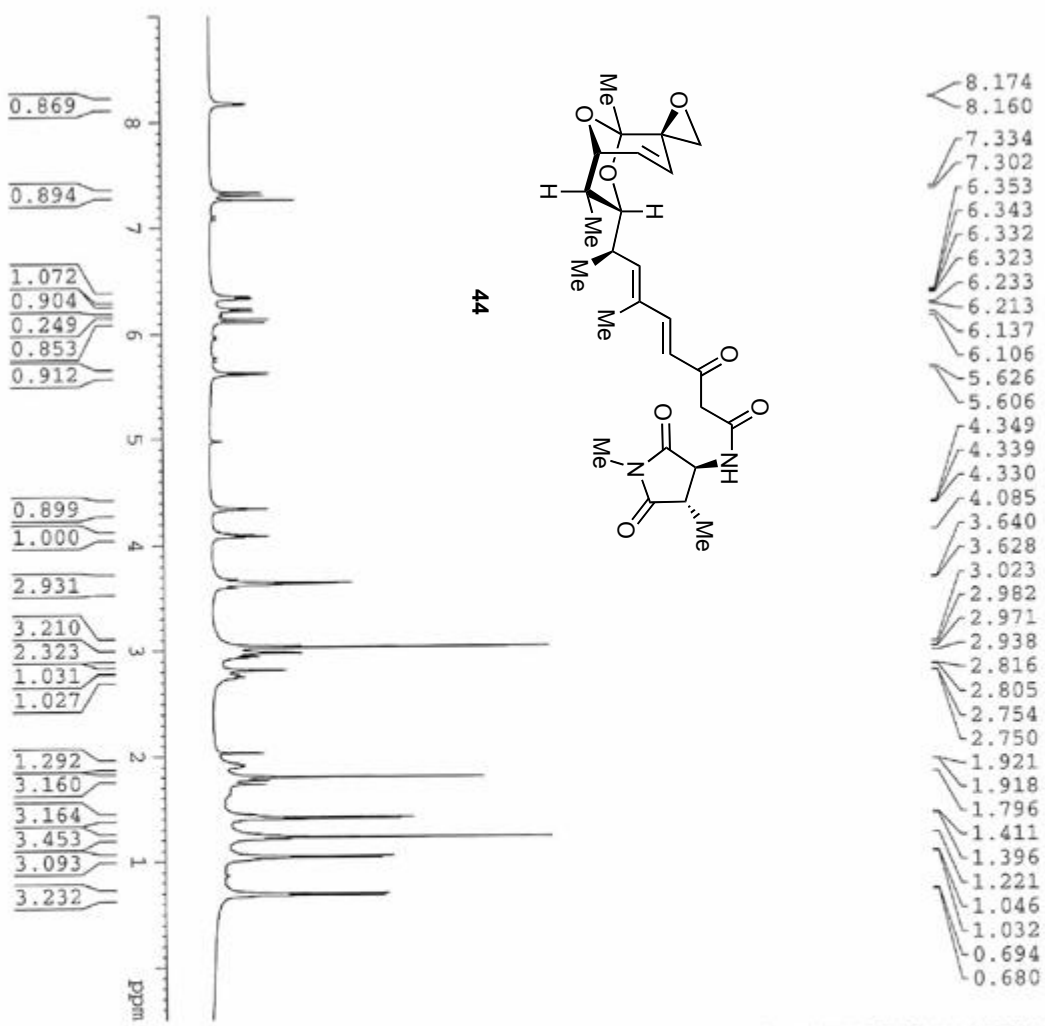

44

- 8.174
- 8.160
- 7.334
- 7.302
- 6.353
- 6.343
- 6.332
- 6.323
- 6.233
- 6.213
- 6.137
- 6.106
- 5.626
- 5.606
- 4.349
- 4.339
- 4.330
- 4.085
- 3.640
- 3.628
- 3.023
- 2.982
- 2.971
- 2.938
- 2.816
- 2.805
- 2.754
- 2.750
- 1.921
- 1.918
- 1.796
- 1.411
- 1.396
- 1.221
- 1.046
- 1.032
- 0.694
- 0.680

```

NAME          RL13049
EXPNO         21
PROCNO        1
Date_         20091230
Time         12.43
INSTRUM       spect
PROBHD        5 mm QNP 1H
PULPROG       zgpg30
TD            48076
SOLVENT       Acetone
NS           0
DS           0
SWH           7507.507 Hz
FIDRES       0.156159 Hz
AQ           3.2019117 sec
RG           64
WDW           EM
SSB           0
GB           0
PC           1.00
===== CHANNEL f1 =====
NUC1          1H
P1           9.00 usec
PL           0.00 dB
SFO1         500.1315009 MHz
SI           65516
SF           500.1300126 MHz
WDW         EM
SSB         0
GB         0
PC         0.33 usec
  
```

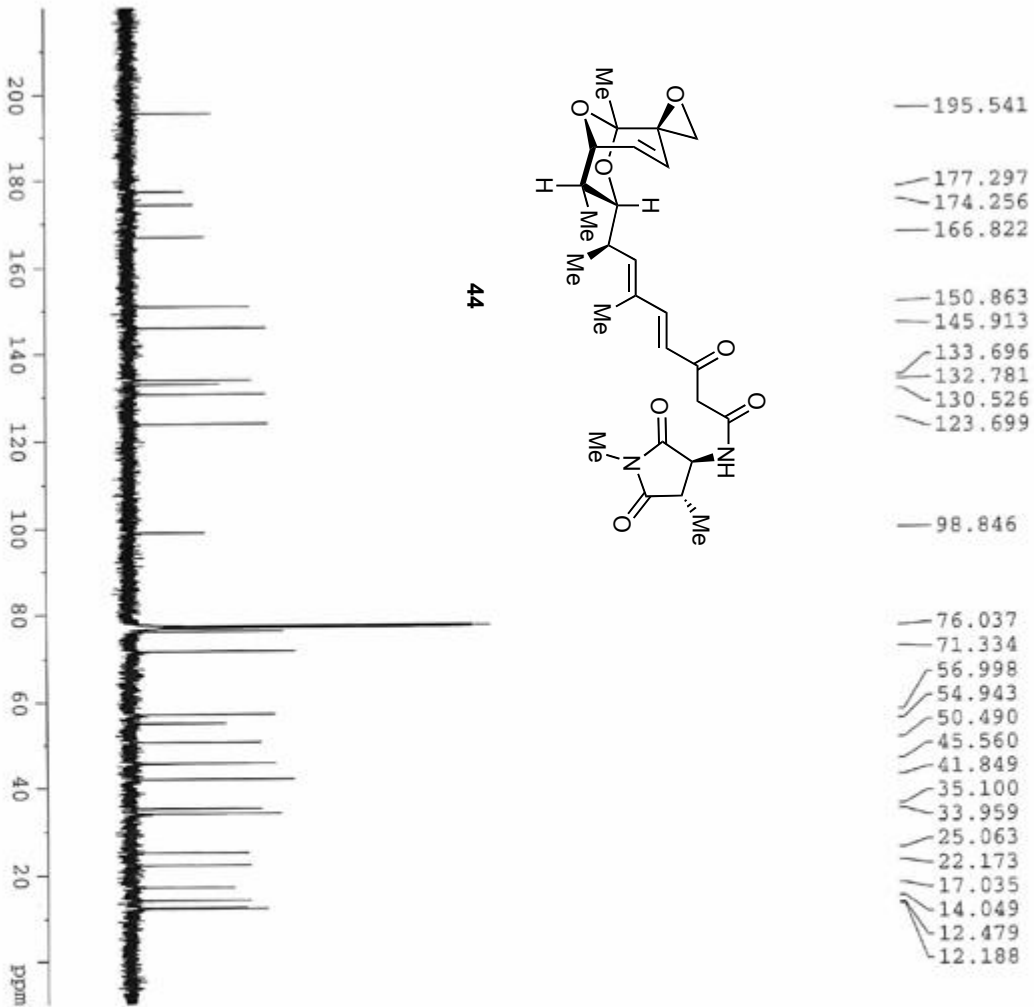

44

- 195.541
- 177.297
- 174.256
- 166.822
- 150.863
- 145.913
- 133.696
- 132.781
- 130.526
- 123.699
- 98.846
- 76.037
- 71.334
- 56.998
- 54.943
- 50.490
- 45.560
- 41.849
- 35.100
- 33.959
- 25.063
- 22.173
- 17.035
- 14.049
- 12.479
- 12.188

```

NAME          #C13049
EXPNO         2
PROCNO       1
Date_        20091210
Time         12.26
INSTRUM     spect
PROBHD      5 mm QNP 1H
PULPROG     zgpg
TD          65536
SOLVENT     CDCl3
NS          161
DS          0
SWH         32679.739 Hz
F2RES      0.330027 Hz
AQ         0.999298 sec
RG         13.004
DM         13.004 usec
DE         7.50 usec
TE         300.0 K
D1         4.00000000 sec
d11        0.03000000 sec

----- CHANNEL f1 -----
NUC1        13C
P1          8.00 usec
PL1         3.00 dB
SFO1        125.772829 MHz

----- CHANNEL f2 -----
C1P1PRG2    waltz16
NUC2         1H
PCPD2       90.00 usec
PL2         120.00 dB
PL12        20.00 dB
SFO2        500.138000 MHz
SI          32768
SP         125.757790 MHz
VPR         EX
SSB         0
L8          1.00 Hz
GB          1.40
PC          1.40

```

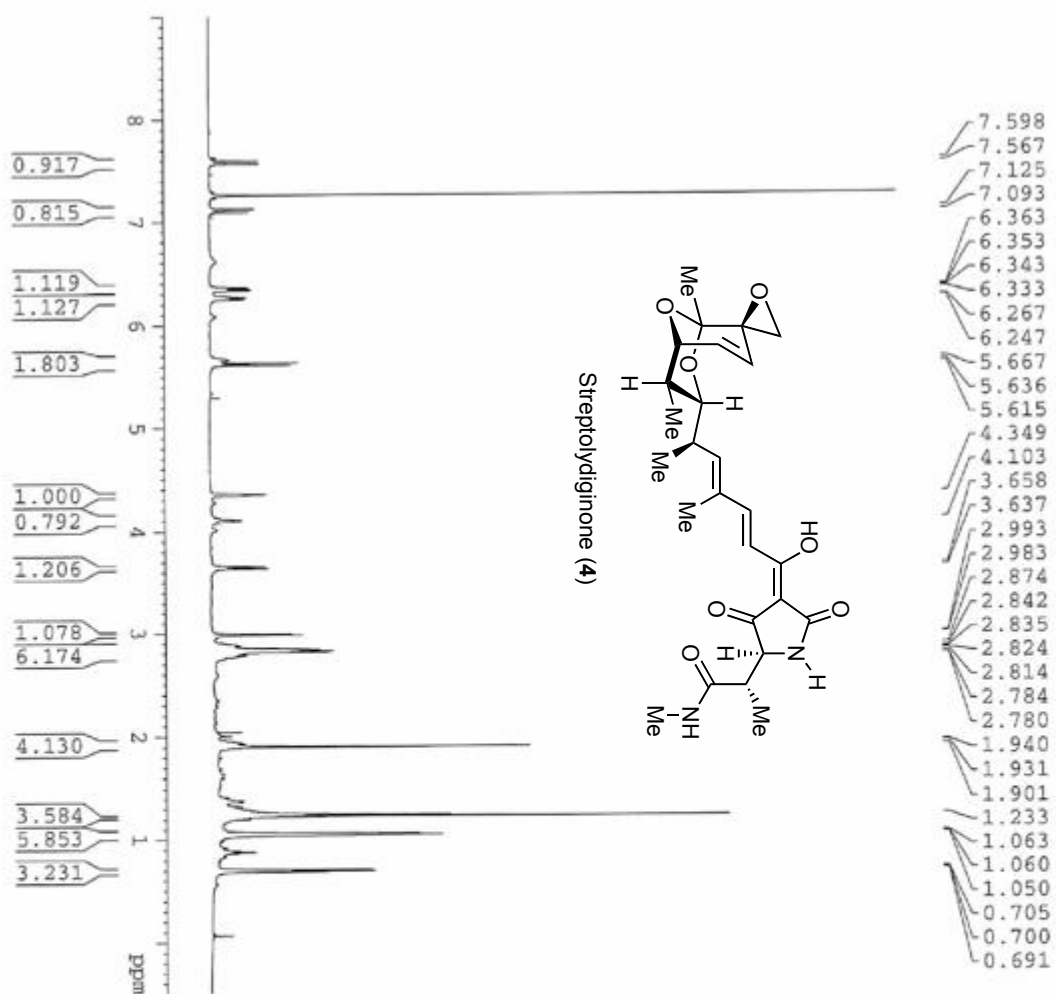

```

NAME          aglycone
EXPNO         1
PROCNO       1
Date_         20100204
Time         15.39
INSTRUM      spect
PROBHD       5 mm QNP 1H
PULPROG      zgpg30
TD           45044
SOLVENT      CDCl3
NS           142
DS           0
SWH          7507.507 Hz
FIDRES       0.166671 Hz
AQ           2.9999004 sec
RG           128
WDW          EM
DK           66.680 usec
DC           4.50 usec
TE           300.0 K
D1           3.00000000 sec

***** CHANNEL f1 *****
NUC1          13C
P1           9.00 usec
PL           0.00 dB
SFO1         500.135009 MHz
SI           65536
SF           500.1300135 MHz
WDW          EM
SSM          0
LB           0.30 Hz
GB           0
PC           1.00

```

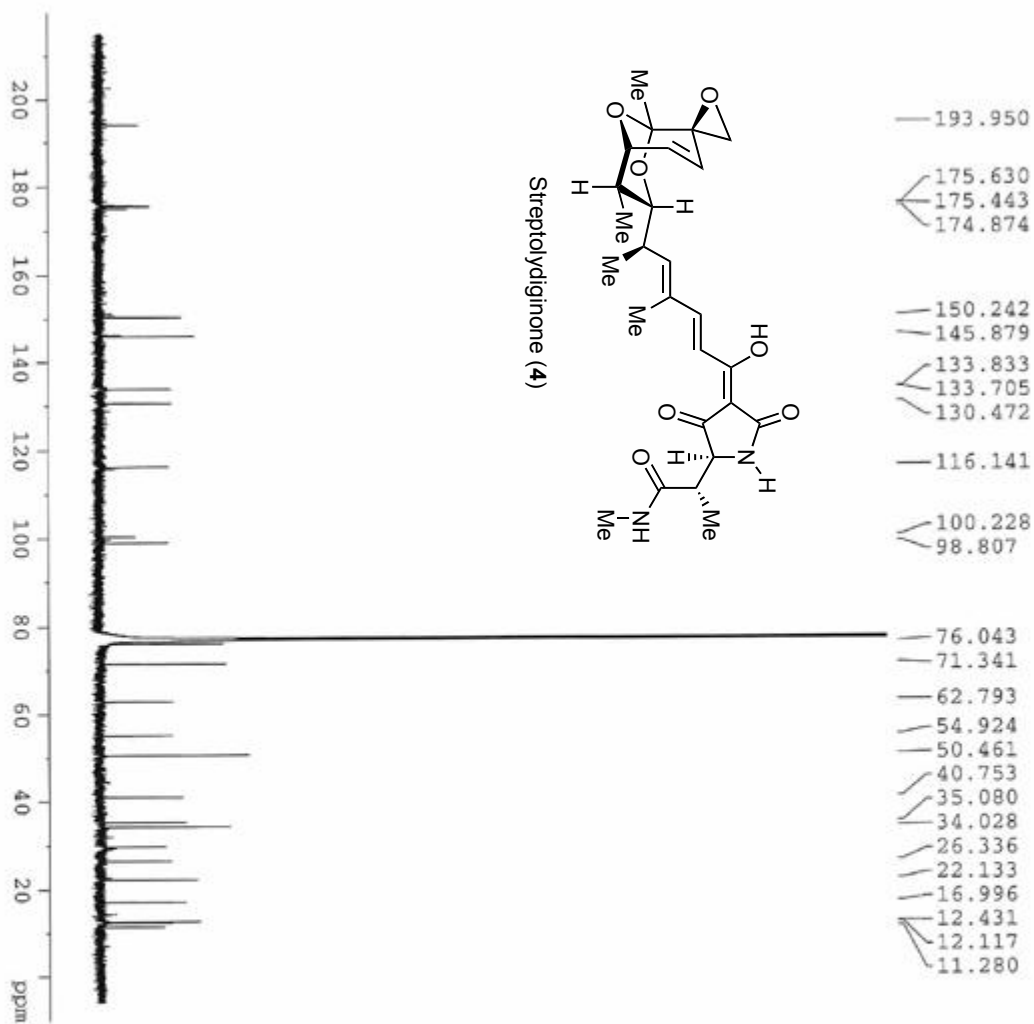

```

NAME          40lycdicet13C
EXPNO         1
PROCNO        1
Date_         20100207
Time         21.16
INSTRUM       spect
PROBHD        5 mm QNP 1H
PULPROG       zgpg30
TD            55552
SOLVENT       CDCl3
NS           10624
DS           4
SWH          27777.777 Hz
FIDRES       0.500012 Hz
AQ          0.9999860 sec
RG          16384
BW          18.000 usec
DE          7.50 usec
TE          300.0 K
D1          1.00000000 sec
d11         0.03000000 sec

----- CHANNEL f1 -----
NUC1         13C
P1          0.00 usec
PL1         3.00 dB
SFO1        125.7709436 MHz

----- CHANNEL f2 -----
CPDPRG2      waltz16
NUC2         1H
PCPD2       90.00 usec
PL2         120.00 dB
PL12        20.00 dB
SFO2        500.1338000 MHz
SI          32768
SF          125.7578019 MHz
WDW         EM
SSB         0
LB          1.00 Hz
GB          0
PC          1.40
  
```

7.847  
7.838  
7.687  
7.656  
7.031  
7.000  
6.413  
6.404  
6.394  
6.384  
6.077  
5.770  
5.750  
5.631  
5.611  
4.343  
4.334  
4.325  
3.592  
3.571  
2.951  
2.941  
2.898  
2.888  
2.767  
2.751  
2.735  
2.666  
2.652  
2.581  
2.573  
1.781  
1.077  
0.987  
0.974  
0.795  
0.781  
0.663  
0.649

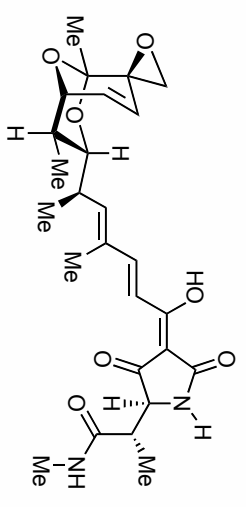

Streptolydiginone (4) Na salt

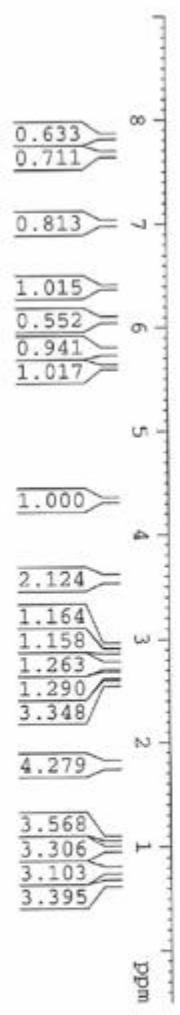

```

NAME          enjlycombesalt
EXPNO         5
PROCNO       1
Date_         20100215
Time         18.18
INSTRUM      spect
PROBHD       5 mm QNP 1H
PULPROG      zgpg30
TD           65536
SOLVENT      DMSO
NS           64
DS           0
SWH          7507.507 Hz
FIDRES      0.16671 Hz
AQ          2.9398804 sec
RG           66.612
DM           66.612
DE           4.50
DS           100.0
TE           300.2 K
D1          3.00000000 sec
===== CHANNEL f1 =====
NUC1         1H
P1           9.00 usec
PL1          0.00 dB
SFO1         500.1375009 MHz
SI           65536
SF           500.1300054 MHz
WDW          EM
SSB          0
GB           0.30 Hz
CB           0
PC           1.00

```

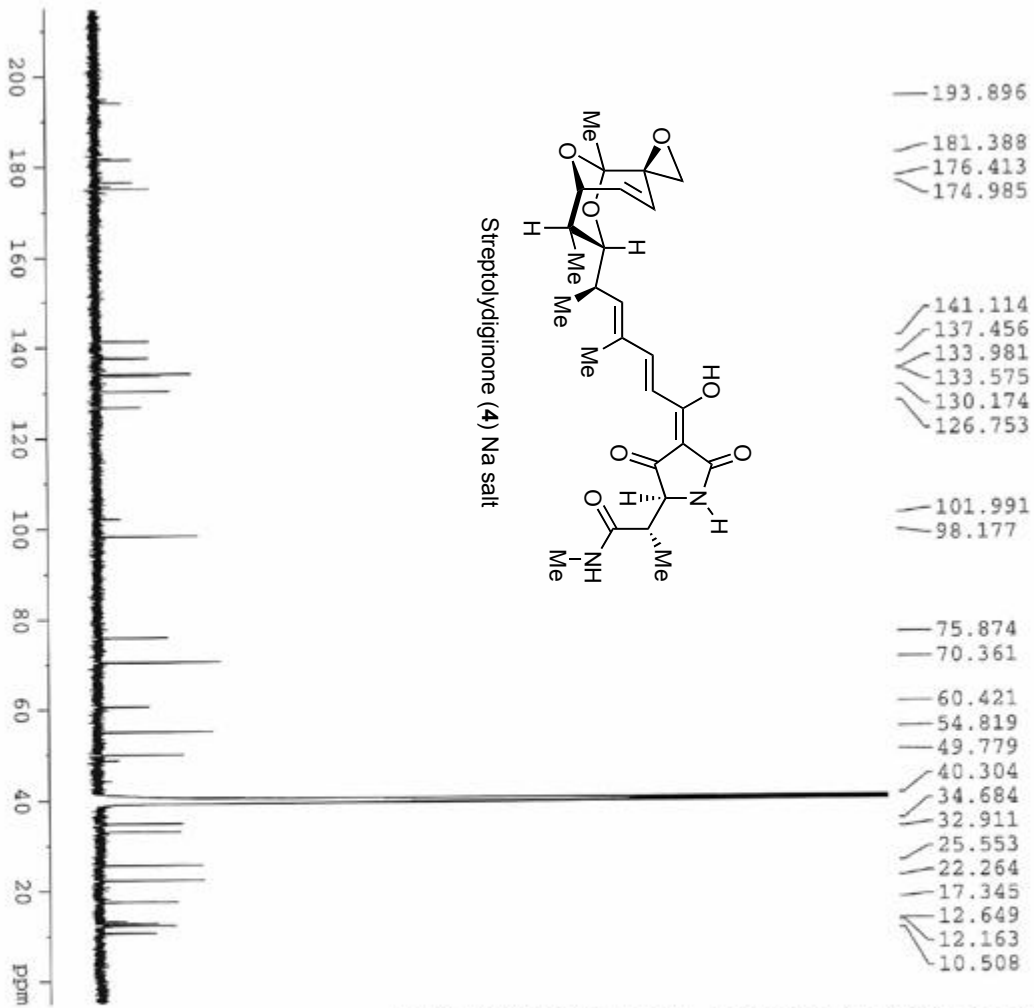

- 193.896
- 181.388
- 176.413
- 174.985
- 141.114
- 137.456
- 133.981
- 133.575
- 130.174
- 126.753
- 101.991
- 98.177
- 75.874
- 70.361
- 60.421
- 54.819
- 49.779
- 40.304
- 34.684
- 32.911
- 25.553
- 22.264
- 17.345
- 12.649
- 12.163
- 10.508

```

NAME          aglycoradfasalt
EXPNO         1
PROCNO        1
Date_         20100216
Time         21.09
INSTRUM       spect
PROBHD        5 mm QNP 1H
PULPROG       zgpg30
TD            55552
SOLVENT       CDCl3
NS            32752
DS            4
SFO1         377.777 MHz
FIDRES       0.580032 Hz
AQ           0.3929860 sec
RG           16384
DE           18.000 usec
TE           300.2 K
D1           0.3800001 sec
d11         0.01000000 sec
d111

===== CHANNEL f1 =====
NUC1          13C
P1            4.00 usec
PL1          3.00 dB
SFO1         125.7709436 MHz

===== CHANNEL f2 =====
NAME          waltz16
EXPNO         1
PROCNO        1
Date_         20100216
Time         21.09
INSTRUM       spect
PROBHD        5 mm QNP 1H
PULPROG       zgpg30
TD            55552
SOLVENT       CDCl3
NS            32752
DS            4
SFO1         377.777 MHz
FIDRES       0.580032 Hz
AQ           0.3929860 sec
RG           16384
DE           18.000 usec
TE           300.2 K
D1           0.3800001 sec
d11         0.01000000 sec
d111

===== CHANNEL f2 =====
NAME          waltz16
EXPNO         1
PROCNO        1
Date_         20100216
Time         21.09
INSTRUM       spect
PROBHD        5 mm QNP 1H
PULPROG       zgpg30
TD            55552
SOLVENT       CDCl3
NS            32752
DS            4
SFO1         377.777 MHz
FIDRES       0.580032 Hz
AQ           0.3929860 sec
RG           16384
DE           18.000 usec
TE           300.2 K
D1           0.3800001 sec
d11         0.01000000 sec
d111

===== CHANNEL f2 =====
NAME          waltz16
EXPNO         1
PROCNO        1
Date_         20100216
Time         21.09
INSTRUM       spect
PROBHD        5 mm QNP 1H
PULPROG       zgpg30
TD            55552
SOLVENT       CDCl3
NS            32752
DS            4
SFO1         377.777 MHz
FIDRES       0.580032 Hz
AQ           0.3929860 sec
RG           16384
DE           18.000 usec
TE           300.2 K
D1           0.3800001 sec
d11         0.01000000 sec
d111
  
```

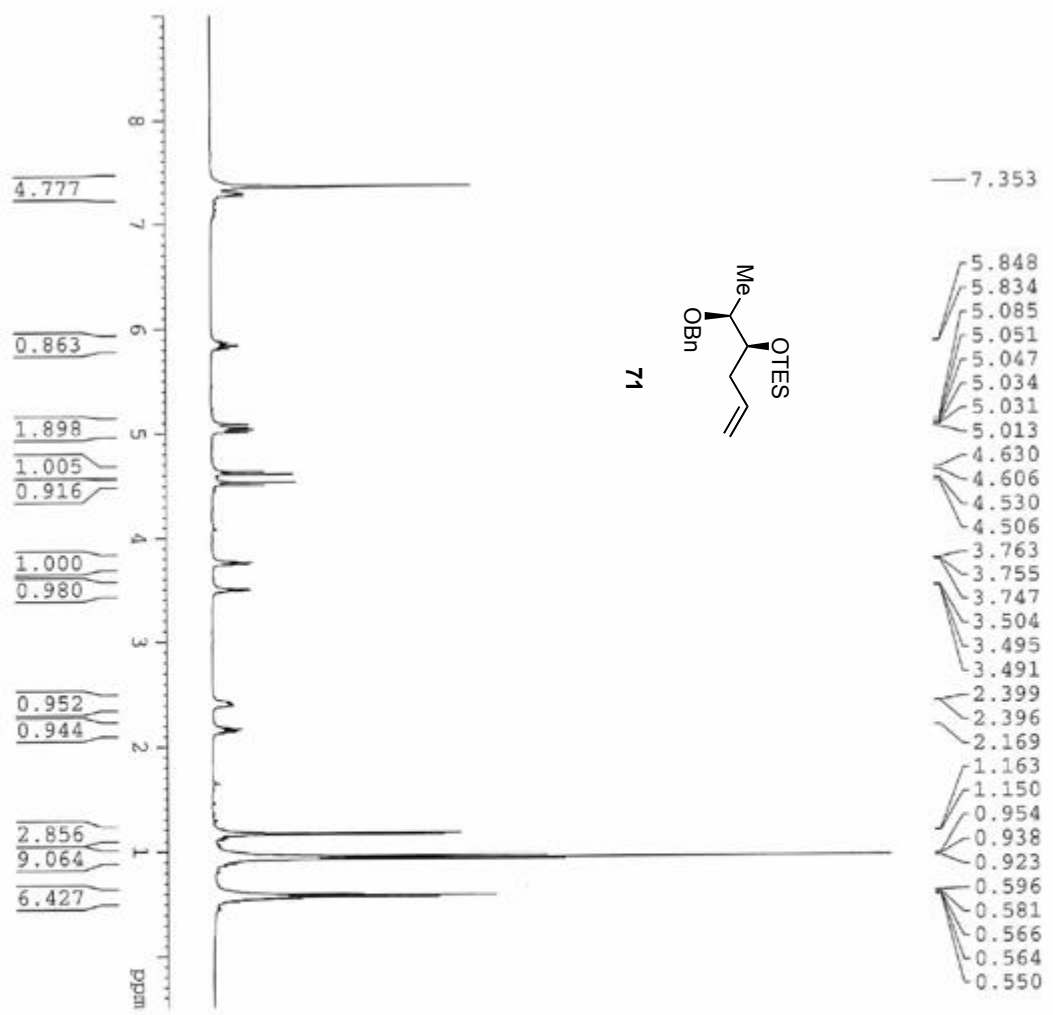

```

NAME          st11120
EXPNO         1
PROCNO       1
Date_         20100118
Time         18:45
INSTRUM      spect
PROBHD       5 mm QNP 1H
PULPROG      zgpg30
TD            45044
SOLVENT      CDCl3
NS            8
DS            0
SMH          7507.507 Hz
FIDRES       0.186671 Hz
AQ           2.7973804 sec
RG            12
RW           66.600 usroc
DE           4.50 usroc
TE           300.0 K
TD1          3.00000500 sec
D11
***** CHANNEL f1 *****
NUC1          1H
P1            9.00 usroc
PL1           0.00 dB
SFO1         500.135009 MHz
SI           65536
SF           500.1300230 MHz
WDM          EN
SSB          0
LB           0.30 Hz
GB           0
PC           1.00
  
```



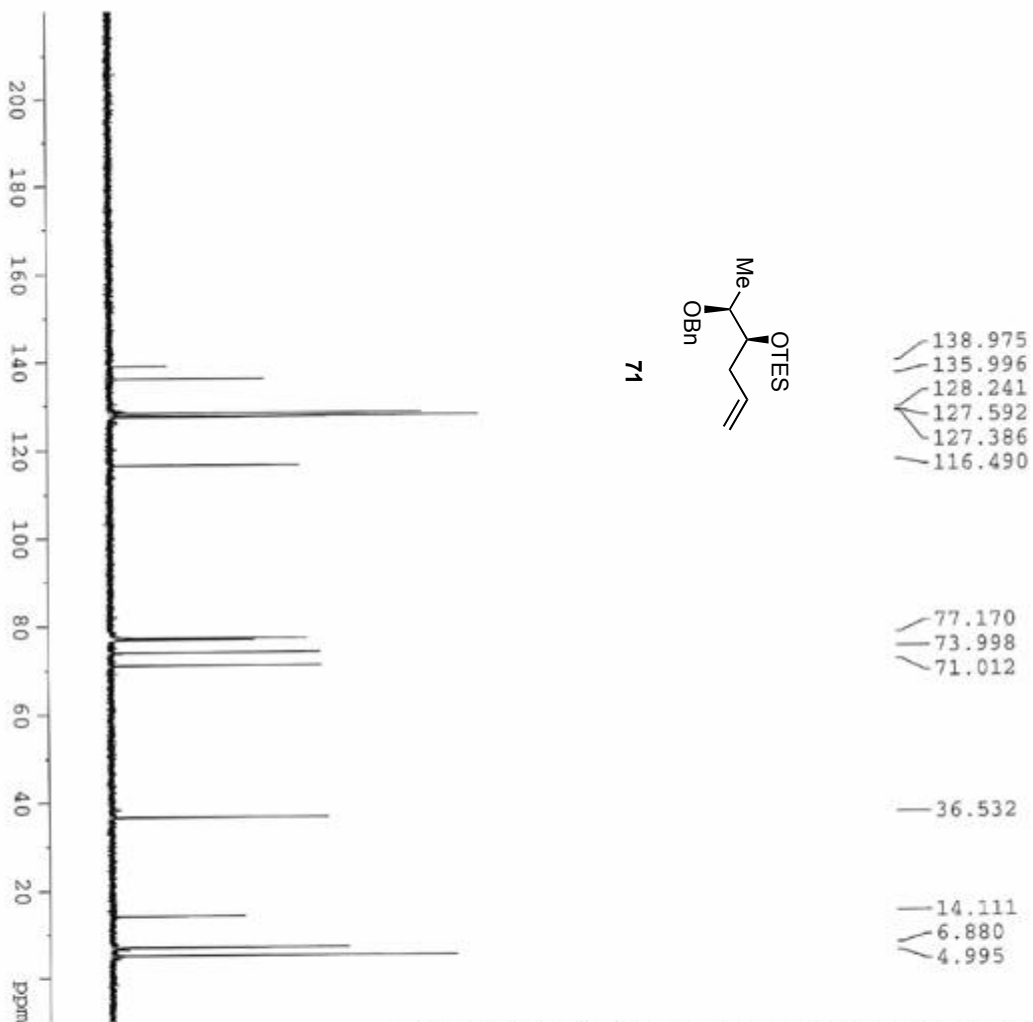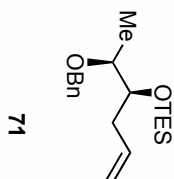

```

NAME          #111720
EXPNO         2
PROCNO        1
Date_         20100318
Time         18.56
INSTRUM       spect
PROBHD        5 mm QNP 1H
PULPROG       zgpg30
TD            65536
SOLVENT       CDCl3
NS           112
DS            4
SNH          30801.011 Hz
FIDRES       0.500013 Hz
AQ           0.9998830 sec
RG           16384
DE           16.500 usec
TE           300.0 K
D1           1.0000000 sec
D11          0.01000000 sec
----- CHANNEL f1 -----
NUC1          13C
P1           8.00 usec
PL1          1.00 dB
SFO1         125.7715724 MHz
----- CHANNEL f2 -----
CPDPRG2      waltz16
NUC2          1H
PCPD2        90.00 usec
PL2         120.00 dB
PL12         20.00 dB
SFO2         500.1318000 MHz
SI           32768
SF           125.7577947 MHz
WDW          EM
SSB          0
LB           1.00 Hz
GB           0
PC           1.40
  
```

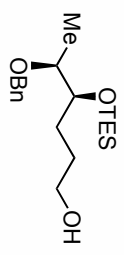

46

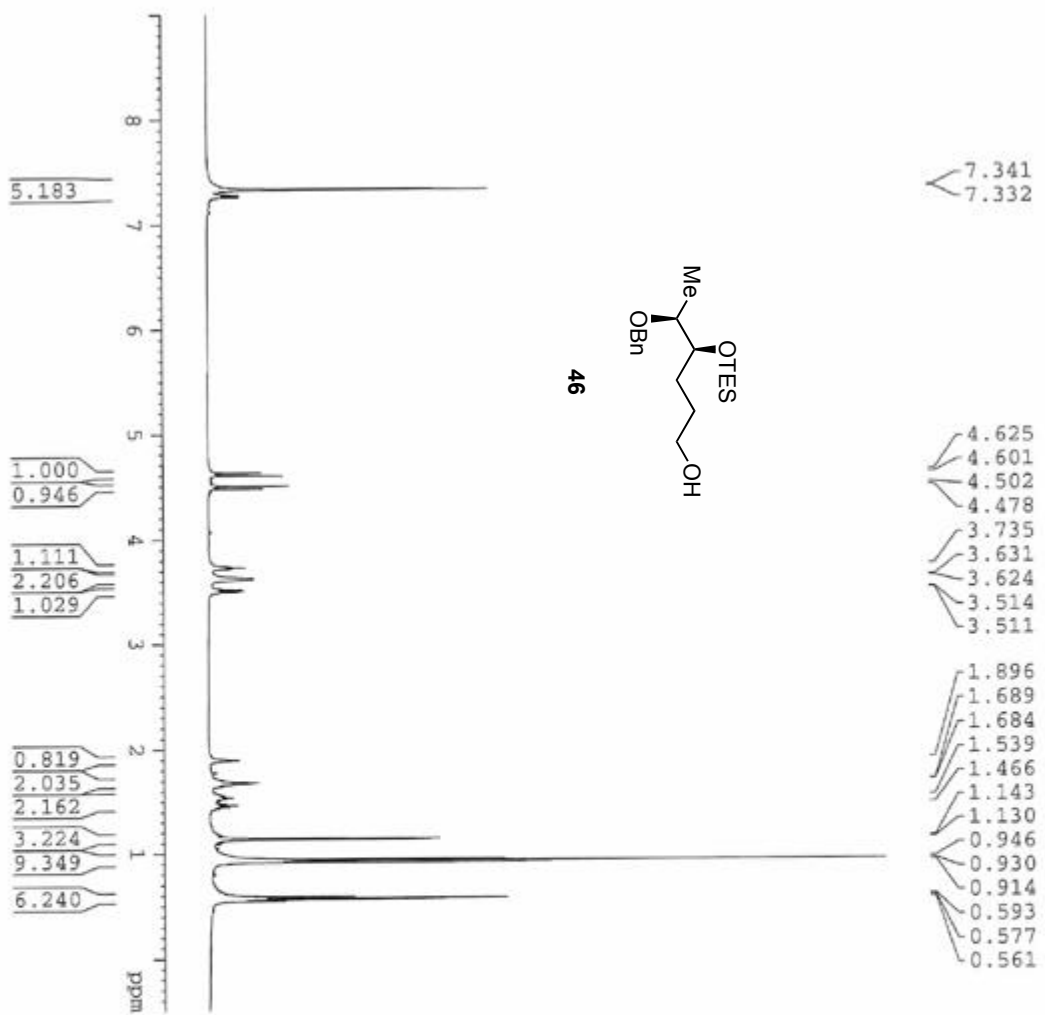

- 7.341
- 7.332
- 4.625
- 4.601
- 4.502
- 4.478
- 3.735
- 3.631
- 3.624
- 3.514
- 3.511
- 1.896
- 1.689
- 1.684
- 1.539
- 1.466
- 1.143
- 1.130
- 0.946
- 0.930
- 0.914
- 0.593
- 0.577
- 0.561

- 5.183
- 1.000
- 0.946
- 1.111
- 2.206
- 1.029
- 0.819
- 2.035
- 2.162
- 3.224
- 9.349
- 6.240

```

NAME          9E11121
EXPNO         1
PROCNO        1
Date_         20100126
Time          17.25
INSTRUM       spect
PROBHD        5 mm QNP 1H
PULPROG       zgpg30
TD            45044
SOLVENT       CDCl3
NS            8
DS            0
SWH           7507.507 Hz
FIDRES        0.166571 Hz
AQ            2.9999804 sec
RG            32
DM            66.600 usec
DE            4.50 usec
TE            300.0 K
TR            3.00000000 sec
D1
===== CHANNEL f1 =====
NUC1          1H
P1            9.00 usec
PL1           0.00 dB
SFO1          500.1335009 MHz
SI            65536
SF            500.1300128 MHz
WDW           EM
SSB           0
LB            0.30 Hz
GB            0
PC            1.00
  
```

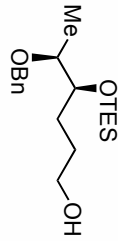

46

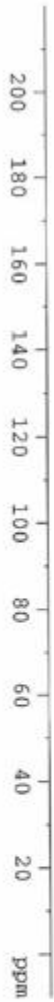

138.848  
128.243  
127.598  
127.419

77.216  
73.973  
70.991  
63.111

29.116  
27.925

13.840  
6.862  
4.959

```

NAME          at11121
EXPNO         2
PROCNO        1
Date_         20100326
Time         17.38
INSTRUM       spect
PROBHD        5 mm QNP 1H
PULPROG       zgpg30
TD            65536
SOLVENT       CDCl3
NS            32
DS            4
SWH           30303.031 Hz
F2IDRES       0.3000000 Hz
AQ            0.3998835 sec
RG            655
DM            16.500 usec
DE            7.50 usec
TE            300.0 K
D1            3.00000000 sec
d11           0.01000000 sec

===== CHANNEL f1 =====
NUC1          13C
P1            8.00 usec
PL1          -1.00 dB
SFO1         125.7715724 MHz

===== CHANNEL f2 =====
CPDPRG2      waltz16
NUC2          1H
PCPD2        90.00 usec
PL2          120.00 dB
PL12         20.00 dB
SFO2         500.1385000 MHz
SI           32768
SF           125.7577970 MHz
WDM          0
SSB          0
L3           1.00 Hz
GB           0
PC           1.40
  
```

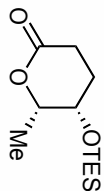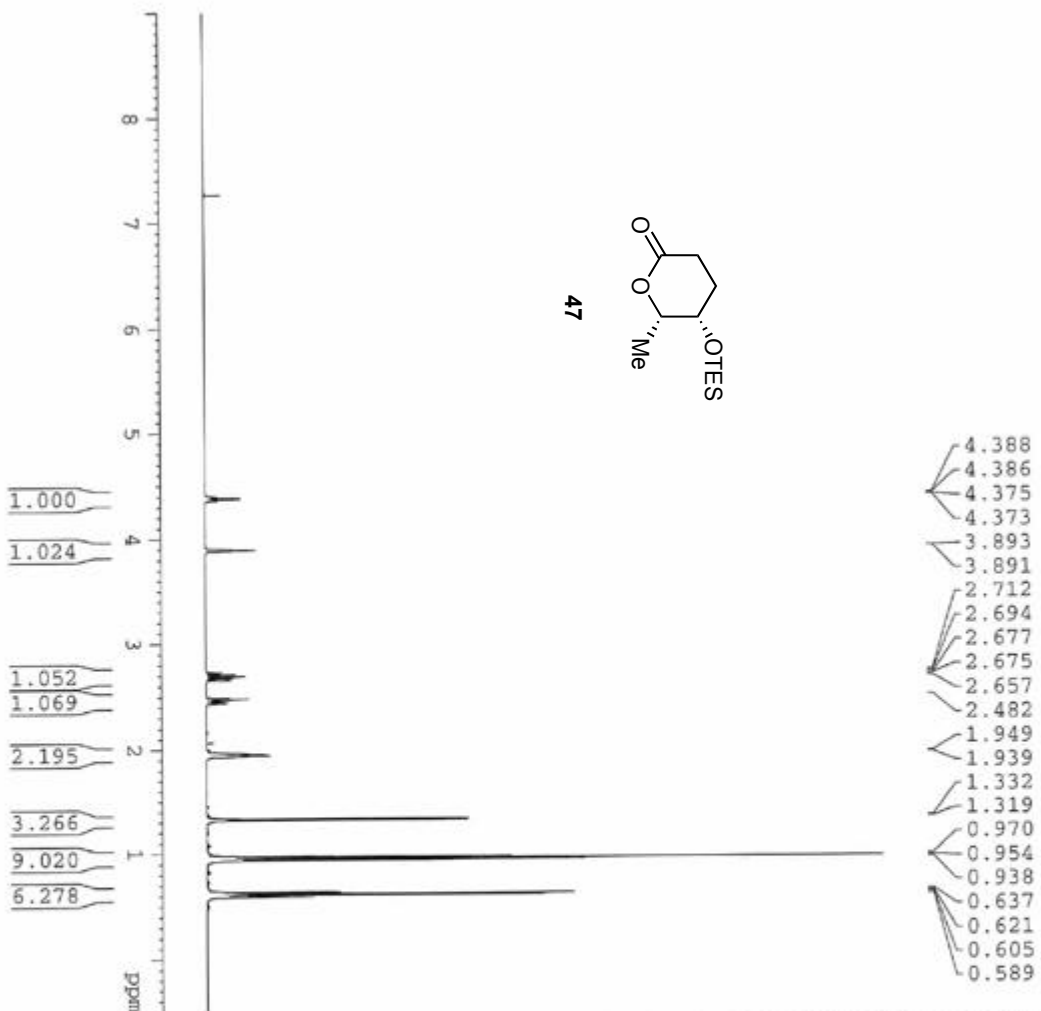

```

NAME          813125
EXPNO         3
PROCNO       1
Date_        20100402
Time         16.20
INSTRUM      spect
PROBHD       5 mm QNP 1H
PULPROG      zgpg30
TD           45044
SOLVENT      Acetone
NS           8
DS           0
SWH          7507.507 Hz
FIDRES       0.165671 Hz
AQ           2.9999804 sec
RG           12
WDW          EM
SSB          0
LB           0.30 Hz
GB           0
PC           1.00

***** CHANNEL f1 *****
NUC1          1H
P1           9.00 usec
PL1          0.00 dB
SFO1         500.1315009 MHz
SI           55536
SF           500.1300129 MHz
WDW          EM
SSB          0
LB           0.30 Hz
GB           0
PC           1.00
D1           3.00000000 sec
  
```

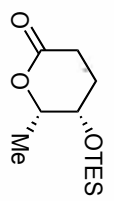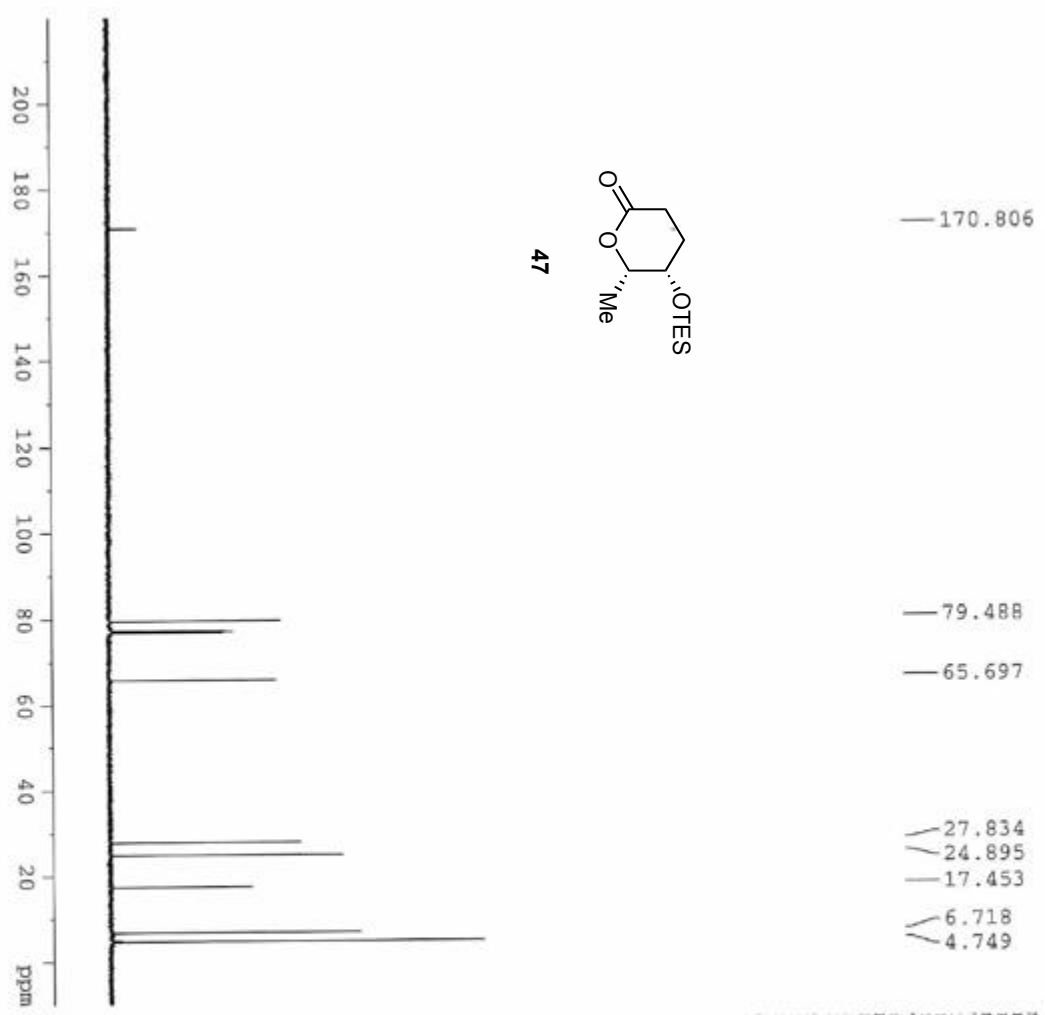

- 170.806
- 79.488
- 65.697
- 27.834
- 24.895
- 17.453
- 6.718
- 4.749

```

NAME          4713125
EXPNO         11
PROCNO        1
Date_         20100402
Time         16.10
INSTRUM       spect
PROBHD        5 mm QNP 1H
PULPROG       zgpg
TD            65536
SOLVENT       CDCl3
NS           104
DS           4
SWH          30301.631 Hz
FIDRES       0.540031 Hz
AQ           0.999831 sec
RG           8192
AQ           16.500 usec
DE           1.50 usec
TE           300.0 K
DEL          0.00000000 sec
D11          0.01000000 sec

***** CHANNEL f1 *****
NUC1          13C
P1           8.00 usec
PL1          3.00 dB
SFO1         125.7719724 MHz

***** CHANNEL f2 *****
CPDPRG2      waltz16
NUC2          1H
PCPD2        96.00 usec
PL2          120.00 dB
PL12         20.00 dB
SFO2         500.138000 MHz
SI           32768
SF           125.7577909 MHz
WDW          EM
SSB          0
LB           1.00 Hz
GB           0
PC           1.40
  
```

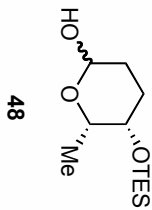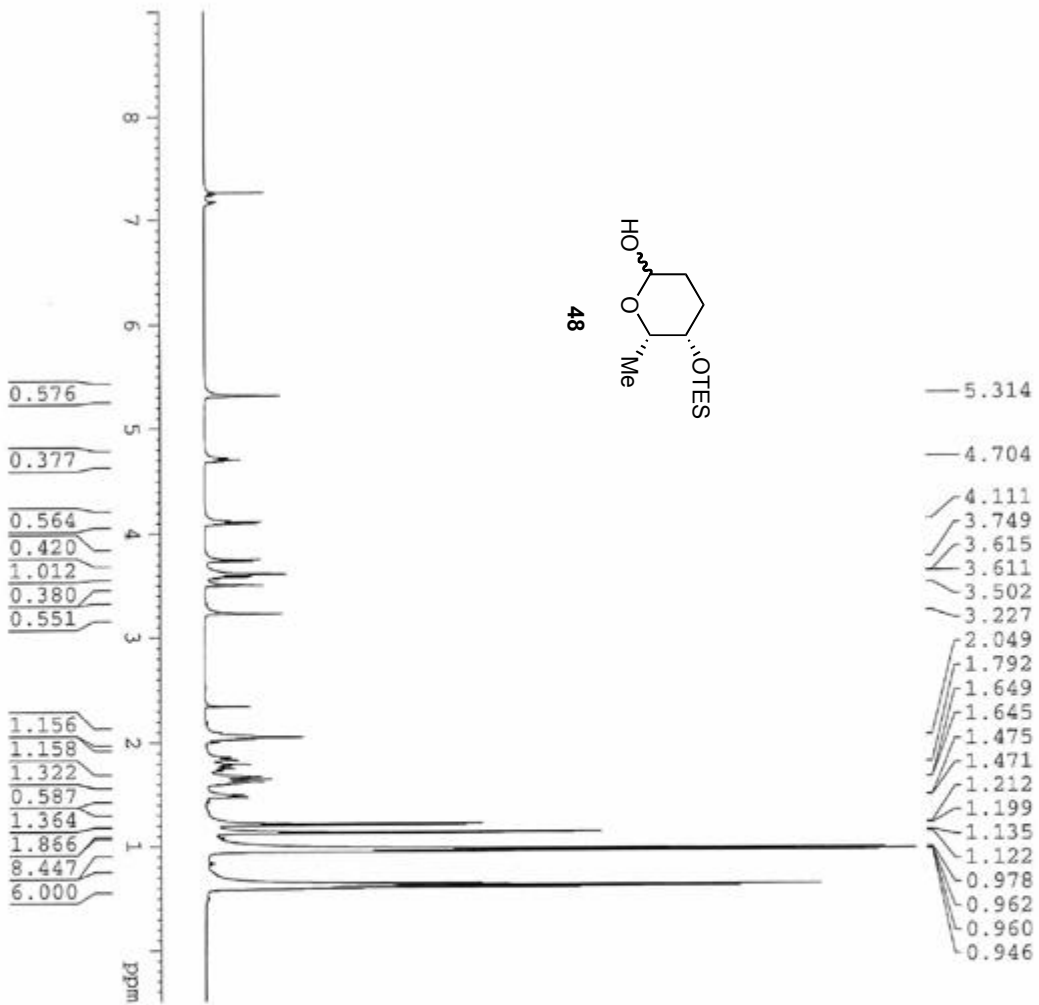

```

NAME          #11127
EXPNO         1
PROCNO       1
Date_         20100404
Time         16.50
INSTRUM      spect
PROBHD       5 mm QNP 1H
PULPROG      zgpg30
TD           45044
SOLVENT      CDCl3
NS           8
DS           0
SWH          7567.507 Hz
FIDRES      0.166671 Hz
AQ          2.7999804 sec
RG           66.600
DE          4.450 usec
TE           300.0 K
T2         3.00000000
D1          3.00000000 sec
***** CHANNEL f1 *****
NUC1          1H
P1           9.00 usec
PL           0.00 dB
SFO1         500.1315009 MHz
SI           63516
SF           500.1300129 MHz
WDW          EM
SSB          0
LB           0.30 Hz
GB           0
PC           1.00
  
```

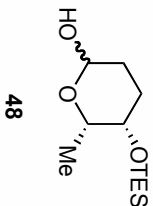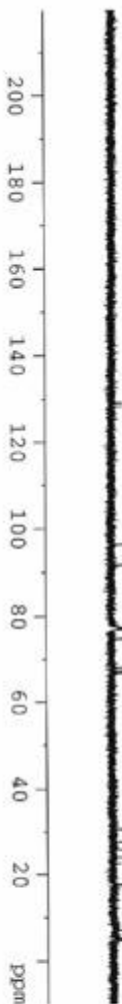

96.312  
91.572  
74.629  
67.834  
67.094  
66.672  
30.527  
27.509  
25.698  
23.844  
17.558  
17.336  
6.877  
4.850

```

NAME: s:11127
EXPNO: 1
PROCNO: 1
Date_ : 20100406
Time: 14.54
INSTRUM: spect
PROBHD: 5 mm QNP 1H
PULPROG: zgpg
TD: 65536
SOLVENT: CDCl3
NS: 64
DS: 4
SWH: 30103.031 Hz
FIDRES: 0.500033 Hz
AQ: 0.9998210 sec
RG: 1024
AQ: 10.384
DM: 16.500 usec
DE: 1.000 Hz
TE: 300.0 K
D1: 3.0000000 sec
d11: 0.0300000 sec
b11:

===== CHANNEL f1 =====
NUC1: 13C
P1: 8.00 usec
PL1: 3.00 dB
SFO1: 125.7715724 MHz

===== CHANNEL f2 =====
CPDPRG2: waltz16
NUC2: 1H
PCPD2: 90.00 usec
PL2: 120.00 dB
PL12: 20.00 dB
SFO2: 500.1358000 MHz
SI: 32768
SF: 125.7577943 MHz
WDW: EM
SSB: 0
LB: 1.00 Hz
GB: 0
PC: 1.40
  
```

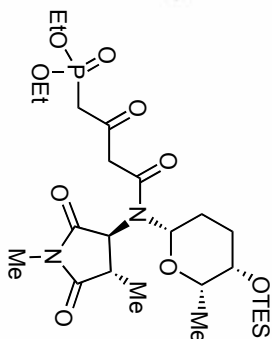

49

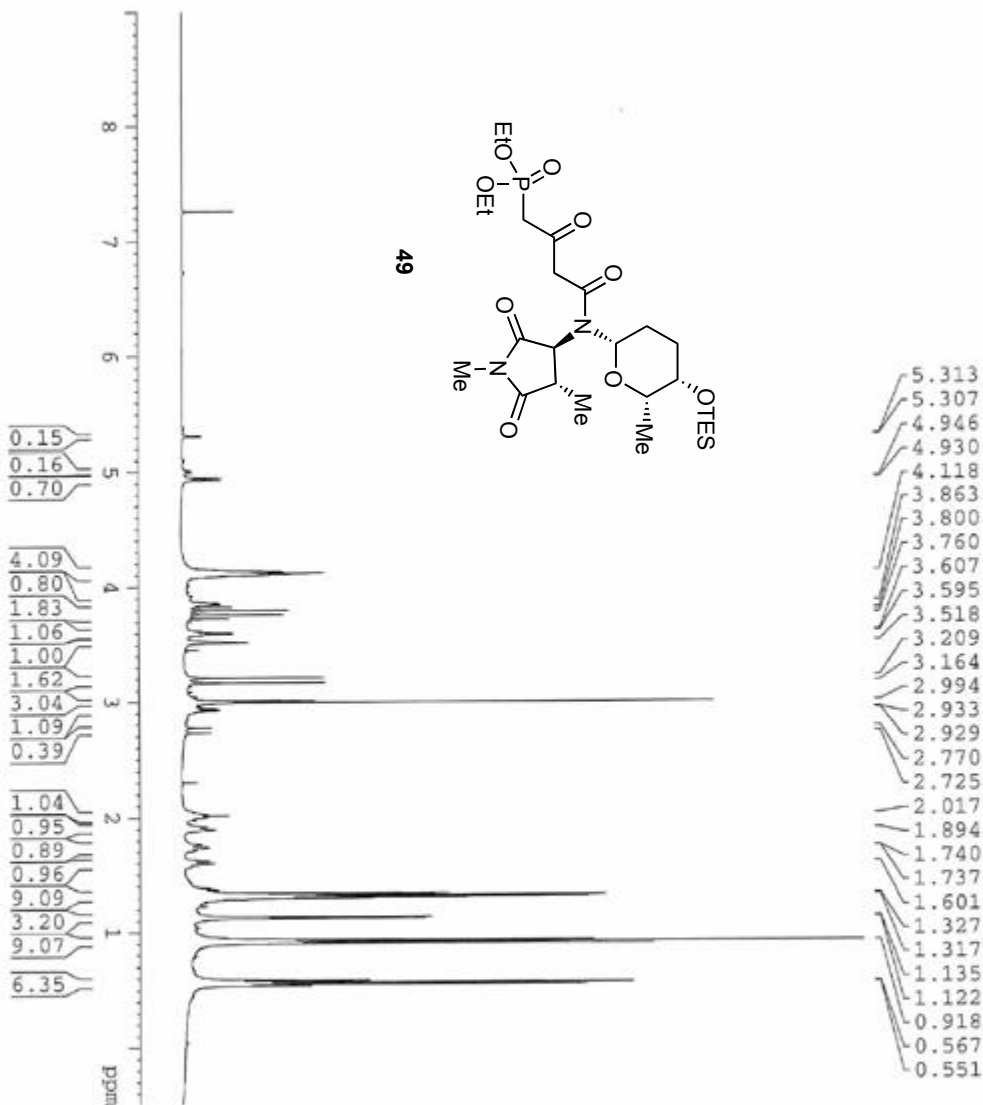

```

NAME: rt13052
EXPNO: 1
PROCNO: 1
Date_: 20100110
Time: 8.11
INSTRUM: spect
PROBHD: 5 mm PABBI 1H/
PULPROG: zgpg30
TD: 45044
SOLVENT: CDCl3
NS: 8
DS: 0
SWH: 7507.507 Hz
FIDRES: 0.166671 Hz
AQ: 2.9999804 sec
RG: 16
ENF: 66.600 us
DE: 7.50 us
TE: 294.9 K
D1: 3.00000000 sec
TD0: 1

***** CHANNEL f1 *****
NUC1: 1H
P1: 5.15 us
PL1: 0.00 dB
SFO1: 499.8733931 MHz
SF: 499.8700175 MHz
WDW: EM
SSB: 0
LR: 0.10 Hz
GB: 0
PC: 1.00

```



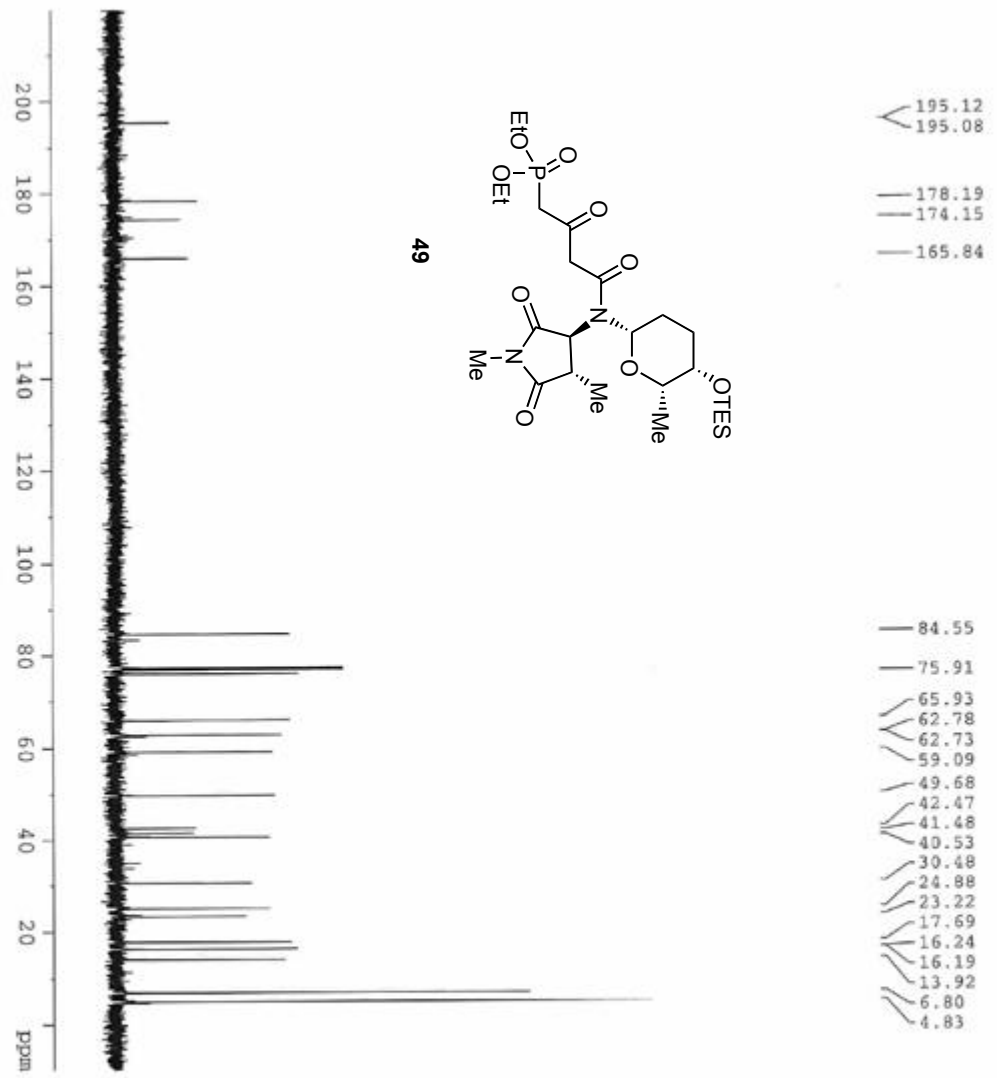

- 195.12
- 195.08
- 178.19
- 174.15
- 165.84
- 84.55
- 75.91
- 65.93
- 62.78
- 62.73
- 59.09
- 49.68
- 42.47
- 41.48
- 40.53
- 30.48
- 24.88
- 23.22
- 17.69
- 16.24
- 16.19
- 13.92
- 6.80
- 4.83

```

NAME          ac11052
EXPERNO      11
PROCNO       20100110
Date_        8-38
Time         8:38
INSTRUM      spect
PROBHD       5 mm PABBI 1H/
PULPROG      zgpg30
TD           65356
AQ           0.50000000
RG           14596.5
DE           7.50 usec
TE           295.2 K
D1           4.00000000 sec
D11          0.03000000 sec
TD0          1
===== CHANNEL f1 =====
NUC1         13C
P1           12.00 usec
PL1          -3.00 dB
SFO1         125.7074941 MHz
===== CHANNEL f2 =====
CQDPRG2     water16
NUC2         1H
PCPD2       90.00 usec
PL2         0.00 dB
PL12        28.00 dB
SFO2        499.8714991 MHz
SI          32768
SE          125.6924228 MHz
WIDW        EM
SSB         0
LB          1.00 Hz
GB          0
PC          1.40

```

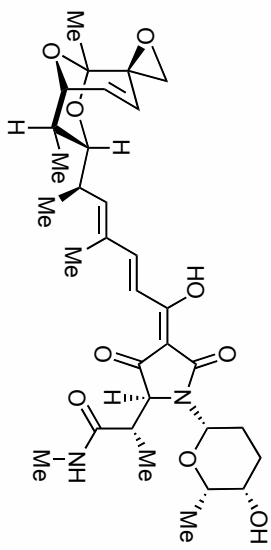

- 7.584
- 7.553
- 7.176
- 7.144
- 6.357
- 6.348
- 6.337
- 6.328
- 6.259
- 6.240
- 5.848
- 5.628
- 5.608
- 5.593
- 5.570
- 4.859
- 4.343
- 3.652
- 3.631
- 3.407
- 3.059
- 3.046
- 2.984
- 2.974
- 2.891
- 2.882
- 2.862
- 2.817
- 2.807
- 2.776
- 2.507
- 2.483
- 2.070
- 2.044
- 1.891
- 1.763
- 1.224
- 1.103
- 1.051
- 1.038

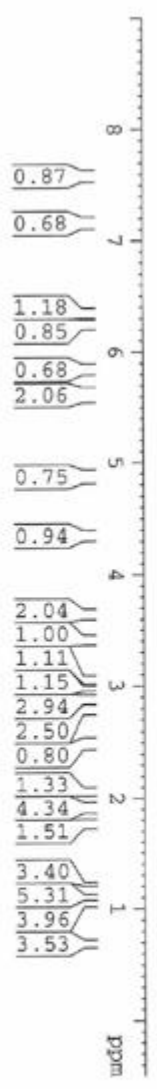

```

NAME          AT13141
EXPNO         2
PROCNO        1
Date_         20100420
Time         10.36
INSTRUM       spect
PROBHD        5 mm PABBI 1H/
PULPROG       zg
TD            45044
SOLVENT       Acetone-d6
NS            8
DS            0
SWH           7507.507 Hz
AQ            0.166671 Hz
FIDRES        2.9999804 sec
RG            128
DM           66.600 usec
DE           7.50 usec
TE           295.6 K
D1           1.00000000 sec
TD0           1

===== CHANNEL f1 =====
NUC1          1H
P1           5.35 usec
PL1          0.00 dB
SFO1         499.8734991 MHz
SI           12768
SF           499.8700197 MHz
WDW          EM
SSB          0
LB           0.30 Hz
GB           0
PC           1.00
  
```

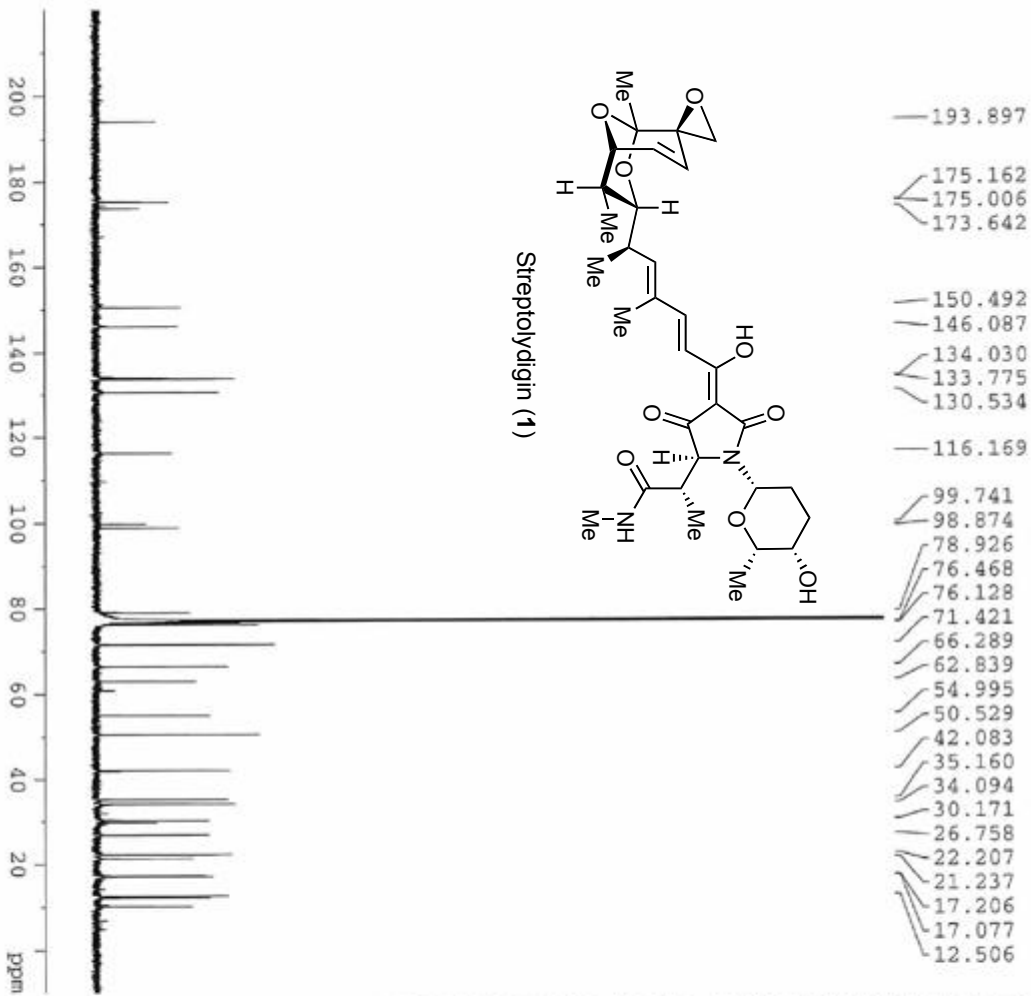

```

NAME          ec13141
EXPNO         4
PROCNO        1
DIRC          20100420
DATE_         21.19
TIME          21.19
INSTRUM       spect
PROBHD        5 mm QNP 1H
PULPROG       zgpg30
TD             66602
SOLVENT       CDCl3
NS            28670
DS            4
SMN           30303.031 Hz
PTDRES        0.500033 Hz
AQ            0.9999810 sec
RG            16384
DE           16.500 usec
TE            300.0 K
D1            0.10000001 sec
d11           0.030000000 sec

***** CHANNEL f1 *****
NUC1          13C
P1            4.00 usec
PL1           1.00 dB
SFO1          125.7713724 MHz

***** CHANNEL f2 *****
CPDPRG2      waltz16
NUC2          1H
PCPD2         90.00 usec
PL2           130.00 dB
PL12          30.00 dB
SFO2          500.1378000 MHz
SE            12768
SF            125.7577923 MHz
WDW           EM
SSB           0
LB            1.00 Hz
GB            0
PC            1.40
  
```

| Parameter                   | Value                                            |
|-----------------------------|--------------------------------------------------|
| Data File Name              | E:/ NMR Spectra/ 500-1/<br>22/ pdata/ 1/ 1r      |
| Title                       | AM                                               |
| Comment                     | 97/ 10/ 17, #5, 122.5 mg                         |
| Origin                      | UXNMR, Bruker<br>Analytische Messtechnik<br>GmbH |
| Owner                       | Jschwans                                         |
| Site                        |                                                  |
| Spectrometer                | spect                                            |
| Author                      |                                                  |
| Solvent                     | CDCl3                                            |
| 0 Temperature               | 300.0                                            |
| 1 Pulse Sequence            | zg                                               |
| 2 Number of Scans           | 32                                               |
| 3 Receiver Gain             | 128                                              |
| 4 Relaxation Delay          | 3.0000                                           |
| 5 Pulse Width               | 9.0000                                           |
| 6 Acquisition Time          | 3.0000                                           |
| 7 Acquisition Date          | 2011-01-23T13:24:00                              |
| 8 Modification Date         | 2011-02-17T16:13:10                              |
| 9 Spectrometer<br>Frequency | 500.13                                           |
| 0 Spectral Width            | 8012.8                                           |
| 1 Lowest<br>Frequency       | -1523.8                                          |
| 2 Nucleus                   | 1H                                               |
| 3 Acquired Size             | 24038                                            |
| 4 Spectral Size             | 65536                                            |

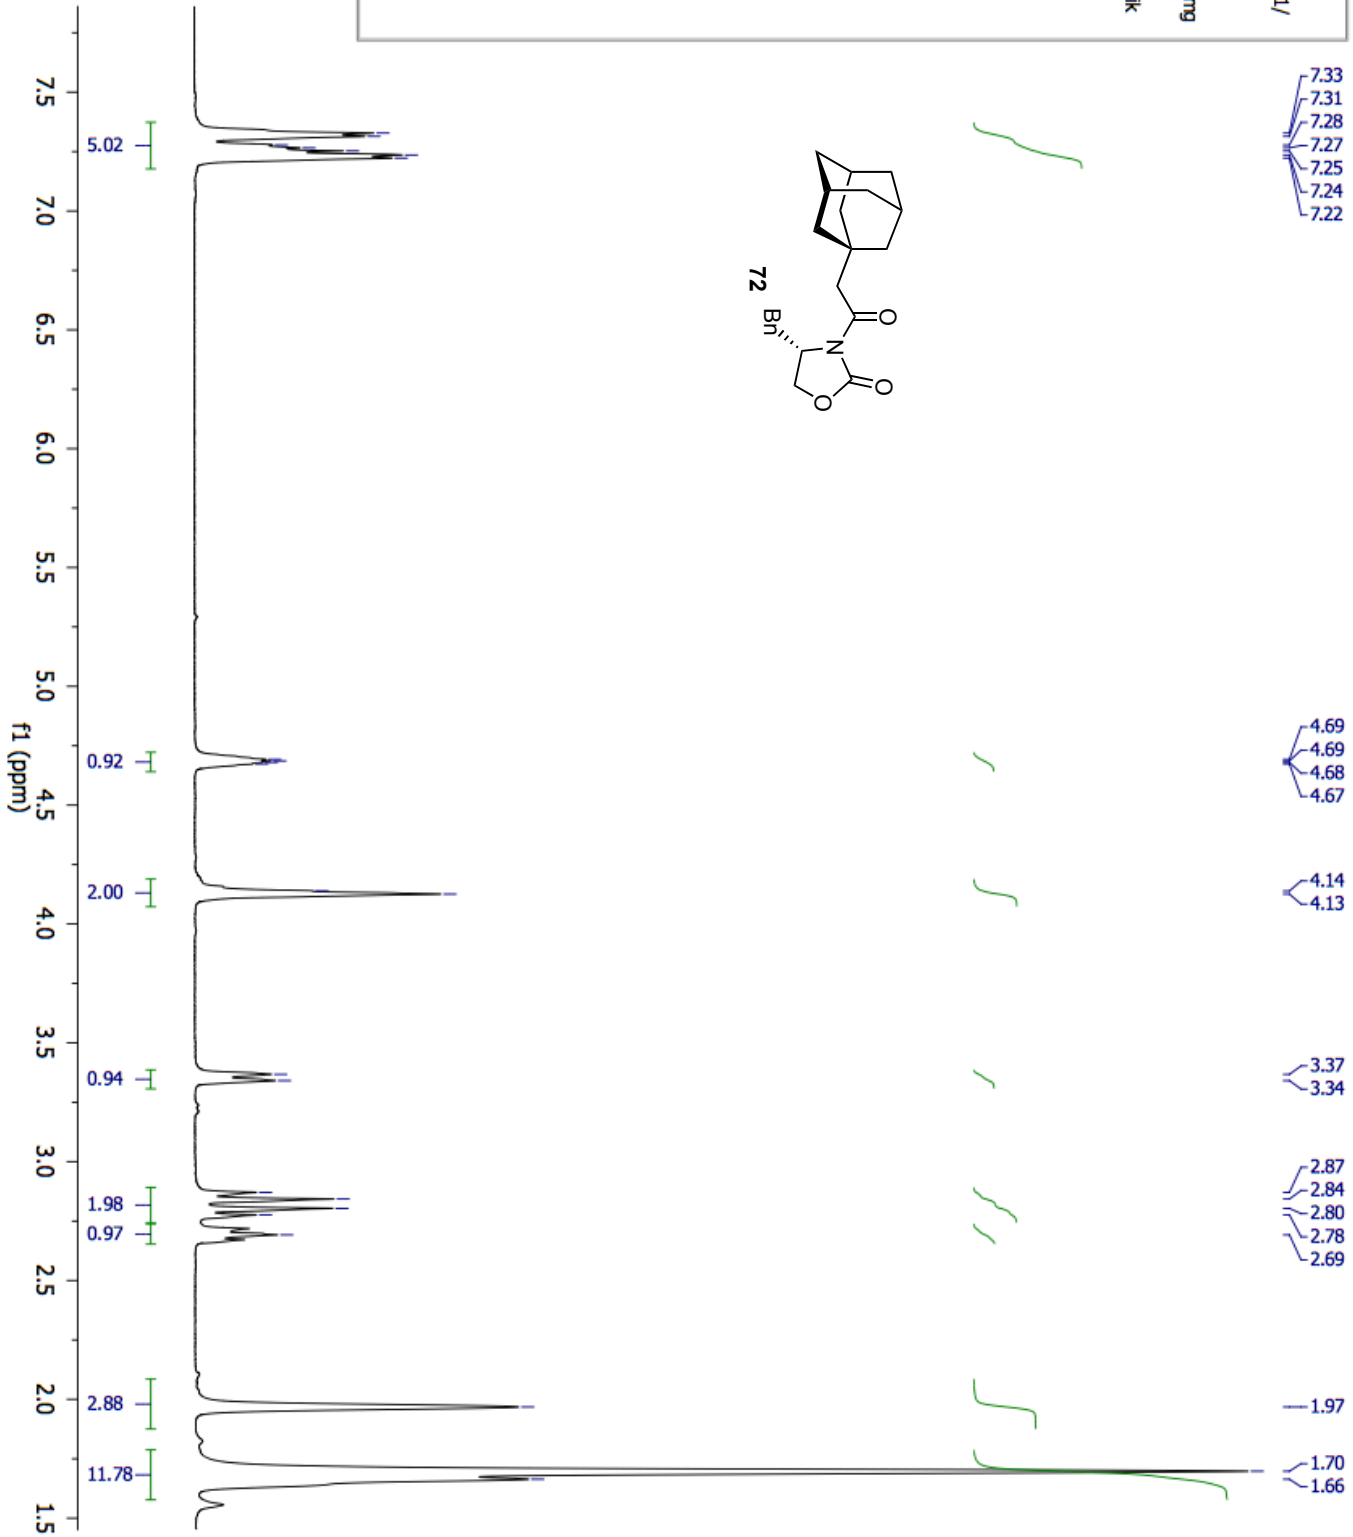

| Parameter                    | Value                                            |
|------------------------------|--------------------------------------------------|
| 1 Data File Name             | E:/NMR Spectra/500-1/<br>25/ f1                  |
| 2 Title                      | AM                                               |
| 3 Comment                    | 97/ 10/ 17, #5, 122.5 mg                         |
| 4 Origin                     | UXNMR, Bruker<br>Analytische Messtechnik<br>GmbH |
| 5 Owner                      | ajurkiew                                         |
| 6 Site                       |                                                  |
| 7 Spectrometer               | spect                                            |
| 8 Author                     |                                                  |
| 9 Solvent                    | CDCB3                                            |
| 10 Temperature               | 300.0                                            |
| 11 Pulse Sequence            | zgdc                                             |
| 12 Number of Scans           | 150                                              |
| 13 Receiver Gain             | 8192                                             |
| 14 Relaxation Delay          | 4.0000                                           |
| 15 Pulse Width               | 8.0000                                           |
| 16 Acquisition Time          | 1.7933                                           |
| 17 Acquisition Date          | 2011-01-23T14:42:00                              |
| 18 Modification Date         | 2011-03-14T07:26:54                              |
| 19 Spectrometer<br>Frequency | 125.76                                           |
| 20 Spectral Width            | 31446.5                                          |
| 21 Lowest<br>Frequency       | -6317.1                                          |
| 22 Nucleus                   | <sup>13</sup> C                                  |
| 23 Acquired Size             | 56390                                            |
| 24 Spectral Size             | 131072                                           |

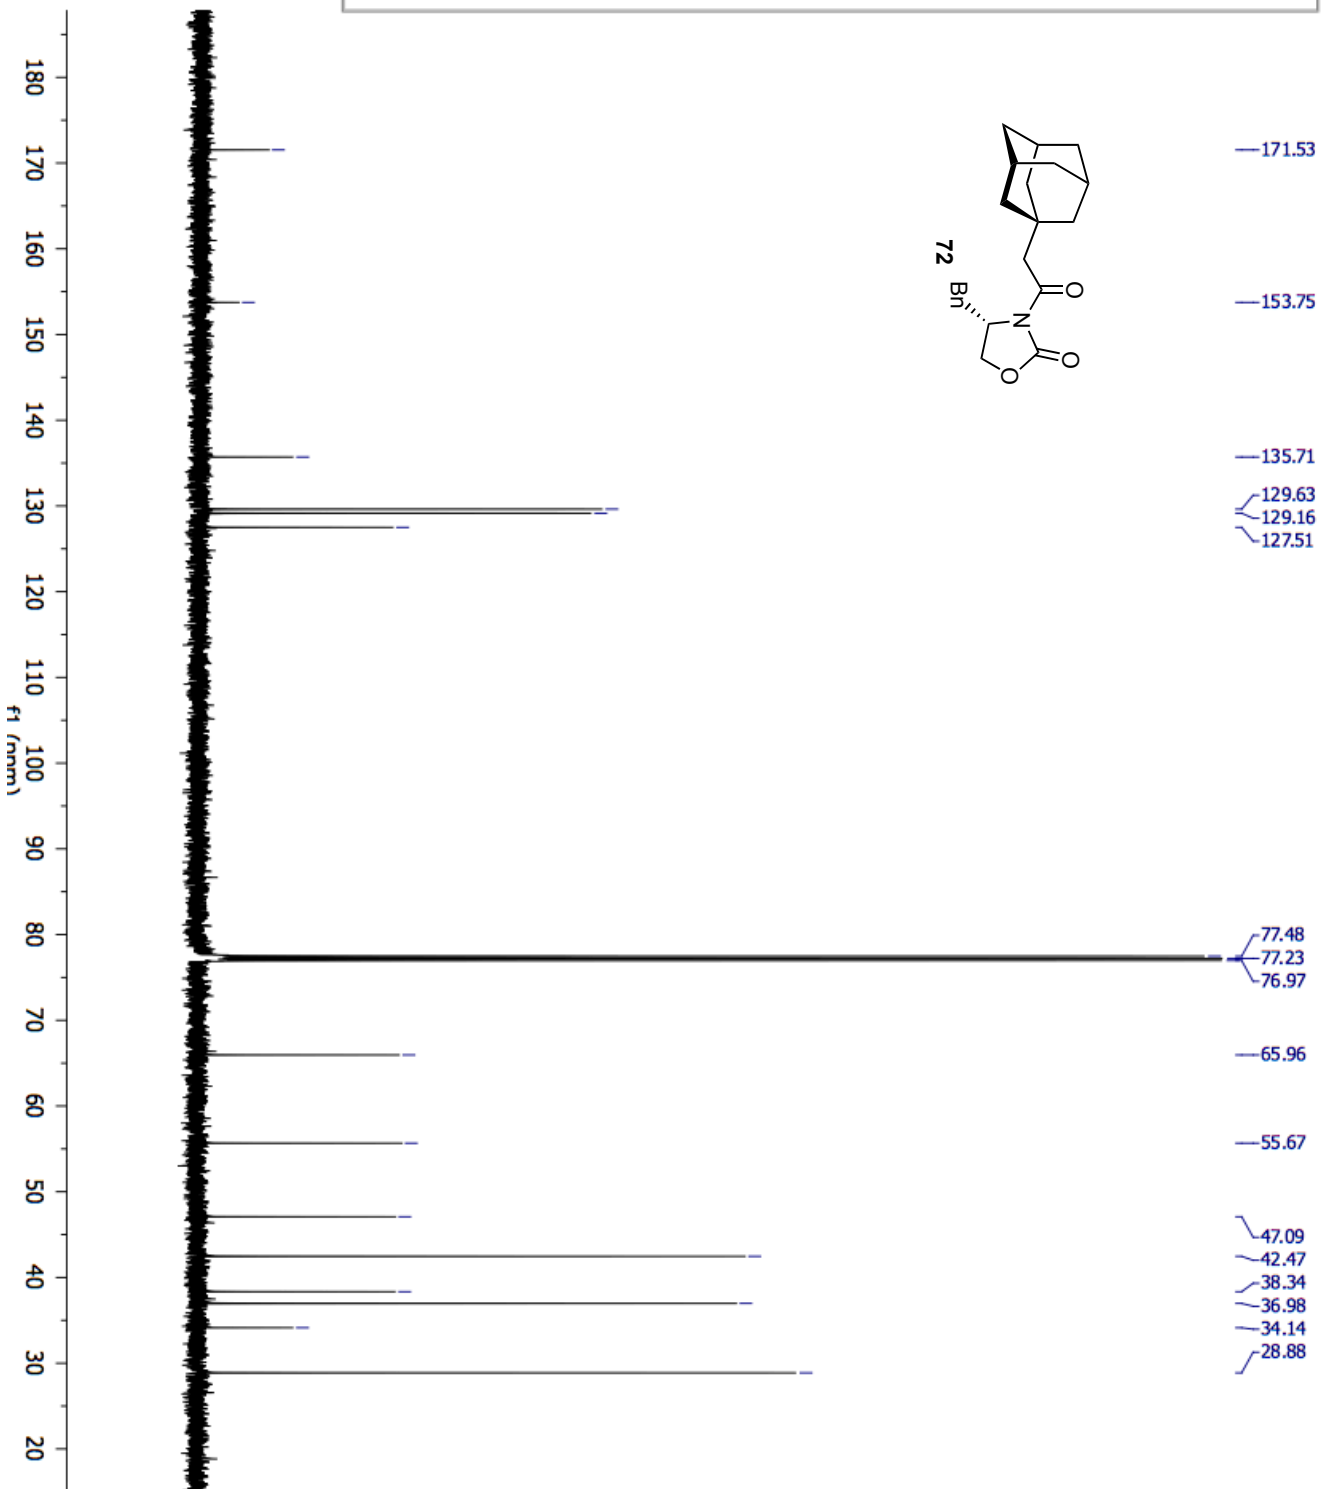

| Parameter                 | Value                                      |
|---------------------------|--------------------------------------------|
| 1 Data File Name          | E:/NMR Spectra/ 500-2/74/ fid              |
| 2 Title                   | 500-2                                      |
| 3 Comment                 |                                            |
| 4 Origin                  | UXNMR, Bruker Analytische Messtechnik GmbH |
| 5 Owner                   | root                                       |
| 6 Site                    |                                            |
| 7 Spectrometer            | spect                                      |
| 8 Author                  |                                            |
| 9 Solvent                 | CDCl3                                      |
| 10 Temperature            | 294.9                                      |
| 11 Pulse Sequence         | zg                                         |
| 12 Number of Scans        | 32                                         |
| 13 Receiver Gain          | 51                                         |
| 14 Relaxation Delay       | 10.0000                                    |
| 15 Pulse Width            | 8.0000                                     |
| 16 Acquisition Time       | 2.9999                                     |
| 17 Acquisition Date       | 2011-02-19T04:18:31                        |
| 18 Modification Date      | 2011-02-19T11:18:34                        |
| 19 Spectrometer Frequency | 499.87                                     |
| 20 Spectral Width         | 10000.0                                    |
| 21 Lowest Frequency       | -2000.8                                    |
| 22 Nucleus                | <sup>1</sup> H                             |
| 23 Acquired Size          | 29999                                      |
| 24 Spectral Size          | 65536                                      |

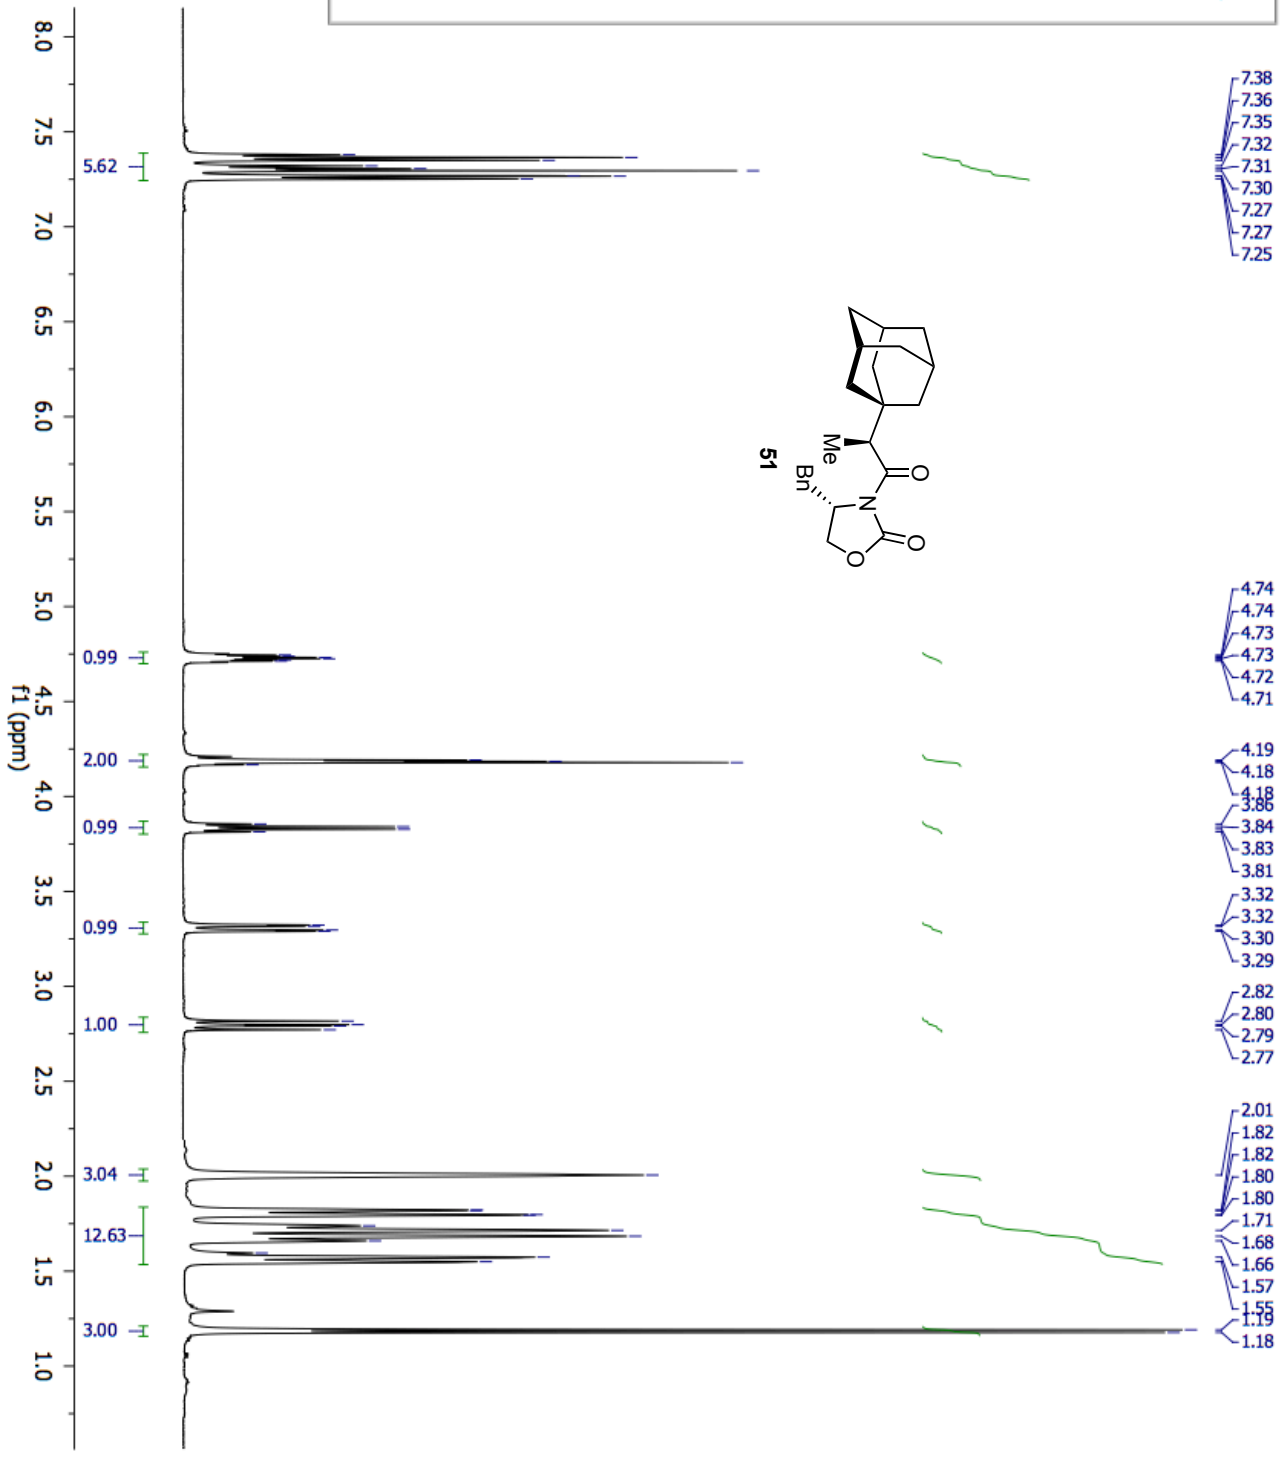

| Parameter                 | Value                                            |
|---------------------------|--------------------------------------------------|
| 1 Data File Name          | E:/ NMR Spectra / 500-1/<br>37/ f1d              |
| 2 Title                   | 500-1                                            |
| 3 Comment                 | 97/ 10/ 17, #5, 122.5 mg                         |
| 4 Origin                  | UXNMR, Bruker<br>Analytische Messtechnik<br>GmbH |
| 5 Owner                   | ajunklew                                         |
| 6 Site                    |                                                  |
| 7 Spectrometer            | spect                                            |
| 8 Author                  |                                                  |
| 9 Solvent                 | CDCl3                                            |
| 10 Temperature            | 300.0                                            |
| 11 Pulse Sequence         | zgdc                                             |
| 12 Number of Scans        | 500                                              |
| 13 Receiver Gain          | 8192                                             |
| 14 Relaxation Delay       | 3.0000                                           |
| 15 Pulse Width            | 8.0000                                           |
| 16 Acquisition Time       | 1.5000                                           |
| 17 Acquisition Date       | 2011-03-04T11:35:57                              |
| 18 Modification Date      | 2011-03-04T11:31:10                              |
| 19 Spectrometer Frequency | 125.76                                           |
| 20 Spectral Width         | 37594.0                                          |
| 21 Lowest Frequency       | -9374.6                                          |
| 22 Nucleus                | <sup>13</sup> C                                  |
| 23 Acquired Size          | 56390                                            |
| 24 Spectral Size          | 131072                                           |

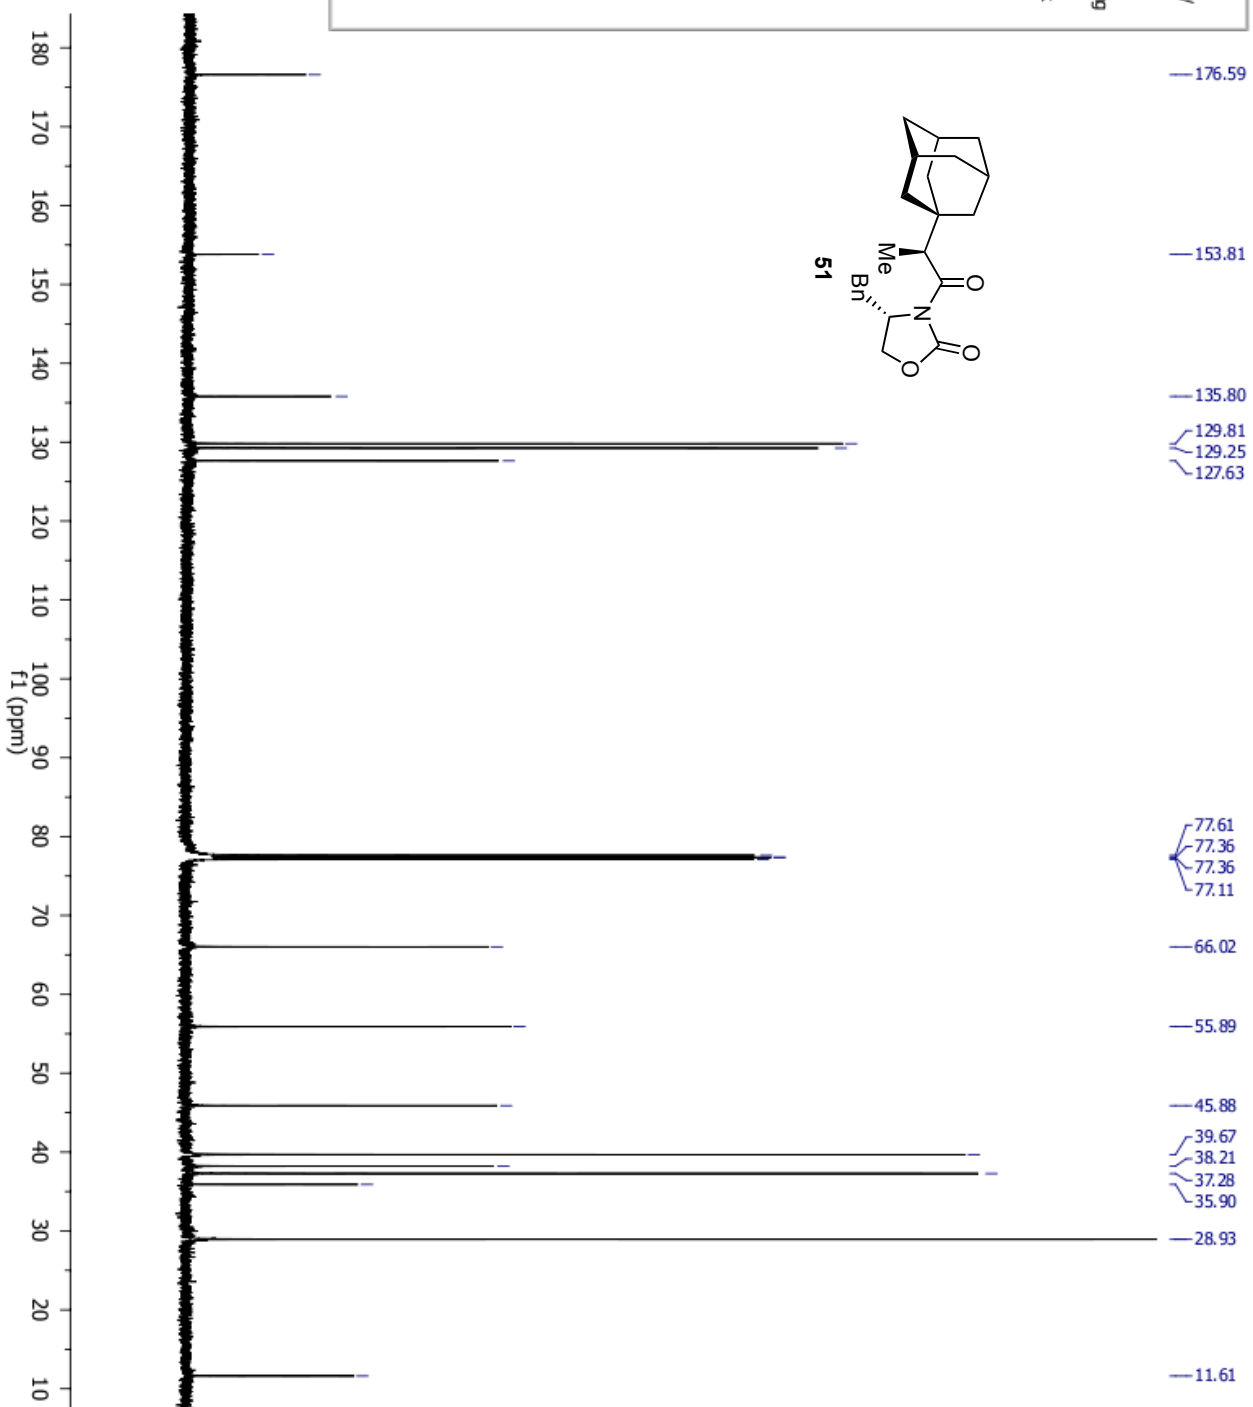

| Parameter                 | Value                                      |
|---------------------------|--------------------------------------------|
| 1 Data File Name          | E:/NMR Spectra/500-1/29/fid                |
| 2 Title                   | AM                                         |
| 3 Comment                 | 97/10/17, #5, 122.5 mg                     |
| 4 Origin                  | UXNMR, Bruker Analytische Messtechnik GmbH |
| 5 Owner                   | ajurkiew                                   |
| 6 Site                    |                                            |
| 7 Spectrometer            | spect                                      |
| 8 Author                  |                                            |
| 9 Solvent                 | CDCl3                                      |
| 10 Temperature            | 300.0                                      |
| 11 Pulse Sequence         | zg                                         |
| 12 Number of Scans        | 32                                         |
| 13 Receiver Gain          | 64                                         |
| 14 Relaxation Delay       | 3.0000                                     |
| 15 Pulse Width            | 9.0000                                     |
| 16 Acquisition Time       | 3.0000                                     |
| 17 Acquisition Date       | 2011-01-31T13:33:00                        |
| 18 Modification Date      | 2011-03-02T09:28:38                        |
| 19 Spectrometer Frequency | 500.13                                     |
| 20 Spectral Width         | 8012.8                                     |
| 21 Lowest Frequency       | -1519.5                                    |
| 22 Nucleus                | 1H                                         |
| 23 Acquired Size          | 24038                                      |
| 24 Spectral Size          | 65536                                      |

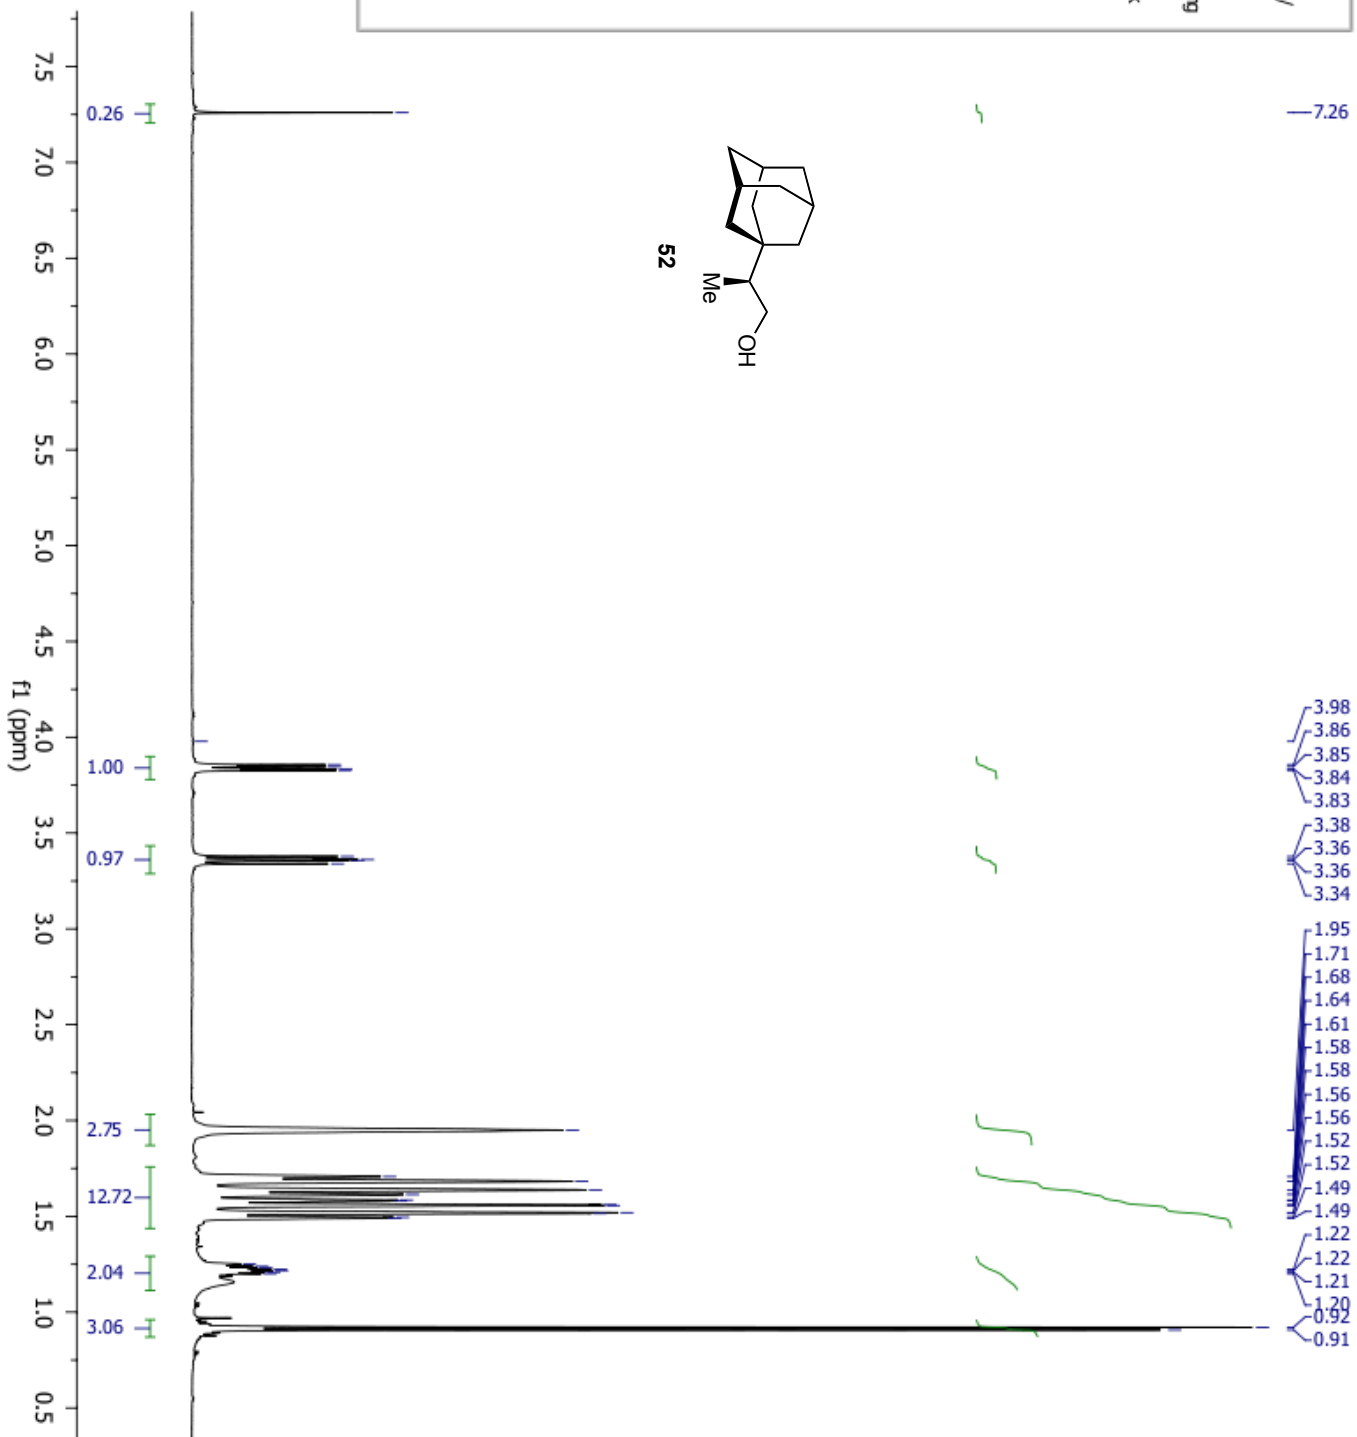



| Parameter            | Value                                            |
|----------------------|--------------------------------------------------|
| 1 Data File Name     | E:/NMR Spectra/ 500-1/<br>32/ f1d                |
| 2 Title              | AM                                               |
| 3 Comment            | 97/ 10/ 17, #5, 122.5 mg                         |
| 4 Origin             | UXNMR, Bruker<br>Analytische Messtechnik<br>GmbH |
| 5 Owner              | ajurkiew                                         |
| 6 Site               |                                                  |
| 7 Spectrometer       | spect                                            |
| 8 Author             |                                                  |
| 9 Solvent            | CDCl3                                            |
| 10 Temperature       | 300.0                                            |
| 11 Pulse Sequence    | zgdc                                             |
| 12 Number of Scans   | 20                                               |
| 13 Receiver Gain     | 4096                                             |
| 14 Relaxation Delay  | 4.0000                                           |
| 15 Pulse Width       | 8.0000                                           |
| 16 Acquisition Time  | 3.0000                                           |
| 17 Acquisition Date  | 2011-01-31T14:51:00                              |
| 18 Modification Date | 2011-03-02T09:29:00                              |
| 19 Spectrometer      | 125.76                                           |
| Frequency            |                                                  |
| 20 Spectral Width    | 18797.0                                          |
| 21 Lowest            | -0.4                                             |
| Frequency            |                                                  |
| 22 Nucleus           | 13C                                              |
| 23 Acquired Size     | 56390                                            |
| 24 Spectral Size     | 131072                                           |

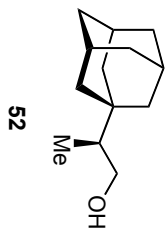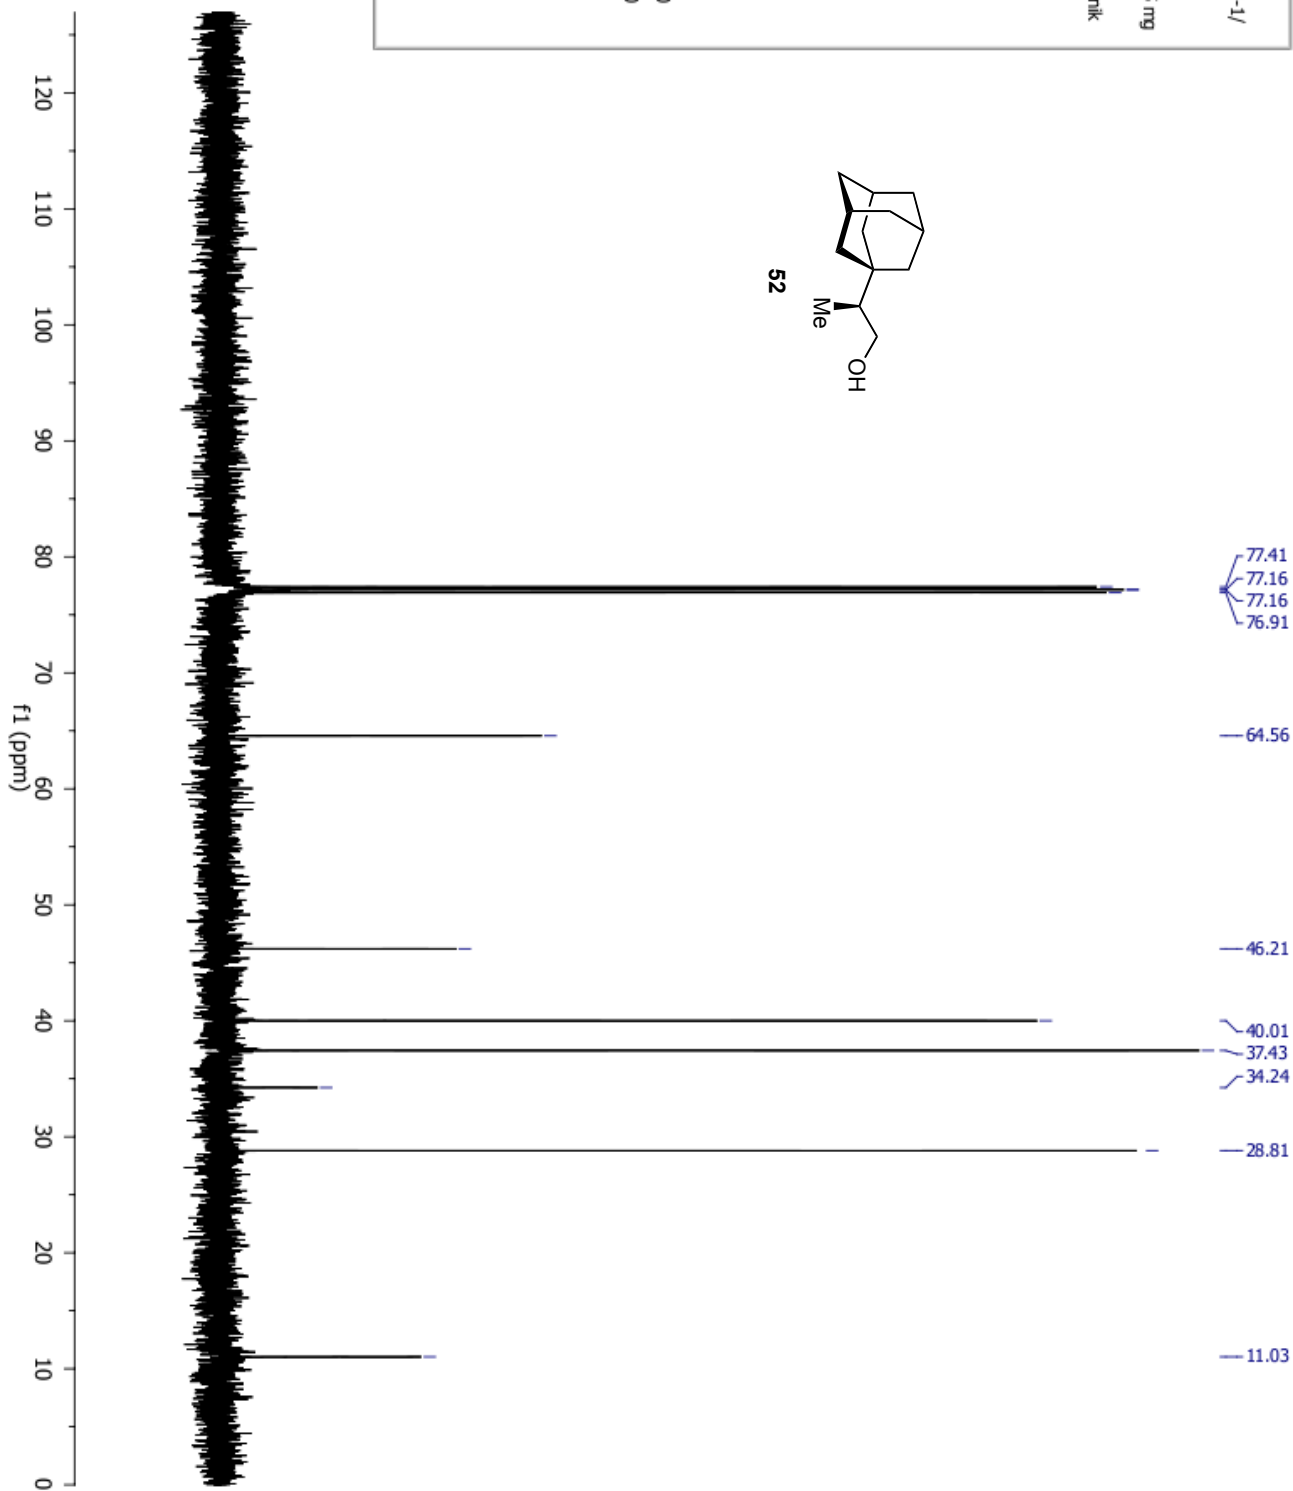

| Parameter            | Value                                            |
|----------------------|--------------------------------------------------|
| 1 Data File Name     | E:/ NMR Spectral/ 500-2/ 93/ fid                 |
| 2 Title              | 500-2                                            |
| 3 Comment            |                                                  |
| 4 Origin             | UXNMR, Bruker<br>Analytische Messtechnik<br>GmbH |
| 5 Owner              | root                                             |
| 6 Site               |                                                  |
| 7 Spectrometer       | spect                                            |
| 8 Author             |                                                  |
| 9 Solvent            | CDCl3                                            |
| 10 Temperature       | 294.7                                            |
| 11 Pulse Sequence    | zg                                               |
| 12 Number of Scans   | 32                                               |
| 13 Receiver Gain     | 57                                               |
| 14 Relaxation Delay  | 10.0000                                          |
| 15 Pulse Width       | 5.3500                                           |
| 16 Acquisition Time  | 2.9999                                           |
| 17 Acquisition Date  | 2011-03-14T04:28:42                              |
| 18 Modification Date | 2011-03-14T10:28:44                              |
| 19 Spectrometer      | 499.87                                           |
| Frequency            |                                                  |
| 20 Spectral Width    | 10000.0                                          |
| 21 Lowest            | -2018.8                                          |
| Frequency            |                                                  |
| 22 Nucleus           | 1H                                               |
| 23 Acquired Size     | 29999                                            |
| 24 Spectral Size     | 65536                                            |

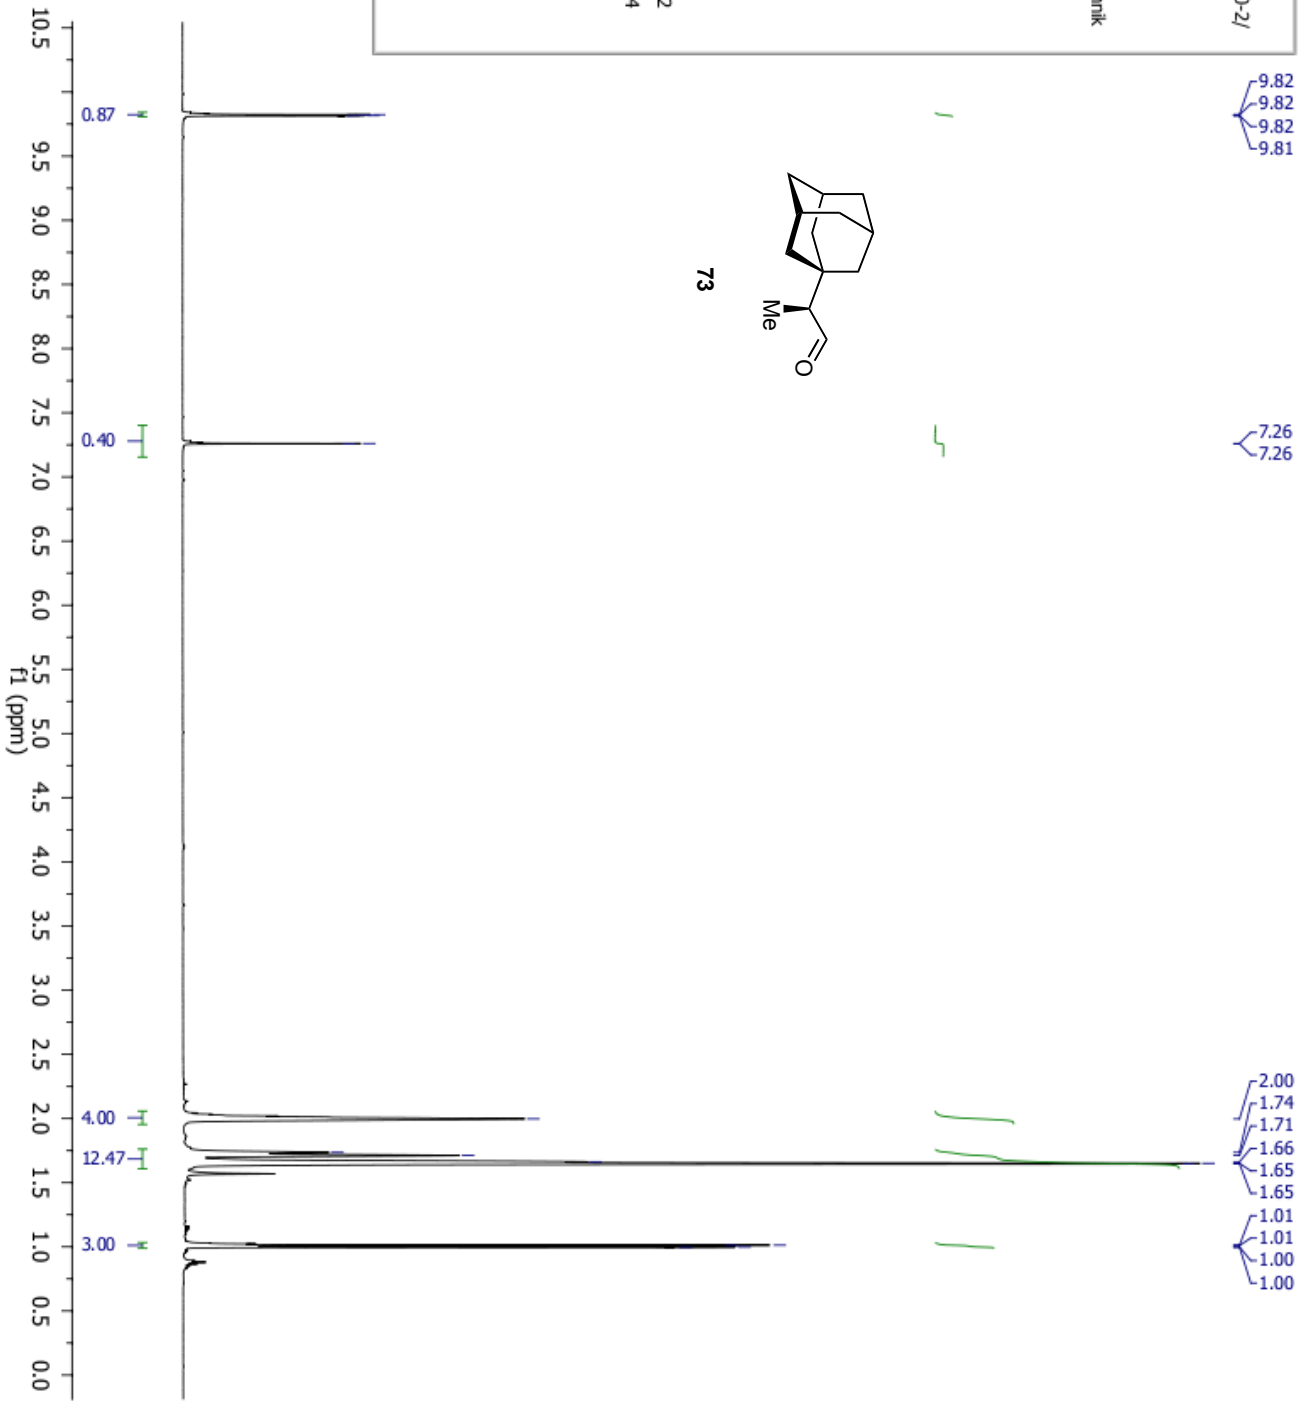

| Parameter                    | Value                                            |
|------------------------------|--------------------------------------------------|
| 1 Data File Name             | E:/ NMR Spectra/ 500-1/<br>42/ F1d               |
| 2 Title                      | 500-1                                            |
| 3 Comment                    | 97/ 10/ 17, #5, 122.5 mg                         |
| 4 Origin                     | UXNMR, Bruker<br>Analytische Messtechnik<br>GmbH |
| 5 Owner                      | j.schwans                                        |
| 6 Site                       |                                                  |
| 7 Spectrometer               | spect                                            |
| 8 Author                     |                                                  |
| 9 Solvent                    | CDCl3                                            |
| 10 Temperature               | 300.0                                            |
| 11 Pulse Sequence            | zgdc                                             |
| 12 Number of Scans           | 500                                              |
| 13 Receiver Gain             | 8192                                             |
| 14 Relaxation Delay          | 4.0000                                           |
| 15 Pulse Width               | 8.0000                                           |
| 16 Acquisition Time          | 1.5000                                           |
| 17 Acquisition Date          | 2011-03-10T09:28:56                              |
| 18 Modification Date         | 2011-03-14T07:29:40                              |
| 19 Spectrometer<br>Frequency | 125.76                                           |
| 20 Spectral Width            | 37594.0                                          |
| 21 Lowest<br>Frequency       | -9428.0                                          |
| 22 Nucleus                   | <sup>13</sup> C                                  |
| 23 Acquired Size             | 56390                                            |
| 24 Spectral Size             | 131072                                           |

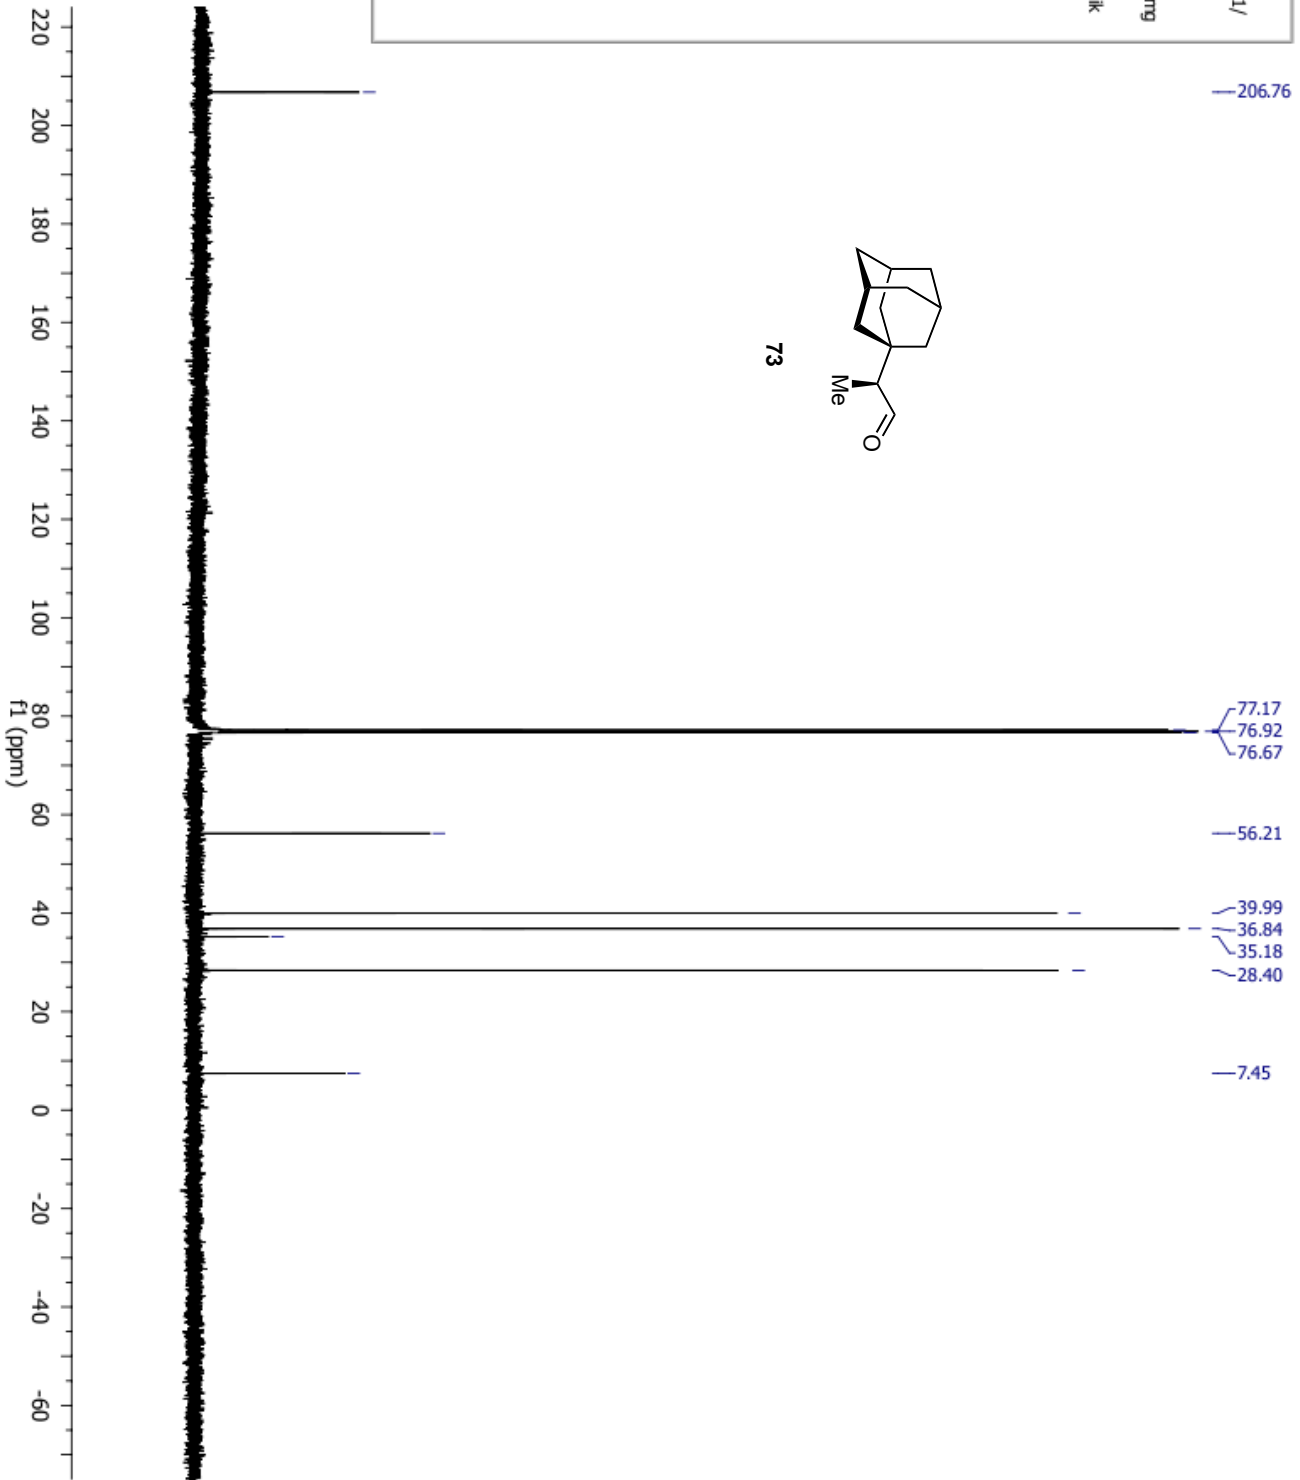

| Parameter                 | Value                                            |
|---------------------------|--------------------------------------------------|
| 1 Data File Name          | E:/NMR Spectra/ 500-2/<br>82/ f1d                |
| 2 Title                   | 500-2                                            |
| 3 Comment                 |                                                  |
| 4 Origin                  | UXNMR, Bruker<br>Analytische Messtechnik<br>GmbH |
| 5 Owner                   | root                                             |
| 6 Site                    |                                                  |
| 7 Spectrometer            | spect                                            |
| 8 Author                  |                                                  |
| 9 Solvent                 | Acetone                                          |
| 10 Temperature            | 294.8                                            |
| 11 Pulse Sequence         | zg                                               |
| 12 Number of Scans        | 32                                               |
| 13 Receiver Gain          | 51                                               |
| 14 Relaxation Delay       | 10.0000                                          |
| 15 Pulse Width            | 8.0000                                           |
| 16 Acquisition Time       | 2.9999                                           |
| 17 Acquisition Date       | 2011-02-23T05:31:13                              |
| 18 Modification Date      | 2011-02-23T12:31:14                              |
| 19 Spectrometer Frequency | 499.87                                           |
| 20 Spectral Width         | 10000.0                                          |
| 21 Lowest Frequency       | -2018.8                                          |
| 22 Nucleus                | <sup>1</sup> H                                   |
| 23 Acquired Size          | 29999                                            |
| 24 Spectral Size          | 65536                                            |

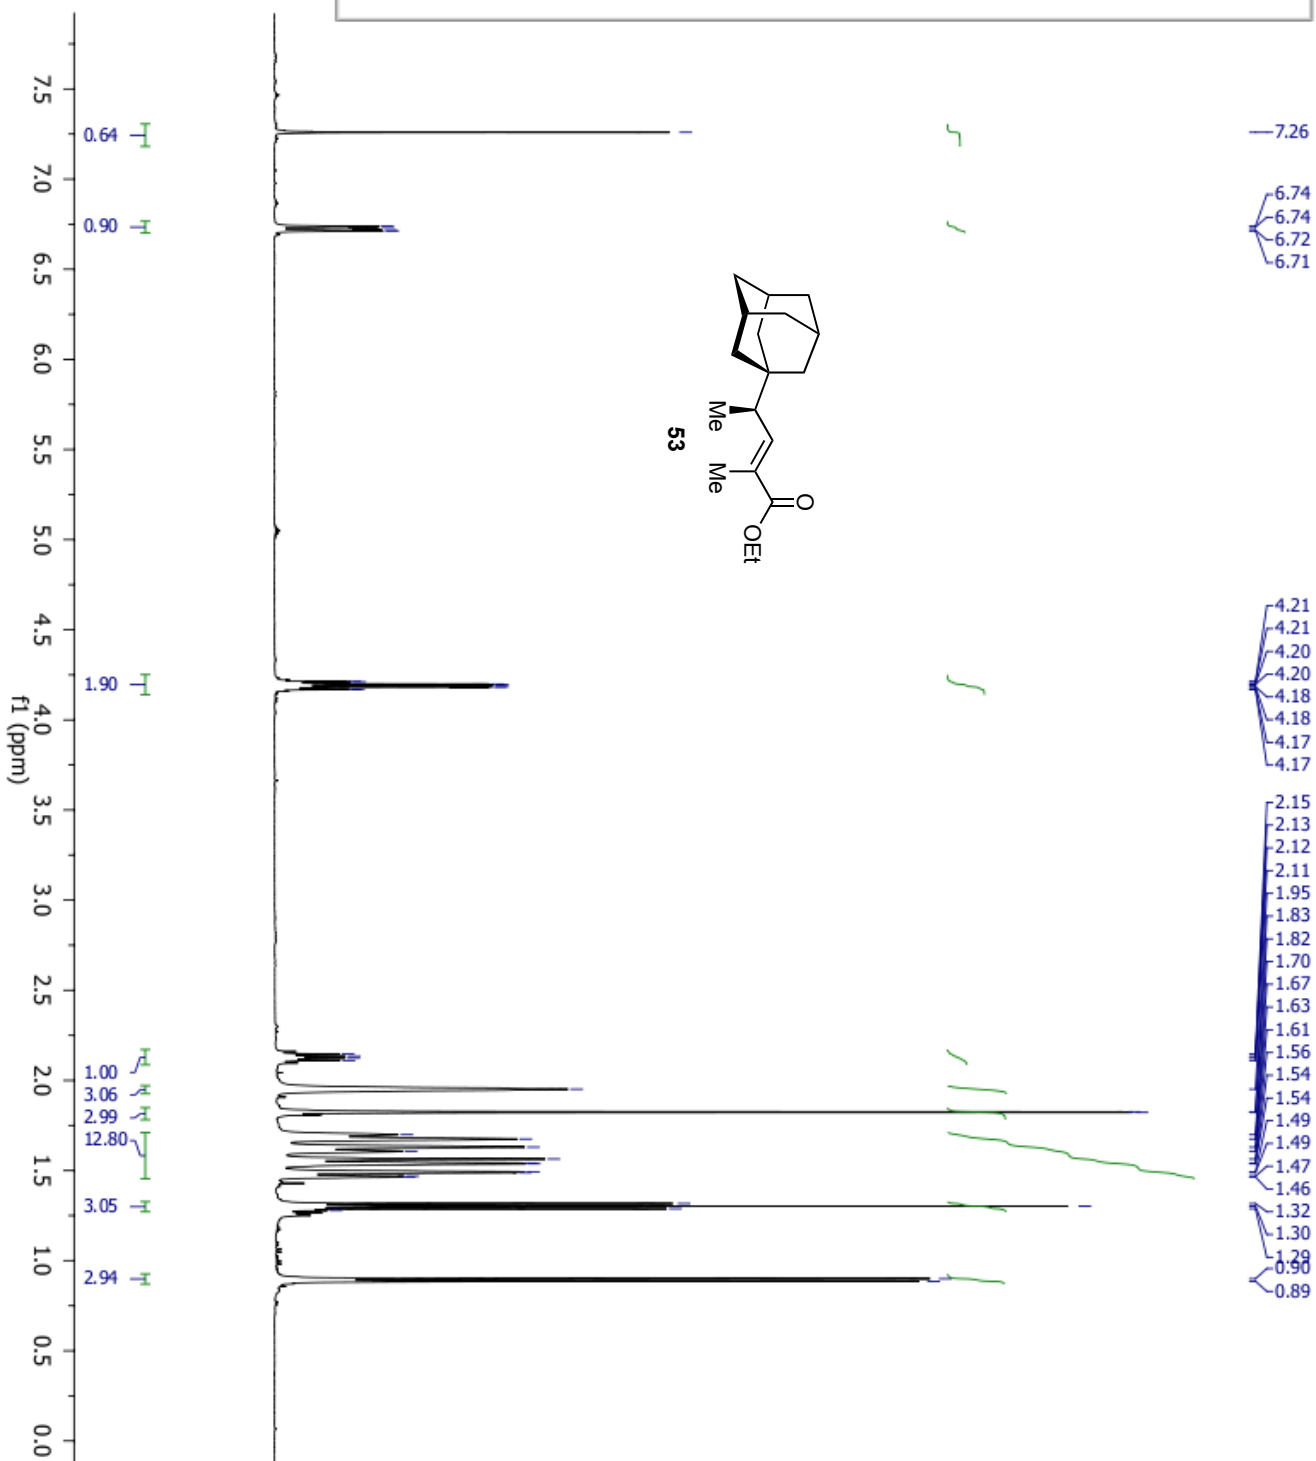

| Parameter                    | Value                                            |
|------------------------------|--------------------------------------------------|
| 1 Data File Name             | E:/ NMR Spectra/ 500-1/ 36/ f1                   |
| 2 Title                      | 500-1                                            |
| 3 Comment                    | 97/ 10/ 17, #5, 122.5 mg                         |
| 4 Origin                     | UXNMR, Bruker<br>Analytische Messtechnik<br>GmbH |
| 5 Owner                      | ajurkew                                          |
| 6 Site                       |                                                  |
| 7 Spectrometer               | spect                                            |
| 8 Author                     |                                                  |
| 9 Solvent                    | CDCl3                                            |
| 10 Temperature               | 300.0                                            |
| 11 Pulse Sequence            | zgdc                                             |
| 12 Number of Scans           | 600                                              |
| 13 Receiver Gain             | 8192                                             |
| 14 Relaxation Delay          | 4.0000                                           |
| 15 Pulse Width               | 8.0000                                           |
| 16 Acquisition Time          | 1.5000                                           |
| 17 Acquisition Date          | 2011-02-28T09:56:14                              |
| 18 Modification Date         | 2011-03-02T09:29:26                              |
| 19 Spectrometer<br>Frequency | 125.76                                           |
| 20 Spectral Width            | 37594.0                                          |
| 21 Lowest<br>Frequency       | -9398.2                                          |
| 22 Nucleus                   | 13C                                              |
| 23 Acquired Size             | 56390                                            |
| 24 Spectral Size             | 131072                                           |

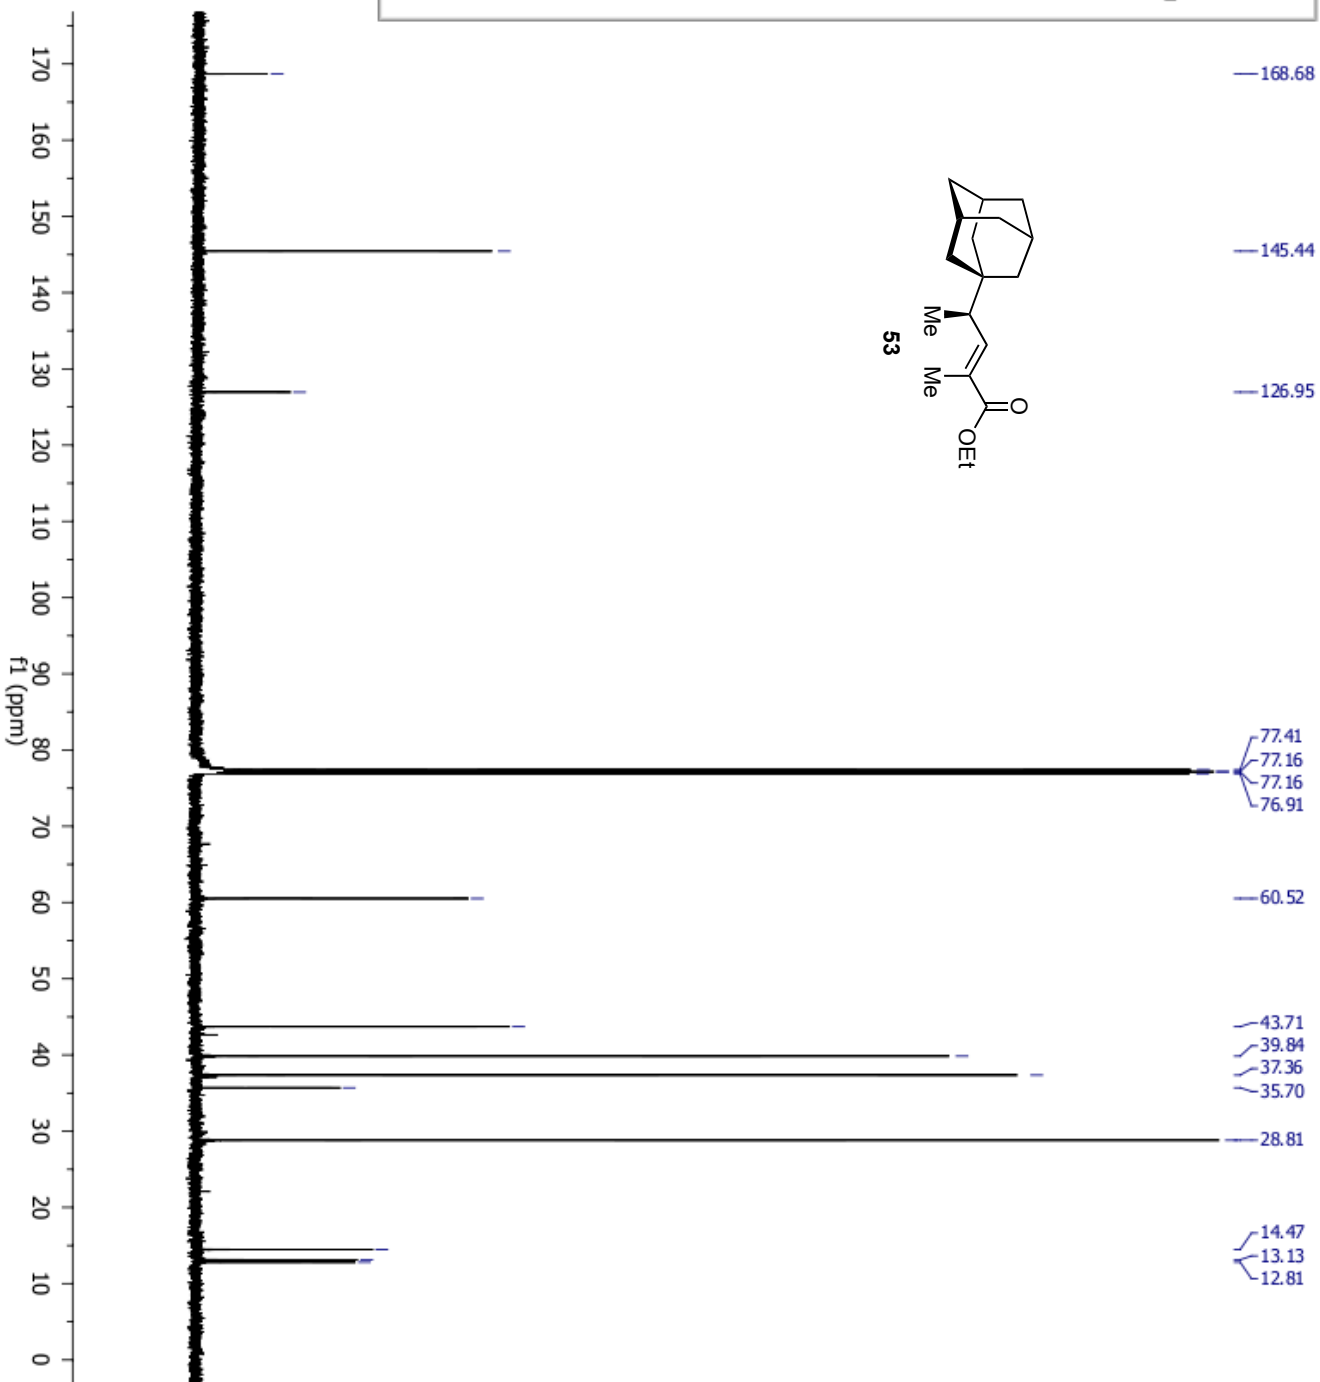

| Parameter                 | Value                                      |
|---------------------------|--------------------------------------------|
| 1 Data File Name          | E:/ NMR Spectra/ 500-2/ 92/ f1             |
| 2 Title                   | 500-2                                      |
| 3 Comment                 |                                            |
| 4 Origin                  | UXNMR, Bruker Analytische Messtechnik GmbH |
| 5 Owner                   | root                                       |
| 6 Site                    |                                            |
| 7 Spectrometer            | spect                                      |
| 8 Author                  |                                            |
| 9 Solvent                 | CDCl3                                      |
| 10 Temperature            | 294.9                                      |
| 11 Pulse Sequence         | zg                                         |
| 12 Number of Scans        | 32                                         |
| 13 Receiver Gain          | 32                                         |
| 14 Relaxation Delay       | 10.0000                                    |
| 15 Pulse Width            | 8.0000                                     |
| 16 Acquisition Time       | 2.9999                                     |
| 17 Acquisition Date       | 2011-03-08T05:50:27                        |
| 18 Modification Date      | 2011-03-08T12:50:30                        |
| 19 Spectrometer Frequency | 499.87                                     |
| 20 Spectral Width         | 10000.0                                    |
| 21 Lowest Frequency       | -2018.3                                    |
| 22 Nucleus                | <sup>1</sup> H                             |
| 23 Acquired Size          | 29999                                      |
| 24 Spectral Size          | 65536                                      |

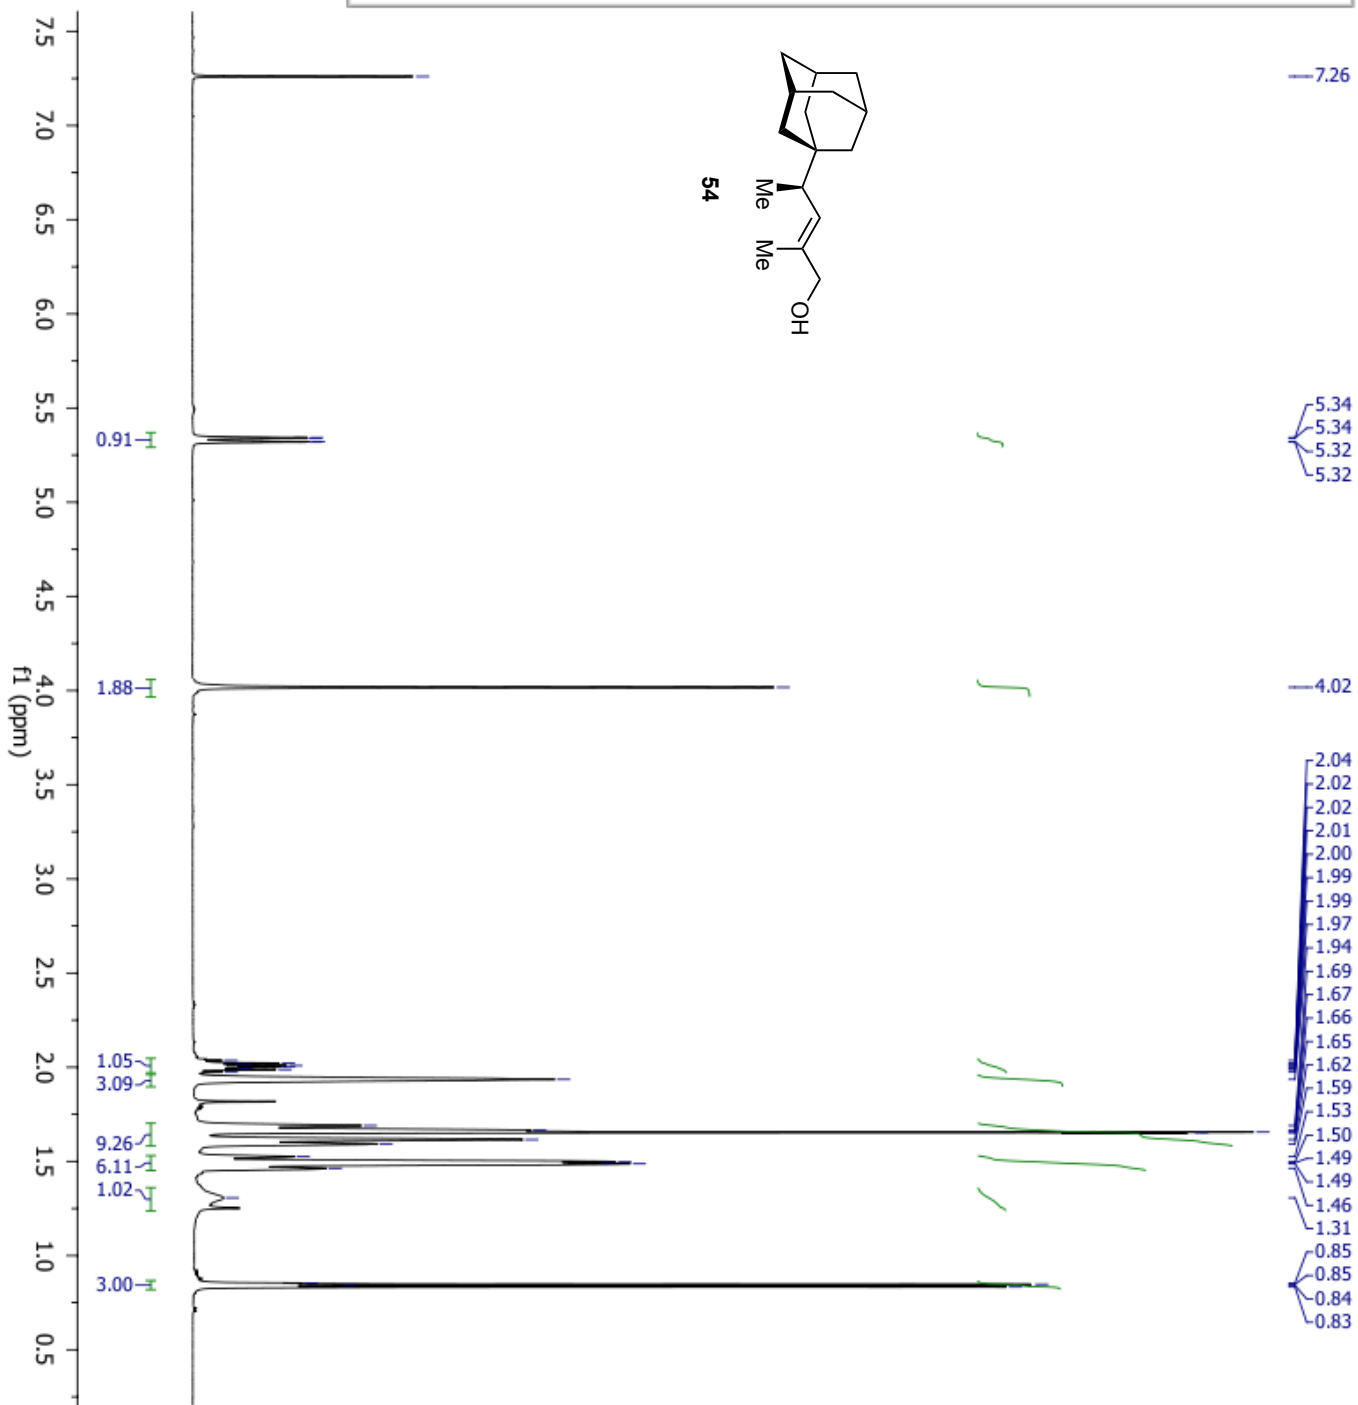

| Parameter                    | Value                                            |
|------------------------------|--------------------------------------------------|
| 1 Data File Name             | E:/46/ fid                                       |
| 2 Title                      | E:                                               |
| 3 Comment                    |                                                  |
| 4 Origin                     | UXNMR, Bruker<br>Analytische Messtechnik<br>GmbH |
| 5 Owner                      | Jschwans                                         |
| 6 Site                       |                                                  |
| 7 Spectrometer               | spect                                            |
| 8 Author                     |                                                  |
| 9 Solvent                    | CDCl3                                            |
| 10 Temperature               | 300.0                                            |
| 11 Pulse Sequence            | zgdc                                             |
| 12 Number of Scans           | 600                                              |
| 13 Receiver Gain             | 8192                                             |
| 14 Relaxation Delay          | 3.0000                                           |
| 15 Pulse Width               | 8.0000                                           |
| 16 Acquisition Time          | 1.5000                                           |
| 17 Acquisition Date          | 2011-03-15T08:26:07                              |
| 18 Modification Date         | 2011-03-15T07:37:30                              |
| 19 Spectrometer<br>Frequency | 125.77                                           |
| 20 Spectral Width            | 37594.0                                          |
| 21 Lowest<br>Frequency       | -9398.1                                          |
| 22 Nucleus                   | 13C                                              |
| 23 Acquired Size             | 56390                                            |
| 24 Spectral Size             | 131072                                           |

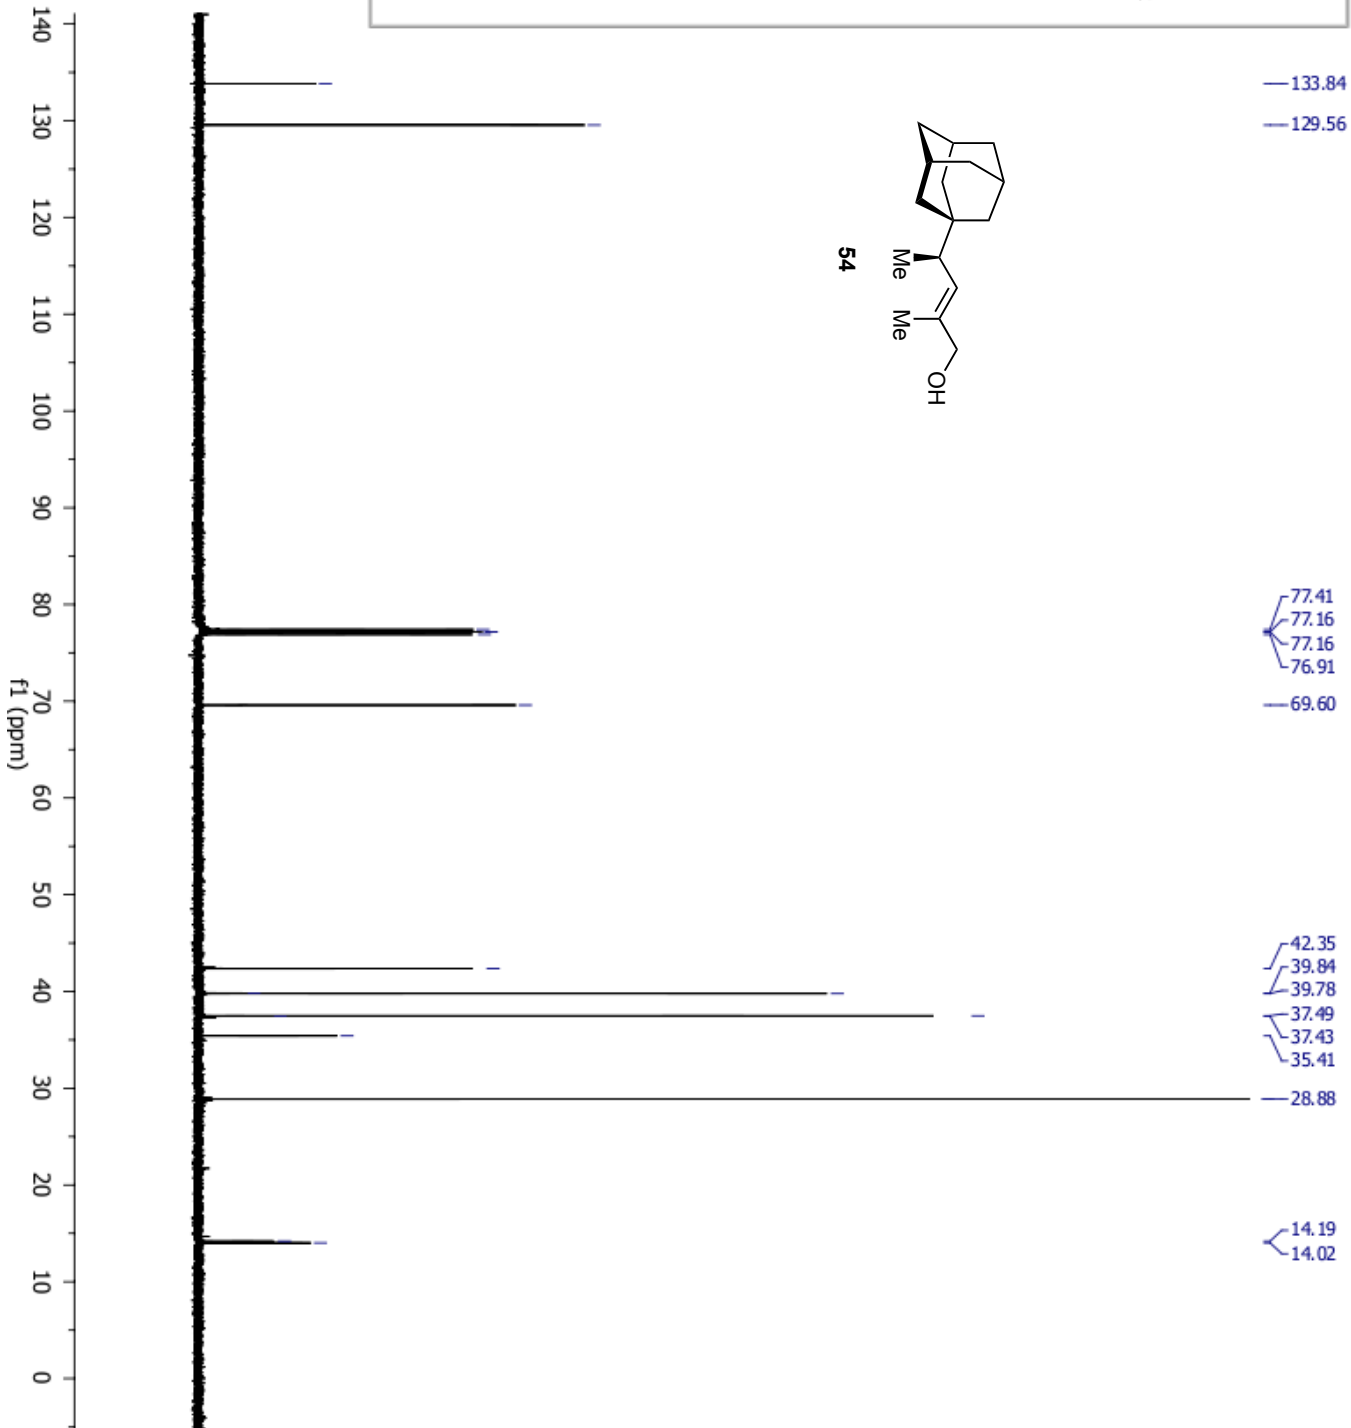

| Parameter                 | Value                                            |
|---------------------------|--------------------------------------------------|
| 1 Data File Name          | E:/ all nmr/ AM 5001/ 48/ f1d                    |
| 2 Title                   | AM                                               |
| 3 Origin                  | UXNMR, Bruker<br>Analytische Messtechnik<br>GmbH |
| 4 Owner                   | jschwans                                         |
| 5 Spectrometer            | spect                                            |
| 6 Temperature             | 300.0                                            |
| 7 Pulse Sequence          | zg                                               |
| 8 Number of Scans         | 16                                               |
| 9 Receiver Gain           | 256                                              |
| 10 Relaxation Delay       | 10.0000                                          |
| 11 Pulse Width            | 9.0000                                           |
| 12 Acquisition Time       | 3.0000                                           |
| 13 Acquisition Date       | 2011-03-16T13:31:00                              |
| 14 Modification Date      | 2011-04-19T14:55:30                              |
| 15 Spectrometer Frequency | 500.13                                           |
| 16 Spectral Width         | 8012.8                                           |
| 17 Lowest Frequency       | -1519.3                                          |
| 18 Nucleus                | <sup>1</sup> H                                   |
| 19 Acquired Size          | 24038                                            |
| 20 Spectral Size          | 65536                                            |

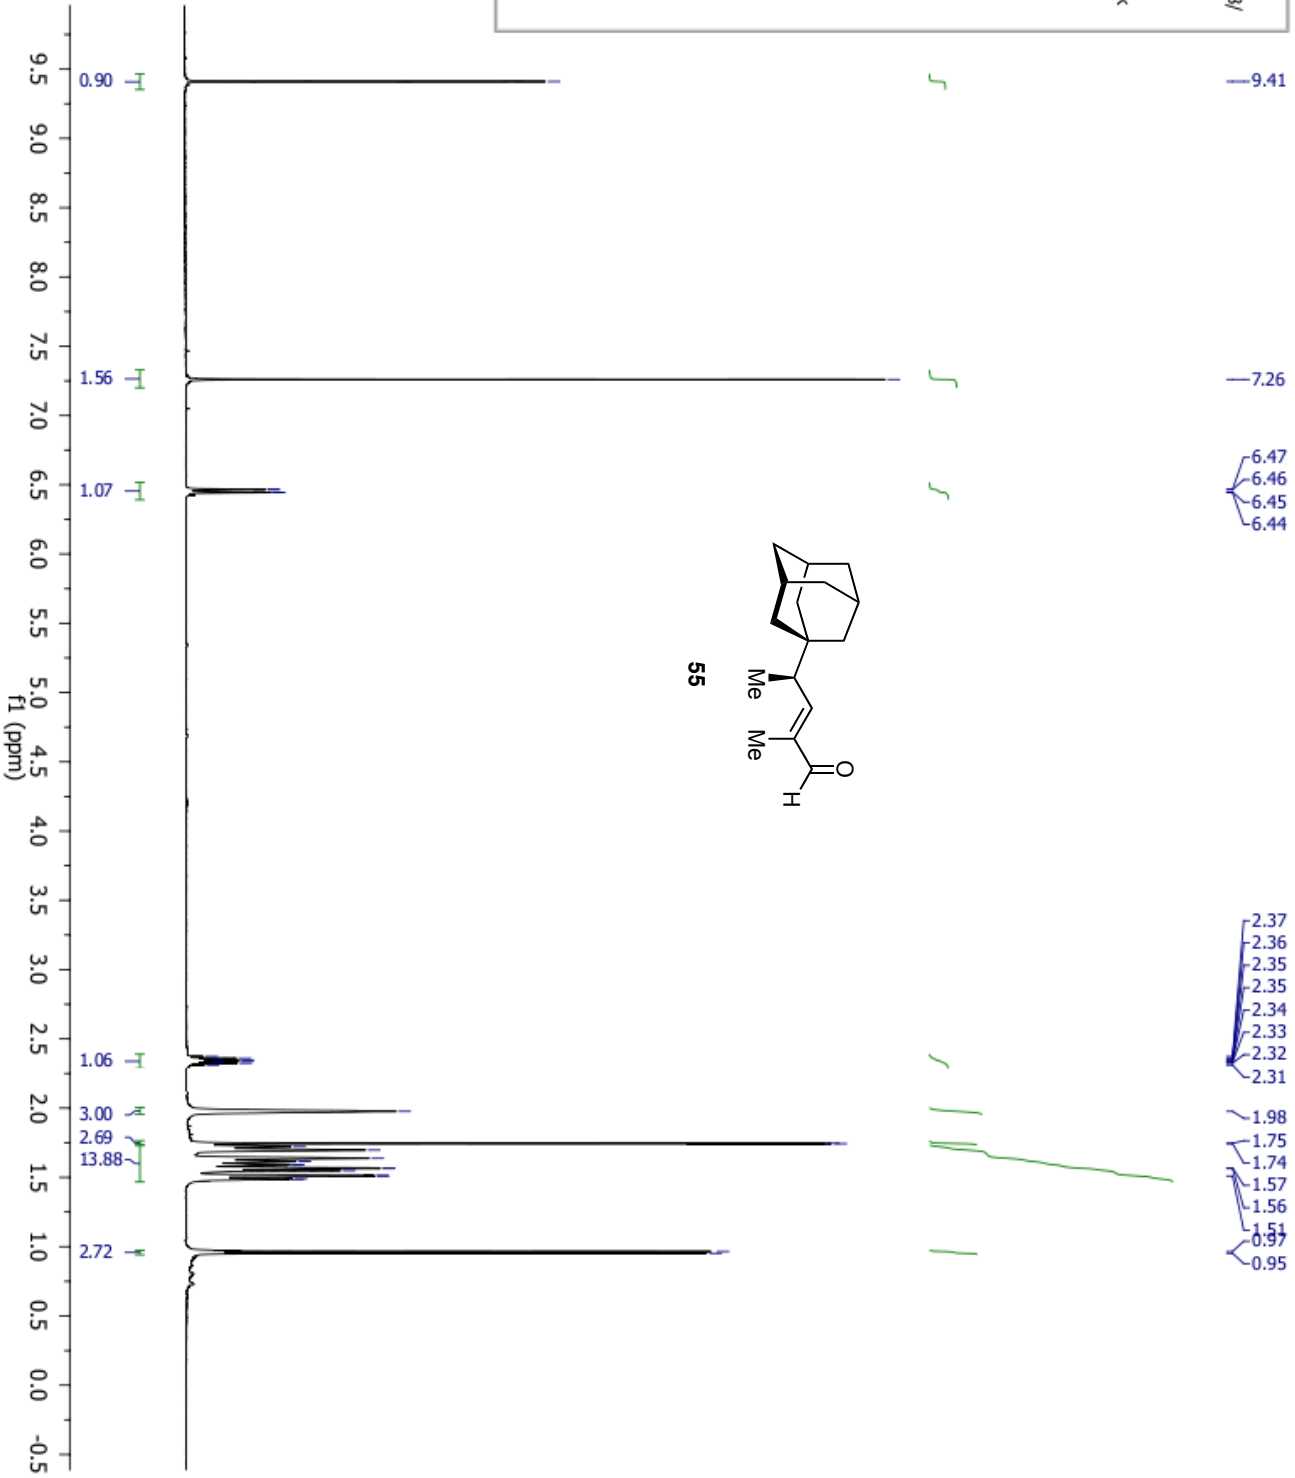



| Parameter                 | Value                                      |
|---------------------------|--------------------------------------------|
| 1 Data File Name          | E:/all nmr/AM 5001/ 50/ fid                |
| 2 Title                   | AM                                         |
| 3 Origin                  | UXNMR, Bruker Analytische Messtechnik GmbH |
| 4 Owner                   | jschwans                                   |
| 5 Spectrometer            | spect                                      |
| 6 Temperature             | 300.0                                      |
| 7 Pulse Sequence          | zgdc                                       |
| 8 Number of Scans         | 650                                        |
| 9 Receiver Gain           | 8192                                       |
| 10 Relaxation Delay       | 3.0000                                     |
| 11 Pulse Width            | 8.0000                                     |
| 12 Acquisition Time       | 1.5000                                     |
| 13 Acquisition Date       | 2011-03-16T18:41:00                        |
| 14 Modification Date      | 2011-04-19T14:55:36                        |
| 15 Spectrometer Frequency | 125.76                                     |
| 16 Spectral Width         | 37594.0                                    |
| 17 Lowest Frequency       | -9397.7                                    |
| 18 Nucleus                | <sup>13</sup> C                            |
| 19 Acquired Size          | 56390                                      |
| 20 Spectral Size          | 131072                                     |

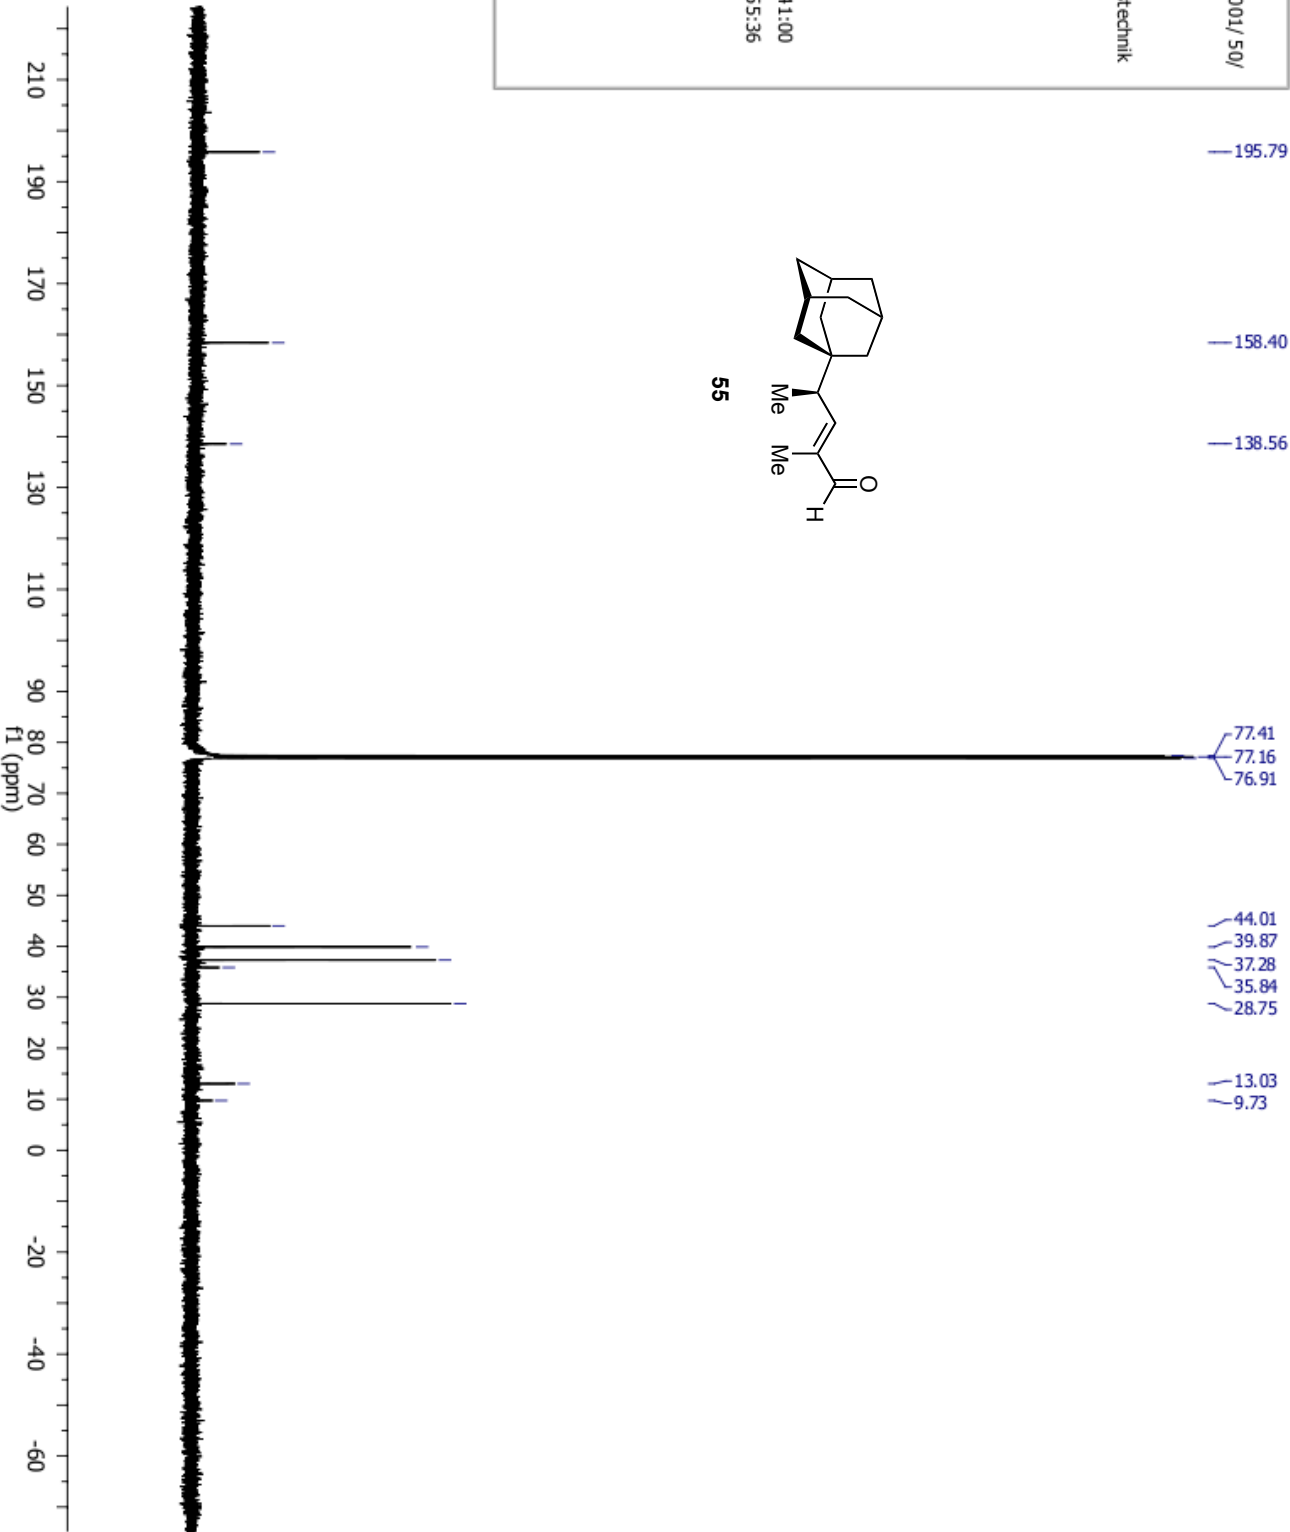

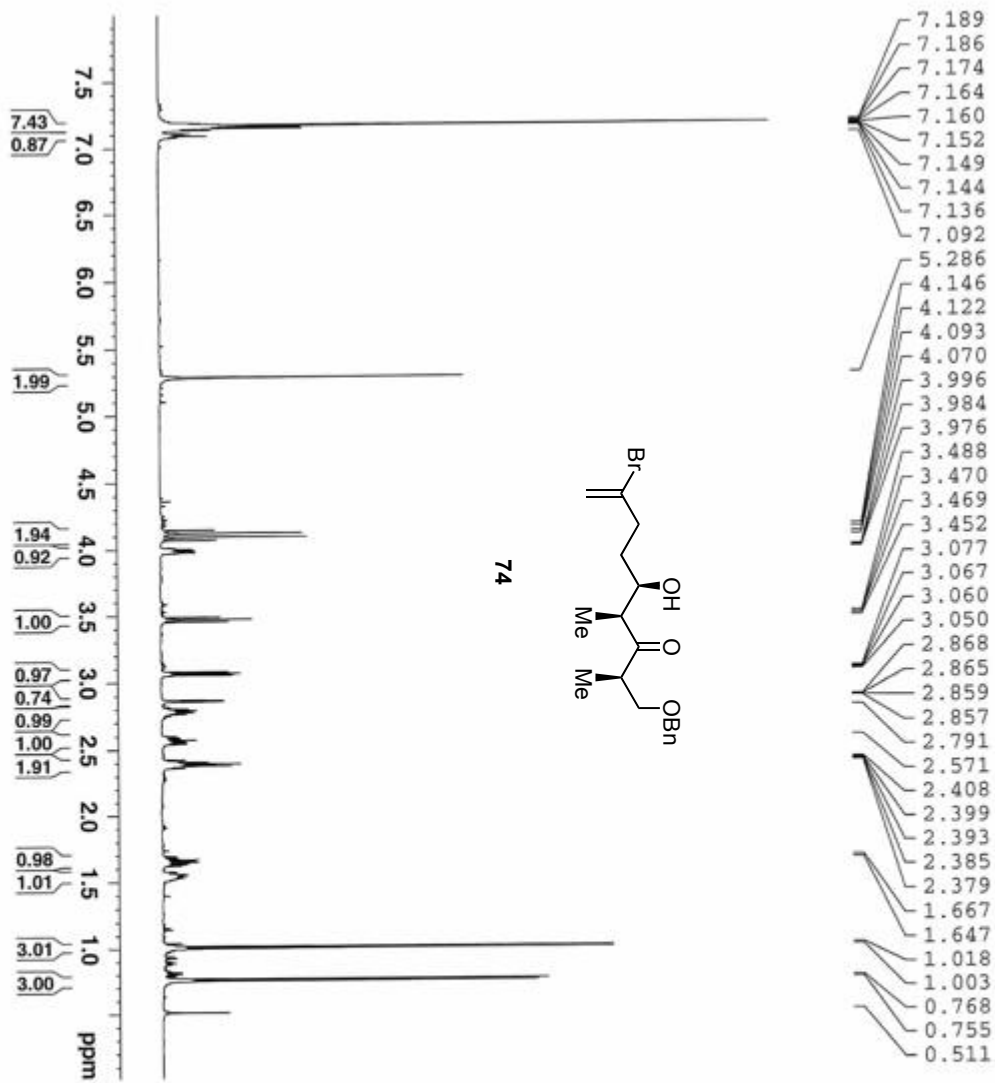

```

Current Data Parameters
NAME      B1138
EXPNO    1
PROCNO   1

F2 - Acquisition Parameters
Date_    20071118
Time     17.36
INSTRUM spect
PROBHD   5 mm PAQNP 1H/
PULPROG zg
TD       44998
SOLVENT  CDCl3
NS       8
DS       0
SWH      7500.000 Hz
FIDRES   0.166674 Hz
AQ       2.9999166 sec
RG       328
DM       66.667 um
DE       71.43 um
TE       295.1 K
D1       1.00000000 sec
TD0      1

===== CHANNEL f1 =====
NUC1      1H
P1       12.00 usec
PL1      0.00 dB
SFO1     500.135009 MHz

F2 - Processing parameters
SI       16384
SF       500.1300446 MHz
WDW      EM
SSB      0
LB       0.30 Hz
GB       0
PC       1.00

```

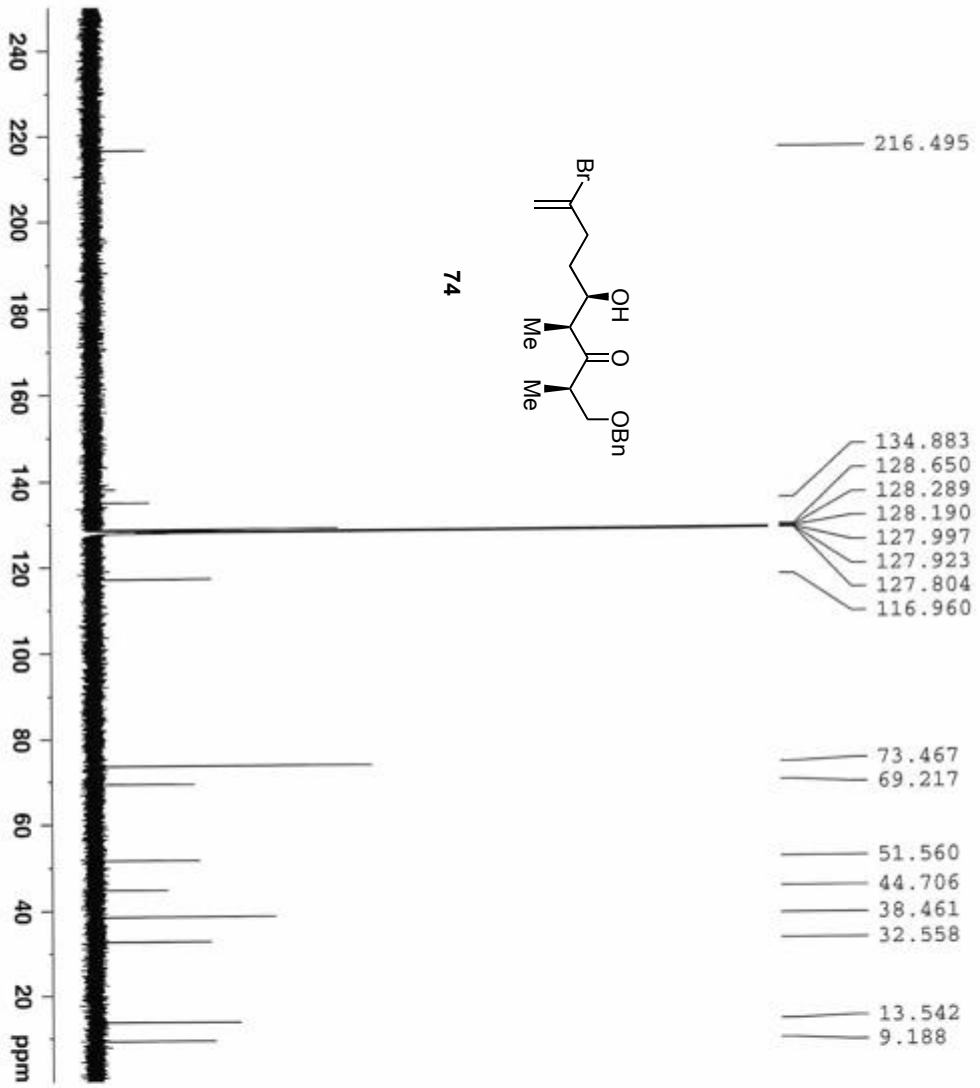

```

Current Data Parameters
NAME          at1238
EXPNO        2
PROCNO       1

F2 - Acquisition Parameters
Date_        20071118
Time         17.50
INSTRUM     spect
PROBHD      5 mm PAQNP 1H/
PULPROG     zgpg
TD           65786
SOLVENT     CDCl3
NS           100
DS           4
SWH          32894.738 Hz
FIDRES      0.360026 Hz
AQ           0.9999972 sec
RG           2050
RG           15.200 us
DE           6.00 us
TE           295.6 K
D1           3.00000000 sec
d11          0.03000000 sec
DELTA       2.90000010 sec
TD0         1

***** CHANNEL f1 *****
NUC1         13C
P1           8.00 us
PL1         1.00 dB
SFO1        125.7728799 MHz

***** CHANNEL f2 *****
CPDPRG2     waltz16
NUC2         1H
PC1902      80.00 us
PC12        16.50 dB
PC13        17.00 dB
PC2         0.00 dB
SFO2        500.1325006 MHz

F2 - Processing parameters
SI          131072
SF          125.7577644 MHz
WDW         EM
SSB         0
LB          0.30 Hz
GB          0
PC          1.40
  
```

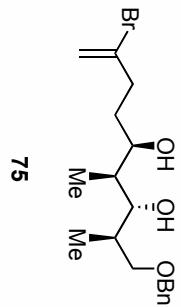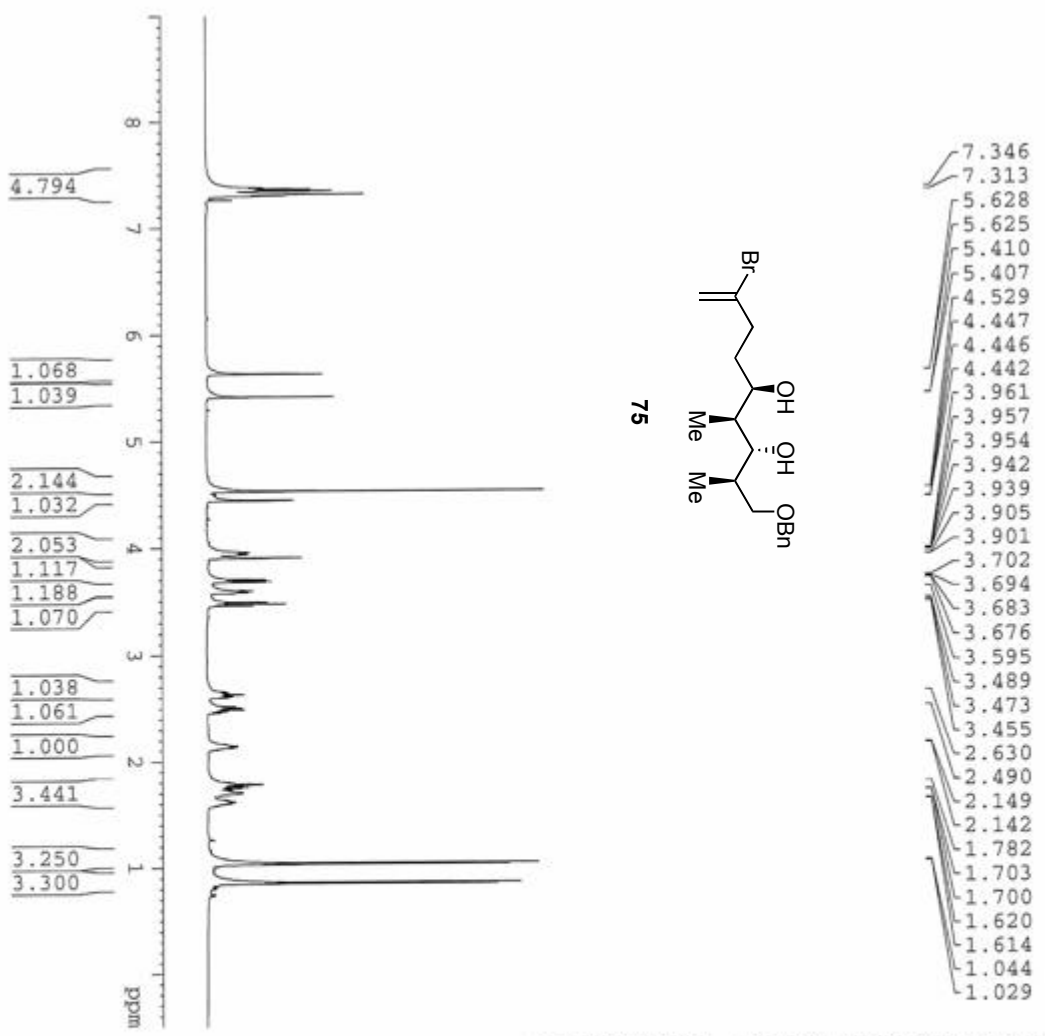

- 7.346
- 7.313
- 5.628
- 5.625
- 5.410
- 5.407
- 4.529
- 4.447
- 4.446
- 4.442
- 3.961
- 3.957
- 3.954
- 3.942
- 3.939
- 3.905
- 3.901
- 3.702
- 3.694
- 3.683
- 3.676
- 3.595
- 3.489
- 3.473
- 3.455
- 2.630
- 2.490
- 2.149
- 2.142
- 1.782
- 1.703
- 1.700
- 1.620
- 1.614
- 1.044
- 1.029

```

NAME          SE110062010
EXPNO         1
PROCNO        1
Date_         20101006
Time          14.49
INSTRUM       spect
PROBHD        5 mm QNP 1H
PULPROG       zgpg30
TD            45044
SOLVENT       Acetone
NS            8
DS            0
SWH           7507.507 Hz
FIDRES        0.166871 Hz
AQ           2.939804 sec
RG            66.62
DM           66.620 usec
DE           300.0 K
TE           300.0 K
D1           3.00000000 sec
PC           1.00

***** CHANNEL f1 *****
NUC1          1H
P1           9.00 usec
PL1          0.00 dB
SFO1         500.135009 MHz
SI          65536
SF           500.1300136 MHz
WDW          EM
SSB          0
LB           0.30 Hz
GB           0
PC           1.00
  
```

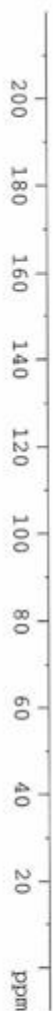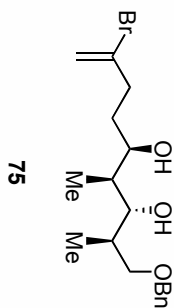

- 137.127
- 134.542
- 128.500
- 127.943
- 127.686
- 116.732
  
- 82.409
- 75.930
- 73.642
- 69.880
  
- 38.262
- 38.147
- 35.470
- 32.817
  
- 13.725
- 11.368

```

NAME          #110062010
EXPNO         2
PROCNO       1
Date_        20101006
Time         14.54
INSTRUM      spect
PROBHD       5 mm QNP 1H
PULPROG      zgpg
TD            65536
SOLVENT      CDCl3
NS           96
DS           4
SWH          30303.031 Hz
FIDRES       0.560013 Hz
AQ           0.9999830 sec
RG           16384
WDW          16.560 usec
DE           7.50 usec
TE           300.0 K
D1           3.00000000 sec
d11          0.03000000 sec

***** CHANNEL f1 *****
NUC1          13C
P1           8.00 usec
PL1          3.00 dB
SFO1         125.7715724 MHz

***** CHANNEL f2 *****
CPDPRG2      waltz16
NUC2          1H
PCPD2        90.00 usec
PL2          120.00 dB
PL12         20.00 dB
SFO2         500.1318000 MHz
SI           32768
SF           125.7578015 MHz
WDW          EM
SSB          0
LB           1.00 Hz
GB           0
PC           1.40
  
```

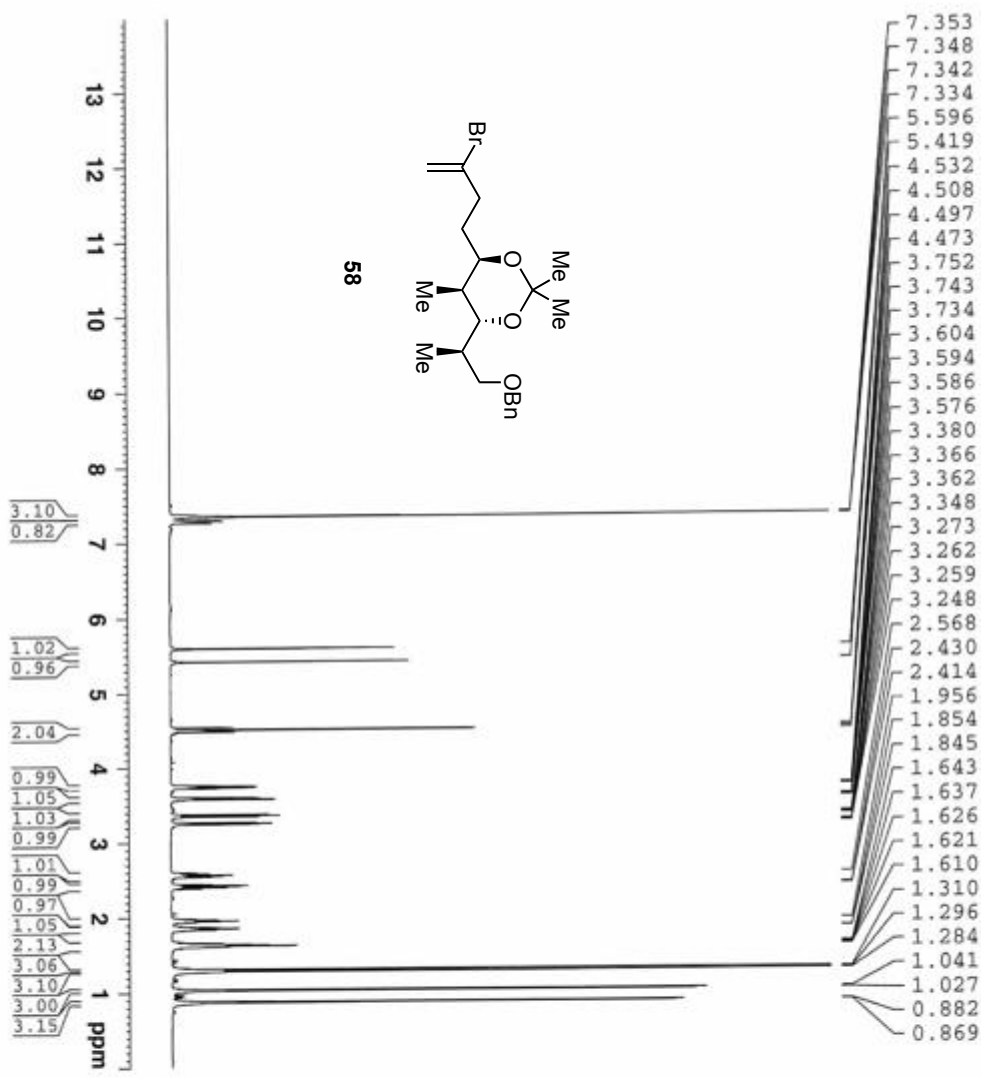

```

Current Data Parameters
NAME          st1244
EXPNO         1
PROCNO        1

F2 - Acquisition Parameters:
Date_         20071129
Time          12.21
INSTRUM       spect
PROBHD        5 mm PABBO BB-
PULPROG       zg
TD            44398
SOLVENT       CDCl3
NS            8
DS            0
SWH           7500.000 Hz
FIDRES       0.166674 Hz
AQ           2.9999186 sec
RG           32
RG           66.667 usec
DE           6.00 usec
TE           295.0 K
D1           1.00000000 sec
TD0          1

===== CHANNEL f1 =====
NUC1          1H
P1           11.80 usec
PL           0.00 dB
SFO1         500.1335009 MHz

F2 - Processing Parameters:
SI           16384
SF           500.1300073 MHz
WDW          EM
SSB          0
LB           0.30 Hz
GB           0
PC           1.00
  
```

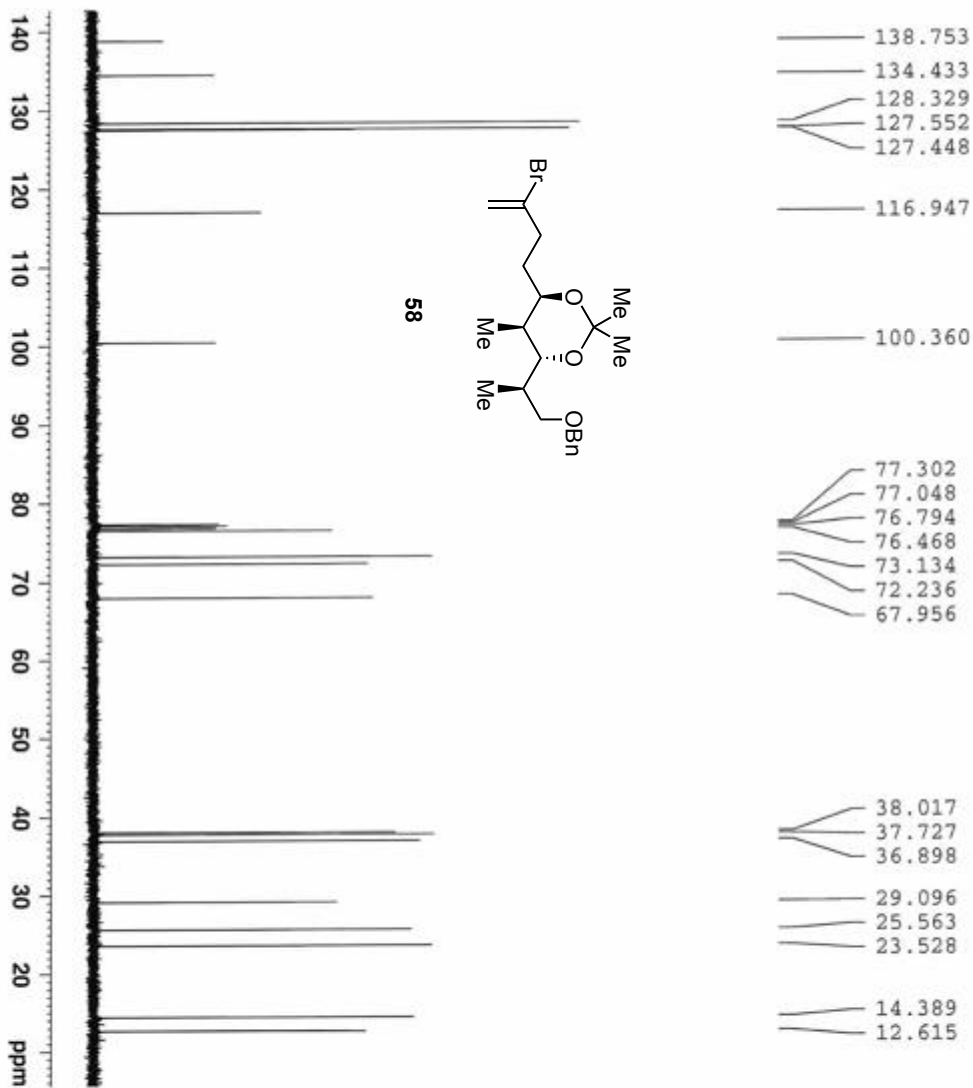

```

Current Data Parameters
NAME          8c1244
EXPNO        2
PROCNO       1
PROCNO       1

F2 - Acquisition Parameters
Date_        20071129
Time         12.28
INSTRUM     spect
PROBHD      5 mm WBBO BB-
PULPROG     zgpg
TD           65786
SOLVENT     CDCl3
NS           32
DS           0
SWH          32894.738 Hz
FIDRES      0.500026 Hz
AQ           0.999972 sec
RG           2050
IW           15.200 use
DE           6.00 use
TE           295.7 K
DL           3.00000000 sec
d11          0.03000000 sec
DELTA       2.90000010 sec
TD0         1

===== CHANNEL f1 =====
NUC1         13C
P1           7.50 use
PL1          0.50 dB
SFO1        125.7728799 MHz

===== CHANNEL f2 =====
CPDPRG2     waltz16
NUC2         1H
PCPD2       80.00 use
PL12        17.60 dB
PL13        18.00 dB
PL2         -2.00 dB
SFO2        500.1325006 MHz

F2 - Processing parameters
SI           131072
SF           125.7577890 MHz
WDW          EM
SSB          0
LB           0.30 Hz
GB           0
PC           1.40
  
```

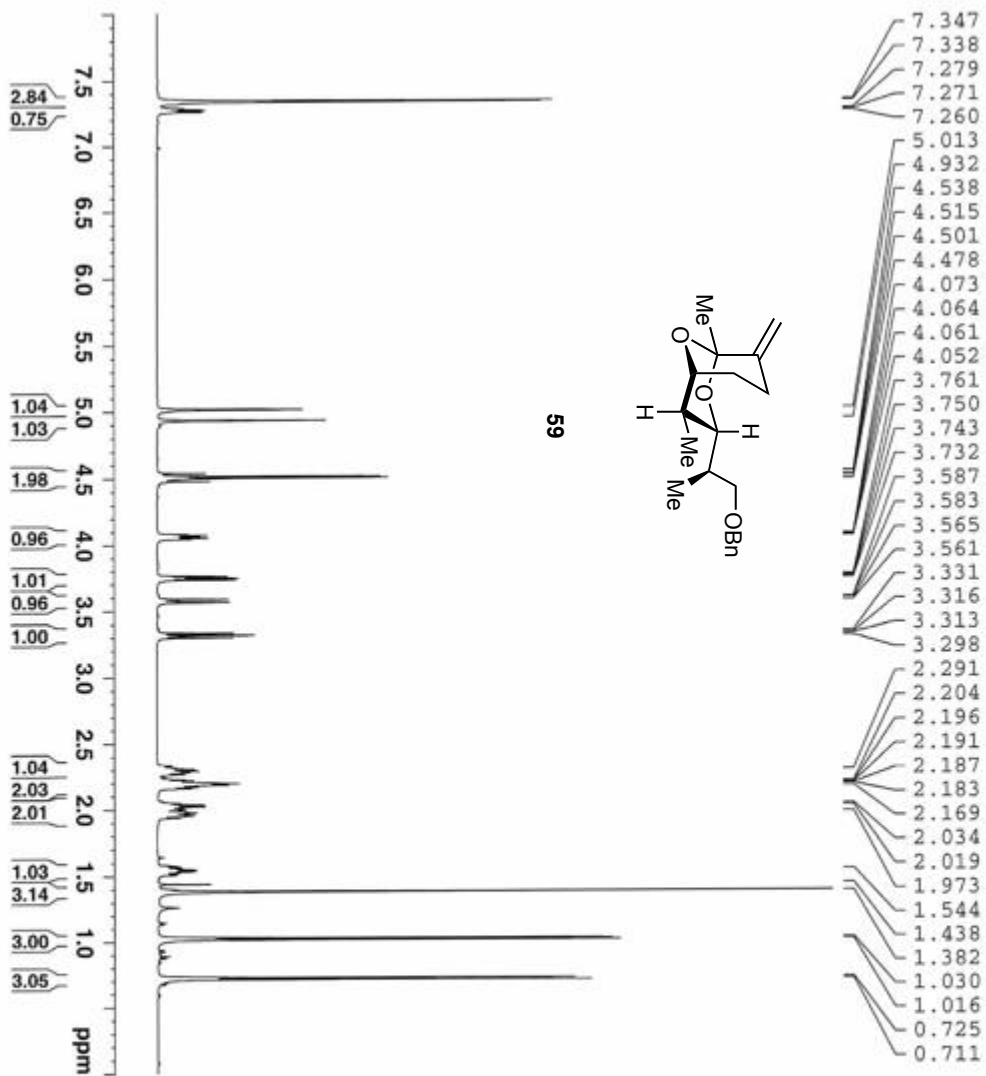

59

```

Current Data Parameters
NAME          sel1250
EXPNO        1
PROCNO       1

F2 - Acquisition Parameters:
Date_        20071204
Time         18:29
INSTRUM     spect
PROBHD      5 mm PAQNP 1H/
PULPROG     zg
TD           44998
SOLVENT     CDCl3
NS           8
DS           0
SMAH        7500.000 Hz
FIDRES      0.166574 Hz
AQ           2.9999166 sec
RG           50.8
DM           56.667 us
DE           71.43 us
TE           295.0 K
D1           1.00000000 sec
TD0          1

===== CHANNEL f1 =====
NUC1         1H
P1           12.00 us
PL1          0.00 dB
SFO1         500.1335009 MHz

F2 - Processing parameters
SI           16384
SF           500.1300084 MHz
WDW          EM
SSB          0
LB           0.30 Hz
GB           0
PC           1.00
  
```



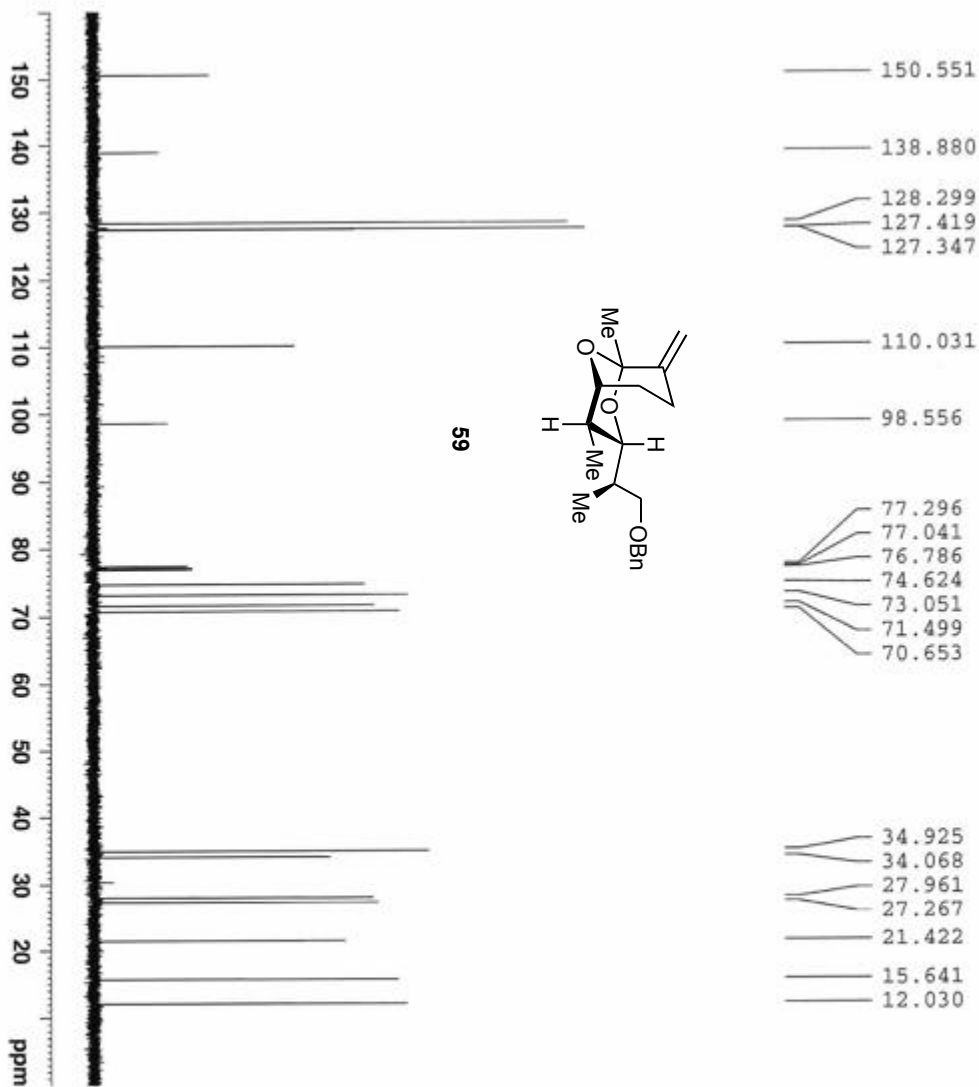

```

Current Data Parameters
NAME          sc1250
EXPNO        2
PROCNO       1
-----
F2 - Acquisition Parameters
Date_        20071204
Time         18.38
INSTRUM     spect
PROBHD      5 mm PMAONE IH/
PULPROG     zgpg
TD           65786
SOLVENT     CDCl3
NS           32
DS           4
SWH          32894.738 Hz
FIDRES       0.500026 Hz
AQ           0.9999972 se
RG           2050
DW           15.200 us
DE           6.00 us
TE           295.6 K
D1           3.00000000 se
d11          0.01000000 se
DELTA       2.90000010 se
TD0          1
-----
***** CHANNEL f1 *****
NUC1         13C
P1           8.00 us
PL1         -1.00 dB
SFO1        125.7728799 MHz
-----
***** CHANNEL f2 *****
CPDPRG2     waltz16
NUC2         1H
PCPD2       80.00 us
PL12        16.50 dB
PL13        17.00 dB
PL2         0.00 dB
SFO2        500.1325006 MHz
-----
F2 - Processing Parameters
SI           131072
SF           125.7577890 MHz
WDW          EM
SSB          0
LB           0.30 Hz
GB           0
PC           1.40

```

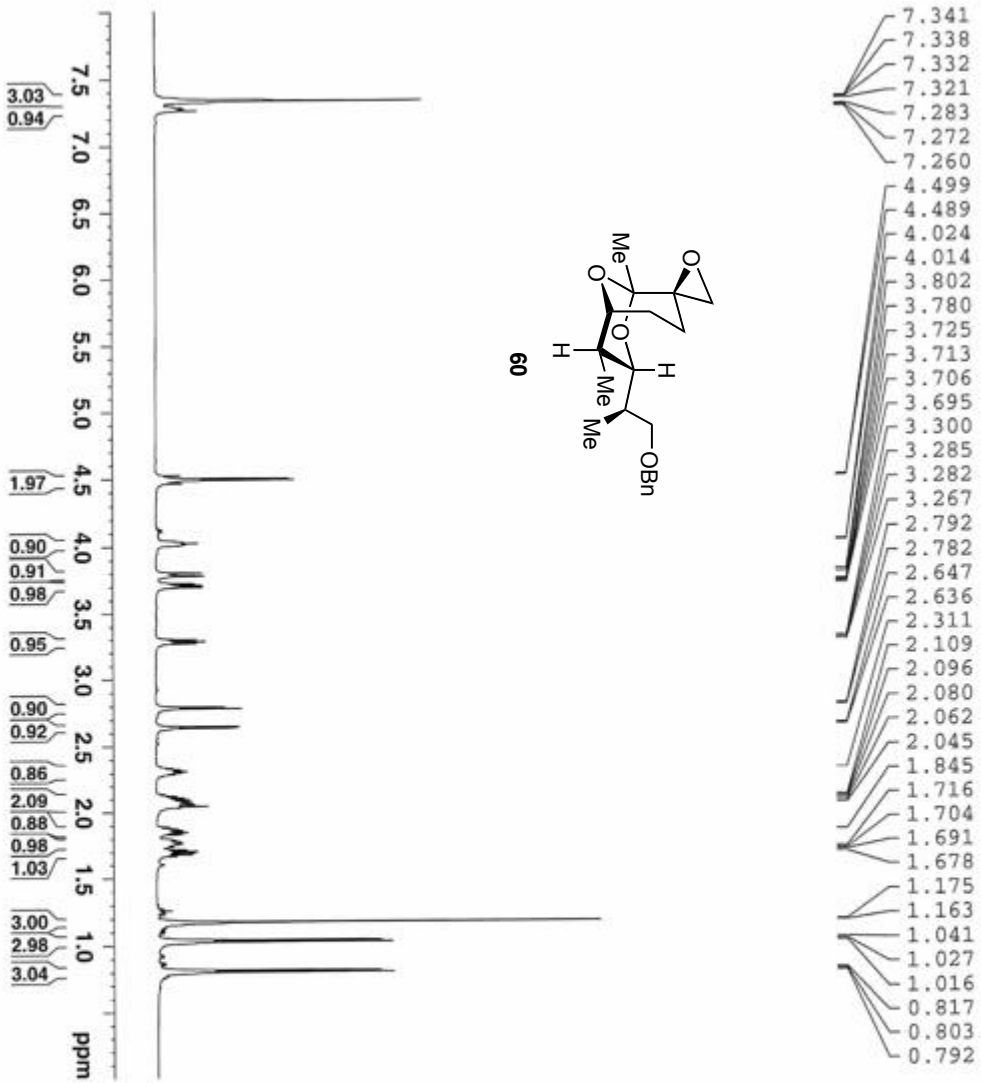

```

Current Data Parameters
NAME          6E1257
EXPNO         1
PROCNO       1
----- Acquisition Parameters -----
Date_         20071210
Time          10.44
INSTRUM      spect
PROBHD       5 mm PABNP 1H/
PULPROG      zg
TD           44998
SOLVENT      CDCl3
NS           8
DS           0
SMR          7500.000 Hz
FIDRES       0.166674 Hz
AQ           2.999166 sec
RG           128
DW           66.667 usec
DE           71.43 usec
TE           294.2 K
D1           1.00000000 sec
TD0          1
----- CHANNEL f1 -----
NUC1          1H
P1           12.00 usec
PL           0.00 dB
SFO1         500.135009 MHz
----- Processing parameters -----
SI           16384
SF           500.1300085 MHz
WDW          EM
SSB          0
LB           0.30 Hz
GB           0
PC           1.00

```

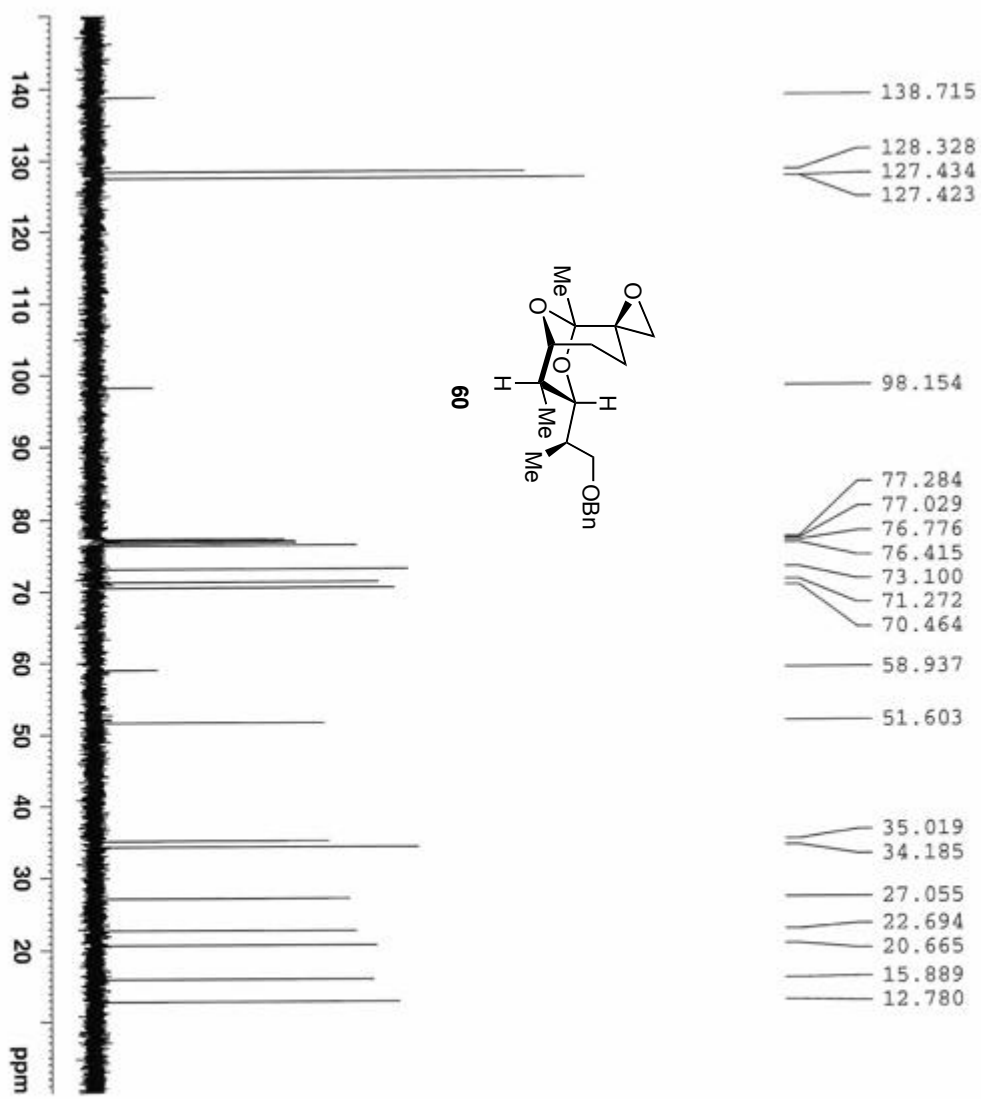

```

Current Data Parameters
NAME          rcl257
EXTRNO       2
PROCNO       1

F2 - Acquisition Parameters
Date_        20071210
Time         10.31
INSTRUM     spect
PROBHD      5 mm QNP1H/
PULPROG     zgpg
TD          65786
SOLVENT     CDCl3
NS          64
DS          4
SMH         32894.738 Hz
FIDRES      0.500626 Hz
AQ          0.9999872 sec
RG          2050
EW          15.200 us
DE          6.00 us
TE          295.3 K
D1          3.00000000 sec
d11         0.03000000 sec
DELTA       2.90000010 sec
TDO         1

===== CHANNEL f1 =====
NUC1         13C
P1           8.00 us
PL1          1.00 dB
SFO1        125.7728799 MHz

===== CHANNEL f2 =====
CPDPRG2     waltz16
NUC2         1H
PCPD2       80.00 us
PL12        16.50 dB
PL13        17.00 dB
PL2         0.00 dB
SFO2        500.1325006 MHz

F2 - Processing parameters
SI          131072
SF          125.7577890 MHz
WDW         EM
SSB         0
LB          0.30 Hz
GB          0
PC          1.40

```

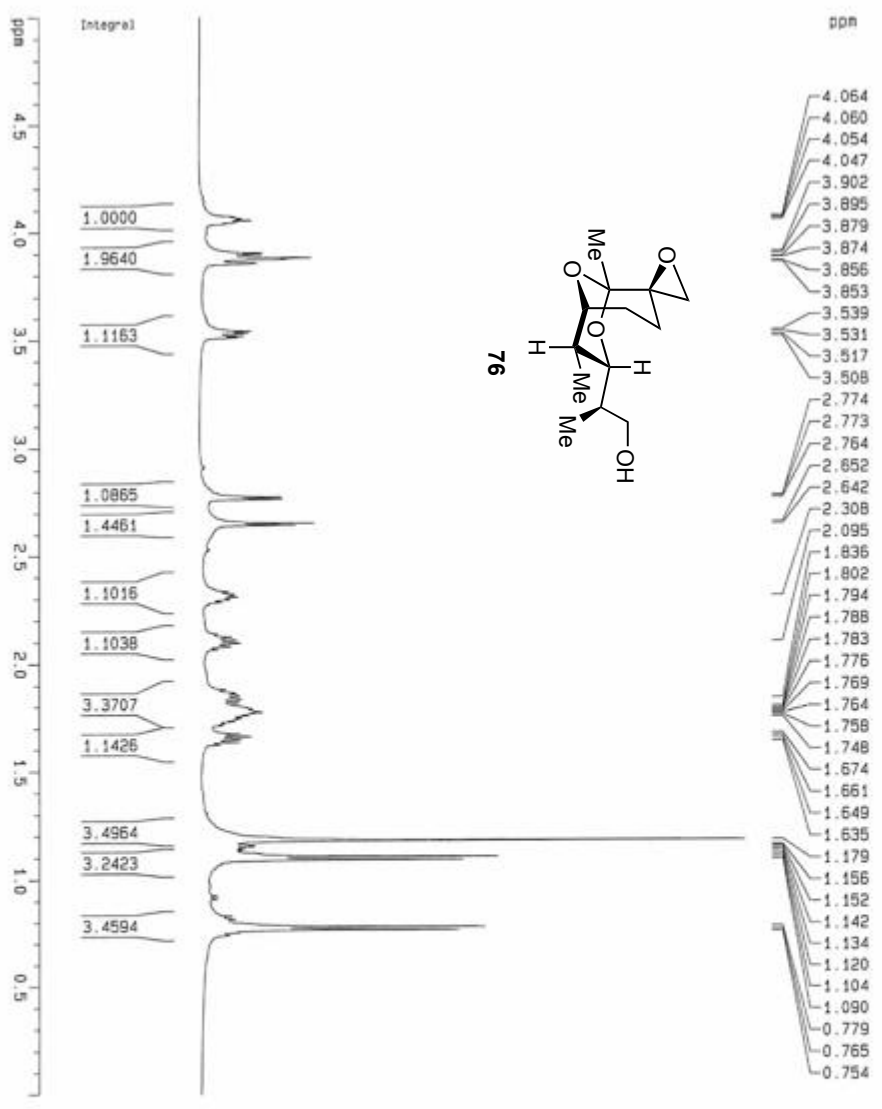

Current Data Parameters  
 NAME: S13212  
 EXPNO: 1  
 PROCNO: 1

F2 - Acquisition Parameters  
 Date\_: 20100820  
 Time: 11.34  
 INSTRUM: spect  
 PROBDW: 5.00 MHz  
 PULPROG: zgpg30  
 TD: 65536  
 SOLVENT: Acetone  
 NS: 8  
 DS: 0  
 SWH: 7507.507 Hz  
 FIDRES: 0.166671 Hz  
 AQ: 2.9999004 sec  
 RG: 16  
 CW: 65.500 uSAC  
 DE: 4.50 uSAC  
 TE: 300.0 K  
 O1: 3.00000000 sec

\*\*\*\*\* CHANNEL f1 \*\*\*\*\*  
 NUC1: 1H  
 P1: 9.00 uSAC  
 FL1: 0.00 dB  
 SF01: 500.136299 MHz

F2 - Processing parameters  
 S1: 65536  
 SF: 500.130122 MHz  
 NQW: EN  
 SSB: 0  
 LB: 0.30 Hz  
 GB: 0  
 PC: 1.00

10 MHz plot parameters  
 CK: 20.00 cm  
 FJP: 5.000 ppm  
 F1: 2500.05 Hz  
 F2P: 0.000 ppm  
 F2: 0.00 Hz  
 FREQM: 0.25000 MHz/cm  
 KHZM: 129.02650 Hz/cm

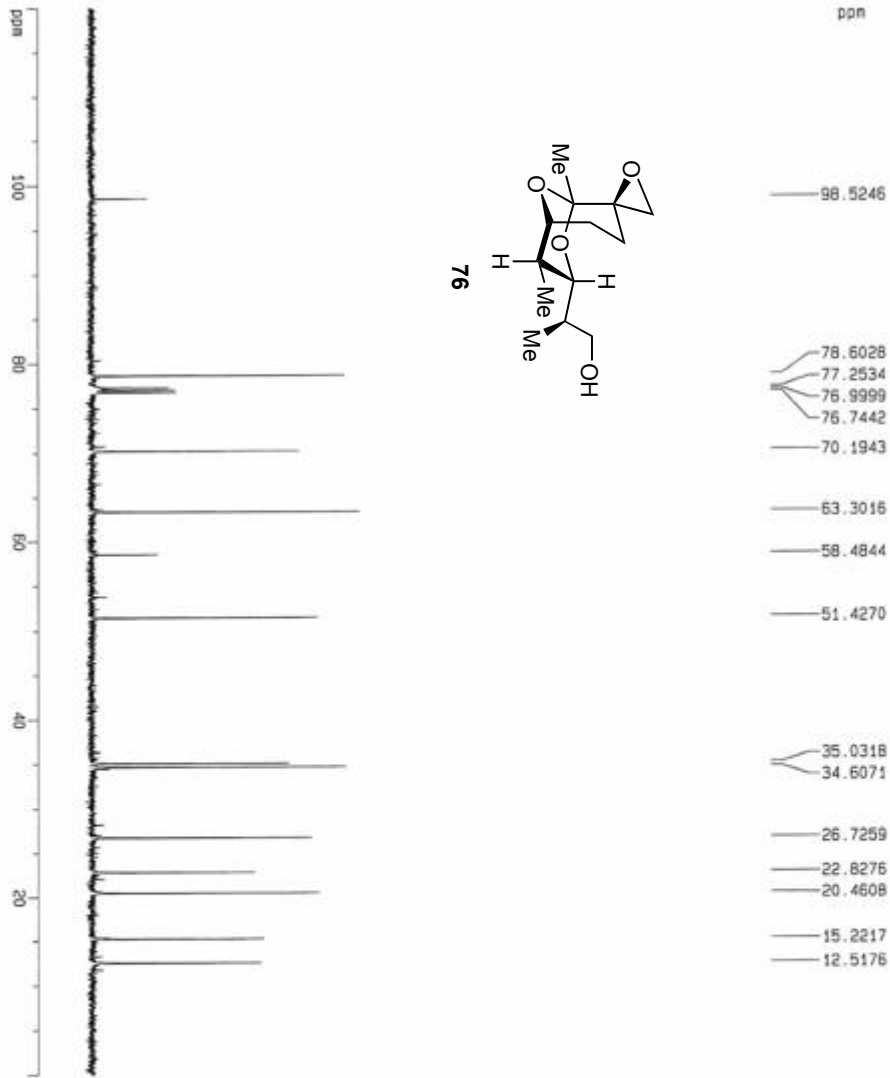

| Chemical Shift (ppm) |
|----------------------|
| 98.5246              |
| 78.6028              |
| 77.2534              |
| 76.9999              |
| 76.7442              |
| 70.1943              |
| 63.3016              |
| 58.4844              |
| 51.4270              |
| 35.0318              |
| 34.6071              |
| 26.7259              |
| 22.8276              |
| 20.4608              |
| 15.2217              |
| 12.5176              |

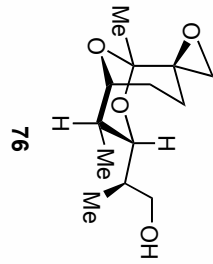

```

Current Data Parameters
NAME          1118152
EXPNO        2
PROCNO       1

F2 - Acquisition Parameters
Date_        20100400
Time         11.39
INSTRUM      spect
PROBHD       5 mm QNP 1H
PULPROG      zgpg
NUC1          13C
NUC2          13C
SOLVENT      CDCl3
NS            48
DS            4
SWH           30303.631 Hz
FIDRES       0.500013 Hz
AQ            0.9999830 sec
RG            16384
DW            16.500 usec
DE            7.50 usec
TE            300.0 K
D1            3.00000000 sec
d11           0.03000000 sec

***** CHANNEL f1 *****
NUC1          13C
P1            8.00 usec
PL1           3.00 dB
SFO1         125.7719724 MHz

***** CHANNEL f2 *****
CPDPRG2      waltz16
NUC2          13C
P2            90.00 usec
PL2           120.00 dB
PL12         20.00 dB
SFO2         500.1328000 MHz

F2 - Processing parameters
SI            32768
SF            125.7578000 MHz
KCM           EM
SSB           0
LB            1.00 Hz
GB            0
PC            1.40

5D NMR plot parameters
CX            20.00 cm
F1P           150.0000 ppm
F1            150950.94 Hz
F2P           0.0000 ppm
F2            0.00 Hz
PRPCHM       5.00000000 usec/cm
HZCM         754.54675 Hz/cm

```

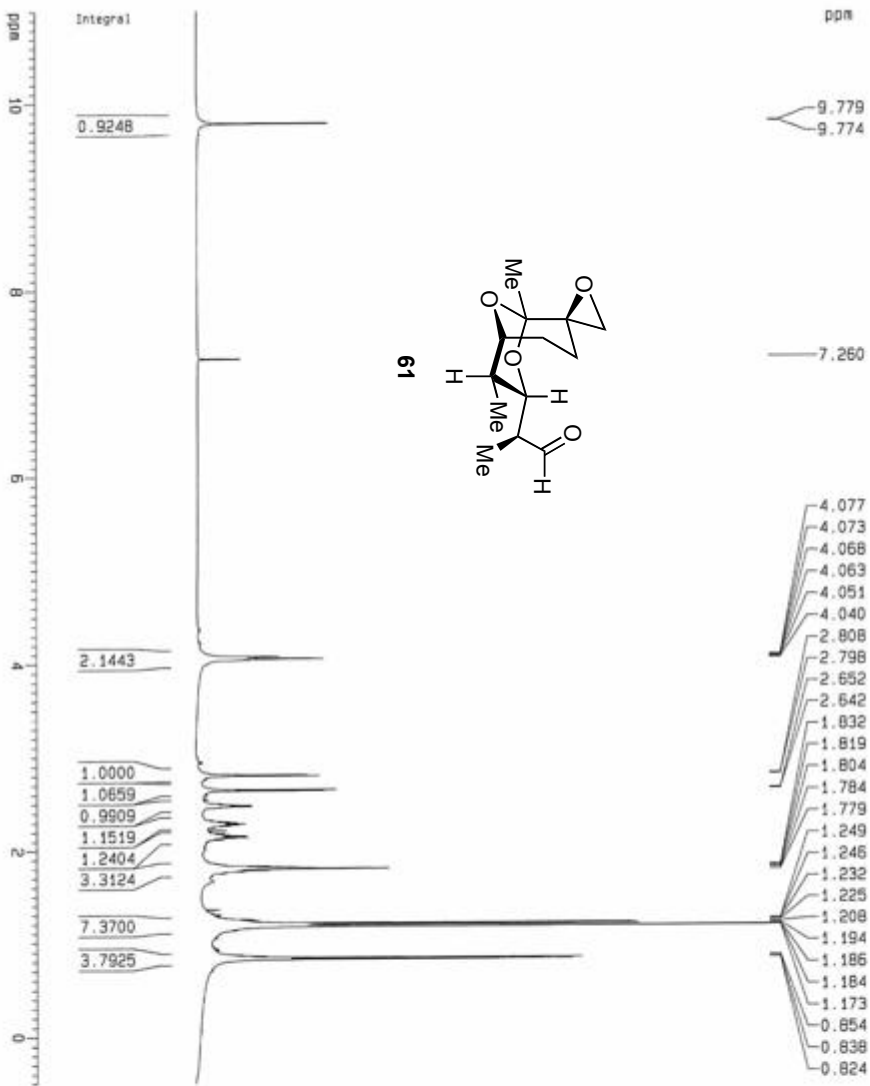

Current Data Parameters  
 NAME: 8132713  
 EXPNO: 1  
 PROCNO: 1

F2 - Acquisition Parameters  
 Date\_: 20100823  
 Time: 10.14  
 INSTRUM: spect  
 PROBNM: 5 mm QNP 1H  
 PULPROG: zg  
 TD: 40944  
 SOLVENT: Acetone  
 NS: 8  
 DS: 2  
 SWH: 7507.507 Hz  
 FIDRES: 0.166671 Hz  
 AQ: 2.9929804 sec  
 RG: 32  
 DM: 66.660 us/cr  
 DE: 4.50 us/cr  
 TE: 300.0 K  
 D1: 3.00000000 sec

\*\*\*\*\* CHANNEL f1 \*\*\*\*\*  
 NUC1: 1H  
 P1: 9.00 us/cr  
 PL1: 0.00 dB  
 SFO1: 500.136509 MHz

F2 - Processing parameters  
 S1: 69536  
 SF: 500.1300128 MHz  
 NDM: EM  
 SSB: 0  
 LB: 0.30 Hz  
 GB: 0  
 PC: 1.00

1D NMR plot parameters  
 CX: 20.00 cm  
 F1P: 11.000 ppm  
 F1: 5501.43 Hz  
 F2P: -0.500 ppm  
 F2: -250.07 Hz  
 FREQM: 0.57500 ppm/cm  
 HZCM: 287.57477 Hz/cm

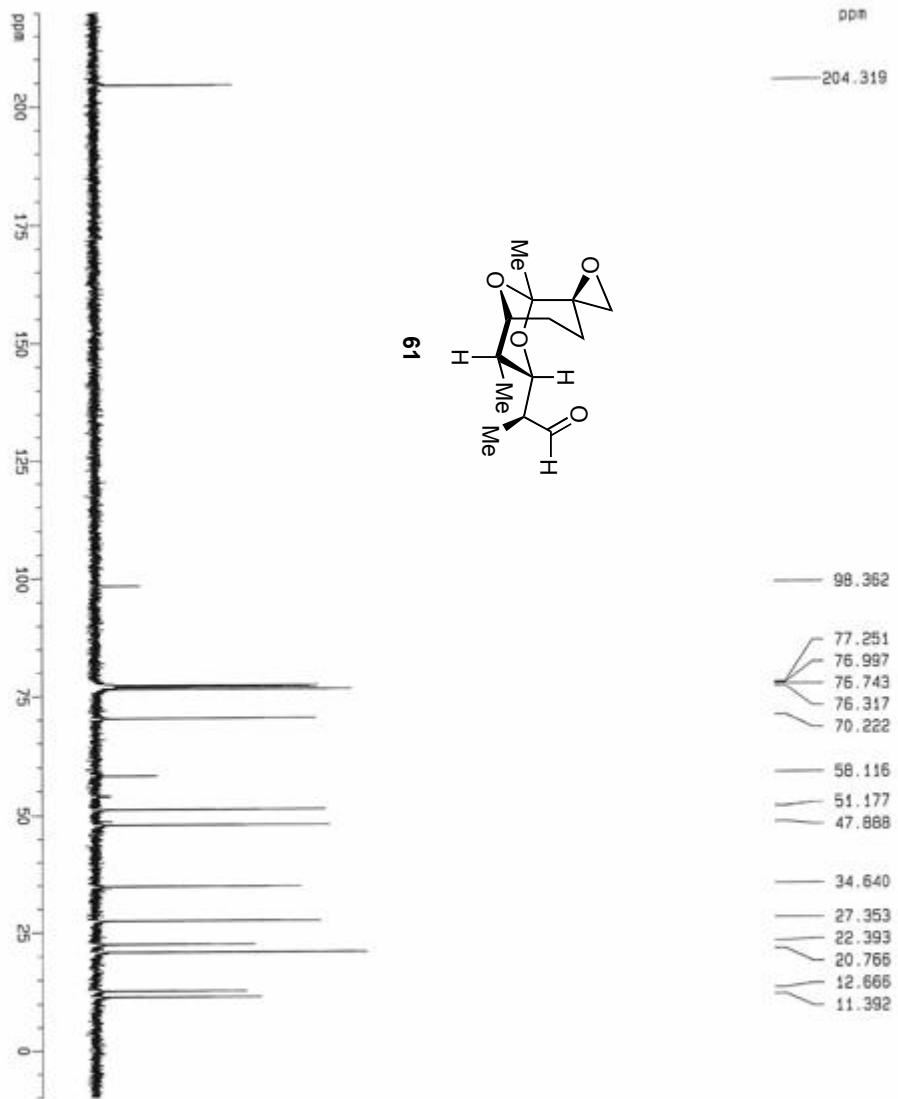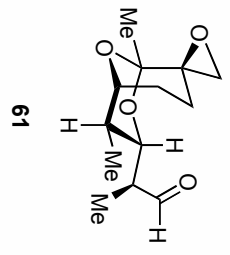

Current Data Parameters  
 NAME s113213  
 EXPNO 2  
 PROCNO 1

F2 - Acquisition Parameters  
 Date\_ 20180823  
 Time 10.19  
 INSTRUM spect  
 PROBRD 5 mm gpc 1H  
 PULPROG zgpg30  
 TD 65536  
 SOLVENT CDCl3  
 NS 100  
 DS 4  
 SWH 30303.031 Hz  
 FIDRES 0.500033 Hz  
 AQ 0.0999800 sec  
 RG 16384  
 DM 16.500 umsc  
 DE 7.50 umsc  
 TE 300.0 K  
 D1 3.00000000 sec  
 d11 0.03000000 sec

\*\*\*\*\* CHANNEL f1 \*\*\*\*\*  
 NUC1 13C  
 P1 8.00 umsc  
 PL1 3.00 dB  
 SFO1 125.7715724 MHz

\*\*\*\*\* CHANNEL f2 \*\*\*\*\*  
 ORPGM2 waltz16  
 MUX2 3H  
 PCPD2 90.00 umsc  
 P12 120.00 dB  
 PL12 20.00 dB  
 SFO2 500.1326000 MHz

F2 - Processing parameters  
 SI 32768  
 SF 125.7577650 MHz  
 KW 64  
 SSB 0  
 LB 1.00 Hz  
 GB 0  
 PC 1.40

1D NMR plot parameters  
 CX 20.00 cm  
 F1P 220.000 SPM  
 F1 27956.71 Hz  
 F2P -10.000 SPM  
 F2 -1267.58 Hz  
 PPMCK 11.50000 ppm/cm  
 HZCK 146.21472 Hz/cm

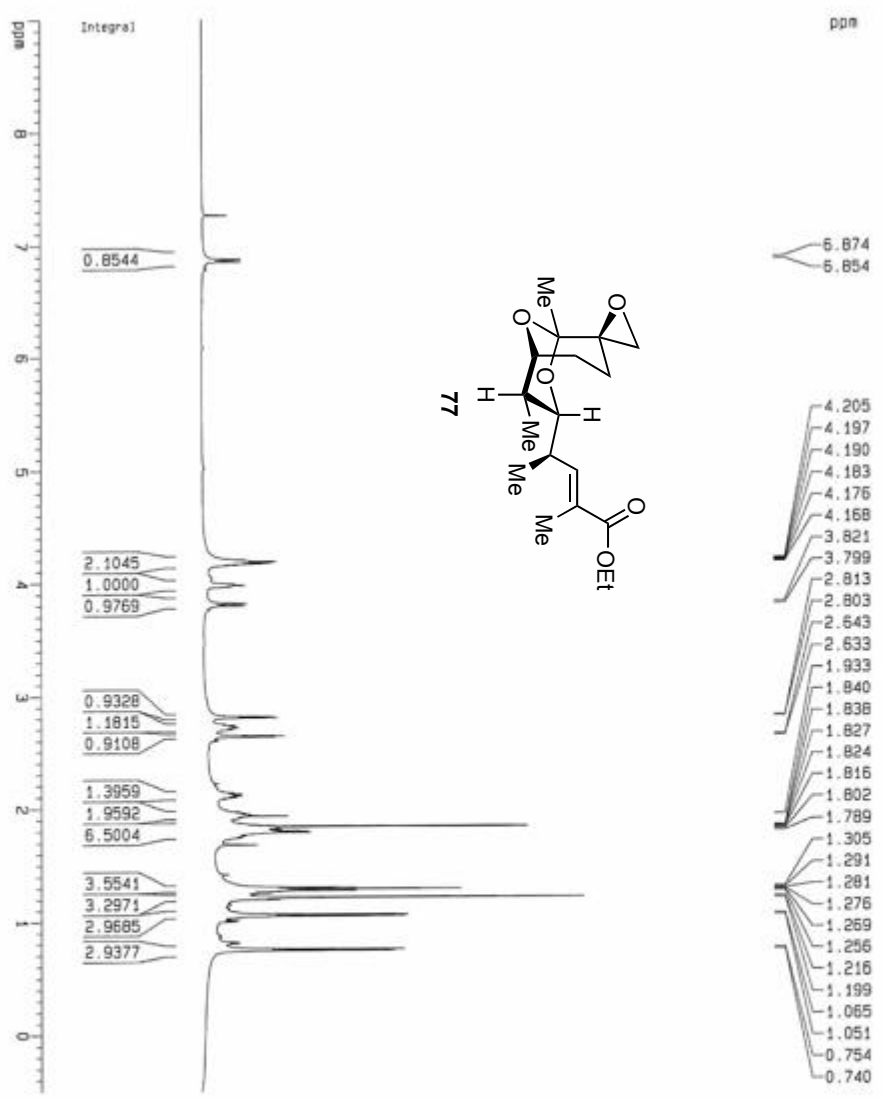

Current Data Parameters  
 NAME: 8113214  
 EXPNO: 1  
 F2PROCNO: 1

F2 - Acquisition Parameters  
 Date\_: 20100823  
 Time: 16.07  
 INSTRUM: spect  
 PROBRD: 5 mm QNP 1H  
 PULPROG: zg  
 TO: 45044  
 SOLVENT: Aceton  
 NS: 0  
 DS: 0  
 SWH: 7507.507 Hz  
 FIDRES: 0.166671 Hz  
 AQ: 2.8999804 sec  
 RG: 32  
 CW: 66.800 usec  
 DE: 4.50 usec  
 TE: 300.0 K  
 D1: 3.00000000 sec

\*\*\*\*\* CHANNEL f1 \*\*\*\*\*  
 NUC1: 1H  
 P1: 9.00 usec  
 PL1: 0.00 dB  
 SF01: 500.135009 MHz

F2 - Processing parameters  
 S1: 65036  
 SF: 500.1300120 MHz  
 NQW: EM  
 SSB: 0  
 LB: 0.30 Hz  
 GB: 0  
 PC: 1.00

1D NMR plot parameters  
 CX: 20.00 cm  
 F1P: 9.000 ppm  
 F1: 4501.17 Hz  
 F2P: -0.500 ppm  
 F2: -250.07 Hz  
 FREQC1: 0.47580 ppm/cm  
 FREQC2: 237.56175 Hz/cm



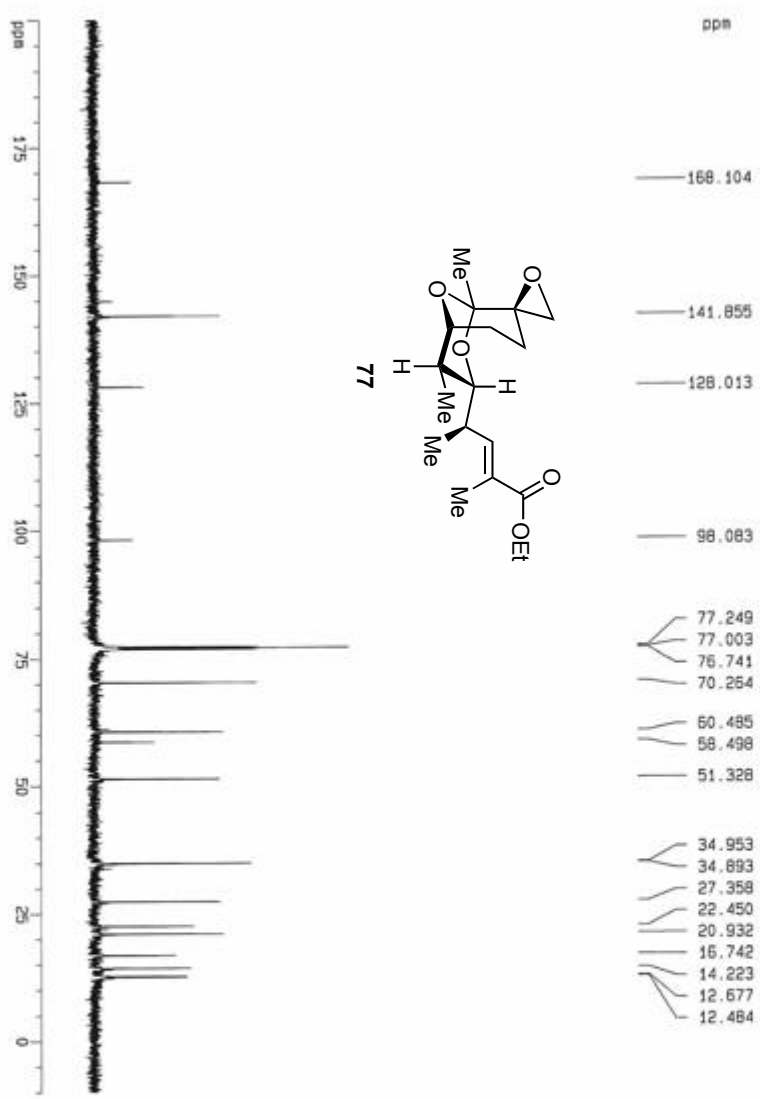

Current Data Parameters  
 NAME 411214  
 EXPNO 2  
 PROCNO 1

F2 - Acquisition Parameters  
 DATE\_ 20100823  
 TIME 15.13  
 INSTRUM spect  
 PROBRW 5 mm QNP 1H  
 PULPROG zgpg  
 TD 65536  
 SOLVENT CDCl3  
 NS 160  
 DS 4  
 SWH 30203.031 Hz  
 FIDRES 0.500033 Hz  
 AQ 0.9998830 sec  
 RG 16384  
 CW 16.500 usec  
 DE 7.50 usec  
 TE 300.0 K  
 D1 3.00000000 sec  
 d11 0.03000000 sec

===== CHANNEL f1 =====  
 NUC1 13C  
 P1 8.00 usec  
 PL1 3.00 dB  
 SF01 125.7715724 MHz

===== CHANNEL f2 =====  
 CPDPRG2 waltz16  
 NUC2 1H  
 P2 90.00 usec  
 PL2 120.00 dB  
 SF02 20.00 MHz  
 SFO2 500.1326000 MHz

F2 - Processing parameters  
 SI 32768  
 SF 125.7715724 MHz  
 KW 64  
 SFO 500.1326000 MHz  
 LB 0  
 GB 0  
 BR 1.00 Hz  
 PC 1.40

10 NMR plot parameters  
 CX 20.00 ca  
 FLP 200.000 ppm  
 F1 23151.95 Hz  
 F2 -10.000 ppm  
 F3 -1257.58 Hz  
 PPMCN 10.50000 ppm/ca  
 KICN 1370.45581 Hz/ca

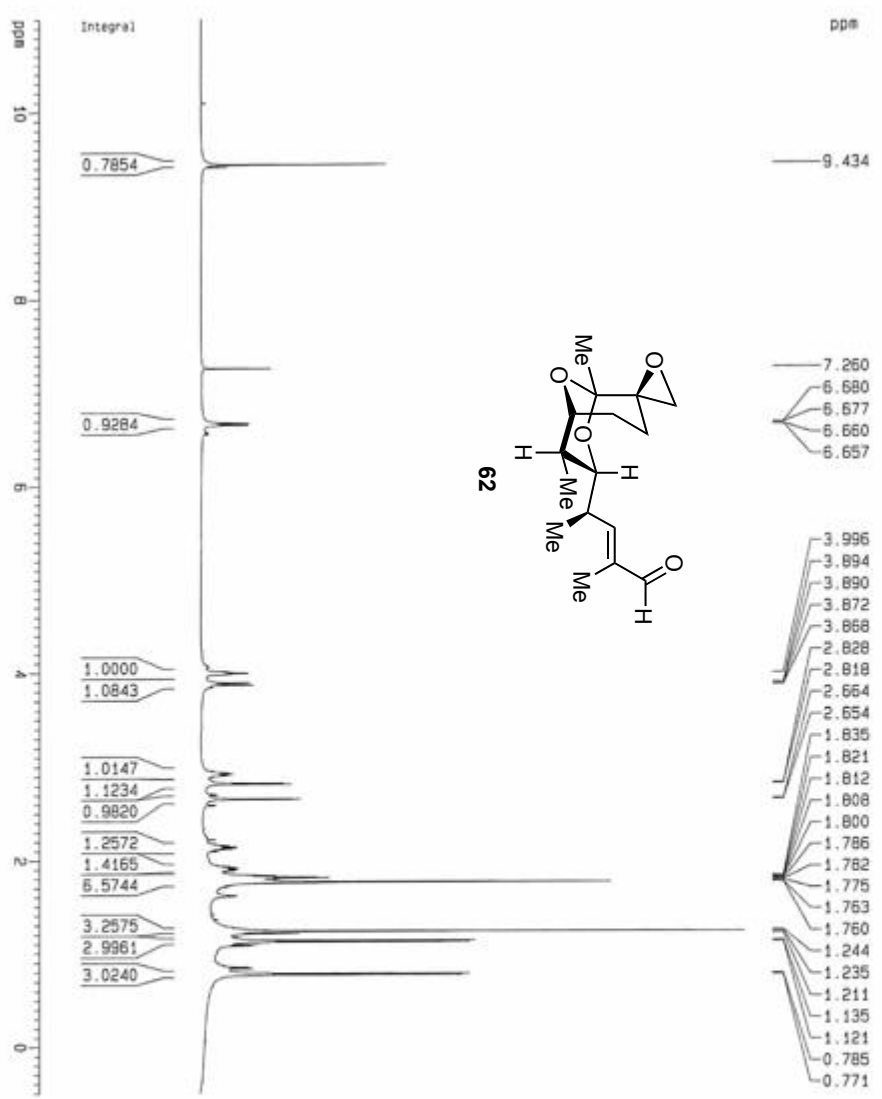

Current Data Parameters  
 NAME: S13216  
 EXPNO: 2  
 PROCNO: 1

F2 - Acquisition Parameters  
 Date\_: 20100825  
 Time: 11.29  
 INSTRUM: spect  
 PROGRAM: 5 mm QNP 1H  
 FILEPROG: 2D  
 TD: 45044  
 SOLVENT: Acetone  
 NS: 8  
 DS: 0  
 SWH: 7507.587 Hz  
 FIDRES: 0.166671 Hz  
 AQ: 2.999804 sec  
 RG: 64  
 CW: 66.600 uS/c  
 DE: 4.50 uS/c  
 TE: 300.0 K  
 O1: 3.00000000 sec

\*\*\*\*\* CHANNEL f1 \*\*\*\*\*  
 NUC1: 1H  
 P1: 9.00 uS/c  
 PL1: 0.00 dB  
 SFO1: 500.1365009 MHz

F2 - Processing parameters  
 SI: 65536  
 SF: 500.1300120 MHz  
 KW: EN  
 SSB: 0  
 LB: 0.30 Hz  
 GB: 0  
 PC: 1.00

1D NMR plot parameters  
 CX: 20.00 cm  
 F1P: 11.000 ppm  
 F1: 5001.43 Hz  
 F2P: -250.07 Hz  
 F2: 0.37950 ppm/cx  
 PPMX: 287.51477 Hz/cm

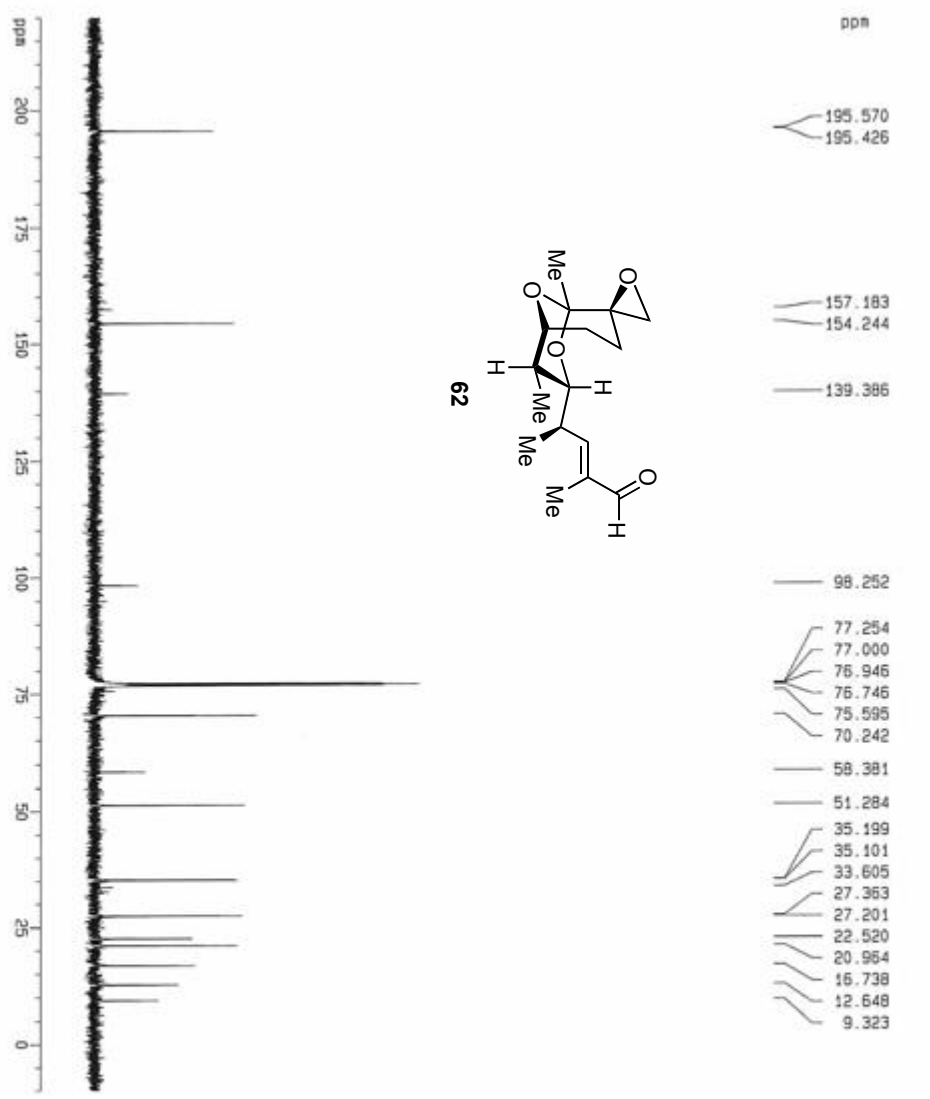

- ppm
- 195.570
  - 195.426
  - 157.183
  - 154.244
  - 139.386
  - 98.252
  - 77.254
  - 77.000
  - 76.946
  - 76.746
  - 75.595
  - 70.242
  - 58.381
  - 51.284
  - 35.199
  - 35.101
  - 33.605
  - 27.363
  - 27.201
  - 22.520
  - 20.964
  - 16.738
  - 12.648
  - 9.323

Current Data Parameters  
 NAME: 811226  
 EXPNO: 21  
 PROCNO: 1

F2 - Acquisition Parameters  
 Date\_: 20100825  
 Time: 11.32  
 INSTRUM: spect  
 PROBRD: 5 mm QNP 3H  
 PULPROG: zgpg30  
 TO: 65662  
 SOLVENT: CDCl3  
 NS: 272  
 DS: 4  
 SWH: 30301.031 Hz  
 FIDRES: 0.500033 Hz  
 AQ: 0.5999830 sec  
 RG: 16384  
 DM: 16.500 umsec  
 DE: 7.50 umsec  
 TE: 300.0 K  
 O1: 3.00000000 sec  
 d11: 0.03000000 sec

===== CHANNEL f1 =====  
 NUC1: 13C  
 P1: 8.00 umsec  
 PL1: 3.00 dB  
 SF01: 125.7712724 MHz

===== CHANNEL f2 =====  
 CPDPRG2: waltz16  
 NUC2: 1H  
 P2: 90.00 umsec  
 PL2: 120.00 dB  
 PL12: 20.00 dB  
 SF02: 500.1338050 MHz

F2 - Processing parameters  
 SI: 32768  
 SF: 125.7577532 MHz  
 KW: EM  
 SSB: 0  
 LB: 1.00 Hz  
 GB: 0  
 PC: 1.40

1D NMR plot parameters  
 CX: 20.00 cm  
 F1P: 220.000 ppm  
 F1: 27066.71 Hz  
 F2P: -10.000 ppm  
 F2: -1237.58 Hz  
 PPMCHK: 11.50000 ppm/cm  
 MZCK: 146.21460 Hz/cm

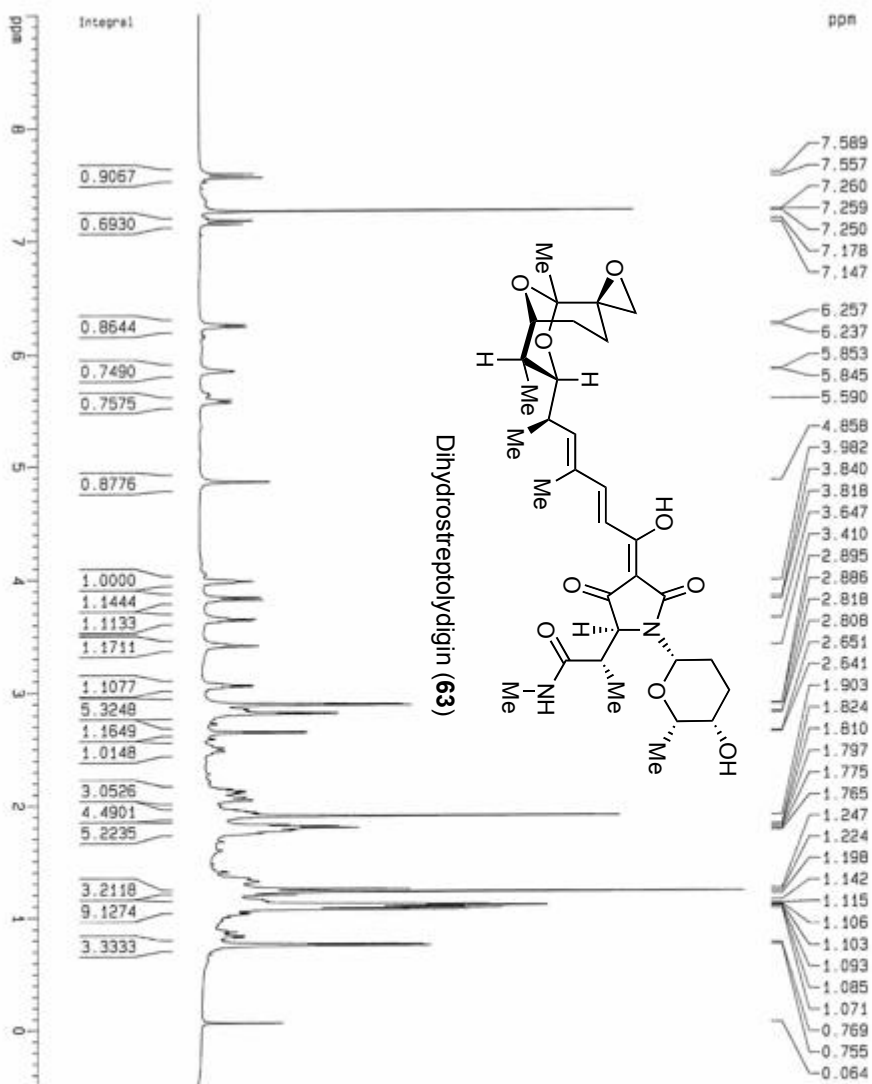

```

Current Data Parameters
NAME      d133217
EXPNO    1
PROCNO   1
-----
F2 - Acquisition Parameters
Date_    20100826
Time     17.15
INSTRUM spect
PROBHD   5 mm QNP 1H
PULPROG zgpg30
TD        65004
SOLVENT  Aceton
NS        32
DS         0
SWH       7007.507 Hz
FIDRES    0.166571 Hz
AQ        2.9999804 sec
RG         120
QM        56.600 usec
DE        4.50 usec
TE        300.0 K
===== CHANNEL f1 =====
NUC1      1H
P1        9.00 usec
PL1       0.00 dB
SFO1     500.1305099 MHz
-----
F2 - Processing parameters
SI        65536
SF        500.1300138 MHz
WDW       EM
SSB       0
LB        0.30 Hz
GB        0
PC        1.00
-----
1D NMR plot parameters
CX        20.00 cm
FIP       9.000 ppm
F1        4501.17 Hz
F2        -0.500 ppm
F3        -250.07 Hz
SFOUWCK   0.47500 ppm/cm
H2OUMCK   237.96175 Hz/cm

```

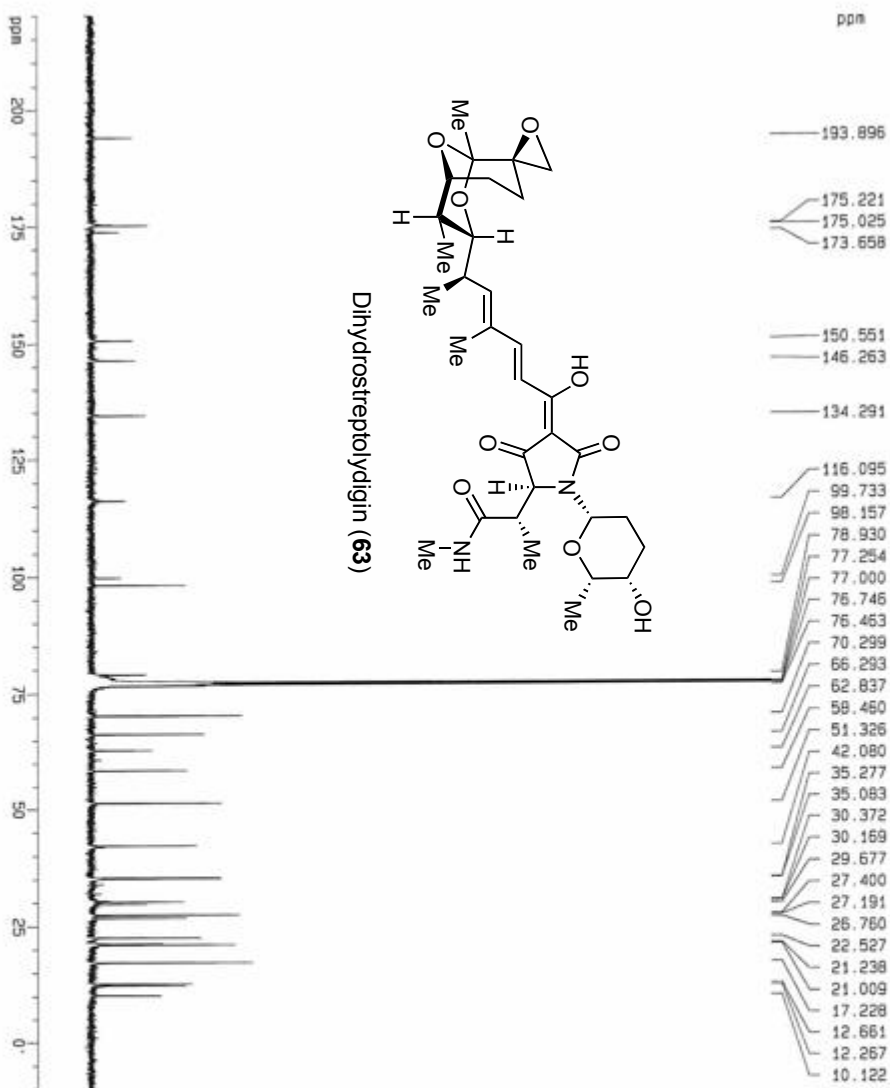

| Chemical Shift (ppm) |
|----------------------|
| 193.896              |
| 175.221              |
| 175.025              |
| 173.658              |
| 150.551              |
| 146.263              |
| 134.291              |
| 116.095              |
| 99.733               |
| 98.157               |
| 78.930               |
| 77.254               |
| 77.000               |
| 76.746               |
| 76.463               |
| 70.299               |
| 66.293               |
| 62.837               |
| 58.460               |
| 51.326               |
| 42.080               |
| 35.277               |
| 35.083               |
| 30.372               |
| 30.169               |
| 29.677               |
| 27.400               |
| 27.191               |
| 26.760               |
| 22.527               |
| 21.238               |
| 21.009               |
| 17.228               |
| 12.661               |
| 12.267               |
| 10.122               |

```

Current Data Parameters
Name      s13x17
ExpNO    2
PROCNO   1

F2 - Acquisition Parameters
Date_    20100827
Time     21:13
INSTRUM  spect
PROBHD   5 mm DPX 5H
PULPROG  zgpg30
TD        65536
SOLVENT  CDCl3
NS        31880
DS        4
SWH       30303.031 Hz
FIDRES   0.500033 Hz
AQ        0.9999630 sec
RG        56384
DM        16.500 usec
DE        7.50 usec
TE        300.0 K
D1        0.36000001 sec
d11       0.03000000 sec

===== CHANNEL f1 =====
NUC1      13C
P1        4.00 usec
PL1       3.00 dB
SFO1     125.7715724 MHz

===== CHANNEL f2 =====
ORIGIN2   MATI16
NUC2      1H
P2        90.00 usec
PL2       120.00 dB
SFO2     500.1326000 MHz

F2 - Processing parameters
SI        32768
SF        325.757702 MHz
WDW       EM
SSB       0
LB        1.00 Hz
GB        0
PC        1.00

1D NMR plot parameters
CK        20.00 cm
F1P       220.000 ppm
F1        27656.71 Hz
F2P       -10.000 ppm
F2        -1257.58 Hz
PRCKM     11.50000 ppm/cx
HDCM     1446.21460 Hz/cx
  
```
